# Supplementary material for: Necdin, a p53-Target Gene, Is an Inhibitor of p53-Mediated Growth Arrest
Source: PLoS One. 2012 Feb 15;7(2):e31916. doi: 10.1371/journal.pone.0031916 (PMC3280226; doi:10.1371/journal.pone.0031916)
Supplement: Table S1 — Microarrays analysis containing 194 genes modulated by PyLT expression in NIH3T3 (1,5 folds, P ≤0.02). (XLS) [file pone.0031916.s001.xls]

## Sheet: datasheet
	negative	negative	undetected	undetected		positive	positive	positive	positive	positive	positive	positive	low										not included in analysis
	NIH3T3cM	NIH3T3*	C12	C7		C32	C46	C47*	C11*	C40*	C50*	GFPLTA	C33		Gene name and informations			AVG PyLTneg	AVG PyLTpos	fold	ttest		C33 fold	gfpPyLT fold
101368_at	2302	2067	1758	2166		50	50	50	50	321	65	50	159		Placentae and embryos oncofetal gene /cds=(106,738) /gb=M32484 /gi=200286 /ug=Mm.6923 /len=853 /STRA=for			2073.25	97.6667	0.047108	7.70559e-08		0.0766912	0.0241167
93541_at	872	1998	887	640		55	77	323	144	267	50	193	486		Transgelin /cds=(12,617) /gb=Z68618 /gi=1160197 /ug=Mm.2006 /len=1016 /STRA=for			1099.25	152.667	0.138883	0.00514119		0.44212	0.175574
96939_at	148	559	461	106		50	50	50	50	50	50	50	65		UI-M-AQ1-aed-g-07-0-UI.s1 Mus musculus cDNA, 3' end /clone=UI-M-AQ1-aed-g-07-0-UI /clone_end=3' /gb=AI842649 /gi=5476862 /ug=Mm.30188 /len=312 /STRA=for			318.5	50	0.156986	0.0167119		0.204082	0.156986
98623_g_at	664	206	50	50		50	50	93	50	50	50	50	50		Insulin-like growth factor 2 /cds=(0,236) /gb=X71922 /gi=393424 /ug=Mm.3862 /len=3301 /STRA=for			242.5	57.1667	0.235739	0.146219		0.206186	0.206186
97498_at	50	839	686	206		100	85	169	50	76	230	58	97		Mus musculus RBP associated molecule RAM14-1 mRNA, complete cds /cds=(82,924) /gb=U41739 /gi=2894671 /ug=Mm.3126 /len=2270 /STRA=for			445.25	118.333	0.265768	0.0650983		0.217855	0.130264
100706_f_at	133	1038	82	110		79	74	97	150	74	96	68	211		EST00677 Mus musculus cDNA, 3' end /clone=C0001D10 /clone_end=3' /gb=AA407367 /gi=2065592 /ug=Mm.27840 /len=399 /STRA=rev			340.75	95	0.278797	0.219599		0.619222	0.19956
93100_at	2589	5492	3326	2091		954	690	1852	894	1046	1378	1093	2224		Mouse mRNA for vascular smooth muscle alpha-actin /cds=(49,1182) /gb=X13297 /gi=49861 /ug=Mm.16537 /len=1340 /STRA=for			3374.5	1135.67	0.336544	0.00746894		0.659061	0.3239
104210_at	236	211	186	218		75	64	89	62	50	91	55	69		UI-M-AK0-adi-f-03-0-UI.s1 Mus musculus cDNA, 3' end /clone=UI-M-AK0-adi-f-03-0-UI /clone_end=3' /gb=AI839082 /gi=5473295 /ug=Mm.2775 /len=212 /STRA=for			212.75	71.8333	0.337642	1.98166e-06		0.324324	0.258519
95014_at	414	1111	535	688		254	172	282	181	303	270	205	303		vu65b08.r1 Mus musculus cDNA, 5' end /clone=IMAGE-1196247 /clone_end=5' /gb=AA794247 /gi=2857202 /ug=Mm.27445 /len=496 /STRA=for			687	243.667	0.354682	0.00705056		0.441048	0.298399			decreased expression in PyLT-expressing cells
96155_at	355	225	214	257		71	50	105	109	218	50	154	50		UI-M-BH1-ane-a-09-0-UI.s1 Mus musculus cDNA, 3' end /clone=UI-M-BH1-ane-a-09-0-UI /clone_end=3' /gb=AW049359 /gi=5909888 /ug=Mm.28297 /len=384 /STRA=for			262.75	100.5	0.382493	0.00417084		0.190295	0.586108			increased expression in PyLT-expressing cells
103232_at	191	204	194	189		50	67	106	96	85	50	213	89		UI-M-BH1-anq-b-10-0-UI.s1 Mus musculus cDNA, 3' end /clone=UI-M-BH1-anq-b-10-0-UI /clone_end=3' /gb=AW060580 /gi=6008331 /ug=Mm.20332 /len=444 /STRA=for			194.5	75.6667	0.389032	1.15667e-05		0.457584	1.09512			ttest ≤ 0,02
93285_at	665	681	365	614		74	143	370	423	225	127	223	193		UI-M-AQ1-adx-c-06-0-UI.s1 Mus musculus cDNA, 3' end /clone=UI-M-AQ1-adx-c-06-0-UI /clone_end=3' /gb=AI845584 /gi=5489490 /ug=Mm.1791 /len=254 /STRA=for			581.25	227	0.390538	0.00500778		0.332043	0.383656
95556_at	275	268	100	214		50	50	180	134	50	50	183	50		UI-M-AM0-adv-f-01-0-UI.s1 Mus musculus cDNA, 3' end /clone=UI-M-AM0-adv-f-01-0-UI /clone_end=3' /gb=AI841364 /gi=5475577 /ug=Mm.27754 /len=389 /STRA=for			214.25	85.6667	0.399844	0.0178352		0.233372	0.854142
96682_at	50	293	82	180		93	50	50	84	50	50	50	73		Mus musculus mRNA for Sia-alpha-2-3-Gal-beta-1-3-GalNAc GalNAc-alpha-2,6-sialyltransferase, isoform 2 /cds=UNKNOWN /gb=Y15780 /gi=4902852 /ug=Mm.27446 /len=1653 /STRA=rev			151.25	62.8333	0.415427	0.0820438		0.482645	0.330579
96866_at	173	233	67	222		50	50	108	94	83	50	75	86		UI-M-BH1-alk-c-09-0-UI.s1 Mus musculus cDNA, 3' end /clone=UI-M-BH1-alk-c-09-0-UI /clone_end=3' /gb=AW047756 /gi=5908285 /ug=Mm.30060 /len=452 /STRA=for			173.75	72.5	0.417266	0.0148417		0.494964	0.431655
93330_at	319	323	188	431		50	115	180	305	66	80	50	127		Aquaporin 1 /cds=(59,868) /gb=L02914 /gi=193642 /ug=Mm.18625 /len=2627 /STRA=for			315.25	132.667	0.42083	0.0198107		0.402855	0.158604
93448_at	50	281	50	85		50	50	50	50	50	50	50	50		vw32f10.r1 Mus musculus cDNA, 5' end /clone=IMAGE-1245547 /clone_end=5' /gb=AA798076 /gi=2861031 /ug=Mm.6724 /len=379 /STRA=for			116.5	50	0.429185	0.167749		0.429185	0.429185
104444_at	124	160	141	134		50	86	50	64	61	50	60	114		vt63c12.r1 Mus musculus cDNA, 5' end /clone=IMAGE-1167766 /clone_end=5' /gb=AA689927 /gi=2690863 /ug=Mm.29321 /len=163 /STRA=for			139.75	60.1667	0.430531	2.83057e-05		0.815742	0.429338
93866_s_at	438	297	50	90		50	50	114	270	50	50	95	50		Matrix gamma-carboxyglutamate (gla) protein /cds=(18,332) /gb=D00613 /gi=220478 /ug=Mm.87793 /len=540 /STRA=for			218.75	97.3333	0.444952	0.190421		0.228571	0.434286
93793_at	1071	1675	1231	975		498	375	745	690	562	494	305	433		UI-M-BH2.1-aoy-c-12-0-UI.s1 Mus musculus cDNA, 3' end /clone=UI-M-BH2.1-aoy-c-12-0-UI /clone_end=3' /gb=AW122780 /gi=6098310 /ug=Mm.21387 /len=148 /STRA=for			1238	560.667	0.452881	0.00134805		0.349758	0.246365
99058_at	1375	1955	1979	1974		911	734	845	689	993	837	492	1479		High mobility group protein I, isoform C /cds=(900,1226) /gb=X99915 /gi=1595757 /ug=Mm.3953 /len=3382 /STRA=for			1820.75	834.833	0.458511	6.62249e-05		0.812303	0.270218
103006_at	466	527	1165	656		117	222	394	341	498	410	388	708		Mus musculus mRNA for ATFx, partial cds /cds=(0,254) /gb=AB012276 /gi=2988372 /ug=Mm.1566 /len=850 /STRA=for			703.5	330.333	0.469557	0.032129		1.0064	0.551528
92777_at	596	1382	1026	783		678	307	406	497	499	291	1092	885		Insulin-like growth factor binding protein 10 /cds=(189,1328) /gb=M32490 /gi=192909 /ug=Mm.1231 /len=2018 /STRA=for			946.75	446.333	0.471437	0.0113622		0.934777	1.15342
100050_at	777	878	481	566		234	122	580	629	175	199	451	83		Inhibitor of DNA binding 1 /cds=(0,532) /gb=M31885 /gi=194090 /ug=Mm.444 /len=927 /STRA=for			675.5	323.167	0.478411	0.0305059		0.122872	0.667654
97689_at	246	1213	390	370		134	99	317	298	353	447	501	456		Coagulation factor III /cds=UNKNOWN /gb=M26071 /gi=201924 /ug=Mm.3742 /len=1821 /STRA=for			554.75	274.667	0.495118	0.174636		0.821992	0.90311
93486_at	153	179	121	191		50	50	75	125	77	126	147	50		Fatty acid transport protein /cds=(0,1940) /gb=U15976 /gi=563828 /ug=Mm.7206 /len=1941 /STRA=rev			161	83.8333	0.520704	0.00688552		0.310559	0.913043
102425_at	488	475	274	313		147	97	193	163	342	270	131	81		Mus musculus groucho-related gene 1 protein (Grg1) mRNA, complete cds /cds=(54,2366) /gb=U61362 /gi=1420928 /ug=Mm.12823 /len=2381 /STRA=for			387.5	202	0.52129	0.0185062		0.209032	0.338065
95685_at	542	501	346	479		126	225	403	273	246	221	369	154		UI-M-AL1-ahl-e-08-0-UI.s1 Mus musculus cDNA, 3' end /clone=UI-M-AL1-ahl-e-08-0-UI /clone_end=3' /gb=AI849678 /gi=5493584 /ug=Mm.29627 /len=204 /STRA=for			467	249	0.533191	0.00505137		0.329764	0.79015
98019_at	256	965	632	410		191	299	432	256	353	288	215	363		Mus musculus HIC-5 mRNA, complete cds /cds=(196,1530) /gb=L22482 /gi=664954 /ug=Mm.3248 /len=1877 /STRA=for			565.75	303.167	0.535867	0.075681		0.641626	0.380027
94378_at	1132	475	478	886		265	395	702	640	220	178	253	223		Mus musculus retinally abundant regulator of G-protein signaling mRGS-r (RGS-r) mRNA, complete cds /cds=(109,714) /gb=U94828 /gi=2605641 /ug=Mm.2555 /len=2250 /STRA=for			742.75	400	0.538539	0.0802208		0.300236	0.340626
96713_at	101	160	54	51		50	50	50	50	50	50	56	54		3'-phosphoadenosine 5'-phosphosulfate synthase 2 /cds=(130,1995) /gb=AF052453 /gi=3342265 /ug=Mm.27646 /len=1996 /STRA=for			91.5	50	0.546448	0.0739136		0.590164	0.612022
93670_at	246	302	265	339		184	209	137	292	75	50	235	179		UI-M-BH1-amc-h-10-0-UI.s1 Mus musculus cDNA, 3' end /clone=UI-M-BH1-amc-h-10-0-UI /clone_end=3' /gb=AW048233 /gi=5908762 /ug=Mm.8068 /len=429 /STRA=for			288	157.833	0.548032	0.0279565		0.621528	0.815972
101851_at	164	56	50	90		50	51	50	50	50	50	60	50		Antigen identified by monoclonal antibody MRC OX-2 /cds=(0,836) /gb=AF029215 /gi=2739125 /ug=Mm.8649 /len=837 /STRA=for			90	50.1667	0.557407	0.0906062		0.555556	0.666667
95436_at	152	52	164	50		50	50	60	50	54	86	185	50		Somatostatin /cds=(100,450) /gb=X51468 /gi=53768 /ug=Mm.2453 /len=599 /STRA=for			104.5	58.3333	0.558214	0.108216		0.478469	1.77033
100471_at	445	394	170	370		92	121	317	278	190	157	158	105		UI-M-BH1-amo-b-04-0-UI.s1 Mus musculus cDNA, 3' end /clone=UI-M-BH1-amo-b-04-0-UI /clone_end=3' /gb=AW048916 /gi=5909445 /ug=Mm.4940 /len=390 /STRA=for			344.75	192.5	0.558376	0.0491903		0.304569	0.458303
94277_at	108	107	149	86		107	65	50	55	50	50	59	102		Mus musculus thrombospondin 3 and metaxin genes, exon 1, partial cds, and intergenic region /cds=(0,81) /gb=U66257 /gi=1575552 /ug=Mm.22508 /len=82 /STRA=for			112.5	62.8333	0.558519	0.0124204		0.906667	0.524444
94870_f_at	257	329	198	154		50	55	216	156	144	165	123	94		UI-M-BH2.1-aph-d-10-0-UI.s1 Mus musculus cDNA, 3' end /clone=UI-M-BH2.1-aph-d-10-0-UI /clone_end=3' /gb=AW124226 /gi=6099756 /ug=Mm.23755 /len=382 /STRA=for			234.5	131	0.558635	0.0501936		0.400853	0.52452
102867_at	163	124	93	133		55	66	83	50	88	91	56	98		TEA domain family member 4 /cds=(0,1138) /gb=U51743 /gi=1381555 /ug=Mm.14774 /len=1339 /STRA=for			128.25	72.1667	0.562703	0.00475854		0.764133	0.436647
100539_at	547	916	525	603		263	215	471	445	346	451	114	161		UI-M-AM0-adu-e-08-0-UI.s1 Mus musculus cDNA, 3' end /clone=UI-M-AM0-adu-e-08-0-UI /clone_end=3' /gb=AI841279 /gi=5475492 /ug=Mm.5293 /len=439 /STRA=for			647.75	365.167	0.563746	0.0142231		0.248553	0.175994
97747_r_at	50	297	50	438		50	59	55	115	368	61	50	267		Mus musculus Hox-1.4 gene /cds=(13,523) /gb=X66861 /gi=51377 /ug=Mm.4027 /len=524 /STRA=for			208.75	118	0.565269	0.386596		1.27904	0.239521
97504_at	204	102	239	232		169	88	80	50	117	163	240	142		Cyclin D2 /cds=(270,1139) /gb=M83749 /gi=192938 /ug=Mm.3141 /len=1255 /STRA=for			194.25	111.167	0.572287	0.0443682		0.731017	1.23552
92300_at	106	96	103	149		50	50	109	77	50	55	100	97		Max binding protein /cds=(351,2126) /gb=Y07609 /gi=1841929 /ug=Mm.3759 /len=2299 /STRA=for			113.5	65.1667	0.574156	0.0140842		0.854626	0.881057
103890_at	101	184	172	73		50	120	75	106	50	56	110	77		UI-M-BH1-ano-g-01-0-UI.s1 Mus musculus cDNA, 3' end /clone=UI-M-BH1-ano-g-01-0-UI /clone_end=3' /gb=AW050153 /gi=5910682 /ug=Mm.21287 /len=220 /STRA=for			132.5	76.1667	0.574843	0.0650129		0.581132	0.830189
93929_s_at	2193	3169	3285	1017		171	555	2283	2192	1680	1455	952	945		Mouse mrp/plf3 gene for mitogen regulated protein/proliferin (MRP/PLF), exon 1 (and joined CDS) /cds=(68,742) /gb=X16009 /gi=53223 /ug=Mm.89924 /len=743 /STRA=for			2416	1389.33	0.575055	0.128457		0.391142	0.39404
93178_at	734	95	50	563		72	163	123	69	766	51	99	120		UI-M-BH1-ang-d-03-0-UI.s1 Mus musculus cDNA, 3' end /clone=UI-M-BH1-ang-d-03-0-UI /clone_end=3' /gb=AW050346 /gi=5910875 /ug=Mm.539 /len=544 /STRA=rev			360.5	207.333	0.575127	0.45493		0.332871	0.274619
94492_at	2360	4816	2973	1763		1016	941	2201	2160	1625	2429	1727	1918		Mus musculus mRNA for sid23p, complete cds /cds=(34,531) /gb=AB025406 /gi=5931560 /ug=Mm.28919 /len=1639 /STRA=for			2978	1728.67	0.580479	0.0769054		0.644056	0.579919
99027_at	413	291	521	420		345	265	128	268	279	150	156	385		Bcl2-like /cds=(242,943) /gb=L35049 /gi=561740 /ug=Mm.3882 /len=979 /STRA=for			411.25	239.167	0.58156	0.0158571		0.93617	0.379331
99518_at	161	382	141	274		92	67	180	112	180	210	95	84		UI-M-BH2.3-aok-a-06-0-UI.s1 Mus musculus cDNA, 3' end /clone=UI-M-BH2.3-aok-a-06-0-UI /clone_end=3' /gb=AW121179 /gi=6096512 /ug=Mm.41931 /len=479 /STRA=for			239.5	140.167	0.585247	0.097628		0.350731	0.39666
100068_at	99	50	50	208		107	50	50	50	50	51	50	92		Mouse aldehyde dehydrogenase II mRNA, complete cds /cds=(44,1549) /gb=M74570 /gi=191803 /ug=Mm.4514 /len=2038 /STRA=for			101.75	59.6667	0.586405	0.221481		0.904177	0.4914
103624_at	93	188	172	160		50	50	126	81	101	134	109	111		UI-M-BH2.2-aom-a-05-0-UI.s1 Mus musculus cDNA, 3' end /clone=UI-M-BH2.2-aom-a-05-0-UI /clone_end=3' /gb=AW121323 /gi=6096656 /ug=Mm.20273 /len=358 /STRA=for			153.25	90.3333	0.589451	0.0352217		0.724307	0.711256
102798_at	297	656	369	290		255	89	131	174	244	536	440	324		Adrenomedullin /cds=(175,729) /gb=U77630 /gi=1684819 /ug=Mm.1408 /len=1381 /STRA=for			403	238.167	0.590984	0.158814		0.80397	1.09181
93294_at	1247	2702	2760	1783		1526	932	997	826	1710	1557	790	990		Fibroblast inducible secreted protein /cds=(137,1183) /gb=M70642 /gi=193315 /ug=Mm.1810 /len=2267 /STRA=for			2123	1258	0.592558	0.038578		0.466321	0.372115
102769_f_at	93	71	99	73		50	50	50	50	50	50	80	50		Mus musculus mRNA for sterol-C5-desaturase, complete cds /cds=(170,1069) /gb=AB016248 /gi=3721883 /ug=Mm.13081 /len=1721 /STRA=for			84	50	0.595238	0.000288681		0.595238	0.952381
103980_at	177	157	168	166		127	72	50	50	192	106	50	79		Eph receptor A2 /cds=(96,3023) /gb=U07634 /gi=467232 /ug=Mm.2581 /len=3873 /STRA=for			167	99.5	0.595808	0.0433152		0.473054	0.299401
95022_at	54	173	153	103		50	50	50	50	91	143	78	61		Mus musculus mRNA for SSeCKS, complete cds /cds=(139,5193) /gb=AB020886 /gi=4589831 /ug=Mm.27481 /len=6195 /STRA=for			120.75	72.3333	0.599034	0.13075		0.505176	0.645963
93710_at	166	282	239	146		50	171	117	174	188	50	259	50		Mouse serine 1 ultra high sulfur protein gene, complete cds /cds=(0,692) /gb=M37759 /gi=200961 /ug=Mm.86481 /len=693 /STRA=for			208.25	125	0.60024	0.0751862		0.240096	1.2437
94518_at	283	304	191	229		71	90	204	243	173	128	150	132		UI-M-BH2.3-aoe-c-12-0-UI.s1 Mus musculus cDNA, 3' end /clone=UI-M-BH2.3-aoe-c-12-0-UI /clone_end=3' /gb=AW121749 /gi=6097084 /ug=Mm.28999 /len=313 /STRA=for			251.75	151.5	0.601787	0.0356575		0.52433	0.595829
104195_at	1038	514	582	1159		486	559	533	514	498	385	705	420		vz49d01.r1 Mus musculus cDNA, 5' end /clone=IMAGE-1329793 /clone_end=5' /gb=AA939440 /gi=3100217 /ug=Mm.27503 /len=379 /STRA=for			823.25	495.833	0.602288	0.0372583		0.510173	0.856362
95496_at	293	264	81	168		50	58	229	267	50	77	219	125		UI-M-AJ1-ahb-f-01-0-UI.s1 Mus musculus cDNA, 3' end /clone=UI-M-AJ1-ahb-f-01-0-UI /clone_end=3' /gb=AI848866 /gi=5492772 /ug=Mm.25125 /len=383 /STRA=for			201.5	121.833	0.604632	0.24354		0.620347	1.08685
102636_at	50	74	50	155		50	50	50	50	50	50	50	50		Kinesin light chain 2 /cds=(134,1933) /gb=AF055666 /gi=3347847 /ug=Mm.12958 /len=2840 /STRA=for			82.25	50	0.607903	0.14001		0.607903	0.607903
94689_at	156	101	148	145		88	76	87	86	69	97	313	102		C79248 Mus musculus cDNA, 3' end /clone=J0063C04 /clone_end=3' /gb=C79248 /gi=2519578 /ug=Mm.13291 /len=476 /STRA=rev			137.5	83.8333	0.609697	0.00123381		0.741818	2.27636
96106_at	160	236	126	157		56	111	123	176	84	72	187	61		UI-M-BH1-amt-h-11-0-UI.s1 Mus musculus cDNA, 3' end /clone=UI-M-BH1-amt-h-11-0-UI /clone_end=3' /gb=AW049122 /gi=5909651 /ug=Mm.26903 /len=513 /STRA=for			169.75	103.667	0.610702	0.0506542		0.359352	1.10162
104286_at	559	544	416	505		328	278	359	239	294	359	616	339		vq96e09.r1 Mus musculus cDNA, 5' end /clone=IMAGE-1110184 /clone_end=5' /gb=AA795541 /gi=2858496 /ug=Mm.22260 /len=393 /STRA=for			506	309.5	0.61166	0.000521556		0.66996	1.21739
102148_f_at	53	340	72	50		167	52	51	104	50	50	50	193		Mouse interferon-alpha (IFN-alpha-1-9) gene, complete cds /cds=(0,572) /gb=M13660 /gi=194100 /ug=Mm.46794 /len=573 /STRA=for			128.75	79	0.613592	0.438065		1.49903	0.38835
93716_at	213	192	269	240		171	181	110	105	146	132	142	356		Mus musculus thrombospondin 3 (Thbs3) gene, partial cds and mucin 1 (Muc1) gene, complete cds /cds=(0,393) /gb=U16175 /gi=608488 /ug=Mm.86637 /len=394 /STRA=for			228.5	140.833	0.616338	0.00283728		1.55799	0.621444
103601_at	214	250	164	208		113	97	132	123	137	172	94	261		UI-M-BH1-alf-h-09-0-UI.s1 Mus musculus cDNA, 3' end /clone=UI-M-BH1-alf-h-09-0-UI /clone_end=3' /gb=AW046150 /gi=5906679 /ug=Mm.20066 /len=275 /STRA=for			209	129	0.617225	0.00300147		1.2488	0.449761
95387_f_at	117	130	80	107		63	50	101	84	54	50	78	50		mz67g09.r1 Mus musculus cDNA, 5' end /clone=IMAGE-718528 /clone_end=5' /gb=AA266467 /gi=1902637 /ug=Mm.23470 /len=372 /STRA=rev			108.5	67	0.617512	0.0158452		0.460829	0.718894
93883_at	3121	4186	4025	1271		141	830	3305	3194	2403	1841	1468	1270		Proliferin /cds=(66,740) /gb=K03235 /gi=200398 /ug=Mm.88796 /len=850 /STRA=for			3150.75	1952.33	0.619641	0.19078		0.403079	0.465921
104647_at	775	1152	760	908		273	286	454	553	1098	708	296	522		Mouse glucocortoid-regulated inflammatory prostaglandin G/H synthase (griPGHS) mRNA, complete cds /cds=(100,1914) /gb=M88242 /gi=193637 /ug=Mm.3137 /len=4152 /STRA=for			898.75	562	0.625313	0.0884213		0.580807	0.329346
94964_at	50	235	54	50		50	50	67	50	52	98	50	50		Vinculin /cds=(17,3217) /gb=L18880 /gi=309532 /ug=Mm.27206 /len=3228 /STRA=rev			97.25	61.1667	0.628963	0.365456		0.514139	0.514139
95796_g_at	507	545	229	433		108	116	460	447	270	217	222	199		Mus musculus Supt4h2 gene, complete cds /cds=(0,353) /gb=U96810 /gi=3779195 /ug=Mm.87825 /len=354 /STRA=for			428.5	269.667	0.629327	0.13931		0.464411	0.518086
97125_f_at	218	287	131	188		52	100	238	193	108	89	84	76		Mouse MHC (A.CA/J(H-2K-f) class I antigen mRNA, complete cds /cds=(12,1121) /gb=M58156 /gi=199429 /ug=Mm.34332 /len=1457 /STRA=for			206	130	0.631068	0.123529		0.368932	0.407767
104211_at	119	274	105	144		93	98	102	112	123	83	86	96		Mouse mRNA for VLA-3 alpha subunit /cds=(0,3161) /gb=D13867 /gi=220634 /ug=Mm.2775 /len=3162 /STRA=for			160.5	101.833	0.634476	0.0988446		0.598131	0.535826
102062_at	270	55	250	182		210	154	140	105	50	66	322	90		Mus musculus SRG3 mRNA, complete cds /cds=(60,3362) /gb=U85614 /gi=1816634 /ug=Mm.1050 /len=4765 /STRA=for			189.25	120.833	0.638485	0.199636		0.475561	1.70145
103039_at	50	277	132	50		50	50	130	50	140	69	50	50		Integrin alpha 5 (fibronectin receptor alpha) /cds=(179,3340) /gb=X79003 /gi=475910 /ug=Mm.16234 /len=3500 /STRA=for			127.25	81.5	0.640472	0.363518		0.392927	0.392927
102370_at	208	319	114	153		50	94	139	219	170	91	204	152		vp36a09.r1 Mus musculus cDNA, 5' end /clone=IMAGE-1078744 /clone_end=5' /gb=AA822174 /gi=2892042 /ug=Mm.1187 /len=329 /STRA=for			198.5	127.167	0.640638	0.168353		0.765743	1.02771
94057_g_at	513	467	194	428		50	140	369	328	401	252	448	268		Stearoyl-coenzyme A desaturase 1 /cds=(0,1067) /gb=M21285 /gi=200949 /ug=Mm.22026 /len=1068 /STRA=for			400.5	256.667	0.640866	0.148495		0.669164	1.1186
96024_at	1597	1295	869	1590		665	609	1008	920	1047	899	1058	738		Mus musculus (clone C7/B9) S-adenosyl homocysteine hydrolase (ahcy) mRNA, complete cds /cds=(5,1303) /gb=L32836 /gi=904131 /ug=Mm.2573 /len=2057 /STRA=for			1337.75	858	0.641375	0.0190512		0.551673	0.79088
100562_at	137	176	50	119		50	50	123	111	82	50	82	50		UI-M-AN1-afa-a-03-0-UI.s1 Mus musculus cDNA, 3' end /clone=UI-M-AN1-afa-a-03-0-UI /clone_end=3' /gb=AI846319 /gi=5490225 /ug=Mm.5669 /len=310 /STRA=for			120.5	77.6667	0.644537	0.14886		0.414938	0.680498
98341_f_at	151	173	104	142		50	50	130	176	59	87	60	50		vq48e08.x1 Mus musculus cDNA, 3' end /clone=IMAGE-1097510 /clone_end=3' /gb=AI506202 /gi=4404053 /ug=Mm.43197 /len=338 /STRA=rev			142.5	92	0.645614	0.114664		0.350877	0.421053
96766_s_at	86	68	89	105		50	50	50	50	83	55	50	69		Mouse mRNA for receptor tyrosine kinase, complete cds /cds=(13,2655) /gb=AB000828 /gi=1871412 /ug=Mm.2901 /len=2845 /STRA=for			87	56.3333	0.64751	0.00938081		0.793103	0.574713
95159_at	318	486	372	329		103	183	360	326	224	273	227	155		UI-M-AI1-afk-e-04-0-UI.s1 Mus musculus cDNA, 3' end /clone=UI-M-AI1-afk-e-04-0-UI /clone_end=3' /gb=AI846849 /gi=5490755 /ug=Mm.29484 /len=332 /STRA=for			376.25	244.833	0.65072	0.0505071		0.41196	0.603322
103975_at	200	544	136	127		140	107	240	185	226	85	146	136		Mus musculus mRNA for PRDC, complete cds /cds=(248,754) /gb=AB011030 /gi=3252784 /ug=Mm.25760 /len=3745 /STRA=for			251.75	163.833	0.650778	0.328695		0.540218	0.57994
100514_at	223	139	158	202		141	138	100	69	131	126	233	132		Mouse G-alpha-13 protein mRNA, complete cds /cds=(128,1261) /gb=M63660 /gi=193378 /ug=Mm.5238 /len=2422 /STRA=rev			180.5	117.5	0.65097	0.016683		0.731302	1.29086
93974_at	156	518	204	255		98	136	209	260	286	120	141	113		uo89c05.x1 Mus musculus cDNA, 3' end /clone=IMAGE-2649704 /clone_end=3' /gb=AW212475 /gi=6518562 /ug=Mm.21679 /len=230 /STRA=for			283.25	184.833	0.652545	0.227743		0.398941	0.497793
98151_s_at	323	577	514	315		318	281	256	234	329	275	248	216		Catenin src /cds=(342,3077) /gb=Z17804 /gi=53544 /ug=Mm.35738 /len=4636 /STRA=rev			432.25	282.167	0.652786	0.0275797		0.499711	0.573742
95294_at	190	131	131	188		212	107	66	50	142	50	144	118		vo28f05.x1 Mus musculus cDNA, 3' end /clone=IMAGE-1051233 /clone_end=3' /gb=AI605509 /gi=4614676 /ug=Mm.1939 /len=361 /STRA=rev			160	104.5	0.653125	0.153271		0.7375	0.9
94955_at	144	87	50	64		50	50	61	50	77	50	50	59		UI-M-BH2.3-aqh-g-03-0-UI.s1 Mus musculus cDNA, 3' end /clone=UI-M-BH2.3-aqh-g-03-0-UI /clone_end=3' /gb=AW125433 /gi=6100963 /ug=Mm.27150 /len=449 /STRA=for			86.25	56.3333	0.65314	0.122229		0.684058	0.57971
100534_at	289	452	187	220		66	167	190	260	266	178	205	143		ub91h12.r1 Mus musculus cDNA, 5' end /clone=IMAGE-1395911 /clone_end=5' /gb=AI183109 /gi=3733747 /ug=Mm.5248 /len=358 /STRA=for			287	187.833	0.654472	0.135236		0.498258	0.714286
92608_at	156	543	263	57		86	70	255	178	214	200	93	110		Cysteine rich protein /cds=(130,711) /gb=D88793 /gi=1695703 /ug=Mm.10919 /len=938 /STRA=rev			254.75	167.167	0.656199	0.364221		0.431796	0.365064
99811_at	109	50	100	50		55	50	50	50	50	50	132	66		Neuropeptide Y receptor Y6 /cds=(0,1115) /gb=U59430 /gi=1679633 /ug=Mm.57234 /len=1116 /STRA=for			77.25	50.8333	0.658037	0.0686917		0.854369	1.70874
96025_g_at	2584	2094	1230	2078		922	935	1649	1479	1789	1130	1640	1003		Mus musculus (clone C7/B9) S-adenosyl homocysteine hydrolase (ahcy) mRNA, complete cds /cds=(5,1303) /gb=L32836 /gi=904131 /ug=Mm.2573 /len=2057 /STRA=for			1996.5	1317.33	0.659821	0.0488964		0.502379	0.821438
103029_at	96	92	50	94		50	50	57	72	50	50	85	59		Mouse mRNA for Topoisomerase-inhibitor suppressed, complete cds /cds=(86,1495) /gb=D86344 /gi=1711237 /ug=Mm.1605 /len=2196 /STRA=for			83	54.8333	0.660643	0.0209166		0.710843	1.0241
93975_at	307	984	365	420		50	145	465	607	515	279	212	132		UI-M-BH0-ajd-f-01-0-UI.s1 Mus musculus cDNA, 3' end /clone=UI-M-BH0-ajd-f-01-0-UI /clone_end=3' /gb=AI853531 /gi=5497437 /ug=Mm.21679 /len=425 /STRA=for			519	343.5	0.66185	0.325081		0.254335	0.408478
95420_at	504	586	411	519		260	256	426	411	331	338	260	206		UI-M-BH2.3-anz-a-01-0-UI.s1 Mus musculus cDNA, 3' end /clone=UI-M-BH2.3-anz-a-01-0-UI /clone_end=3' /gb=AW120625 /gi=6095958 /ug=Mm.24365 /len=471 /STRA=for			505	337	0.667327	0.00685396		0.407921	0.514851
100486_at	122	183	70	154		50	59	91	86	72	172	84	146		Mus musculus enhancer of zeste homolog 1 (Ezh1) mRNA, complete cds /cds=(108,2351) /gb=U60453 /gi=1575340 /ug=Mm.5027 /len=3970 /STRA=for			132.25	88.3333	0.667927	0.174078		1.10397	0.635161
93838_at	86	157	138	200		50	50	153	159	122	50	151	82		UI-M-AP1-agj-c-06-0-UI.s1 Mus musculus cDNA, 3' end /clone=UI-M-AP1-agj-c-06-0-UI /clone_end=3' /gb=AI846994 /gi=5490900 /ug=Mm.21600 /len=274 /STRA=for			145.25	97.3333	0.670109	0.184758		0.564544	1.03959
102048_at	524	1780	928	1022		636	193	387	507	1487	1070	298	544		Mus musculus cardiac ankyrin repeat protein MCARP mRNA, complete cds /cds=(14,973) /gb=AF041847 /gi=2905615 /ug=Mm.10279 /len=1026 /STRA=for			1063.5	713.333	0.670741	0.306832		0.511519	0.280207
102376_r_at	200	682	731	734		435	341	305	609	412	267	786	299		Purkinje cell protein 2 (L7) /cds=(103,402) /gb=M21532 /gi=200249 /ug=Mm.1204 /len=465 /STRA=for			586.75	394.833	0.672916	0.148256		0.509587	1.33958
93027_r_at	50	50	147	50		50	50	50	50	50	50	50	50		UI-M-AP0-abg-a-02-0-UI.s1 Mus musculus cDNA, 3' end /clone=UI-M-AP0-abg-a-02-0-UI /clone_end=3' /gb=AI836214 /gi=5470427 /ug=Mm.14798 /len=164 /STRA=for			74.25	50	0.673401	0.241504		0.673401	0.673401
94004_at	474	1681	1095	595		376	606	871	739	588	708	410	765		M.musculus h2-calponin cDNA /cds=(102,1019) /gb=Z19543 /gi=51143 /ug=Mm.21776 /len=1821 /STRA=for			961.25	648	0.674122	0.216898		0.795839	0.426528
102800_at	453	677	524	546		303	298	437	446	449	296	237	277		M.musculus mRNA for mesenchyme fork head-1 protein /cds=(421,1905) /gb=X74040 /gi=1835129 /ug=Mm.14092 /len=2712 /STRA=for			550	371.5	0.675455	0.0116784		0.503636	0.430909
92456_at	93	122	50	148		50	53	56	89	92	79	135	50		M.musculus mRNA for TAFI95 /cds=(234,2744) /gb=Y09974 /gi=1850888 /ug=Mm.41977 /len=3420 /STRA=for			103.25	69.8333	0.676352	0.120583		0.484262	1.30751
95737_at	157	222	138	153		63	50	150	149	127	141	86	120		UI-M-BH2.3-aoa-b-07-0-UI.s1 Mus musculus cDNA, 3' end /clone=UI-M-BH2.3-aoa-b-07-0-UI /clone_end=3' /gb=AW120814 /gi=6096147 /ug=Mm.29750 /len=314 /STRA=for			167.5	113.333	0.676617	0.0822079		0.716418	0.513433
104170_at	50	50	50	145		50	50	50	50	50	50	50	50		Mus musculus JIP-1 (JIP-1) mRNA, complete cds /cds=(137,2119) /gb=AF003115 /gi=2316073 /ug=Mm.2720 /len=2790 /STRA=for			73.75	50	0.677966	0.241504		0.677966	0.677966
95795_at	318	367	139	236		67	101	313	283	145	172	128	129		Mus musculus Supt4h2 gene, complete cds /cds=(0,353) /gb=U96810 /gi=3779195 /ug=Mm.87825 /len=354 /STRA=for			265	180.167	0.679874	0.221289		0.486792	0.483019
98311_at	50	84	87	116		50	70	75	50	50	50	50	117		Mus musculus STAP mRNA for sperm tail associated protein, complete cds /cds=(91,3159) /gb=AB029919 /gi=5525094 /ug=Mm.42166 /len=3429 /STRA=for			84.25	57.5	0.682493	0.060338		1.38872	0.593472
98904_at	533	540	374	408		182	192	385	430	385	326	437	275		UI-M-BH1-anw-g-01-0-UI.s1 Mus musculus cDNA, 3' end /clone=UI-M-BH1-anw-g-01-0-UI /clone_end=3' /gb=AW061339 /gi=6009090 /ug=Mm.28579 /len=376 /STRA=for			463.75	316.667	0.682839	0.0495508		0.592992	0.942318
102702_at	110	91	55	67		50	50	67	50	53	61	65	50		UI-M-AH0-acy-c-09-0-UI.s1 Mus musculus cDNA, 3' end /clone=UI-M-AH0-acy-c-09-0-UI /clone_end=3' /gb=AI841487 /gi=5475700 /ug=Mm.14189 /len=476 /STRA=for			80.75	55.1667	0.683179	0.039138		0.619195	0.804954
95368_at	57	77	72	99		50	50	50	63	50	50	52	50		Mouse mRNA for plexin 2, complete cds /cds=(579,6233) /gb=D86949 /gi=1655431 /ug=Mm.2251 /len=6730 /STRA=for			76.25	52.1667	0.684153	0.0115201		0.655738	0.681967
98521_at	220	278	129	146		74	75	133	158	136	218	120	95		UI-M-AI1-afl-h-04-0-UI.s1 Mus musculus cDNA, 3' end /clone=UI-M-AI1-afl-h-04-0-UI /clone_end=3' /gb=AI847972 /gi=5491878 /ug=Mm.35808 /len=172 /STRA=for			193.25	132.333	0.684778	0.1554		0.491591	0.620957
100886_f_at	386	287	154	253		89	132	221	265	216	187	190	152		UI-M-AH0-acx-c-02-0-UI.s1 Mus musculus cDNA, 3' end /clone=UI-M-AH0-acx-c-02-0-UI /clone_end=3' /gb=AI841415 /gi=5475628 /ug=Mm.5381 /len=303 /STRA=for			270	185	0.685185	0.128154		0.562963	0.703704
104538_at	377	289	108	251		75	135	253	144	333	115	307	66		Mus musculus mRNA for prostacyclin synthase, complete cds /cds=(35,1540) /gb=AB001607 /gi=2308983 /ug=Mm.2339 /len=1665 /STRA=for			256.25	175.833	0.686179	0.260967		0.257561	1.19805
95137_at	837	820	700	655		324	388	675	619	525	575	428	288		UI-M-BH0-ajn-a-04-0-UI.s1 Mus musculus cDNA, 3' end /clone=UI-M-BH0-ajn-a-04-0-UI /clone_end=3' /gb=AI852985 /gi=5496891 /ug=Mm.29431 /len=428 /STRA=for			753	517.667	0.687472	0.0165769		0.38247	0.568393
103665_at	301	300	128	236		50	60	286	297	195	108	243	107		UI-M-BH2.2-aox-b-05-0-UI.s1 Mus musculus cDNA, 3' end /clone=UI-M-BH2.2-aox-b-05-0-UI /clone_end=3' /gb=AW122523 /gi=6098047 /ug=Mm.20697 /len=423 /STRA=for			241.25	166	0.688083	0.27821		0.443523	1.00725
93930_at	50	152	50	58		50	50	50	50	50	71	50	50		LIM and SH3 protein 1 /cds=(0,617) /gb=U58882 /gi=1407650 /ug=Mm.89941 /len=1199 /STRA=for			77.5	53.5	0.690323	0.268185		0.645161	0.645161
102268_at	143	243	211	235		66	84	115	214	134	251	163	185		UI-M-BH2.1-apb-e-05-0-UI.s1 Mus musculus cDNA, 3' end /clone=UI-M-BH2.1-apb-e-05-0-UI /clone_end=3' /gb=AW123015 /gi=6098545 /ug=Mm.1116 /len=449 /STRA=for			208	144	0.692308	0.162134		0.889423	0.783654
96426_at	3035	4010	4004	3462		2314	1545	3159	2246	2794	3039	254	1840		Prothymosin beta 4 /cds=(0,134) /gb=U38967 /gi=1072099 /ug=Mm.22566 /len=542 /STRA=for			3627.75	2516.17	0.693589	0.0149267		0.507201	0.0700159
92367_at	87	111	86	70		62	61	53	50	73	71	69	58		Mus musculus Sil mRNA, complete cds /cds=(222,4010) /gb=U36778 /gi=1173660 /ug=Mm.3988 /len=4951 /STRA=for			88.5	61.6667	0.696798	0.0111736		0.655367	0.779661
93980_at	264	504	300	297		122	162	316	322	232	274	285	168		UI-M-BH2.1-apo-f-11-0-UI.s1 Mus musculus cDNA, 3' end /clone=UI-M-BH2.1-apo-f-11-0-UI /clone_end=3' /gb=AW124520 /gi=6100050 /ug=Mm.21693 /len=511 /STRA=for			341.25	238	0.697436	0.125218		0.492308	0.835165
97819_at	2660	2895	1911	2578		947	1580	2267	2373	2128	1215	906	2832		UI-M-AK1-aes-f-05-0-UI.s1 Mus musculus cDNA, 3' end /clone=UI-M-AK1-aes-f-05-0-UI /clone_end=3' /gb=AI843119 /gi=5477332 /ug=Mm.282 /len=199 /STRA=for			2511	1751.67	0.697597	0.0592186		1.12784	0.360812
95348_at	447	365	118	245		56	131	364	469	84	129	1028	187		GRO1 oncogene /cds=(1,291) /gb=J04596 /gi=201042 /ug=Mm.21013 /len=884 /STRA=for			293.75	205.5	0.699574	0.417797		0.636596	3.49957
93804_at	88	56	59	98		66	50	50	50	50	50	50	50		UI-M-BH0-ajw-h-06-0-UI.s1 Mus musculus cDNA, 3' end /clone=UI-M-BH0-ajw-h-06-0-UI /clone_end=3' /gb=AI854156 /gi=5498062 /ug=Mm.21420 /len=517 /STRA=for			75.25	52.6667	0.699889	0.0351773		0.664452	0.664452
104257_g_at	244	50	50	55		50	50	114	88	69	50	64	50		ub73a05.r1 Mus musculus cDNA, 5' end /clone=IMAGE-1383344 /clone_end=5' /gb=AI120844 /gi=3521168 /ug=Mm.28391 /len=462 /STRA=for			99.75	70.1667	0.703425	0.484123		0.501253	0.641604
95514_at	289	449	380	224		64	205	340	245	338	224	216	194		UI-M-AK1-aez-g-04-0-UI.s1 Mus musculus cDNA, 3' end /clone=UI-M-AK1-aez-g-04-0-UI /clone_end=3' /gb=AI846302 /gi=5490208 /ug=Mm.253 /len=324 /STRA=rev			335.5	236	0.703428	0.165109		0.578241	0.643815
92538_at	50	76	217	50		69	70	50	80	65	81	71	57		Adrenergic receptor, beta 3 /cds=(182,1384) /gb=X72862 /gi=298112 /ug=Mm.4369 /len=2003 /STRA=for			98.25	69.1667	0.703986	0.392665		0.580153	0.722646
101006_at	920	493	451	480		132	391	544	627	428	354	525	462		T-complex protein 1, related sequence 1 /cds=(0,852) /gb=M35797 /gi=975268 /ug=Mm.6797 /len=1692 /STRA=for			586	412.667	0.704209	0.20008		0.788396	0.895904
99641_at	106	50	78	50		50	50	50	50	50	50	50	50		UI-M-BH2.2-aom-d-12-0-UI.s1 Mus musculus cDNA, 3' end /clone=UI-M-BH2.2-aom-d-12-0-UI /clone_end=3' /gb=AW121364 /gi=6096697 /ug=Mm.43591 /len=546 /STRA=for			71	50	0.704225	0.082826		0.704225	0.704225
102942_at	171	413	309	198		110	155	191	255	211	233	50	136		vr03g04.r1 Mus musculus cDNA, 5' end /clone=IMAGE-1110774 /clone_end=5' /gb=AA683785 /gi=2670371 /ug=Mm.1722 /len=241 /STRA=for			272.75	192.5	0.705775	0.158167		0.498625	0.183318
96757_at	50	140	50	50		50	50	50	58	50	50	50	50		UI-M-BH0-ajb-g-03-0-UI.s1 Mus musculus cDNA, 3' end /clone=UI-M-BH0-ajb-g-03-0-UI /clone_end=3' /gb=AI852165 /gi=5496071 /ug=Mm.28984 /len=389 /STRA=for			72.5	51.3333	0.708046	0.270111		0.689655	0.689655
100443_at	97	109	112	111		50	65	124	85	58	74	93	68		Branched chain aminotransferase 2, mitochondrial /cds=(135,1196) /gb=AF031467 /gi=3298578 /ug=Mm.4811 /len=1200 /STRA=for			107.25	76	0.708625	0.0533032		0.634033	0.867133
102943_at	87	165	58	50		50	55	50	128	50	50	50	142		ue37d12.y1 Mus musculus cDNA, 5' end /clone=IMAGE-1482551 /clone_end=5' /gb=AI099344 /gi=3448869 /ug=Mm.17231 /len=364 /STRA=for			90	63.8333	0.709259	0.347849		1.57778	0.555556
93736_at	178	73	145	150		75	50	50	306	50	50	53	101		Mus musculus transcobalmin II (Tcn2) mRNA, complete cds /cds=(127,1419) /gb=AF090686 /gi=3659876 /ug=Mm.20948 /len=1878 /STRA=for			136.5	96.8333	0.709402	0.494646		0.739927	0.388278
100393_at	50	99	53	188		50	50	50	50	165	50	50	50		M.musculus VIP gene /cds=(166,272) /gb=X74297 /gi=895871 /ug=Mm.89877 /len=273 /STRA=for			97.5	69.1667	0.709402	0.440968		0.512821	0.512821
101447_at	122	189	119	54		92	117	69	50	135	53	77	171		Adenomatosis polyposis coli /cds=(0,8537) /gb=M88127 /gi=191991 /ug=Mm.7883 /len=8565 /STRA=for			121	86	0.710744	0.248593		1.41322	0.636364
96618_at	91	82	96	56		50	50	59	50	88	50	50	50		UI-M-BH1-alg-f-02-0-UI.s1 Mus musculus cDNA, 3' end /clone=UI-M-BH1-alg-f-02-0-UI /clone_end=3' /gb=AW045637 /gi=5906166 /ug=Mm.27131 /len=371 /STRA=for			81.25	57.8333	0.711795	0.0558569		0.615385	0.615385
104100_at	2112	1752	1985	1928		1516	1657	1399	1444	1271	1018	1144	1272		UI-M-AK1-aex-d-02-0-UI.s1 Mus musculus cDNA, 3' end /clone=UI-M-AK1-aex-d-02-0-UI /clone_end=3' /gb=AI845915 /gi=5489821 /ug=Mm.21864 /len=208 /STRA=for			1944.25	1384.17	0.711928	0.00225289		0.654237	0.588402
94418_at	146	107	70	112		50	50	109	125	81	50	94	50		UI-M-AN0-acm-c-04-0-UI.s1 Mus musculus cDNA, 3' end /clone=UI-M-AN0-acm-c-04-0-UI /clone_end=3' /gb=AI839004 /gi=5473217 /ug=Mm.26171 /len=428 /STRA=for			108.75	77.5	0.712644	0.174254		0.45977	0.864368
96226_at	217	150	107	91		51	71	109	163	107	106	82	67		UI-M-AO0-acb-f-11-0-UI.s2 Mus musculus cDNA, 3' end /clone=UI-M-AO0-acb-f-11-0-UI /clone_end=3' /gb=AI841843 /gi=5476056 /ug=Mm.28738 /len=335 /STRA=for			141.25	101.167	0.716224	0.213419		0.474336	0.580531
101408_at	110	197	198	202		109	118	97	123	213	100	65	151		Guanidinoacetate methyltransferase /cds=(110,820) /gb=AF010499 /gi=2555082 /ug=Mm.7329 /len=939 /STRA=for			176.75	126.667	0.716643	0.114965		0.854314	0.367751
104627_at	81	148	133	78		53	50	61	86	58	165	50	50		UI-M-BH2.3-aoc-d-04-0-UI.s1 Mus musculus cDNA, 3' end /clone=UI-M-BH2.3-aoc-d-04-0-UI /clone_end=3' /gb=AW121668 /gi=6097001 /ug=Mm.24288 /len=461 /STRA=for			110	78.8333	0.716667	0.274704		0.454545	0.454545
92830_s_at	85	150	115	128		90	67	89	120	69	79	124	136		Zinc finger protein 36 /cds=(756,1307) /gb=X14678 /gi=54803 /ug=Mm.1298 /len=2282 /STRA=for			119.5	85.6667	0.716876	0.0491147		1.13808	1.03766
97533_at	82	136	243	369		266	174	112	82	112	147	250	322		Fc receptor, IgG, alpha chain transporter /cds=(26,1123) /gb=L17022 /gi=293385 /ug=Mm.3303 /len=1303 /STRA=for			207.5	148.833	0.717269	0.358885		1.55181	1.20482
97369_g_at	128	254	98	165		50	116	191	135	108	94	69	81		Mus musculus S-AKAP84 mRNA, complete cds /cds=(197,1840) /gb=U95145 /gi=2072304 /ug=Mm.2969 /len=2965 /STRA=for			161.25	115.667	0.717313	0.23871		0.502326	0.427907
92949_at	50	127	50	74		55	50	50	50	50	69	50	118		M.musculus pacsin gene /cds=(199,1524) /gb=X85124 /gi=2632077 /ug=Mm.4926 /len=4091 /STRA=for			75.25	54	0.717608	0.190818		1.56811	0.664452
95064_at	874	999	441	472		193	449	855	740	422	340	372	407		UI-M-AJ1-agz-g-06-0-UI.s1 Mus musculus cDNA, 3' end /clone=UI-M-AJ1-agz-g-06-0-UI /clone_end=3' /gb=AI849271 /gi=5493177 /ug=Mm.29165 /len=405 /STRA=rev			696.5	499.833	0.717636	0.279078		0.58435	0.534099
97500_g_at	179	305	406	178		279	230	192	169	193	87	164	198		UI-M-AH0-acs-a-10-0-UI.s1 Mus musculus cDNA, 3' end /clone=UI-M-AH0-acs-a-10-0-UI /clone_end=3' /gb=AI839950 /gi=5474163 /ug=Mm.3126 /len=361 /STRA=for			267	191.667	0.717853	0.204142		0.741573	0.614232
102021_at	210	329	141	143		50	59	232	342	123	82	79	50		Mouse interleukin-4 receptor (secreted form) mRNA, complete cds /cds=(236,928) /gb=M27960 /gi=198365 /ug=Mm.1009 /len=3697 /STRA=for			205.75	148	0.71932	0.424776		0.243013	0.383961
103941_at	50	50	112	103		50	50	50	90	50	50	50	50		Mus musculus erythroid alpha-spectrin (Spna1) mRNA, complete cds /cds=(145,7392) /gb=U87455 /gi=1841856 /ug=Mm.2528 /len=7499 /STRA=for			78.75	56.6667	0.719577	0.194948		0.634921	0.634921
104502_f_at	98	76	50	78		50	50	50	50	50	76	50	50		ma02g05.x1 Mus musculus cDNA, 3' end /clone=IMAGE-303416 /clone_end=3' /gb=AI414025 /gi=4257529 /ug=Mm.30608 /len=346 /STRA=for			75.5	54.3333	0.719647	0.0561006		0.662252	0.662252
96728_at	89	147	71	71		50	50	87	76	50	96	50	52		UI-M-AL1-ahj-f-07-0-UI.s1 Mus musculus cDNA, 3' end /clone=UI-M-AL1-ahj-f-07-0-UI /clone_end=3' /gb=AI844151 /gi=5488057 /ug=Mm.28850 /len=317 /STRA=rev			94.5	68.1667	0.72134	0.176933		0.550265	0.529101
102828_at	119	143	50	86		50	57	74	140	50	60	61	90		Murine MAP kinase kinase 6c mRNA, complete cds /cds=(431,1144) /gb=U39066 /gi=1209674 /ug=Mm.14487 /len=2015 /STRA=for			99.5	71.8333	0.721943	0.27843		0.904523	0.613065
98938_at	239	326	273	374		121	214	333	298	198	151	218	237		UI-M-BH0-ajc-a-05-0-UI.s1 Mus musculus cDNA, 3' end /clone=UI-M-BH0-ajc-a-05-0-UI /clone_end=3' /gb=AI852184 /gi=5496090 /ug=Mm.28690 /len=258 /STRA=for			303	219.167	0.723322	0.119786		0.782178	0.719472
103386_at	115	165	125	131		65	97	130	96	69	125	57	72		UI-M-BH1-alf-d-11-0-UI.s1 Mus musculus cDNA, 3' end /clone=UI-M-BH1-alf-d-11-0-UI /clone_end=3' /gb=AW046123 /gi=5906652 /ug=Mm.18641 /len=203 /STRA=for			134	97	0.723881	0.0527624		0.537313	0.425373
94537_at	1293	1363	791	1026		358	659	1336	1240	760	510	1093	1009		UI-M-AN0-ack-c-06-0-UI.s1 Mus musculus cDNA, 3' end /clone=UI-M-AN0-ack-c-06-0-UI /clone_end=3' /gb=AI838859 /gi=5473072 /ug=Mm.29057 /len=349 /STRA=for			1118.25	810.5	0.724793	0.211768		0.902303	0.97742
102925_at	64	70	68	104		50	50	53	50	50	80	50	50		vb82a12.r1 Mus musculus cDNA, 5' end /clone=IMAGE-763486 /clone_end=5' /gb=AA285446 /gi=1929668 /ug=Mm.16479 /len=415 /STRA=for			76.5	55.5	0.72549	0.0592878		0.653595	0.653595
94275_at	204	290	242	264		146	109	251	211	186	187	167	136		Uroporphyrinogen decarboxylase /cds=(281,1384) /gb=U34691 /gi=1498642 /ug=Mm.22494 /len=1454 /STRA=for			250	181.667	0.726667	0.0467295		0.544	0.668
100564_at	87	175	88	190		50	70	97	159	124	89	86	151		D-dopachrome tautomerase /cds=(0,356) /gb=AF068199 /gi=3452318 /ug=Mm.5731 /len=357 /STRA=for			135	98.1667	0.72716	0.247064		1.11852	0.637037
102315_at	650	869	479	618		220	349	667	590	502	529	638	309		UI-M-BH2.1-apt-d-08-0-UI.s1 Mus musculus cDNA, 3' end /clone=UI-M-BH2.1-apt-d-08-0-UI /clone_end=3' /gb=AW124570 /gi=6100100 /ug=Mm.10665 /len=450 /STRA=for			654	476.167	0.728084	0.129647		0.472477	0.975535
93325_at	250	398	198	270		135	146	264	288	191	195	218	165		UI-M-AQ1-aeb-b-07-0-UI.s1 Mus musculus cDNA, 3' end /clone=UI-M-AQ1-aeb-b-07-0-UI /clone_end=3' /gb=AI845735 /gi=5489641 /ug=Mm.18579 /len=362 /STRA=for			279	203.167	0.728196	0.138035		0.591398	0.781362
101291_at	240	383	205	254		110	140	215	193	302	222	190	107		M.musculus spermidine synthase pseudogene /cds=(0,894) /gb=Z83956 /gi=1781038 /ug=Mm.56916 /len=895 /STRA=for			270.5	197	0.728281	0.150189		0.395564	0.702403
102082_at	50	50	124	50		50	50	50	50	50	50	50	50		Mus musculus neuroendocrine-specific Golgi protein p55 isoform 1 (XLalphas) alternatively spliced mRNA, complete cds /cds=(255,1025) /gb=AF107847 /gi=4206781 /ug=Mm.42094 /len=1704 /STRA=for			68.5	50	0.729927	0.241504		0.729927	0.729927
98031_at	384	591	409	368		198	296	408	329	361	336	295	253		Mus musculus apoptosis activator Mtd (Mtd) mRNA, complete cds /cds=(188,829) /gb=AF027707 /gi=2689659 /ug=Mm.3295 /len=1430 /STRA=for			438	321.333	0.733638	0.0651788		0.577626	0.673516
94843_at	307	213	173	258		224	236	75	94	246	172	143	222		UI-M-BH1-ako-h-06-0-UI.s1 Mus musculus cDNA, 3' end /clone=UI-M-BH1-ako-h-06-0-UI /clone_end=3' /gb=AW045413 /gi=5905942 /ug=Mm.22884 /len=415 /STRA=for			237.75	174.5	0.733964	0.191538		0.933754	0.601472
97541_f_at	121	192	70	88		50	62	127	144	88	50	66	51		Mouse mRNA with a Set 1 repetitive element for a class I major histocompatibility complex(MHC) antigen /cds=(0,857) /gb=X00246 /gi=53085 /ug=Mm.33263 /len=1484 /STRA=rev			117.75	86.8333	0.737438	0.327862		0.433121	0.56051
99330_at	51	114	85	50		82	50	50	50	50	50	50	66		Mus musculus granulocyte-macrophage colony stimulating factor receptor low-affinity subunit mRNA, complete cds /cds=(21,1187) /gb=M85078 /gi=192594 /ug=Mm.5229 /len=1781 /STRA=for			75	55.3333	0.737778	0.192973		0.88	0.666667
92568_at	121	50	50	50		50	50	50	50	50	50	50	50		House-keeping protein 1 /cds=(87,1277) /gb=M74555 /gi=193870 /ug=Mm.103 /len=2415 /STRA=for			67.75	50	0.738007	0.241504		0.738007	0.738007
104287_at	820	904	526	706		214	294	1114	806	401	444	565	364		UI-M-BH0-ajg-h-06-0-UI.s1 Mus musculus cDNA, 3' end /clone=UI-M-BH0-ajg-h-06-0-UI /clone_end=3' /gb=AI853807 /gi=5497713 /ug=Mm.22271 /len=445 /STRA=for			739	545.5	0.73816	0.332469		0.492558	0.764547
99674_at	630	538	417	519		257	245	542	470	417	400	615	311		UI-M-BH1-amv-c-04-0-UI.s1 Mus musculus cDNA, 3' end /clone=UI-M-BH1-amv-c-04-0-UI /clone_end=3' /gb=AW060297 /gi=6008013 /ug=Mm.44174 /len=415 /STRA=for			526	388.5	0.738593	0.0821292		0.591255	1.1692
94453_at	224	119	92	99		50	70	115	146	114	97	102	118		UI-M-BH0-aiw-h-10-0-UI.s1 Mus musculus cDNA, 3' end /clone=UI-M-BH0-aiw-h-10-0-UI /clone_end=3' /gb=AI852571 /gi=5496477 /ug=Mm.28794 /len=293 /STRA=for			133.5	98.6667	0.739076	0.27866		0.883895	0.764045
95053_s_at	710	814	656	650		332	416	613	612	651	523	450	565		vq02d04.r1 Mus musculus cDNA, 5' end /clone=IMAGE-1093063 /clone_end=5' /gb=AA674669 /gi=2651906 /ug=Mm.29141 /len=414 /STRA=for			707.5	524.5	0.741343	0.033317		0.798587	0.636042
102944_at	110	369	233	157		177	134	303	139	76	138	184	153		UI-M-BH0-ajt-c-04-0-UI.s1 Mus musculus cDNA, 3' end /clone=UI-M-BH0-ajt-c-04-0-UI /clone_end=3' /gb=AI850849 /gi=5494755 /ug=Mm.1725 /len=467 /STRA=rev			217.25	161.167	0.741849	0.372894		0.704258	0.846951
98923_at	234	305	131	252		60	92	282	219	209	164	203	55		UI-M-BH0-aiu-d-07-0-UI.s1 Mus musculus cDNA, 3' end /clone=UI-M-BH0-aiu-d-07-0-UI /clone_end=3' /gb=AI852608 /gi=5496514 /ug=Mm.28630 /len=273 /STRA=for			230.5	171	0.741866	0.279892		0.238612	0.880694
102371_at	309	282	199	236		50	104	246	274	368	100	191	121		Hormone receptor /cds=(2,1807) /gb=X16995 /gi=53312 /ug=Mm.119 /len=2351 /STRA=for			256.5	190.333	0.74204	0.346719		0.471735	0.744639
100717_at	623	425	702	519		456	445	410	502	390	324	281	361		Mus musculus putative TNF-resistance related protein mRNA, complete cds /cds=(136,492) /gb=U90926 /gi=1906634 /ug=Mm.2548 /len=540 /STRA=for			567.25	421.167	0.742471	0.0338197		0.636404	0.495372
93265_at	79	111	50	234		50	50	138	154	50	86	57	50		Mouse mRNA for nonmuscle tropomyosin 5 /cds=(79,825) /gb=X53753 /gi=54911 /ug=Mm.17306 /len=1785 /STRA=for			118.5	88	0.742616	0.468491		0.421941	0.481013
97890_at	1556	2604	1433	1789		729	1063	1831	2243	1374	984	1927	1066		UI-M-BH1-akw-d-06-0-UI.s1 Mus musculus cDNA, 3' end /clone=UI-M-BH1-akw-d-06-0-UI /clone_end=3' /gb=AW046181 /gi=5906710 /ug=Mm.28405 /len=376 /STRA=for			1845.5	1370.67	0.742707	0.221381		0.577621	1.04416
96127_at	228	611	388	296		207	173	281	308	330	401	197	366		UI-M-BH1-amy-e-02-0-UI.s1 Mus musculus cDNA, 3' end /clone=UI-M-BH1-amy-e-02-0-UI /clone_end=3' /gb=AW048730 /gi=5909259 /ug=Mm.28119 /len=536 /STRA=for			380.75	283.333	0.744145	0.249595		0.961261	0.5174
94838_r_at	254	409	286	175		77	199	231	334	196	219	264	202		Proliferin /cds=(4,678) /gb=K02245 /gi=200400 /ug=Mm.22777 /len=790 /STRA=for			281	209.333	0.744958	0.243738		0.718861	0.939502
94871_r_at	149	149	93	100		50	99	107	147	80	66	71	89		UI-M-BH2.1-aph-d-10-0-UI.s1 Mus musculus cDNA, 3' end /clone=UI-M-BH2.1-aph-d-10-0-UI /clone_end=3' /gb=AW124226 /gi=6099756 /ug=Mm.23755 /len=382 /STRA=for			122.75	91.5	0.745418	0.179433		0.725051	0.578411
98887_at	236	489	424	383		50	315	384	359	255	352	279	336		UI-M-BH2.2-aqj-f-06-0-UI.s1 Mus musculus cDNA, 3' end /clone=UI-M-BH2.2-aqj-f-06-0-UI /clone_end=3' /gb=AW125607 /gi=6101137 /ug=Mm.28538 /len=461 /STRA=for			383	285.833	0.746301	0.237709		0.877285	0.72846
98436_s_at	206	324	146	185		50	108	319	154	153	181	197	76		Caspase 3, apoptosis related cysteine protease /cds=(15,848) /gb=U54803 /gi=1518967 /ug=Mm.34405 /len=1418 /STRA=rev			215.25	160.833	0.747193	0.352033		0.353078	0.915215
97249_at	110	346	234	269		116	177	307	276	50	149	106	209		UI-M-BH2.1-aph-b-11-0-UI.s1 Mus musculus cDNA, 3' end /clone=UI-M-BH2.1-aph-b-11-0-UI /clone_end=3' /gb=AW124204 /gi=6099734 /ug=Mm.27853 /len=382 /STRA=for			239.75	179.167	0.747306	0.364733		0.871741	0.442127
101395_at	64	90	128	113		93	63	64	77	53	93	98	106		UI-M-BH2.3-anz-a-02-0-UI.s1 Mus musculus cDNA, 3' end /clone=UI-M-BH2.3-anz-a-02-0-UI /clone_end=3' /gb=AW120626 /gi=6095959 /ug=Mm.7219 /len=318 /STRA=for			98.75	73.8333	0.747679	0.111865		1.07342	0.992405
104293_at	203	331	175	170		194	50	211	173	102	256	50	149		uc01f05.r1 Mus musculus cDNA, 5' end /clone=IMAGE-1396737 /clone_end=5' /gb=AI882440 /gi=5567529 /ug=Mm.22306 /len=271 /STRA=for			219.75	164.333	0.747819	0.288534		0.678043	0.227531
97447_at	70	216	151	139		60	88	117	172	160	50	65	229		UI-M-AJ0-aax-d-11-0-UI.s1 Mus musculus cDNA, 3' end /clone=UI-M-AJ0-aax-d-11-0-UI /clone_end=3' /gb=AI836718 /gi=5470931 /ug=Mm.30244 /len=276 /STRA=for			144	107.833	0.748843	0.333241		1.59028	0.451389
92710_at	56	111	50	50		50	50	50	50	50	50	50	50		Mus musculus Rho-guanine nucleotide exchange factor mRNA, complete cds /cds=(104,5185) /gb=U73199 /gi=1657834 /ug=Mm.4620 /len=5405 /STRA=for			66.75	50	0.749064	0.190624		0.749064	0.749064
100064_f_at	1222	1432	1133	1258		629	543	1126	1210	1320	850	922	666		Mus musculus connexin 43 (alpha-1 gap junction) mRNA, complete cds /cds=(220,1368) /gb=M63801 /gi=191773 /ug=Mm.4504 /len=1408 /STRA=for			1261.25	946.333	0.750314	0.102742		0.528048	0.731021
101997_at	382	585	256	270		122	50	458	557	366	128	376	65		UI-M-BH0-aki-h-11-0-UI.s1 Mus musculus cDNA, 3' end /clone=UI-M-BH0-aki-h-11-0-UI /clone_end=3' /gb=AI851598 /gi=5495504 /ug=Mm.9852 /len=540 /STRA=for			373.25	280.167	0.750614	0.467622		0.174146	1.00737
98527_at	199	237	196	229		50	88	307	311	166	50	80	90		M.musculus gene for dodecenoyl-CoA delta-isomerase, exons 1 and 2 /cds=(0,869) /gb=Z14050 /gi=414903 /ug=Mm.35833 /len=870 /STRA=for			215.25	162	0.752613	0.419292		0.418118	0.371661
104085_at	151	103	51	116		54	50	113	62	111	86	107	177		UI-M-BH0-aiz-g-04-0-UI.s1 Mus musculus cDNA, 3' end /clone=UI-M-BH0-aiz-g-04-0-UI /clone_end=3' /gb=AI852970 /gi=5496876 /ug=Mm.21787 /len=390 /STRA=for			105.25	79.3333	0.753761	0.268967		1.68171	1.01663
93586_at	286	411	284	318		148	207	370	372	180	192	205	196		Mus musculus mRNA for synaptogyrin 2 /cds=(4,678) /gb=AJ002307 /gi=2959869 /ug=Mm.2079 /len=1512 /STRA=for			324.75	244.833	0.753913	0.191651		0.603541	0.631255
99082_at	724	731	413	696		309	396	693	451	656	399	497	448		Mus musculus FKBP65 binding protein mRNA, complete cds /cds=(93,1838) /gb=L07063 /gi=894161 /ug=Mm.3894 /len=2597 /STRA=for			641	484	0.75507	0.153111		0.698908	0.775351
102135_at	73	50	72	159		101	72	50	78	50	50	51	102		C78893 Mus musculus cDNA, 3' end /clone=J0057A02 /clone_end=3' /gb=C78893 /gi=2519223 /ug=Mm.43904 /len=601 /STRA=rev			88.5	66.8333	0.755179	0.349616		1.15254	0.576271
96921_at	105	163	60	101		50	50	153	133	50	50	50	50		UI-M-BH1-anu-d-07-0-UI.s1 Mus musculus cDNA, 3' end /clone=UI-M-BH1-anu-d-07-0-UI /clone_end=3' /gb=AW060765 /gi=6008516 /ug=Mm.30157 /len=492 /STRA=for			107.25	81	0.755245	0.404946		0.4662	0.4662
99642_i_at	1169	1231	857	755		436	660	720	723	1033	981	528	704		Mouse mRNA for carboxypeptidase H /cds=(39,1472) /gb=X61232 /gi=50312 /ug=Mm.43603 /len=1992 /STRA=for			1003	758.833	0.756564	0.130689		0.701894	0.526421
104619_at	177	174	122	86		133	104	136	114	59	89	88	107		UI-M-AP0-abg-d-07-0-UI.s3 Mus musculus cDNA, 3' end /clone=UI-M-AP0-abg-d-07-0-UI /clone_end=3' /gb=AI840424 /gi=5474637 /ug=Mm.24222 /len=483 /STRA=for			139.75	105.833	0.757305	0.17477		0.765653	0.629696
104610_at	96	130	76	72		50	72	81	90	74	59	168	50		UI-M-BH1-amm-a-01-0-UI.s1 Mus musculus cDNA, 3' end /clone=UI-M-BH1-amm-a-01-0-UI /clone_end=3' /gb=AW050015 /gi=5910544 /ug=Mm.2415 /len=503 /STRA=rev			93.5	71	0.759358	0.117693		0.534759	1.79679
104528_at	103	167	104	50		50	50	153	130	50	50	81	50		uc59h04.r1 Mus musculus cDNA, 5' end /clone=IMAGE-1429975 /clone_end=5' /gb=AI181549 /gi=3732187 /ug=Mm.2310 /len=435 /STRA=for			106	80.5	0.759434	0.43273		0.471698	0.764151
104164_at	50	89	104	50		50	50	84	50	50	50	52	50		ub94b03.r1 Mus musculus cDNA, 5' end /clone=IMAGE-1396109 /clone_end=5' /gb=AI181257 /gi=3731895 /ug=Mm.27139 /len=510 /STRA=for			73.25	55.6667	0.759954	0.212752		0.682594	0.709898
104339_at	89	50	59	145		50	81	101	59	50	50	50	80		UI-M-BH1-amu-h-09-0-UI.s1 Mus musculus cDNA, 3' end /clone=UI-M-BH1-amu-h-09-0-UI /clone_end=3' /gb=AW060236 /gi=6007987 /ug=Mm.22521 /len=238 /STRA=for			85.75	65.1667	0.759961	0.336382		0.932945	0.58309
103817_at	798	1612	846	1125		761	517	734	218	1539	1230	1378	851		Mus musculus mRNA for cartilage-associated protein (CASP) /cds=(71,1273) /gb=AJ006469 /gi=3687319 /ug=Mm.20904 /len=1685 /STRA=for			1095.25	833.167	0.760709	0.385832		0.776992	1.25816
104006_at	117	164	105	58		50	50	55	50	133	169	50	50		Mus musculus eps15 mRNA, complete cds /cds=(110,2803) /gb=L21768 /gi=404756 /ug=Mm.267 /len=3033 /STRA=for			111	84.5	0.761261	0.431189		0.45045	0.45045
98635_at	593	572	307	380		251	244	511	453	282	375	302	201		UI-M-BH0-ake-e-11-0-UI.s1 Mus musculus cDNA, 3' end /clone=UI-M-BH0-ake-e-11-0-UI /clone_end=3' /gb=AI854629 /gi=5498535 /ug=Mm.38802 /len=492 /STRA=for			463	352.667	0.761699	0.205002		0.434125	0.652268
92335_at	114	50	70	74		50	98	50	51	53	50	50	50		Latent transforming growth factor beta binding protein 2 /cds=(242,5743) /gb=AF004874 /gi=2213908 /ug=Mm.3900 /len=6807 /STRA=for			77	58.6667	0.761905	0.240756		0.649351	0.649351
95491_at	794	911	602	724		337	382	651	599	808	698	637	529		Mus musculus gene for DJ-1, complete cds /cds=(0,521) /gb=AB015652 /gi=3256342 /ug=Mm.2507 /len=522 /STRA=for			757.75	579.167	0.764324	0.133619		0.698119	0.840647
99644_at	372	442	294	305		151	133	452	396	251	238	233	240		UI-M-AO1-aeg-e-11-0-UI.s1 Mus musculus cDNA, 3' end /clone=UI-M-AO1-aeg-e-11-0-UI /clone_end=3' /gb=AI845855 /gi=5489761 /ug=Mm.43636 /len=407 /STRA=for			353.25	270.167	0.764803	0.276964		0.679406	0.65959
102781_at	274	439	331	306		170	157	299	373	287	264	268	210		Mus musculus Paneth cell enhanced expression PCEE mRNA, complete cds /cds=(110,670) /gb=U37351 /gi=1276644 /ug=Mm.13725 /len=1220 /STRA=for			337.5	258.333	0.765432	0.156085		0.622222	0.794074
102750_at	121	313	252	244		114	183	199	199	138	235	216	203		Mus musculus X11gamma protein mRNA, complete cds /cds=(218,1933) /gb=AF070975 /gi=3264793 /ug=Mm.12909 /len=2039 /STRA=for			232.5	178	0.765591	0.200331		0.873118	0.929032
99849_at	3066	5473	3782	4068		1473	1524	2661	4449	5295	3458	1469	1565		C85523 Mus musculus cDNA, 3' end /clone=J0209F01 /clone_end=3' /gb=C85523 /gi=2917480 /ug=Mm.63525 /len=566 /STRA=rev			4097.25	3143.33	0.767181	0.31397		0.381964	0.358533
102727_at	1158	1517	1592	1043		998	603	954	912	1413	1233	608	844		Brain derived neurotrophic factor /cds=(77,826) /gb=X55573 /gi=287898 /ug=Mm.1442 /len=927 /STRA=for			1327.5	1018.83	0.767483	0.120449		0.635782	0.458004
98770_at	50	122	50	95		50	50	70	50	73	72	103	74		Mus musculus centromere protein C (Cenp-c) gene, promoter region and partial cds /cds=(142,159) /gb=AF012708 /gi=2465200 /ug=Mm.4649 /len=160 /STRA=for			79.25	60.8333	0.767613	0.263162		0.933754	1.29968
93533_at	156	363	179	160		72	80	251	186	233	166	86	114		UI-M-BH0-ajq-b-03-0-UI.s1 Mus musculus cDNA, 3' end /clone=UI-M-BH0-ajq-b-03-0-UI /clone_end=3' /gb=AI853651 /gi=5497557 /ug=Mm.1985 /len=445 /STRA=for			214.5	164.667	0.767677	0.391222		0.531469	0.400932
104266_at	114	110	157	80		89	160	90	50	92	50	150	137		UI-M-AK1-aev-f-07-0-UI.s1 Mus musculus cDNA, 3' end /clone=UI-M-AK1-aev-f-07-0-UI /clone_end=3' /gb=AI847795 /gi=5491701 /ug=Mm.28530 /len=269 /STRA=for			115.25	88.5	0.767896	0.298346		1.18872	1.30152
102871_at	66	50	92	52		50	50	50	50	50	50	85	110		Mus musculus MEP mRNA, complete cds /cds=(202,3246) /gb=L77867 /gi=1911182 /ug=Mm.1480 /len=3464 /STRA=for			65	50	0.769231	0.0855967		1.69231	1.30769
93596_i_at	246	234	274	311		215	191	225	181	236	181	306	346		vn82e11.r1 Mus musculus cDNA, 5' end /clone=IMAGE-1038476 /clone_end=5' /gb=AA624586 /gi=2528462 /ug=Mm.20841 /len=178 /STRA=for			266.25	204.833	0.769327	0.00957437		1.29953	1.1493
93698_at	240	576	526	361		226	259	363	440	216	462	146	206		Mus musculus mSox13 mRNA, complete cds /cds=(48,1835) /gb=AB006329 /gi=3077735 /ug=Mm.8575 /len=3183 /STRA=rev			425.75	327.667	0.769622	0.268699		0.483852	0.342924
101430_at	263	211	274	292		191	142	227	210	265	166	195	180		UI-M-BH2.1-apr-f-10-0-UI.s1 Mus musculus cDNA, 3' end /clone=UI-M-BH2.1-apr-f-10-0-UI /clone_end=3' /gb=AW124153 /gi=6099683 /ug=Mm.7556 /len=219 /STRA=for			260	200.167	0.769872	0.0525075		0.692308	0.75
96416_f_at	1272	1301	793	1106		537	574	1143	1148	900	866	1019	714		Histone gene complex 1 /cds=(0,176) /gb=Z30939 /gi=496636 /ug=Mm.88398 /len=287 /STRA=for			1118	861.333	0.770423	0.155271		0.63864	0.911449
103907_at	50	122	50	64		50	50	50	52	63	66	50	50		um31a04.x1 Mus musculus cDNA, 3' end /clone=IMAGE-2236110 /clone_end=3' /gb=AW108492 /gi=6079292 /ug=Mm.21401 /len=660 /STRA=for			71.5	55.1667	0.771562	0.2791		0.699301	0.699301
101299_at	81	236	257	208		157	85	141	110	192	221	151	93		Mouse MHC class I H2-Qa-Mb1 gene, complete cds /cds=(0,1034) /gb=M20985 /gi=199605 /ug=Mm.56928 /len=1035 /STRA=for			195.5	151	0.772379	0.303477		0.475703	0.772379
104121_at	146	151	110	191		123	215	93	69	125	68	149	231		Junction plakoglobin /cds=(0,1865) /gb=M90365 /gi=1389681 /ug=Mm.21990 /len=1878 /STRA=rev			149.5	115.5	0.772575	0.302408		1.54515	0.996656
103606_r_at	671	585	398	590		270	333	486	486	522	504	516	354		UI-M-BH2.2-aon-c-10-0-UI.s1 Mus musculus cDNA, 3' end /clone=UI-M-BH2.2-aon-c-10-0-UI /clone_end=3' /gb=AW121438 /gi=6096771 /ug=Mm.20156 /len=269 /STRA=for			561	433.5	0.772727	0.107831		0.631016	0.919786
94056_at	1006	1081	453	929		194	394	885	834	1031	685	883	521		Stearoyl-coenzyme A desaturase 1 /cds=(0,1067) /gb=M21285 /gi=200949 /ug=Mm.22026 /len=1068 /STRA=for			867.25	670.5	0.773133	0.347672		0.600749	1.01816
100011_at	229	170	248	182		184	106	168	147	157	200	170	170		UI-M-BH0-ain-f-03-0-UI.s1 Mus musculus cDNA, 3' end /clone=UI-M-BH0-ain-f-03-0-UI /clone_end=3' /gb=AI851658 /gi=5495564 /ug=Mm.4549 /len=448 /STRA=for			207.25	160.333	0.773623	0.0678658		0.820265	0.820265
104156_r_at	50	108	50	60		50	59	52	50	50	50	50	50		Mus musculus transcription factor LRG-21 mRNA, complete cds /cds=(167,712) /gb=U19118 /gi=633751 /ug=Mm.2706 /len=1897 /STRA=for			67	51.8333	0.773632	0.209616		0.746269	0.746269
99866_at	56	99	113	61		51	53	56	60	50	112	55	58		vt02g03.x1 Mus musculus cDNA, 3' end /clone=IMAGE-1161940 /clone_end=3' /gb=AI642417 /gi=4720892 /ug=Mm.7202 /len=320 /STRA=for			82.25	63.6667	0.774063	0.293084		0.705167	0.668693
93525_f_at	179	160	178	186		122	93	218	114	146	124	120	114		UI-M-AN0-acj-h-05-0-UI.s1 Mus musculus cDNA, 3' end /clone=UI-M-AN0-acj-h-05-0-UI /clone_end=3' /gb=AI839376 /gi=5473589 /ug=Mm.1971 /len=384 /STRA=for			175.75	136.167	0.774775	0.118913		0.648649	0.682788
103369_at	91	150	54	161		50	50	58	154	50	168	50	137		UI-M-BH1-amq-b-11-0-UI.s1 Mus musculus cDNA, 3' end /clone=UI-M-BH1-amq-b-11-0-UI /clone_end=3' /gb=AW049142 /gi=5909671 /ug=Mm.18538 /len=446 /STRA=rev			114	88.3333	0.774854	0.485197		1.20175	0.438596
92920_at	50	50	87	98		50	66	50	57	59	50	60	151		Mus musculus Ptx1 mRNA, complete cds /cds=(485,1432) /gb=U71206 /gi=1616804 /ug=Mm.4832 /len=2463 /STRA=for			71.25	55.3333	0.776608	0.164922		2.1193	0.842105
96278_at	437	407	302	326		184	214	352	364	346	255	180	331		UI-M-AN1-aff-h-09-0-UI.s1 Mus musculus cDNA, 3' end /clone=UI-M-AN1-aff-h-09-0-UI /clone_end=3' /gb=AI846553 /gi=5490459 /ug=Mm.29865 /len=300 /STRA=for			368	285.833	0.776721	0.120697		0.899457	0.48913
103442_at	241	269	200	253		117	132	257	263	190	163	180	126		UI-M-AQ1-adz-g-11-0-UI.s1 Mus musculus cDNA, 3' end /clone=UI-M-AQ1-adz-g-11-0-UI /clone_end=3' /gb=AI843399 /gi=5477612 /ug=Mm.21475 /len=471 /STRA=for			240.75	187	0.776739	0.149303		0.523364	0.747664
93769_at	119	274	221	191		191	197	102	63	130	255	84	201		UI-M-AO0-acf-a-02-0-UI.s1 Mus musculus cDNA, 3' end /clone=UI-M-AO0-acf-a-02-0-UI /clone_end=3' /gb=AI838708 /gi=5472921 /ug=Mm.21187 /len=263 /STRA=for			201.25	156.333	0.776812	0.339213		0.998758	0.417391
99502_at	80	50	70	78		50	50	55	69	50	50	118	56		Mus musculus transcription factor BFCOL1 mRNA, complete cds /cds=(86,2395) /gb=U80078 /gi=1724123 /ug=Mm.417 /len=2426 /STRA=for			69.5	54	0.776978	0.0485047		0.805755	1.69784
103927_at	50	91	105	50		55	75	65	50	50	50	58	120		uo10c08.x1 Mus musculus cDNA, 3' end /clone=IMAGE-2599118 /clone_end=3' /gb=AW212672 /gi=6518785 /ug=Mm.25086 /len=154 /STRA=for			74	57.5	0.777027	0.219081		1.62162	0.783784
92703_at	98	60	93	104		50	50	93	50	79	92	96	50		mn19e09.y1 Mus musculus cDNA, 5' end /clone=IMAGE-538408 /clone_end=5' /gb=AI325791 /gi=4060220 /ug=Mm.45992 /len=434 /STRA=for			88.75	69	0.777465	0.17892		0.56338	1.08169
93635_at	50	181	50	50		50	50	50	50	137	50	54	50		Kinesin family member 3c /cds=(425,2815) /gb=AF013116 /gi=2795865 /ug=Mm.7688 /len=4017 /STRA=for			82.75	64.5	0.779456	0.579524		0.60423	0.652568
103335_at	170	290	218	67		233	204	50	99	86	200	128	139		Mus musculus beta-galactoside binding lectin mRNA, complete cds /cds=(34,1002) /gb=U55060 /gi=1916601 /ug=Mm.18087 /len=1418 /STRA=for			186.25	145.333	0.780313	0.467027		0.746309	0.687248
97874_at	200	287	287	196		179	180	163	264	187	163	166	217		UI-M-BH0-ajr-f-07-0-UI.s1 Mus musculus cDNA, 3' end /clone=UI-M-BH0-ajr-f-07-0-UI /clone_end=3' /gb=AI853863 /gi=5497769 /ug=Mm.28349 /len=440 /STRA=for			242.5	189.333	0.780756	0.0944835		0.894845	0.684536
92231_at	151	167	108	140		108	99	79	86	137	154	50	83		Mouse mRNA for NBL4, complete cds /cds=(51,1715) /gb=D28818 /gi=466547 /ug=Mm.3465 /len=2487 /STRA=for			141.5	110.5	0.780919	0.122544		0.586572	0.353357
98021_at	54	76	79	71		50	50	72	56	50	50	50	50		Mouse mRNA for RNA polymerase I associated factor (PAF53), complete cds /cds=(26,1330) /gb=D14336 /gi=1381028 /ug=Mm.3253 /len=1594 /STRA=for			70	54.6667	0.780952	0.0410859		0.714286	0.714286
95539_at	167	237	169	208		121	113	140	188	178	175	109	127		vv95e03.r1 Mus musculus cDNA, 5' end /clone=IMAGE-1230172 /clone_end=5' /gb=AA798971 /gi=2861926 /ug=Mm.27668 /len=449 /STRA=for			195.25	152.5	0.78105	0.0769043		0.650448	0.558259
101773_r_at	50	84	72	50		50	50	50	50	50	50	50	50		Mus musculus CNR8 mRNA for Cadherin-related neural recepter 8, partial cds /cds=(0,2742) /gb=AB008183 /gi=3253088 /ug=Mm.57105 /len=2743 /STRA=for			64	50	0.78125	0.0692894		0.78125	0.78125
97579_f_at	61	82	50	79		50	62	50	57	50	50	83	50		Mus musculus CrygF gene, exons 2 and 3, intron B and partial CDS /cds=(0,354) /gb=AJ224343 /gi=3766474 /ug=Mm.89477 /len=355 /STRA=for			68	53.1667	0.781863	0.0532331		0.735294	1.22059
104662_at	50	112	54	123		50	62	60	86	64	76	66	50		Mus musculus glucocorticoid induced TNFR family related protein precursor, mRNA, complete cds /cds=(45,731) /gb=U82534 /gi=2228583 /ug=Mm.3180 /len=1020 /STRA=for			84.75	66.3333	0.782694	0.294283		0.589971	0.778761
100738_at	75	50	75	55		50	50	50	50	50	50	85	50		Mus musculus serine proteinase inhibitor mBM2A mRNA, complete cds /cds=(0,564) /gb=U96701 /gi=2104736 /ug=Mm.3517 /len=1038 /STRA=for			63.75	50	0.784314	0.0294701		0.784314	1.33333
96855_at	477	677	467	498		231	210	583	490	549	430	439	415		UI-M-AH0-acs-a-04-0-UI.s1 Mus musculus cDNA, 3' end /clone=UI-M-AH0-acs-a-04-0-UI /clone_end=3' /gb=AI839946 /gi=5474159 /ug=Mm.30043 /len=255 /STRA=for			529.75	415.5	0.784332	0.242442		0.783388	0.828693
96335_at	328	397	155	415		238	229	367	256	203	231	274	219		ub83a04.r1 Mus musculus cDNA, 5' end /clone=IMAGE-1395054 /clone_end=5' /gb=AI181308 /gi=3731946 /ug=Mm.29974 /len=394 /STRA=for			323.75	254	0.784556	0.243672		0.676448	0.846332
104702_at	116	68	50	60		50	50	50	80	66	50	50	50		vp87e06.x1 Mus musculus cDNA, 3' end /clone=IMAGE-1091746 /clone_end=3' /gb=AI505152 /gi=4403003 /ug=Mm.2437 /len=327 /STRA=for			73.5	57.6667	0.78458	0.266551		0.680272	0.680272
102056_f_at	179	246	132	169		85	75	180	212	146	157	130	77		vw48g12.r1 Mus musculus cDNA, 5' end /clone=IMAGE-1247110 /clone_end=5' /gb=AA839379 /gi=2915474 /ug=Mm.10374 /len=500 /STRA=for			181.5	142.5	0.785124	0.273174		0.424242	0.716253
94561_at	518	1434	641	456		245	268	857	946	653	628	639	471		UI-M-AQ0-aai-b-09-0-UI.s2 Mus musculus cDNA, 3' end /clone=UI-M-AQ0-aai-b-09-0-UI /clone_end=3' /gb=AI836140 /gi=5470353 /ug=Mm.29107 /len=498 /STRA=for			762.25	599.5	0.786487	0.505187		0.617908	0.838308
101097_at	335	583	216	335		134	159	457	459	236	292	312	179		UI-M-BH2.3-aok-a-03-0-UI.s1 Mus musculus cDNA, 3' end /clone=UI-M-BH2.3-aok-a-03-0-UI /clone_end=3' /gb=AW121176 /gi=6096509 /ug=Mm.74084 /len=435 /STRA=for			367.25	289.5	0.788291	0.435654		0.487406	0.849558
97506_at	110	146	80	100		70	56	93	85	91	121	172	50		uc87a04.x1 Mus musculus cDNA, 3' end /clone=IMAGE-1432590 /clone_end=3' /gb=AI043016 /gi=3286276 /ug=Mm.31512 /len=532 /STRA=for			109	86	0.788991	0.181724		0.458716	1.57798
96325_at	100	214	120	148		85	51	113	143	149	148	87	50		UI-M-BH2.1-apu-b-08-0-UI.s1 Mus musculus cDNA, 3' end /clone=UI-M-BH2.1-apu-b-08-0-UI /clone_end=3' /gb=AW124874 /gi=6100404 /ug=Mm.29949 /len=429 /STRA=for			145.5	114.833	0.789233	0.311144		0.343643	0.597938
97241_at	446	561	266	418		186	253	369	379	463	352	487	363		ul21f04.y1 Mus musculus cDNA, 5' end /clone=IMAGE-2088223 /clone_end=5' /gb=AI787713 /gi=5335420 /ug=Mm.27839 /len=526 /STRA=for			422.75	333.667	0.789277	0.236246		0.858664	1.15198
100554_at	736	649	765	664		702	213	430	296	760	931	209	205		Mus musculus carboxyl terminal LIM domain protein (Ldb3) mRNA, complete cds /cds=(60,1040) /gb=AF053367 /gi=2996195 /ug=Mm.5567 /len=1256 /STRA=for			703.5	555.333	0.789386	0.342531		0.2914	0.297086
92625_at	4488	4657	2942	4269		1942	2686	3902	4224	3285	3338	2449	2944		M.musculus mRNA for nucleoside diphoshate kinase B /cds=(19,477) /gb=X68193 /gi=53353 /ug=Mm.1125 /len=612 /STRA=for			4089	3229.5	0.789802	0.138506		0.71998	0.598924
101503_at	50	159	62	70		50	50	61	50	88	105	50	50		M.musculus mRNA for Ulip protein /cds=(309,2021) /gb=X87817 /gi=861058 /ug=Mm.8180 /len=2076 /STRA=for			85.25	67.3333	0.789834	0.46022		0.58651	0.58651
104598_at	650	943	1073	824		638	592	552	711	777	866	404	582		Mouse mRNA for a growth factor-inducible immediate early gene (3CH134) /cds=(139,1242) /gb=X61940 /gi=49735 /ug=Mm.2404 /len=1933 /STRA=for			872.5	689.333	0.790067	0.0854135		0.667049	0.463037
104306_at	168	231	123	169		91	73	234	173	148	100	134	134		UI-M-AM1-afu-g-07-0-UI.s1 Mus musculus cDNA, 3' end /clone=UI-M-AM1-afu-g-07-0-UI /clone_end=3' /gb=AI847886 /gi=5491792 /ug=Mm.22369 /len=392 /STRA=for			172.75	136.5	0.790159	0.338142		0.775687	0.775687
94396_at	372	372	324	332		202	241	336	314	333	234	423	193		vq78d10.s1 Mus musculus cDNA, 5' end /clone=IMAGE-1108435 /clone_end=5' /gb=AA647507 /gi=2573936 /ug=Mm.25709 /len=345 /STRA=for			350	276.667	0.790476	0.0468026		0.551429	1.20857
99429_at	50	50	58	158		59	66	71	54	75	50	56	85		Murine Ig-related lambda(5) gene (exon 3) transcibed selectively in pre-B-lymphocytes /cds=(0,316) /gb=X04770 /gi=52411 /ug=Mm.57133 /len=465 /STRA=for			79	62.5	0.791139	0.464141		1.07595	0.708861
98083_at	367	519	328	416		261	213	335	295	394	437	261	233		UI-M-BH1-amp-g-08-0-UI.s1 Mus musculus cDNA, 3' end /clone=UI-M-BH1-amp-g-08-0-UI /clone_end=3' /gb=AW049031 /gi=5909560 /ug=Mm.34576 /len=473 /STRA=for			407.5	322.5	0.791411	0.152128		0.571779	0.640491
99166_at	472	209	320	313		254	157	301	229	294	325	128	250		UI-M-AP1-agl-a-09-0-UI.s1 Mus musculus cDNA, 3' end /clone=UI-M-AP1-agl-a-09-0-UI /clone_end=3' /gb=AI845963 /gi=5489869 /ug=Mm.41683 /len=223 /STRA=for			328.5	260	0.791476	0.231964		0.761035	0.38965
99675_at	318	512	280	389		198	222	428	357	344	233	204	295		UI-M-AN0-acq-e-09-0-UI.s1 Mus musculus cDNA, 3' end /clone=UI-M-AN0-acq-e-09-0-UI /clone_end=3' /gb=AI839766 /gi=5474019 /ug=Mm.44202 /len=366 /STRA=for			374.75	297	0.792528	0.245015		0.787191	0.544363
95726_at	747	919	744	761		454	438	823	838	590	629	670	552		UI-M-BH2.3-any-b-09-0-UI.s1 Mus musculus cDNA, 3' end /clone=UI-M-BH2.3-any-b-09-0-UI /clone_end=3' /gb=AW120733 /gi=6096066 /ug=Mm.29737 /len=318 /STRA=for			792.75	628.667	0.79302	0.120622		0.69631	0.845159
103957_at	92	148	62	50		50	50	115	92	62	50	53	50		M.musculus mRNA for transferrin receptor /cds=(0,2291) /gb=X57349 /gi=54914 /ug=Mm.25560 /len=2292 /STRA=for			88	69.8333	0.793561	0.437945		0.568182	0.602273
100381_at	50	50	102	50		50	50	50	50	50	50	50	50		Actin, alpha 1, skeletal muscle /cds=(70,1203) /gb=M12347 /gi=191572 /ug=Mm.89137 /len=1446 /STRA=for			63	50	0.793651	0.241504		0.793651	0.793651
97998_at	205	249	263	168		118	123	249	151	186	227	200	157		Mouse chromosome 6 BAC-284H12 (Research Genetics mouse BAC library) complete sequence /cds=(215,3742) /gb=AC002397 /gi=3287367 /ug=Mm.3172 /len=4271 /STRA=for			221.25	175.667	0.793974	0.199929		0.709605	0.903955
98876_at	466	571	247	468		50	257	644	456	416	265	531	188		UI-M-BH0-ajw-h-10-0-UI.s1 Mus musculus cDNA, 3' end /clone=UI-M-BH0-ajw-h-10-0-UI /clone_end=3' /gb=AI854160 /gi=5498066 /ug=Mm.28494 /len=521 /STRA=for			438	348	0.794521	0.4646		0.429224	1.21233
95446_at	1535	1280	925	1360		800	700	1189	1012	1283	1095	1092	805		UI-M-BH1-ami-f-05-0-UI.s2 Mus musculus cDNA, 3' end /clone=UI-M-BH1-ami-f-05-0-UI /clone_end=3' /gb=AW120502 /gi=6095835 /ug=Mm.24600 /len=199 /STRA=for			1275	1013.17	0.794641	0.126047		0.631373	0.856471
96070_at	1226	1311	1548	1330		1059	1344	1341	1096	850	767	801	1130		Mouse mRNA for profilin /cds=(59,481) /gb=X14425 /gi=53781 /ug=Mm.2647 /len=756 /STRA=for			1353.75	1076.17	0.794952	0.0723902		0.834718	0.59169
101029_f_at	455	1066	481	355		424	402	455	678	396	456	348	401		Actin, alpha, cardiac /cds=(0,1127) /gb=M15501 /gi=191653 /ug=Mm.686 /len=1226 /STRA=for			589.25	468.5	0.795078	0.408388		0.680526	0.590581
94269_at	609	1222	1384	1099		631	875	1118	1034	759	728	601	1149		Mus musculus rab6/rab5-associated protein (rab6) mRNA, partial cds /cds=(0,307) /gb=L40934 /gi=722666 /ug=Mm.22473 /len=308 /STRA=for			1078.5	857.5	0.795086	0.212888		1.06537	0.557255
96907_at	52	153	50	50		50	50	79	85	50	50	94	50		UI-M-BH2.2-aqm-h-04-0-UI.s1 Mus musculus cDNA, 3' end /clone=UI-M-BH2.2-aqm-h-04-0-UI /clone_end=3' /gb=AW125538 /gi=6101068 /ug=Mm.30136 /len=241 /STRA=for			76.25	60.6667	0.795628	0.497668		0.655738	1.23279
101700_at	78	175	157	181		152	50	60	177	178	89	208	311		Mouse Sp5 mRNA containing period repeat /cds=(153,440) /gb=X12806 /gi=53649 /ug=Mm.41972 /len=1403 /STRA=for			147.75	117.667	0.79639	0.418305		2.10491	1.40778
104513_at	315	391	272	463		138	177	363	388	364	293	359	187		vs04f09.r1 Mus musculus cDNA, 5' end /clone=IMAGE-1137257 /clone_end=5' /gb=AA688938 /gi=2678367 /ug=Mm.3090 /len=197 /STRA=for			360.25	287.167	0.797132	0.28347		0.519084	0.99653
94963_at	1095	2726	1081	869		557	845	1403	1155	1593	1348	546	685		ub70b01.x1 Mus musculus cDNA, 3' end /clone=IMAGE-1383049 /clone_end=3' /gb=AI462105 /gi=4316135 /ug=Mm.27206 /len=422 /STRA=for			1442.75	1150.17	0.797204	0.478341		0.474788	0.378444
99109_at	421	485	360	686		181	435	494	512	437	277	696	391		Mouse growth factor-inducible protein (pip92) mRNA, complete cds /cds=(103,768) /gb=M59821 /gi=200354 /ug=Mm.399 /len=1515 /STRA=for			488	389.333	0.797814	0.291347		0.80123	1.42623
104469_at	443	500	114	343		124	150	294	290	387	431	252	255		Mouse OTS-8 mRNA, complete cds /cds=(166,780) /gb=M73748 /gi=200164 /ug=Mm.2976 /len=1661 /STRA=for			350	279.333	0.798095	0.464704		0.728571	0.72
102779_at	82	247	227	50		147	78	171	105	126	99	50	107		Myeloid differentiation primary response gene 118 /cds=(225,707) /gb=X54149 /gi=53290 /ug=Mm.1360 /len=1305 /STRA=for			151.5	121	0.79868	0.499701		0.706271	0.330033
102852_at	264	237	216	184		152	149	172	179	185	243	159	125		Cadherin 2 /cds=(332,3052) /gb=M31131 /gi=192327 /ug=Mm.14897 /len=4321 /STRA=for			225.25	180	0.799112	0.0729373		0.554939	0.705882
104337_f_at	82	152	76	57		50	50	50	58	131	101	70	50		uo65g07.x1 Mus musculus cDNA, 3' end /clone=IMAGE-2647452 /clone_end=3' /gb=AW208938 /gi=6514878 /ug=Mm.2252 /len=715 /STRA=for			91.75	73.3333	0.799273	0.466479		0.544959	0.762943
99098_at	2005	2234	1283	2479		357	981	2170	2367	2279	1441	1687	1894		UI-M-BH1-aks-c-08-0-UI.s1 Mus musculus cDNA, 3' end /clone=UI-M-BH1-aks-c-08-0-UI /clone_end=3' /gb=AW045533 /gi=5906062 /ug=Mm.39472 /len=426 /STRA=for			2000.25	1599.17	0.799483	0.412118		0.946882	0.843395
100600_at	368	1269	982	911		688	470	946	986	573	571	211	637		CD24a antigen /cds=(72,302) /gb=M58661 /gi=198985 /ug=Mm.6417 /len=1800 /STRA=for			882.5	705.667	0.799622	0.365613		0.721813	0.239093
98152_at	406	980	735	544		621	383	516	540	571	568	438	515		UI-M-BH2.2-aow-e-09-0-UI.s1 Mus musculus cDNA, 3' end /clone=UI-M-BH2.2-aow-e-09-0-UI /clone_end=3' /gb=AW122407 /gi=6097909 /ug=Mm.35738 /len=471 /STRA=for			666.25	533.167	0.80025	0.248072		0.772983	0.657411
102646_at	128	234	56	56		50	50	154	135	79	101	80	50		UI-M-BH2.2-aos-b-02-0-UI.s1 Mus musculus cDNA, 3' end /clone=UI-M-BH2.2-aos-b-02-0-UI /clone_end=3' /gb=AW122284 /gi=6097765 /ug=Mm.13148 /len=336 /STRA=for			118.5	94.8333	0.800281	0.570078		0.421941	0.675105
98927_at	293	205	257	225		270	113	172	119	224	279	305	128		UI-M-BH0-ajv-f-08-0-UI.s1 Mus musculus cDNA, 3' end /clone=UI-M-BH0-ajv-f-08-0-UI /clone_end=3' /gb=AI851048 /gi=5494954 /ug=Mm.28650 /len=129 /STRA=for			245	196.167	0.80068	0.25883		0.522449	1.2449
98841_at	71	101	84	97		64	50	101	90	50	69	75	82		Activin receptor IIA /cds=(70,1611) /gb=M65287 /gi=191663 /ug=Mm.5041 /len=2563 /STRA=for			88.25	70.6667	0.800755	0.179974		0.929178	0.849858
94987_at	92	212	79	79		82	152	144	59	68	50	172	62		Phosphatidylethanolamine N-methyltransferase /cds=(15,614) /gb=U25051 /gi=837253 /ug=Mm.2731 /len=797 /STRA=for			115.5	92.5	0.800866	0.519328		0.536797	1.48918
93581_at	1070	914	647	1169		668	633	991	829	741	705	967	714		UI-M-BG0-ahs-b-12-0-UI.s1 Mus musculus cDNA, 3' end /clone=UI-M-BG0-ahs-b-12-0-UI /clone_end=3' /gb=AI845121 /gi=5489027 /ug=Mm.2060 /len=361 /STRA=for			950	761.167	0.801228	0.130772		0.751579	1.01789
102342_at	138	218	50	157		50	50	111	192	50	224	145	85		N-ethylmaleimide sensitive fusion protein /cds=(33,2267) /gb=U10120 /gi=557877 /ug=Mm.1117 /len=2468 /STRA=for			140.75	112.833	0.801658	0.579822		0.603908	1.0302
102868_g_at	101	74	50	66		67	50	56	50	77	50	50	50		TEA domain family member 4 /cds=(0,1138) /gb=U51743 /gi=1381555 /ug=Mm.14774 /len=1339 /STRA=for			72.75	58.3333	0.801833	0.195499		0.687285	0.687285
103549_at	114	91	50	163		123	50	86	125	50	69	94	118		UI-M-BH1-amj-f-05-0-UI.s2 Mus musculus cDNA, 3' end /clone=UI-M-BH1-amj-f-05-0-UI /clone_end=3' /gb=AW061260 /gi=6009011 /ug=Mm.23742 /len=185 /STRA=for			104.5	83.8333	0.802233	0.439758		1.12919	0.899522
95297_at	67	82	50	50		50	50	50	50	50	50	50	50		Homeo box A1 /cds=(80,1075) /gb=M22115 /gi=193047 /ug=Mm.197 /len=2216 /STRA=for			62.25	50	0.803213	0.0792088		0.803213	0.803213
94428_at	133	187	124	85		50	61	132	123	143	129	90	115		UI-M-AO1-aeo-a-05-0-UI.s1 Mus musculus cDNA, 3' end /clone=UI-M-AO1-aeo-a-05-0-UI /clone_end=3' /gb=AI842668 /gi=5476881 /ug=Mm.2644 /len=378 /STRA=for			132.25	106.333	0.804033	0.353989		0.869565	0.680529
96259_at	592	801	414	598		278	335	667	694	495	432	574	342		Puromycin-sensitive aminopeptidase /cds=(105,2867) /gb=U35646 /gi=1184160 /ug=Mm.29824 /len=3051 /STRA=for			601.25	483.5	0.804158	0.303431		0.568815	0.954678
103825_at	98	173	50	162		96	50	123	101	108	105	73	126		Mus musculus S6 kinase 2 /cds=(0,1457) /gb=AJ007938 /gi=3901074 /ug=Mm.20917 /len=1491 /STRA=for			120.75	97.1667	0.804693	0.391965		1.04348	0.604555
92614_at	358	483	340	280		256	217	341	374	222	355	262	172		Inhibitor of DNA binding 3 /cds=(57,416) /gb=M60523 /gi=193872 /ug=Mm.110 /len=969 /STRA=for			365.25	294.167	0.805384	0.187508		0.47091	0.717317
93593_f_at	825	1215	1011	1085		614	676	1036	998	909	768	480	620		Epithelial membrane protein 3 /cds=(201,692) /gb=U87948 /gi=2358253 /ug=Mm.20829 /len=695 /STRA=for			1034	833.5	0.806093	0.104725		0.599613	0.464217
103348_at	282	282	232	291		162	140	271	265	185	292	196	126		UI-M-AK0-adj-c-07-0-UI.s1 Mus musculus cDNA, 3' end /clone=UI-M-AK0-adj-c-07-0-UI /clone_end=3' /gb=AI837688 /gi=5471901 /ug=Mm.18311 /len=392 /STRA=for			271.75	219.167	0.806501	0.166817		0.463661	0.721251
96135_at	583	1514	877	654		510	516	862	896	749	863	520	630		ub58d03.r1 Mus musculus cDNA, 5' end /clone=IMAGE-1381925 /clone_end=5' /gb=AA833425 /gi=2907153 /ug=Mm.28149 /len=490 /STRA=for			907	732.667	0.807791	0.386465		0.694598	0.573319
104135_at	116	128	50	74		50	50	82	80	134	50	109	79		UI-M-BH1-akr-c-02-0-UI.s1 Mus musculus cDNA, 3' end /clone=UI-M-BH1-akr-c-02-0-UI /clone_end=3' /gb=AW045474 /gi=5905968 /ug=Mm.22085 /len=318 /STRA=for			92	74.3333	0.807971	0.447373		0.858696	1.18478
99559_at	168	405	185	350		109	162	232	262	217	361	171	228		Aldehyde dehydrogenase 4, liver microsomal (class 3) /cds=(113,1567) /gb=U14390 /gi=687253 /ug=Mm.4210 /len=2997 /STRA=for			277	223.833	0.808063	0.432486		0.823105	0.617329
100961_at	70	216	104	93		66	122	120	137	90	51	122	50		Long (electocardiographic) QT syndrome 2 /cds=(321,3809) /gb=AF012871 /gi=2582014 /ug=Mm.6539 /len=4221 /STRA=for			120.75	97.6667	0.808834	0.479236		0.414079	1.01035
99179_at	524	427	189	412		207	224	414	539	273	228	202	411		UI-M-AM1-agb-h-07-0-UI.s1 Mus musculus cDNA, 3' end /clone=UI-M-AM1-agb-h-07-0-UI /clone_end=3' /gb=AI846233 /gi=5490139 /ug=Mm.41793 /len=171 /STRA=for			388	314.167	0.809708	0.426951		1.05928	0.520619
96789_i_at	56	91	50	50		50	50	50	50	50	50	50	50		UI-M-BH2.1-aps-c-12-0-UI.s1 Mus musculus cDNA, 3' end /clone=UI-M-BH2.1-aps-c-12-0-UI /clone_end=3' /gb=AW125222 /gi=6100752 /ug=Mm.29098 /len=396 /STRA=for			61.75	50	0.809717	0.169837		0.809717	0.809717
94366_at	138	151	74	126		50	75	163	129	127	50	149	151		UI-M-BH2.3-aoe-f-01-0-UI.s1 Mus musculus cDNA, 3' end /clone=UI-M-BH2.3-aoe-f-01-0-UI /clone_end=3' /gb=AW121767 /gi=6097113 /ug=Mm.25296 /len=374 /STRA=for			122.25	99	0.809816	0.423259		1.23517	1.21881
96603_at	70	177	116	93		50	72	93	87	126	126	74	120		UI-M-BH2.1-aqb-g-04-0-UI.s1 Mus musculus cDNA, 3' end /clone=UI-M-BH2.1-aqb-g-04-0-UI /clone_end=3' /gb=AW123556 /gi=6099086 /ug=Mm.27035 /len=370 /STRA=for			114	92.3333	0.809942	0.38873		1.05263	0.649123
96269_at	1136	1036	599	806		54	358	1361	1396	730	448	629	286		vu69f10.r1 Mus musculus cDNA, 5' end /clone=IMAGE-1196683 /clone_end=5' /gb=AA716963 /gi=2729237 /ug=Mm.29847 /len=273 /STRA=for			894.25	724.5	0.810176	0.582921		0.319821	0.703383
104573_at	268	318	246	282		147	257	288	303	178	181	233	224		vy83h09.r1 Mus musculus cDNA, 5' end /clone=IMAGE-1312865 /clone_end=5' /gb=AA921069 /gi=3067848 /ug=Mm.23925 /len=263 /STRA=for			278.5	225.667	0.810293	0.173777		0.804309	0.836625
94875_at	300	362	222	263		205	116	297	304	228	246	174	125		UI-M-AO0-ace-a-11-0-UI.s1 Mus musculus cDNA, 3' end /clone=UI-M-AO0-ace-a-11-0-UI /clone_end=3' /gb=AI838915 /gi=5473128 /ug=Mm.23825 /len=398 /STRA=for			286.75	232.667	0.811392	0.237165		0.43592	0.6068
103909_at	87	121	68	82		50	50	71	98	60	107	78	65		UI-M-AN0-acp-f-07-0-UI.s1 Mus musculus cDNA, 3' end /clone=UI-M-AN0-acp-f-07-0-UI /clone_end=3' /gb=AI839702 /gi=5473915 /ug=Mm.21414 /len=287 /STRA=for			89.5	72.6667	0.811918	0.30493		0.726257	0.871508
104608_at	101	58	110	75		89	74	50	56	86	64	50	59		UI-M-BH0-ajs-e-11-0-UI.s1 Mus musculus cDNA, 3' end /clone=UI-M-BH0-ajs-e-11-0-UI /clone_end=3' /gb=AI854293 /gi=5498199 /ug=Mm.24143 /len=511 /STRA=for			86	69.8333	0.812016	0.229912		0.686047	0.581395
94778_at	50	50	50	106		50	50	50	50	52	60	50	69		Mus musculus aldehyde dehydrogenase Ahd-2-like mRNA, complete cds /cds=(44,1549) /gb=U96401 /gi=2289239 /ug=Mm.16773 /len=2060 /STRA=for			64	52	0.8125	0.317438		1.07812	0.78125
103445_at	121	50	50	75		69	92	50	50	50	50	100	97		Mus musculus putative homeobox 2.2 protein gene, partial cds /cds=(0,293) /gb=M18401 /gi=193936 /ug=Mm.215 /len=294 /STRA=for			74	60.1667	0.813063	0.410227		1.31081	1.35135
101484_at	316	374	171	262		87	98	328	396	262	199	240	204		Next to the Brca1 /cds=(290,3256) /gb=U73039 /gi=1815651 /ug=Mm.784 /len=4444 /STRA=for			280.75	228.333	0.813298	0.486949		0.726625	0.854853
96097_at	157	98	228	248		97	219	248	228	50	50	290	133		UI-M-AI1-afl-h-05-0-UI.s1 Mus musculus cDNA, 3' end /clone=UI-M-AI1-afl-h-05-0-UI /clone_end=3' /gb=AI847973 /gi=5491879 /ug=Mm.26773 /len=457 /STRA=for			182.75	148.667	0.813497	0.550398		0.72777	1.58687
100091_at	1059	863	560	834		543	465	993	776	604	667	648	489		House mouse; Musculus domesticus mRNA for UDP-galactose transporter related isozyme 1, complete cds /cds=(88,1056) /gb=D87990 /gi=1694638 /ug=Mm.4593 /len=1169 /STRA=for			829	674.667	0.813832	0.25516		0.589867	0.781665
93148_at	171	210	161	160		64	134	177	159	132	191	139	146		UI-M-BH0-ajv-c-07-0-UI.s1 Mus musculus cDNA, 3' end /clone=UI-M-BH0-ajv-c-07-0-UI /clone_end=3' /gb=AI851013 /gi=5494919 /ug=Mm.5231 /len=485 /STRA=for			175.5	142.833	0.813865	0.224442		0.831909	0.792023
96657_at	1224	1287	826	1542		550	471	1153	1387	1400	996	422	783		Spermidine/spermine N1-acetyl transferase /cds=(89,604) /gb=L10244 /gi=309503 /ug=Mm.2734 /len=961 /STRA=for			1219.75	992.833	0.813965	0.366418		0.641935	0.345973
96985_at	68	111	104	124		53	113	105	50	81	95	83	130		Mus musculus gene for odorant receptor MOR18, complete cds /cds=(0,926) /gb=AB030895 /gi=6178007 /ug=Mm.88825 /len=927 /STRA=for			101.75	82.8333	0.814087	0.28552		1.27764	0.815725
94483_at	286	250	218	277		146	155	255	196	249	258	360	168		UI-M-BH1-anj-e-09-0-UI.s1 Mus musculus cDNA, 3' end /clone=UI-M-BH1-anj-e-09-0-UI /clone_end=3' /gb=AW060442 /gi=6008193 /ug=Mm.28881 /len=471 /STRA=for			257.75	209.833	0.814096	0.135261		0.651794	1.3967
99100_at	336	490	146	271		78	118	395	418	242	267	297	166		UI-M-AK0-adc-d-07-0-UI.s1 Mus musculus cDNA, 3' end /clone=UI-M-AK0-adc-d-07-0-UI /clone_end=3' /gb=AI837104 /gi=5471317 /ug=Mm.3948 /len=413 /STRA=for			310.75	253	0.814159	0.542219		0.534191	0.955752
99156_at	85	160	65	123		55	50	117	108	102	97	50	106		UI-M-BH0-air-e-04-0-UI.s1 Mus musculus cDNA, 3' end /clone=UI-M-BH0-air-e-04-0-UI /clone_end=3' /gb=AI853370 /gi=5497276 /ug=Mm.41617 /len=415 /STRA=for			108.25	88.1667	0.814473	0.389559		0.979215	0.461894
100946_at	124	297	242	113		77	160	168	240	153	151	102	142		Mus musculus MHC class III region RD gene, partial cds; Bf, C2, G9A, NG22, G9, HSP70, HSP70, HSC70t, and smRNP genes, complete cds; G7A gene, partial cds; and unknown genes /cds=(0,1928) /gb=AF109906 /gi=3986763 /ug=Mm.6388 /len=1929 /STRA=for			194	158.167	0.815292	0.442887		0.731959	0.525773
104394_at	57	79	64	91		50	50	79	77	50	50	50	50		UI-M-BH2.2-aoq-c-10-0-UI.s1 Mus musculus cDNA, 3' end /clone=UI-M-BH2.2-aoq-c-10-0-UI /clone_end=3' /gb=AW121609 /gi=6096942 /ug=Mm.22759 /len=137 /STRA=for			72.75	59.3333	0.815578	0.196867		0.687285	0.687285
97487_at	145	50	50	50		50	50	111	50	50	50	62	50		Serine protease inhibitor 4 /cds=(148,1341) /gb=X70296 /gi=551064 /ug=Mm.3093 /len=2024 /STRA=for			73.75	60.1667	0.815819	0.565674		0.677966	0.840678
98042_at	840	669	489	592		263	348	514	512	743	790	489	533		UI-M-BH1-anm-e-03-0-UI.s1 Mus musculus cDNA, 3' end /clone=UI-M-BH1-anm-e-03-0-UI /clone_end=3' /gb=AW049787 /gi=5910316 /ug=Mm.34126 /len=434 /STRA=for			647.5	528.333	0.815959	0.355605		0.823166	0.755212
97352_f_at	257	254	146	302		179	201	130	132	290	243	142	277		UI-M-BH2.1-aqb-h-04-0-UI.s1 Mus musculus cDNA, 3' end /clone=UI-M-BH2.1-aqb-h-04-0-UI /clone_end=3' /gb=AW123567 /gi=6099097 /ug=Mm.29625 /len=370 /STRA=for			239.75	195.833	0.816823	0.320224		1.15537	0.592284
98995_at	90	113	50	53		50	50	63	75	87	50	98	50		M.musculus mRNA for E2F-5 protein /cds=(15,1022) /gb=X86925 /gi=806571 /ug=Mm.379 /len=1340 /STRA=for			76.5	62.5	0.816993	0.360166		0.653595	1.28105
100905_at	50	168	119	62		50	50	92	115	103	80	89	59		UI-M-AJ1-aha-g-09-0-UI.s1 Mus musculus cDNA, 3' end /clone=UI-M-AJ1-aha-g-09-0-UI /clone_end=3' /gb=AI849361 /gi=5493267 /ug=Mm.5772 /len=132 /STRA=for			99.75	81.6667	0.818713	0.500452		0.591479	0.892231
100292_at	87	143	278	50		116	140	50	189	50	141	124	50		vv51g11.x1 Mus musculus cDNA, 3' end /clone=IMAGE-1225988 /clone_end=3' /gb=AI646422 /gi=4724897 /ug=Mm.86361 /len=295 /STRA=rev			139.5	114.333	0.819594	0.617963		0.358423	0.888889
95683_g_at	3236	3649	2600	3084		2183	2070	2949	2659	2649	2945	2985	2826		Mus musculus mRNA for XPE UV-damaged DNA binding factor, complete cds /cds=(81,3503) /gb=AB026432 /gi=5931595 /ug=Mm.29623 /len=4171 /STRA=for			3142.25	2575.83	0.819742	0.0580645		0.899356	0.949956
102969_at	138	165	125	125		50	92	206	162	97	73	87	75		UI-M-AN1-afh-g-04-0-UI.s1 Mus musculus cDNA, 3' end /clone=UI-M-AN1-afh-g-04-0-UI /clone_end=3' /gb=AI847369 /gi=5491240 /ug=Mm.183 /len=436 /STRA=for			138.25	113.333	0.819771	0.443935		0.542495	0.629295
103497_at	86	119	59	92		50	50	76	107	91	64	111	50		vo27b01.r1 Mus musculus cDNA, 5' end /clone=IMAGE-1051081 /clone_end=5' /gb=AA592351 /gi=2406014 /ug=Mm.22318 /len=131 /STRA=for			89	73	0.820225	0.323776		0.561798	1.24719
103605_g_at	211	170	129	149		92	117	158	133	178	134	175	91		uo70a01.y1 Mus musculus cDNA, 5' end /clone=IMAGE-2647848 /clone_end=5' /gb=AW231026 /gi=6560258 /ug=Mm.20156 /len=482 /STRA=for			164.75	135.333	0.821447	0.193585		0.552352	1.06222
98544_at	448	492	376	475		231	285	545	531	365	250	306	257		Mus musculus guanylate kinase (gmk) mRNA, complete cds /cds=(24,620) /gb=U53514 /gi=1408589 /ug=Mm.3624 /len=663 /STRA=for			447.75	367.833	0.821515	0.312069		0.573981	0.683417
93714_f_at	811	987	775	904		275	753	964	757	834	705	524	505		ub83g12.r1 Mus musculus cDNA, 5' end /clone=IMAGE-1395142 /clone_end=5' /gb=AI117211 /gi=3517535 /ug=Mm.86632 /len=464 /STRA=for			869.25	714.667	0.822165	0.251586		0.580961	0.602819
95551_at	75	198	114	134		122	80	115	129	129	68	106	128		UI-M-AJ1-agz-c-07-0-UI.s1 Mus musculus cDNA, 3' end /clone=UI-M-AJ1-agz-c-07-0-UI /clone_end=3' /gb=AI849232 /gi=5493138 /ug=Mm.27738 /len=419 /STRA=for			130.25	107.167	0.822777	0.371757		0.982726	0.81382
94815_at	137	145	85	50		50	50	128	126	70	91	50	50		Murine mRNA for 2,3-bisphosphoglycerate mutase (BPGM; EC 5.4.2.4) /cds=(20,799) /gb=X13586 /gi=50183 /ug=Mm.22706 /len=825 /STRA=for			104.25	85.8333	0.823341	0.487306		0.479616	0.479616
97248_at	908	604	398	610		220	297	617	789	508	682	765	466		M.musculus mRNA for diazepam-binding inhibitor /cds=(62,325) /gb=X61431 /gi=50712 /ug=Mm.2785 /len=390 /STRA=for			630	518.833	0.823545	0.452236		0.739683	1.21429
96606_at	54	201	72	80		50	50	100	63	147	93	50	75		Mus musculus mRNA for Sid470p, complete cds /cds=(55,642) /gb=AB025217 /gi=5931554 /ug=Mm.27065 /len=782 /STRA=for			101.75	83.8333	0.823915	0.598855		0.737101	0.4914
97012_f_at	50	144	145	160		190	122	80	58	117	50	92	50		UI-M-AO0-aca-h-06-0-UI.s1 Mus musculus cDNA, 3' end /clone=UI-M-AO0-aca-h-06-0-UI /clone_end=3' /gb=AI838702 /gi=5472915 /ug=Mm.88947 /len=312 /STRA=rev			124.75	102.833	0.824315	0.527105		0.400802	0.737475
98092_at	138	66	50	50		50	50	50	90	86	50	50	50		vw17a10.r1 Mus musculus cDNA, 5' end /clone=IMAGE-1244058 /clone_end=5' /gb=AA790307 /gi=2850427 /ug=Mm.34609 /len=581 /STRA=for			76	62.6667	0.824561	0.511423		0.657895	0.657895
103405_at	79	97	86	50		60	72	50	104	50	50	103	99		UI-M-AQ1-adx-f-11-0-UI.s1 Mus musculus cDNA, 3' end /clone=UI-M-AQ1-adx-f-11-0-UI /clone_end=3' /gb=AI845617 /gi=5489523 /ug=Mm.18783 /len=287 /STRA=for			78	64.3333	0.824786	0.339582		1.26923	1.32051
97010_at	97	50	55	50		62	50	50	50	50	50	50	50		M.musculus nicotinic acetylcholine receptor beta 2-subunit gene (promoter) /cds=(91,154) /gb=X82655 /gi=1438067 /ug=Mm.88858 /len=164 /STRA=for			63	52	0.825397	0.273157		0.793651	0.793651
97489_at	223	216	124	133		109	160	139	99	206	149	206	165		UI-M-AO1-ael-b-05-0-UI.s1 Mus musculus cDNA, 3' end /clone=UI-M-AO1-ael-b-05-0-UI /clone_end=3' /gb=AI846739 /gi=5490645 /ug=Mm.30969 /len=279 /STRA=for			174	143.667	0.82567	0.320421		0.948276	1.18391
101517_at	314	261	279	303		261	185	299	304	173	212	283	233		M.musculus tex261 mRNA /cds=(35,625) /gb=X81058 /gi=531527 /ug=Mm.848 /len=1398 /STRA=for			289.25	239	0.826275	0.139534		0.805532	0.978392
94695_at	50	92	50	50		50	50	50	50	50	50	50	50		C81411 Mus musculus cDNA, 3' end /clone=J0098H06 /clone_end=3' /gb=C81411 /gi=2521741 /ug=Mm.13352 /len=586 /STRA=rev			60.5	50	0.826446	0.241504		0.826446	0.826446
100756_r_at	696	586	106	722		137	176	136	622	983	562	1090	1005		Mouse thymidylate synthase pseudogene mRNA, complete cds /cds=UNKNOWN /gb=M30774 /gi=200561 /ug=Mm.89931 /len=1349 /STRA=for			527.5	436	0.82654	0.674072		1.90521	2.06635
93737_at	110	50	50	52		50	50	50	50	75	50	50	50		Mus musculus hemin-sensitive initiation factor 2 alpha kinase mRNA, complete cds /cds=(212,2071) /gb=AF028808 /gi=3924930 /ug=Mm.20949 /len=2768 /STRA=for			65.5	54.1667	0.826972	0.403051		0.763359	0.763359
103376_s_at	69	108	68	129		50	50	116	103	95	50	88	50		Phosphatidylinositol membrane-associated /cds=(138,3869) /gb=AF006467 /gi=2618982 /ug=Mm.1860 /len=4106 /STRA=for			93.5	77.3333	0.827094	0.434937		0.534759	0.941176
101591_at	415	338	252	390		237	155	275	275	385	405	340	218		UI-M-BH0-aiu-b-07-0-UI.s1 Mus musculus cDNA, 3' end /clone=UI-M-BH0-aiu-b-07-0-UI /clone_end=3' /gb=AI852589 /gi=5496495 /ug=Mm.91334 /len=235 /STRA=for			348.75	288.667	0.827718	0.311112		0.62509	0.97491
102796_at	504	682	417	375		251	224	501	562	506	412	466	373		Nucleoplasmin 3 /cds=(7,534) /gb=U64450 /gi=1785994 /ug=Mm.1406 /len=866 /STRA=for			494.5	409.333	0.827772	0.372416		0.754297	0.942366
104704_at	146	206	134	122		56	50	176	235	79	159	58	50		UI-M-AK0-adg-e-08-0-UI.s1 Mus musculus cDNA, 3' end /clone=UI-M-AK0-adg-e-08-0-UI /clone_end=3' /gb=AI837630 /gi=5471843 /ug=Mm.24387 /len=441 /STRA=for			152	125.833	0.827851	0.542726		0.328947	0.381579
98631_g_at	337	404	245	354		103	226	388	306	384	258	152	247		um33b04.y1 Mus musculus cDNA, 5' end /clone=IMAGE-2236303 /clone_end=5' /gb=AW106745 /gi=6077545 /ug=Mm.38792 /len=600 /STRA=for			335	277.5	0.828358	0.372287		0.737313	0.453731
94477_at	111	140	128	111		80	86	164	77	81	121	93	50		UI-M-BH2.1-apm-e-03-0-UI.s1 Mus musculus cDNA, 3' end /clone=UI-M-BH2.1-apm-e-03-0-UI /clone_end=3' /gb=AW123796 /gi=6099326 /ug=Mm.28870 /len=423 /STRA=for			122.5	101.5	0.828571	0.290519		0.408163	0.759184
97518_at	807	622	456	753		98	299	782	783	901	419	532	273		Mouse mRNA for squalene synthase /cds=(20,1270) /gb=D29016 /gi=468456 /ug=Mm.3204 /len=1634 /STRA=for			659.5	547	0.829416	0.538652		0.41395	0.806672
95349_g_at	222	188	50	150		50	65	234	310	50	50	550	90		GRO1 oncogene /cds=(1,291) /gb=J04596 /gi=201042 /ug=Mm.21013 /len=884 /STRA=for			152.5	126.5	0.829508	0.703138		0.590164	3.60656
94365_at	64	68	50	59		50	50	50	50	50	50	50	51		vt49a11.r1 Mus musculus cDNA, 5' end /clone=IMAGE-1166396 /clone_end=5' /gb=AA710175 /gi=2720093 /ug=Mm.25285 /len=481 /STRA=for			60.25	50	0.829876	0.0102208		0.846473	0.829876
100018_at	50	91	50	50		50	50	50	50	50	50	50	50		M. musculus mRNA for MRE-binding transcription factor /cds=(96,2123) /gb=X71327 /gi=510149 /ug=Mm.4563 /len=2559 /STRA=for			60.25	50	0.829876	0.241504		0.829876	0.829876
101039_at	808	1228	821	418		460	430	445	677	1096	971	381	309		Procollagen, type IV, alpha 2 /cds=(0,2216) /gb=X04647 /gi=1022322 /ug=Mm.6954 /len=3189 /STRA=rev			818.75	679.833	0.830331	0.502649		0.377405	0.465344
102224_at	519	976	853	484		583	446	830	760	399	510	648	509		Mus musculus insulin-like growth factor I receptor mRNA, complete cds /cds=(0,4121) /gb=AF056187 /gi=3025893 /ug=Mm.10226 /len=4500 /STRA=rev			708	588	0.830508	0.386016		0.718927	0.915254
94503_at	509	639	391	426		252	355	523	491	356	471	411	407		UI-M-AM1-afy-h-05-0-UI.s1 Mus musculus cDNA, 3' end /clone=UI-M-AM1-afy-h-05-0-UI /clone_end=3' /gb=AI842492 /gi=5476705 /ug=Mm.28952 /len=259 /STRA=for			491.25	408	0.830534	0.259601		0.828499	0.836641
104225_at	281	321	227	261		136	207	257	237	313	208	305	157		vs46d05.y1 Mus musculus cDNA, 5' end /clone=IMAGE-1149321 /clone_end=5' /gb=AI645050 /gi=4723525 /ug=Mm.27988 /len=373 /STRA=rev			272.5	226.333	0.830581	0.210331		0.576147	1.11927
99509_s_at	58	185	107	117		65	90	130	99	94	104	130	100		Janus kinase 3 /cds=(71,3373) /gb=L40172 /gi=1019909 /ug=Mm.4181 /len=3528 /STRA=for			116.75	97	0.830835	0.421385		0.856531	1.11349
96243_f_at	126	257	103	112		50	101	199	175	110	111	125	112		UI-M-BH2.3-aoa-a-08-0-UI.s1 Mus musculus cDNA, 3' end /clone=UI-M-BH2.3-aoa-a-08-0-UI /clone_end=3' /gb=AW120804 /gi=6096137 /ug=Mm.29803 /len=289 /STRA=for			149.5	124.333	0.831661	0.543902		0.749164	0.83612
94260_at	578	810	582	637		340	388	597	664	665	602	479	415		UI-M-BG1-aig-a-08-0-UI.s1 Mus musculus cDNA, 3' end /clone=UI-M-BG1-aig-a-08-0-UI /clone_end=3' /gb=AI850352 /gi=5494258 /ug=Mm.22428 /len=420 /STRA=for			651.75	542.667	0.83263	0.232202		0.636747	0.734944
102296_at	50	67	59	77		50	50	64	50	52	50	50	50		Proprotein convertase subtilisin/kexin type 2 /cds=(84,1997) /gb=M55669 /gi=198591 /ug=Mm.1247 /len=2216 /STRA=for			63.25	52.6667	0.832675	0.0843322		0.790514	0.790514
102930_at	85	153	61	50		83	56	50	50	80	117	50	50		Silver /cds=(0,1880) /gb=U14133 /gi=887940 /ug=Mm.16756 /len=1881 /STRA=for			87.25	72.6667	0.832856	0.537405		0.573066	0.573066
93037_i_at	386	597	400	364		248	292	426	418	371	428	220	290		Lipocortin 1 /cds=(14,1054) /gb=M69260 /gi=198844 /ug=Mm.14860 /len=1340 /STRA=for			436.75	363.833	0.833047	0.243661		0.663995	0.503721
100447_at	50	100	220	50		221	81	50	61	62	50	50	100		Hyaluronidase 2 /cds=(143,1561) /gb=AJ000059 /gi=2370292 /ug=Mm.4834 /len=1881 /STRA=for			105	87.5	0.833333	0.715843		0.952381	0.47619
93320_at	351	373	83	296		87	78	326	331	230	327	86	163		Carnitine palmitoyltransferase 1, liver /cds=(0,2296) /gb=AF017175 /gi=2388721 /ug=Mm.18522 /len=4414 /STRA=for			275.75	229.833	0.833484	0.585017		0.591115	0.311877
100917_at	118	122	58	96		54	50	64	157	95	73	96	50		vt28b10.r1 Mus musculus cDNA, 5' end /clone=IMAGE-1164379 /clone_end=5' /gb=AA795841 /gi=2858796 /ug=Mm.5972 /len=126 /STRA=for			98.5	82.1667	0.834179	0.506376		0.507614	0.974619
104022_at	71	267	102	97		50	50	176	214	91	91	95	50		vn57d03.r1 Mus musculus cDNA, 5' end /clone=IMAGE-1025285 /clone_end=5' /gb=AA590060 /gi=2403440 /ug=Mm.26973 /len=379 /STRA=for			134.25	112	0.834264	0.665254		0.372439	0.707635
103708_at	335	568	375	316		138	165	472	498	338	387	414	255		ue28g02.x1 Mus musculus cDNA, 3' end /clone=IMAGE-1481714 /clone_end=3' /gb=AI132207 /gi=3602223 /ug=Mm.24090 /len=450 /STRA=for			398.5	333	0.835634	0.487957		0.6399	1.0389
95431_at	99	205	76	108		50	58	127	143	131	103	79	72		vn33a01.r1 Mus musculus cDNA, 5' end /clone=IMAGE-1022952 /clone_end=5' /gb=AA623426 /gi=2527302 /ug=Mm.24463 /len=303 /STRA=for			122	102	0.836066	0.526502		0.590164	0.647541
93408_at	75	68	90	50		50	50	86	50	50	69	50	62		UI-M-BG1-aih-e-09-0-UI.s1 Mus musculus cDNA, 3' end /clone=UI-M-BG1-aih-e-09-0-UI /clone_end=3' /gb=AI850482 /gi=5494388 /ug=Mm.6358 /len=467 /STRA=for			70.75	59.1667	0.836278	0.286964		0.876325	0.706714
98459_at	232	211	173	181		100	136	244	240	151	129	189	75		vy91d09.r1 Mus musculus cDNA, 5' end /clone=IMAGE-1313585 /clone_end=5' /gb=AA913994 /gi=3053386 /ug=Mm.34759 /len=511 /STRA=for			199.25	166.667	0.83647	0.349434		0.376412	0.948557
92666_at	50	89	50	50		50	50	50	50	50	50	50	50		M.musculus mRNA for 3BP-1, an SH3 domain binding protein /cds=(213,2018) /gb=X87671 /gi=861028 /ug=Mm.4462 /len=2359 /STRA=for			59.75	50	0.83682	0.241504		0.83682	0.83682
97507_at	50	89	50	50		50	50	50	50	50	50	50	50		Peptidylprolyl isomerase C-associated protein /cds=(168,1901) /gb=X67809 /gi=297032 /ug=Mm.3152 /len=2168 /STRA=for			59.75	50	0.83682	0.241504		0.83682	0.83682
94876_f_at	651	918	757	512		371	269	651	576	890	806	360	381		UI-M-AJ1-agz-a-02-0-UI.s1 Mus musculus cDNA, 3' end /clone=UI-M-AJ1-agz-a-02-0-UI /clone_end=3' /gb=AI849207 /gi=5493113 /ug=Mm.23836 /len=449 /STRA=for			709.5	593.833	0.836974	0.434586		0.536998	0.5074
99379_f_at	163	180	105	138		83	135	150	163	124	81	112	142		Mouse MHC class I D-region cell surface antigen (D2d) gene, complete cds /cds=(0,1061) /gb=M27034 /gi=199334 /ug=Mm.56927 /len=1062 /STRA=for			146.5	122.667	0.837315	0.303653		0.969283	0.764505
93868_at	225	244	146	176		50	134	204	237	195	174	104	114		Mus musculus cosmid CMX137 containing part of Nsdhl /cds=(0,578) /gb=AL021127 /gi=2769543 /ug=Mm.87851 /len=579 /STRA=for			197.75	165.667	0.837758	0.424447		0.576485	0.525917
93803_at	567	655	306	469		148	257	648	654	436	367	432	183		Mus musculus Psme3 gene for PA28 gamma subunit, complete cds /cds=(119,883) /gb=AB007139 /gi=3219287 /ug=Mm.2141 /len=2555 /STRA=for			499.25	418.333	0.837924	0.519835		0.36655	0.865298
97864_at	245	279	141	255		81	115	288	254	198	221	185	141		um74d01.y1 Mus musculus cDNA, 5' end /clone=IMAGE-2300929 /clone_end=5' /gb=AW258842 /gi=6631823 /ug=Mm.28327 /len=321 /STRA=for			230	192.833	0.838406	0.456655		0.613043	0.804348
99942_s_at	159	270	184	151		50	242	199	173	247	50	66	160		Mus musculus smooth muscle calponin gene, complete cds /cds=(80,973) /gb=U28932 /gi=984520 /ug=Mm.4356 /len=1469 /STRA=rev			191	160.167	0.838569	0.558951		0.837696	0.34555
102081_at	50	59	69	81		75	51	50	50	50	50	66	50		Mus musculus rig-1 protein mRNA, complete cds /cds=(226,4260) /gb=AF060570 /gi=4206385 /ug=Mm.42093 /len=5259 /STRA=for			64.75	54.3333	0.839125	0.195864		0.772201	1.01931
103037_at	129	132	98	50		103	64	73	75	148	52	98	113		Mus musculus cardiotrophin-1 mRNA, complete cds /cds=(19,630) /gb=U18366 /gi=710331 /ug=Mm.1616 /len=1345 /STRA=for			102.25	85.8333	0.839446	0.500829		1.10513	0.958435
95139_at	248	250	127	204		179	159	146	222	229	109	116	133		UI-M-BH2.2-aoo-f-04-0-UI.s1 Mus musculus cDNA, 3' end /clone=UI-M-BH2.2-aoo-f-04-0-UI /clone_end=3' /gb=AW122075 /gi=6097482 /ug=Mm.29432 /len=463 /STRA=for			207.25	174	0.839566	0.338961		0.641737	0.55971
103404_at	308	499	309	285		121	122	220	362	445	495	222	207		UI-M-BH2.1-aoz-d-08-0-UI.s1 Mus musculus cDNA, 3' end /clone=UI-M-BH2.1-aoz-d-08-0-UI /clone_end=3' /gb=AW122831 /gi=6098361 /ug=Mm.1878 /len=376 /STRA=for			350.25	294.167	0.839876	0.559247		0.591006	0.633833
94371_at	298	118	310	197		219	330	99	235	173	107	409	114		Phospholipase D2 /cds=(138,2939) /gb=U87557 /gi=2088544 /ug=Mm.2538 /len=3494 /STRA=for			230.75	193.833	0.840014	0.535698		0.494041	1.77248
94916_at	551	601	321	365		50	189	580	561	551	385	365	283		UI-M-BH2.2-aov-g-11-0-UI.s1 Mus musculus cDNA, 3' end /clone=UI-M-BH2.2-aov-g-11-0-UI /clone_end=3' /gb=AW122260 /gi=6097729 /ug=Mm.24155 /len=161 /STRA=for			459.5	386	0.840044	0.575051		0.615887	0.794342
101790_f_at	50	85	50	57		50	55	50	50	50	50	50	65		Interferon alpha family, gene 4 /cds=(0,560) /gb=X01973 /gi=51544 /ug=Mm.57128 /len=561 /STRA=for			60.5	50.8333	0.84022	0.185219		1.07438	0.826446
97824_at	1495	2020	1625	1924		1046	1254	2083	1982	1335	1203	932	852		UI-M-BH2.3-aof-b-04-0-UI.s1 Mus musculus cDNA, 3' end /clone=UI-M-BH2.3-aof-b-04-0-UI /clone_end=3' /gb=AW121031 /gi=6096364 /ug=Mm.28203 /len=396 /STRA=for			1766	1483.83	0.840223	0.27939		0.482446	0.527746
97240_g_at	945	1087	655	973		440	530	895	868	1027	853	1095	897		UI-M-BG0-ahs-a-04-0-UI.s1 Mus musculus cDNA, 3' end /clone=UI-M-BG0-ahs-a-04-0-UI /clone_end=3' /gb=AI845106 /gi=5489012 /ug=Mm.27839 /len=141 /STRA=for			915	768.833	0.840255	0.320734		0.980328	1.19672
94664_at	50	81	65	88		50	59	59	90	50	50	59	50		EST02783 Mus musculus cDNA, 3' end /clone=C0026A02 /clone_end=3' /gb=AA408304 /gi=2067698 /ug=Mm.24486 /len=250 /STRA=rev			71	59.6667	0.840376	0.306541		0.704225	0.830986
96822_at	602	699	384	516		266	300	556	624	468	561	295	237		vr90e10.r1 Mus musculus cDNA, 5' end /clone=IMAGE-1136010 /clone_end=5' /gb=AA734428 /gi=2756095 /ug=Mm.29383 /len=409 /STRA=rev			550.25	462.5	0.840527	0.369063		0.430713	0.53612
103668_at	269	352	226	253		136	176	317	300	254	204	206	151		Suppressor of Ty 6 (S. cerevisiae) homolog /cds=(184,5364) /gb=U40375 /gi=1401056 /ug=Mm.20755 /len=5923 /STRA=for			275	231.167	0.840606	0.330129		0.549091	0.749091
102194_at	67	81	87	128		50	50	121	104	83	50	117	72		UI-M-BH2.2-aos-f-10-0-UI.s1 Mus musculus cDNA, 3' end /clone=UI-M-BH2.2-aos-f-10-0-UI /clone_end=3' /gb=AW122332 /gi=6097817 /ug=Mm.98631 /len=303 /STRA=rev			90.75	76.3333	0.841139	0.470212		0.793388	1.28926
97412_at	419	517	233	386		121	172	556	504	322	290	301	233		UI-M-AK1-aet-a-08-0-UI.s1 Mus musculus cDNA, 3' end /clone=UI-M-AK1-aet-a-08-0-UI /clone_end=3' /gb=AI843157 /gi=5477370 /ug=Mm.29952 /len=443 /STRA=for			388.75	327.5	0.842444	0.558464		0.599357	0.774277
98508_s_at	649	1101	889	756		368	550	833	938	741	861	349	594		Mus musculus mRNA for Phosphatidic acid phosphatase, complete cds /cds=(286,1137) /gb=D84376 /gi=1487872 /ug=Mm.35836 /len=1212 /STRA=for			848.75	715.167	0.842612	0.349509		0.699853	0.411193
103095_at	263	367	349	343		247	170	379	342	316	217	305	202		Growth factor receptor bound protein 7 /cds=(443,2050) /gb=M94450 /gi=193619 /ug=Mm.17500 /len=2420 /STRA=for			330.5	278.5	0.842663	0.278858		0.611195	0.922844
104102_at	535	633	283	464		136	243	532	544	541	425	408	337		UI-M-BH1-alv-d-06-0-UI.s1 Mus musculus cDNA, 3' end /clone=UI-M-BH1-alv-d-06-0-UI /clone_end=3' /gb=AW047978 /gi=5908547 /ug=Mm.21880 /len=497 /STRA=for			478.75	403.5	0.84282	0.500519		0.703916	0.852219
97465_at	91	50	96	121		56	101	50	50	50	146	91	77		Mus musculus orphan transporter isoform A8 (Xtrp2) mRNA, alternatively spliced, complete cds /cds=(71,1339) /gb=AF075267 /gi=3347931 /ug=Mm.30370 /len=1943 /STRA=rev			89.5	75.5	0.843575	0.566833		0.860335	1.01676
101505_at	141	182	165	114		79	121	101	83	138	240	157	105		UI-M-BH2.3-aok-f-04-0-UI.s1 Mus musculus cDNA, 3' end /clone=UI-M-BH2.3-aok-f-04-0-UI /clone_end=3' /gb=AW121234 /gi=6096567 /ug=Mm.8195 /len=426 /STRA=for			150.5	127	0.843854	0.492158		0.697674	1.04319
97483_at	9986	10397	8063	9375		6293	7440	9637	9092	7943	7470	7857	8351		Mus musculus ribosomal protein L19, complete cds /cds=(0,590) /gb=M62952 /gi=198642 /ug=Mm.30806 /len=673 /STRA=for			9455.25	7979.17	0.843887	0.0809488		0.883213	0.830967
93471_at	234	372	205	276		96	147	285	265	339	244	257	142		vo35a08.y1 Mus musculus cDNA, 5' end /clone=IMAGE-1051862 /clone_end=5' /gb=AI594427 /gi=4603475 /ug=Mm.7033 /len=447 /STRA=for			271.75	229.333	0.843913	0.459137		0.522539	0.945722
94821_at	231	332	252	185		99	152	247	232	302	234	210	198		UI-M-BH2.1-app-e-07-0-UI.s1 Mus musculus cDNA, 3' end /clone=UI-M-BH2.1-app-e-07-0-UI /clone_end=3' /gb=AW123880 /gi=6099410 /ug=Mm.22718 /len=448 /STRA=for			250	211	0.844	0.405559		0.792	0.84
103385_at	228	442	202	229		150	127	257	191	356	313	276	165		Mus musculus Tera (Tera) mRNA, complete cds /cds=(81,914) /gb=U64033 /gi=1575504 /ug=Mm.18637 /len=2720 /STRA=for			275.25	232.333	0.844081	0.523658		0.599455	1.00272
102015_at	138	168	76	127		50	50	157	108	146	134	171	203		UI-M-AM0-adr-d-01-0-UI.s1 Mus musculus cDNA, 3' end /clone=UI-M-AM0-adr-d-01-0-UI /clone_end=3' /gb=AI840678 /gi=5474891 /ug=Mm.10022 /len=217 /STRA=rev			127.25	107.5	0.844794	0.508661		1.59528	1.34381
100296_at	229	285	259	304		318	278	175	180	200	214	295	319		M.musculus mRNA for protein expressed at high levels in testis /cds=UNKNOWN /gb=X99253 /gi=1430872 /ug=Mm.86407 /len=1393 /STRA=rev			269.25	227.5	0.84494	0.230546		1.18477	1.09564
102200_at	82	70	104	99		76	80	86	89	69	50	94	104		Mus musculus aquaporin-8 mRNA, complete cds /cds=(135,920) /gb=AF018952 /gi=2353796 /ug=Mm.9970 /len=1448 /STRA=for			88.75	75	0.84507	0.186492		1.17183	1.05915
99150_at	235	254	140	275		124	164	251	244	208	155	191	188		UI-M-AL1-ahp-a-10-0-UI.s1 Mus musculus cDNA, 3' end /clone=UI-M-AL1-ahp-a-10-0-UI /clone_end=3' /gb=AI844357 /gi=5488263 /ug=Mm.41541 /len=413 /STRA=for			226	191	0.845133	0.349994		0.831858	0.845133
101011_at	1957	2608	1778	1693		1025	1185	2374	2420	1650	1535	1349	1589		Chaperonin subunit 4 (delta) /cds=(0,1619) /gb=L25913 /gi=460316 /ug=Mm.6821 /len=1847 /STRA=for			2009	1698.17	0.84528	0.389196		0.790941	0.671478
104017_at	102	84	50	55		50	50	64	50	88	67	50	50		Mus musculus mACS4 variant2 mRNA for Acyl-CoA synthetase 4 variant2, complete cds /cds=(317,2452) /gb=AB033887 /gi=6172344 /ug=Mm.26894 /len=2495 /STRA=for			72.75	61.5	0.845361	0.390631		0.687285	0.687285
104345_at	50	159	50	79		64	50	147	68	50	50	145	50		Mus musculus EXO70 protein (Exo70) mRNA, complete cds /cds=(0,2093) /gb=AF014461 /gi=2352997 /ug=Mm.22530 /len=2094 /STRA=for			84.5	71.5	0.846154	0.655488		0.591716	1.71598
103650_at	141	286	105	102		50	71	208	250	176	50	50	57		UI-M-AK1-aey-a-01-0-UI.s1 Mus musculus cDNA, 3' end /clone=UI-M-AK1-aey-a-01-0-UI /clone_end=3' /gb=AI846887 /gi=5490793 /ug=Mm.20414 /len=320 /STRA=for			158.5	134.167	0.846477	0.678322		0.359621	0.315457
97458_at	637	1189	834	615		559	480	740	786	679	915	486	454		UI-M-AK1-aex-f-04-0-UI.s1 Mus musculus cDNA, 3' end /clone=UI-M-AK1-aex-f-04-0-UI /clone_end=3' /gb=AI845935 /gi=5489841 /ug=Mm.30267 /len=380 /STRA=for			818.75	693.167	0.846616	0.36993		0.554504	0.593588
102716_at	50	87	50	50		51	50	50	50	50	50	50	146		Eyes absent 3 homolog (Drosophila) /cds=(228,1760) /gb=U81604 /gi=1816532 /ug=Mm.1430 /len=3882 /STRA=for			59.25	50.1667	0.846695	0.249545		2.46414	0.843882
96045_at	91	81	94	125		50	65	82	112	117	71	51	61		UI-M-BH1-ano-e-11-0-UI.s1 Mus musculus cDNA, 3' end /clone=UI-M-BH1-ano-e-11-0-UI /clone_end=3' /gb=AW050142 /gi=5910671 /ug=Mm.25994 /len=458 /STRA=for			97.75	82.8333	0.8474	0.365266		0.624041	0.521739
103309_at	160	208	93	118		50	75	133	186	160	132	100	50		UI-M-BH0-aiv-f-01-0-UI.s1 Mus musculus cDNA, 3' end /clone=UI-M-BH0-aiv-f-01-0-UI /clone_end=3' /gb=AI853977 /gi=5497883 /ug=Mm.21158 /len=265 /STRA=for			144.75	122.667	0.847438	0.520941		0.345423	0.690846
96655_g_at	137	380	50	93		155	50	165	213	118	138	105	50		UI-M-BH0-aiz-b-03-0-UI.s1 Mus musculus cDNA, 3' end /clone=UI-M-BH0-aiz-b-03-0-UI /clone_end=3' /gb=AI852916 /gi=5496822 /ug=Mm.27339 /len=392 /STRA=for			165	139.833	0.847475	0.707119		0.30303	0.636364
92454_at	50	50	50	97		57	52	50	55	50	50	50	50		Mus musculus orphan transporter (Xtrp3) mRNA, complete cds /cds=(30,1937) /gb=AF075261 /gi=3347919 /ug=Mm.41963 /len=1938 /STRA=for			61.75	52.3333	0.847503	0.346533		0.809717	0.809717
103858_at	253	302	167	208		160	186	231	242	168	196	171	189		UI-M-BH2.1-apn-b-12-0-UI.s1 Mus musculus cDNA, 3' end /clone=UI-M-BH2.1-apn-b-12-0-UI /clone_end=3' /gb=AW124023 /gi=6099553 /ug=Mm.21096 /len=436 /STRA=for			232.5	197.167	0.848029	0.25101		0.812903	0.735484
102627_at	573	755	414	543		339	242	625	628	462	611	500	332		Mus musculus coding region determinant binding protein mRNA, complete cds /cds=(130,1863) /gb=AF061569 /gi=3273748 /ug=Mm.12919 /len=2223 /STRA=for			571.25	484.5	0.84814	0.415668		0.581182	0.875274
104284_at	404	363	432	534		595	437	387	177	349	262	410	328		UI-M-AN1-afj-b-04-0-UI.s2 Mus musculus cDNA, 3' end /clone=UI-M-AN1-afj-b-04-0-UI /clone_end=3' /gb=AI846126 /gi=5490032 /ug=Mm.22258 /len=458 /STRA=for			433.25	367.833	0.849009	0.433197		0.757069	0.946336
95758_at	4748	5297	3111	4448		1626	2072	4924	4537	5027	4239	3727	2462		Stearoyl-coenzyme A desaturase 2 /cds=(300,1376) /gb=M26270 /gi=200933 /ug=Mm.298 /len=5032 /STRA=for			4401	3737.5	0.849239	0.456123		0.559418	0.846853
93238_at	275	476	514	436		439	107	389	452	425	355	183	273		UI-M-AI1-afk-b-07-0-UI.s1 Mus musculus cDNA, 3' end /clone=UI-M-AI1-afk-b-07-0-UI /clone_end=3' /gb=AI846822 /gi=5490728 /ug=Mm.5902 /len=269 /STRA=rev			425.25	361.167	0.849304	0.435354		0.641975	0.430335
96718_at	422	570	600	514		407	369	600	587	272	448	358	478		Mus musculus C184L-22 mRNA, complete cds /cds=UNKNOWN /gb=AB012727 /gi=6469043 /ug=Mm.27657 /len=2532 /STRA=for			526.5	447.167	0.849319	0.302924		0.907882	0.679962
101964_at	848	1224	842	796		525	685	716	831	995	975	948	658		Transketolase /cds=(91,1962) /gb=U05809 /gi=452485 /ug=Mm.9307 /len=2062 /STRA=for			927.5	787.833	0.849416	0.283568		0.709434	1.0221
102257_at	145	176	50	81		63	106	67	137	50	153	101	211		Mus musculus homeobox protein PKNOX1 (Pknox1) mRNA, complete cds /cds=(148,1455) /gb=AF061270 /gi=3126848 /ug=Mm.10799 /len=2540 /STRA=for			113	96	0.849558	0.604209		1.86726	0.893805
93851_at	51	77	89	70		70	70	76	50	50	50	61	50		uk04h07.y1 Mus musculus cDNA, 5' end /clone=IMAGE-1958461 /clone_end=5' /gb=AI272518 /gi=3894786 /ug=Mm.87216 /len=480 /STRA=for			71.75	61	0.850174	0.25984		0.696864	0.850174
100277_at	285	929	946	579		556	445	584	499	682	728	312	614		Inhibin beta-A /cds=(172,1446) /gb=X69619 /gi=50145 /ug=Mm.8042 /len=1529 /STRA=for			684.75	582.333	0.850432	0.473843		0.896678	0.455641
99136_at	68	125	61	50		50	57	66	115	50	50	50	50		Ufo oncogene homolog /cds=(4,2670) /gb=X63535 /gi=55121 /ug=Mm.4128 /len=4072 /STRA=for			76	64.6667	0.850877	0.558139		0.657895	0.657895
93137_at	50	72	50	63		50	50	50	50	50	50	50	50		Mus musculus brain neurotensin receptor mRNA, complete cds /cds=(26,1279) /gb=U51908 /gi=1622793 /ug=Mm.5153 /len=1554 /STRA=for			58.75	50	0.851064	0.0734772		0.851064	0.851064
104523_at	50	85	50	50		50	50	50	50	50	50	50	50		ub33b12.r1 Mus musculus cDNA, 5' end /clone=IMAGE-1379519 /clone_end=5' /gb=AI049391 /gi=3297678 /ug=Mm.22982 /len=509 /STRA=for			58.75	50	0.851064	0.241504		0.851064	0.851064
99371_at	50	50	85	50		50	50	50	50	50	50	50	50		Mus musculus potassium channel Kv4.3L mRNA, complete cds /cds=(0,1967) /gb=AF107781 /gi=4324644 /ug=Mm.56904 /len=1968 /STRA=for			58.75	50	0.851064	0.241504		0.851064	0.851064
104304_r_at	103	125	71	77		50	50	83	107	91	99	78	52		UI-M-BH2.1-apr-f-08-0-UI.s1 Mus musculus cDNA, 3' end /clone=UI-M-BH2.1-apr-f-08-0-UI /clone_end=3' /gb=AW124151 /gi=6099681 /ug=Mm.22358 /len=298 /STRA=for			94	80	0.851064	0.405463		0.553191	0.829787
95682_at	3809	4410	2717	3433		2327	2173	3641	3352	3455	3399	3495	3069		Mus musculus mRNA for XPE UV-damaged DNA binding factor, complete cds /cds=(81,3503) /gb=AB026432 /gi=5931595 /ug=Mm.29623 /len=4171 /STRA=for			3592.25	3057.83	0.851231	0.247578		0.854339	0.972928
101855_at	190	259	136	117		133	96	124	117	201	226	67	116		Microtubule-associated protein 6 /cds=(0,2720) /gb=Y14754 /gi=2769586 /ug=Mm.86654 /len=2721 /STRA=rev			175.5	149.5	0.851852	0.495946		0.660969	0.381766
102421_at	101	197	118	134		51	97	137	147	120	151	97	50		UI-M-AI1-afl-f-04-0-UI.s1 Mus musculus cDNA, 3' end /clone=UI-M-AI1-afl-f-04-0-UI /clone_end=3' /gb=AI847950 /gi=5491856 /ug=Mm.12787 /len=412 /STRA=for			137.5	117.167	0.852121	0.448263		0.363636	0.705455
102776_at	118	190	96	107		50	50	50	193	151	160	129	119		ud59b06.r1 Mus musculus cDNA, 5' end /clone=IMAGE-1450163 /clone_end=5' /gb=AI155095 /gi=3683564 /ug=Mm.13437 /len=120 /STRA=rev			127.75	109	0.853229	0.632225		0.931507	1.00978
92643_at	326	457	326	250		134	165	440	462	275	266	351	182		Neurofibromatosis 2 /cds=(576,2366) /gb=X74671 /gi=456656 /ug=Mm.1190 /len=2604 /STRA=for			339.75	290.333	0.85455	0.541024		0.535688	1.03311
103090_at	102	165	131	120		103	57	130	50	181	143	65	77		UI-M-AO0-acf-d-07-0-UI.s1 Mus musculus cDNA, 3' end /clone=UI-M-AO0-acf-d-07-0-UI /clone_end=3' /gb=AI838742 /gi=5472955 /ug=Mm.17392 /len=392 /STRA=for			129.5	110.667	0.854569	0.5207		0.594595	0.501931
98121_at	536	692	393	556		211	361	605	556	530	528	429	428		Farnesyltransferase, CAAX box, alpha /cds=(15,1148) /gb=D49744 /gi=1136744 /ug=Mm.3496 /len=1629 /STRA=for			544.25	465.167	0.854693	0.406331		0.786403	0.788241
104438_at	50	84	50	50		50	50	50	50	50	50	50	74		vz90h08.r1 Mus musculus cDNA, 5' end /clone=IMAGE-1344543 /clone_end=5' /gb=AI153791 /gi=3682260 /ug=Mm.2927 /len=403 /STRA=for			58.5	50	0.854701	0.241504		1.26496	0.854701
98339_at	50	84	50	50		50	50	50	50	50	50	50	50		Mus musculus mRNA for synaptotagmin XI, complete cds /cds=(0,1292) /gb=AB026808 /gi=6136793 /ug=Mm.43005 /len=1293 /STRA=for			58.5	50	0.854701	0.241504		0.854701	0.854701
93776_at	50	115	50	50		50	50	62	50	78	50	50	50		UI-M-BH2.1-apu-h-06-0-UI.s1 Mus musculus cDNA, 3' end /clone=UI-M-BH2.1-apu-h-06-0-UI /clone_end=3' /gb=AW124941 /gi=6100471 /ug=Mm.21214 /len=368 /STRA=for			66.25	56.6667	0.855346	0.516585		0.754717	0.754717
101499_at	372	932	597	426		340	371	600	555	572	548	437	373		Mus musculus integrin binding protein kinase mRNA, complete cds /cds=(113,1471) /gb=U94479 /gi=2739449 /ug=Mm.8131 /len=1750 /STRA=for			581.75	497.667	0.855465	0.485512		0.641169	0.751182
97808_at	371	211	314	329		285	220	288	324	218	238	534	226		UI-M-AJ1-ahf-d-05-0-UI.s2 Mus musculus cDNA, 3' end /clone=UI-M-AJ1-ahf-d-05-0-UI /clone_end=3' /gb=AI844532 /gi=5488438 /ug=Mm.28150 /len=521 /STRA=for			306.25	262.167	0.856054	0.240092		0.737959	1.74367
94893_at	68	76	50	98		59	69	50	50	97	50	86	82		UI-M-AH0-acv-h-03-0-UI.s1 Mus musculus cDNA, 3' end /clone=UI-M-AH0-acv-h-03-0-UI /clone_end=3' /gb=AI840411 /gi=5474624 /ug=Mm.23962 /len=435 /STRA=for			73	62.5	0.856164	0.417869		1.12329	1.17808
103879_at	106	196	256	233		121	50	280	225	108	232	81	50		vy96g05.r1 Mus musculus cDNA, 5' end /clone=IMAGE-1314104 /clone_end=5' /gb=AA914905 /gi=3054297 /ug=Mm.21186 /len=511 /STRA=for			197.75	169.333	0.8563	0.602214		0.252845	0.409608
99807_r_at	66	78	71	59		50	65	50	50	50	87	54	61		Friend virus susceptibility 1 /cds=(0,1322) /gb=X97720 /gi=1515301 /ug=Mm.57220 /len=1323 /STRA=for			68.5	58.6667	0.856448	0.272394		0.890511	0.788321
93602_at	789	1081	677	813		502	550	968	776	755	766	600	473		Mus musculus mitogen- and stress-activated protein kinase-2 (mMSK2) mRNA, complete cds /cds=(52,2373) /gb=AF074714 /gi=3786405 /ug=Mm.20914 /len=3120 /STRA=for			840	719.5	0.856548	0.305259		0.563095	0.714286
103414_at	244	317	241	177		113	158	291	389	146	161	218	165		Mus musculus major histocompatibility locus class III region- complement C4 (C4) and cytochrome P450 hydroxylase A (CYP21OH-A) genes, complete cds; slp pseudogene, complete sequence; NG6, SKI, and complement factor B (Bf) genes, comp /STRA=for			244.75	209.667	0.856656	0.569089		0.674157	0.890705
102047_at	1301	1078	489	919		515	613	1014	1035	922	769	940	677		Mus musculus N-myristoyltransferase 1 mRNA, complete cds /cds=(22,1512) /gb=AF043326 /gi=3005066 /ug=Mm.10265 /len=1548 /STRA=for			946.75	811.333	0.856967	0.460305		0.715078	0.99287
103060_at	58	80	50	50		50	50	50	50	56	50	53	50		UI-M-BH1-ann-d-11-0-UI.s1 Mus musculus cDNA, 3' end /clone=UI-M-BH1-ann-d-11-0-UI /clone_end=3' /gb=AW060519 /gi=6008270 /ug=Mm.1662 /len=350 /STRA=for			59.5	51	0.857143	0.177047		0.840336	0.890756
92911_at	50	50	50	95		65	50	50	50	50	50	50	73		M.musculus mRNA for cyclin A1 /cds=(111,1376) /gb=X84311 /gi=1107733 /ug=Mm.4815 /len=1590 /STRA=for			61.25	52.5	0.857143	0.380461		1.19184	0.816327
103393_at	85	109	50	50		50	50	56	122	50	50	71	50		vv67d07.r1 Mus musculus cDNA, 5' end /clone=IMAGE-1227469 /clone_end=5' /gb=AA738776 /gi=2776028 /ug=Mm.18659 /len=385 /STRA=for			73.5	63	0.857143	0.589537		0.680272	0.965986
96245_at	304	391	201	443		306	50	503	434	127	303	215	155		UI-M-BH2.1-apo-g-09-0-UI.s1 Mus musculus cDNA, 3' end /clone=UI-M-BH2.1-apo-g-09-0-UI /clone_end=3' /gb=AW124530 /gi=6100060 /ug=Mm.29810 /len=487 /STRA=for			334.75	287.167	0.857854	0.640282		0.463032	0.64227
103731_at	50	87	50	50		50	50	50	50	50	55	50	50		UI-M-AK0-adf-c-02-0-UI.s1 Mus musculus cDNA, 3' end /clone=UI-M-AK0-adf-c-02-0-UI /clone_end=3' /gb=AI837319 /gi=5471532 /ug=Mm.24309 /len=418 /STRA=rev			59.25	50.8333	0.857947	0.28748		0.843882	0.843882
103551_at	94	73	81	55		50	50	69	50	71	100	94	50		UI-M-BH2.1-aph-c-03-0-UI.s1 Mus musculus cDNA, 3' end /clone=UI-M-BH2.1-aph-c-03-0-UI /clone_end=3' /gb=AW124208 /gi=6099738 /ug=Mm.23813 /len=384 /STRA=for			75.75	65	0.858086	0.395348		0.660066	1.24092
101055_at	326	683	256	311		171	128	390	480	400	460	350	395		Protective protein for beta-galactosidase /cds=(213,1637) /gb=J05261 /gi=200492 /ug=Mm.7046 /len=1987 /STRA=for			394	338.167	0.858291	0.621986		1.00254	0.888325
93624_at	50	83	50	50		50	50	50	50	50	50	50	50		ue86b01.y1 Mus musculus cDNA, 5' end /clone=IMAGE-1497961 /clone_end=5' /gb=AI225296 /gi=3808357 /ug=Mm.7446 /len=418 /STRA=for			58.25	50	0.858369	0.241504		0.858369	0.858369
96838_at	213	311	164	223		69	115	322	176	266	225	266	136		UI-M-BH0-ajx-h-02-0-UI.s1 Mus musculus cDNA, 3' end /clone=UI-M-BH0-ajx-h-02-0-UI /clone_end=3' /gb=AI851223 /gi=5495129 /ug=Mm.29450 /len=369 /STRA=for			227.75	195.5	0.858397	0.566715		0.597146	1.16795
99532_at	312	231	112	207		87	102	228	242	226	225	113	107		Mouse DNA for tob family, complete cds /cds=(0,1091) /gb=D78382 /gi=1469158 /ug=Mm.4218 /len=1092 /STRA=for			215.5	185	0.858469	0.547167		0.49652	0.524362
92521_at	146	214	144	125		50	139	144	193	165	119	163	192		AT motif binding factor 1 /cds=(730,11910) /gb=D26046 /gi=1345407 /ug=Mm.4270 /len=12047 /STRA=for			157.25	135	0.858506	0.468382		1.22099	1.03657
93585_at	50	124	50	50		50	50	50	50	91	62	50	50		Cytochrome P450, 2c29 /cds=(7,1479) /gb=D17674 /gi=473716 /ug=Mm.20764 /len=1751 /STRA=for			68.5	58.8333	0.858881	0.582367		0.729927	0.729927
97469_at	50	63	72	70		50	71	58	50	50	50	50	50		vs67c01.x1 Mus musculus cDNA, 3' end /clone=IMAGE-1151328 /clone_end=3' /gb=AI645662 /gi=4724137 /ug=Mm.30539 /len=311 /STRA=for			63.75	54.8333	0.860131	0.167243		0.784314	0.784314
101425_at	293	217	203	117		86	118	260	231	232	144	156	165		Mus musculus glutathione synthetase type A1 mRNA, complete cds /cds=(19,1443) /gb=U35456 /gi=1016284 /ug=Mm.7504 /len=1857 /STRA=for			207.5	178.5	0.860241	0.549103		0.795181	0.751807
92581_at	158	361	209	221		51	124	226	409	227	188	135	185		Acetyl coenzyme A dehydrogenase, medium chain /cds=(7,1272) /gb=U07159 /gi=463908 /ug=Mm.10530 /len=1846 /STRA=for			237.25	204.167	0.860555	0.651958		0.779768	0.56902
98538_at	362	298	222	301		152	145	321	340	289	281	200	225		M.musculus mRNA for e1 protein /cds=UNKNOWN /gb=X81632 /gi=563507 /ug=Mm.35854 /len=3769 /STRA=for			295.75	254.667	0.861088	0.425562		0.760778	0.676247
94192_at	50	50	100	53		50	61	61	50	50	55	128	50		Mus musculus mRNA for ganglioside-induced differentiation associated protein 10 /cds=(2531,2917) /gb=Y17860 /gi=3378471 /ug=Mm.12950 /len=5011 /STRA=for			63.25	54.5	0.86166	0.410808		0.790514	2.02372
96949_at	491	569	461	432		303	285	474	447	476	540	610	290		UI-M-BH0-ajd-g-01-0-UI.s1 Mus musculus cDNA, 3' end /clone=UI-M-BH0-ajd-g-01-0-UI /clone_end=3' /gb=AI853542 /gi=5497448 /ug=Mm.30205 /len=110 /STRA=for			488.25	420.833	0.861922	0.274899		0.593958	1.24936
102570_at	50	88	81	95		92	50	72	55	87	50	50	50		Mus musculus thymic shared antigen-1 related sequence-1 (Tsa-1-rs1) pseudogene /cds=(0,311) /gb=U47850 /gi=1199651 /ug=Mm.57231 /len=312 /STRA=for			78.5	67.6667	0.861996	0.407624		0.636943	0.636943
97203_at	846	1211	1055	1252		805	506	1254	1100	1106	876	920	621		Mouse F52 mRNA for a novel protein /cds=UNKNOWN /gb=X61399 /gi=50943 /ug=Mm.2769 /len=1584 /STRA=for			1091	941.167	0.862664	0.363388		0.569203	0.843263
97265_at	50	132	50	50		50	50	50	115	50	50	50	50		UI-M-AI1-afn-e-12-0-UI.s1 Mus musculus cDNA, 3' end /clone=UI-M-AI1-afn-e-12-0-UI /clone_end=3' /gb=AI835060 /gi=5469273 /ug=Mm.27900 /len=540 /STRA=for			70.5	60.8333	0.862884	0.659334		0.70922	0.70922
97886_at	253	324	244	222		155	124	299	288	235	249	107	166		ui92c09.y1 Mus musculus cDNA, 5' end /clone=IMAGE-1889872 /clone_end=5' /gb=AI530375 /gi=4444510 /ug=Mm.28393 /len=474 /STRA=for			260.75	225	0.862895	0.400057		0.636625	0.410355
94980_at	104	121	72	97		74	51	88	122	122	53	92	125		ua70b05.r1 Mus musculus cDNA, 5' end /clone=IMAGE-1362801 /clone_end=5' /gb=AI006319 /gi=3215928 /ug=Mm.27275 /len=381 /STRA=for			98.5	85	0.862944	0.477058		1.26904	0.93401
101926_at	95	109	128	82		117	66	77	130	96	50	58	91		Mus musculus protein-serine/threonine kinase (pim-2) mRNA, complete cds /cds=UNKNOWN /gb=L41495 /gi=765065 /ug=Mm.932 /len=2039 /STRA=for			103.5	89.3333	0.863124	0.441338		0.879227	0.560386
103699_i_at	73	72	50	66		50	50	71	67	50	50	89	50		mt86b06.y1 Mus musculus cDNA, 5' end /clone=IMAGE-636755 /clone_end=5' /gb=AI646638 /gi=4725113 /ug=Mm.24029 /len=294 /STRA=rev			65.25	56.3333	0.863346	0.211601		0.766284	1.36398
103533_at	50	50	87	50		50	50	50	50	57	50	50	50		Hemoglobin beta, pseudogene bh3 /cds=(0,443) /gb=X14061 /gi=50150 /ug=Mm.2329 /len=444 /STRA=for			59.25	51.1667	0.863572	0.309938		0.843882	0.843882
103565_at	999	1389	457	1006		490	504	1139	1002	1006	849	837	678		UI-M-AQ1-adz-d-04-0-UI.s1 Mus musculus cDNA, 3' end /clone=UI-M-AQ1-adz-d-04-0-UI /clone_end=3' /gb=AI843358 /gi=5477571 /ug=Mm.1915 /len=444 /STRA=for			962.75	831.667	0.863845	0.543336		0.704233	0.869385
100389_at	128	191	230	201		186	162	170	138	164	152	75	158		Mus musculus acetylcholinesterase-associated collagen (COlQ) gene /cds=(0,710) /gb=AF021231 /gi=2460054 /ug=Mm.89475 /len=711 /STRA=for			187.5	162	0.864	0.214288		0.842667	0.4
99466_at	52	95	87	107		50	90	96	69	56	81	70	73		UI-M-AQ1-ady-b-05-0-UI.s1 Mus musculus cDNA, 3' end /clone=UI-M-AQ1-ady-b-05-0-UI /clone_end=3' /gb=AI845653 /gi=5489559 /ug=Mm.41128 /len=337 /STRA=for			85.25	73.6667	0.864125	0.408757		0.856305	0.821114
96348_at	153	151	213	181		121	161	149	176	181	117	127	161		UI-M-BH2.3-aok-d-10-0-UI.s1 Mus musculus cDNA, 3' end /clone=UI-M-BH2.3-aok-d-10-0-UI /clone_end=3' /gb=AW121217 /gi=6096550 /ug=Mm.29998 /len=454 /STRA=for			174.5	150.833	0.864374	0.225113		0.922636	0.727794
95426_at	123	140	84	71		50	50	179	115	98	50	98	50		UI-M-BH1-alj-h-09-0-UI.s1 Mus musculus cDNA, 3' end /clone=UI-M-BH1-alj-h-09-0-UI /clone_end=3' /gb=AW048512 /gi=5909041 /ug=Mm.24452 /len=362 /STRA=for			104.5	90.3333	0.864434	0.642402		0.478469	0.937799
96018_r_at	101	79	94	90		71	80	64	82	75	100	78	85		UI-M-BH0-ajd-h-09-0-UI.s1 Mus musculus cDNA, 3' end /clone=UI-M-BH0-ajd-h-09-0-UI /clone_end=3' /gb=AI853561 /gi=5497467 /ug=Mm.25634 /len=480 /STRA=for			91	78.6667	0.864469	0.127353		0.934066	0.857143
95001_at	197	236	146	172		64	94	254	201	189	172	194	84		Mus musculus AKAP95 mRNA for A kinase anchor protein 95, complete cds /cds=(38,2101) /gb=AB028920 /gi=5931617 /ug=Mm.27351 /len=2704 /STRA=for			187.75	162.333	0.864625	0.534512		0.447403	1.03329
96055_at	453	764	371	418		281	426	624	777	349	145	609	667		Cholecystokinin /cds=(64,411) /gb=X59520 /gi=50316 /ug=Mm.2619 /len=559 /STRA=for			501.5	433.667	0.864739	0.635138		1.33001	1.21436
93058_at	391	837	507	472		202	275	661	641	476	608	480	327		Mus musculus eIF-1A (eIF-1A) mRNA, complete cds /cds=(1172,1606) /gb=AF026481 /gi=3746339 /ug=Mm.1540 /len=2663 /STRA=for			551.75	477.167	0.864824	0.573363		0.59266	0.869959
104168_at	111	199	107	146		71	62	123	108	211	156	90	107		vu08c05.r1 Mus musculus cDNA, 5' end /clone=IMAGE-1180040 /clone_end=5' /gb=AA791742 /gi=2854697 /ug=Mm.27189 /len=594 /STRA=for			140.75	121.833	0.865601	0.582333		0.760213	0.639432
101346_at	69	91	54	77		72	50	57	63	73	63	50	50		Mus musculus mRNA for IgM/kappa antibody, scFvGUS-CK /cds=(0,839) /gb=Z95476 /gi=2108308 /ug=Mm.57014 /len=840 /STRA=for			72.75	63	0.865979	0.23424		0.687285	0.687285
96268_at	418	585	477	533		282	276	498	655	471	433	551	465		UI-M-AK0-adk-e-11-0-UI.s1 Mus musculus cDNA, 3' end /clone=UI-M-AK0-adk-e-11-0-UI /clone_end=3' /gb=AI840979 /gi=5475192 /ug=Mm.29845 /len=405 /STRA=for			503.25	435.833	0.866037	0.41461		0.923994	1.09488
104303_i_at	137	179	88	94		50	51	150	124	143	129	133	60		UI-M-BH2.1-apr-f-08-0-UI.s1 Mus musculus cDNA, 3' end /clone=UI-M-BH2.1-apr-f-08-0-UI /clone_end=3' /gb=AW124151 /gi=6099681 /ug=Mm.22358 /len=298 /STRA=for			124.5	107.833	0.866131	0.575912		0.481928	1.06827
94424_at	69	249	69	121		112	63	107	144	50	184	109	54		UI-M-BH1-amy-c-04-0-UI.s1 Mus musculus cDNA, 3' end /clone=UI-M-BH1-amy-c-04-0-UI /clone_end=3' /gb=AW048712 /gi=5909241 /ug=Mm.26304 /len=527 /STRA=for			127	110	0.866142	0.697238		0.425197	0.858268
95140_at	322	454	322	274		117	208	430	419	303	306	250	184		UI-M-AN1-afg-b-01-0-UI.s1 Mus musculus cDNA, 3' end /clone=UI-M-AN1-afg-b-01-0-UI /clone_end=3' /gb=AI842068 /gi=5476281 /ug=Mm.29436 /len=397 /STRA=for			343	297.167	0.866375	0.524242		0.536443	0.728863
100959_at	133	250	124	107		84	114	125	116	162	197	130	310		M.musculus mRNA for S100 calcium-binding protein A13 /cds=(60,356) /gb=X99921 /gi=1694840 /ug=Mm.6523 /len=440 /STRA=for			153.5	133	0.86645	0.55089		2.01954	0.846906
100335_at	50	50	100	50		50	60	50	65	50	50	50	50		ATPase, Cu++ transporting, beta polypeptide /cds=(162,4550) /gb=U38477 /gi=1209656 /ug=Mm.87854 /len=4854 /STRA=for			62.5	54.1667	0.866667	0.448122		0.8	0.8
96208_at	316	407	416	365		191	207	412	399	344	403	279	192		UI-M-BH2.1-aqb-c-04-0-UI.s1 Mus musculus cDNA, 3' end /clone=UI-M-BH2.1-aqb-c-04-0-UI /clone_end=3' /gb=AW123514 /gi=6099044 /ug=Mm.28646 /len=374 /STRA=for			376	326	0.867021	0.388173		0.510638	0.742021
92656_at	53	50	93	60		50	62	50	71	50	50	63	55		Mus musculus MHC class III region RD gene, partial cds; Bf, C2, G9A, NG22, G9, HSP70, HSP70, HSC70t, and smRNP genes, complete cds; G7A gene, partial cds; and unknown genes /cds=(0,1379) /gb=AF109906 /gi=3986763 /ug=Mm.44161 /len=138 /STRA=for			64	55.5	0.867188	0.375818		0.859375	0.984375
99924_at	396	247	161	339		196	280	311	253	283	164	275	224		UI-M-BH2.3-aoi-a-09-0-UI.s1 Mus musculus cDNA, 3' end /clone=UI-M-BH2.3-aoi-a-09-0-UI /clone_end=3' /gb=AW121845 /gi=6097219 /ug=Mm.43167 /len=418 /STRA=for			285.75	247.833	0.867308	0.470257		0.783902	0.96238
104560_at	227	264	210	259		247	126	240	228	253	155	269	197		UI-M-BH2.2-aqj-h-11-0-UI.s1 Mus musculus cDNA, 3' end /clone=UI-M-BH2.2-aqj-h-11-0-UI /clone_end=3' /gb=AW125634 /gi=6101164 /ug=Mm.23827 /len=447 /STRA=for			240	208.167	0.867361	0.309278		0.820833	1.12083
102976_at	139	188	66	104		86	85	183	154	65	74	161	50		Breast cancer 1 /cds=(116,5554) /gb=U32446 /gi=969171 /ug=Mm.1889 /len=5555 /STRA=for			124.25	107.833	0.867874	0.623384		0.402414	1.29577
102875_at	50	84	54	50		50	50	50	60	50	50	50	65		UI-M-AN0-aci-f-04-0-UI.s1 Mus musculus cDNA, 3' end /clone=UI-M-AN0-aci-f-04-0-UI /clone_end=3' /gb=AI840487 /gi=5474700 /ug=Mm.14864 /len=380 /STRA=for			59.5	51.6667	0.868347	0.284233		1.09244	0.840336
93492_at	399	351	579	676		594	399	431	424	410	354	355	716		Mus musculus CLM2 gene for cytohesin 2, complete and partial cds, alternative splicing /cds=(0,1154) /gb=AB013469 /gi=3660542 /ug=Mm.19097 /len=1155 /STRA=for			501.25	435.333	0.868495	0.395538		1.42843	0.708229
101481_at	67	100	50	50		50	50	50	50	71	77	102	50		UI-M-BH0-aiw-g-04-0-UI.s1 Mus musculus cDNA, 3' end /clone=UI-M-BH0-aiw-g-04-0-UI /clone_end=3' /gb=AI852555 /gi=5496461 /ug=Mm.7780 /len=351 /STRA=for			66.75	58	0.868914	0.461099		0.749064	1.52809
104261_at	78	101	97	50		74	72	50	68	60	101	89	68		vn82b03.r1 Mus musculus cDNA, 5' end /clone=IMAGE-1038413 /clone_end=5' /gb=AA624493 /gi=2528369 /ug=Mm.28424 /len=478 /STRA=rev			81.5	70.8333	0.869121	0.426003		0.834356	1.09202
101584_at	425	980	511	374		245	250	690	494	597	710	308	460		M.musculus RSP-1 mRNA for p33 protein /cds=(34,867) /gb=X63039 /gi=54014 /ug=Mm.905 /len=1327 /STRA=for			572.5	497.667	0.869287	0.637406		0.803493	0.537991
92873_f_at	50	90	50	50		50	50	63	50	50	50	50	50		Mouse mRNA for preprotrypsin (ta) /cds=(16,756) /gb=X04574 /gi=54918 /ug=Mm.14410 /len=814 /STRA=for			60	52.1667	0.869444	0.376001		0.833333	0.833333
103643_at	312	318	180	278		50	129	335	364	259	282	253	146		UI-M-AL1-ahq-g-12-0-UI.s1 Mus musculus cDNA, 3' end /clone=UI-M-AL1-ahq-g-12-0-UI /clone_end=3' /gb=AI844784 /gi=5488690 /ug=Mm.20387 /len=264 /STRA=rev			272	236.5	0.869485	0.612421		0.536765	0.930147
95661_at	969	1360	1131	1194		729	799	1124	1246	1047	1125	808	556		CD9 antigen /cds=(54,734) /gb=L08115 /gi=388911 /ug=Mm.2956 /len=1130 /STRA=for			1163.5	1011.67	0.869503	0.248075		0.477869	0.694456
98862_at	50	80	50	50		50	50	50	50	50	50	50	50		Mus musculus Wnt10a mRNA, complete cds /cds=(662,1915) /gb=U61969 /gi=1546012 /ug=Mm.5130 /len=2487 /STRA=rev			57.5	50	0.869565	0.241504		0.869565	0.869565
104312_at	70	106	50	50		50	64	66	74	50	56	68	50		UI-M-BH2.1-apg-f-03-0-UI.s1 Mus musculus cDNA, 3' end /clone=UI-M-BH2.1-apg-f-03-0-UI /clone_end=3' /gb=AW123271 /gi=6098801 /ug=Mm.2240 /len=363 /STRA=for			69	60	0.869565	0.457827		0.724638	0.985507
100460_at	146	185	79	119		72	87	139	168	89	135	128	89		TPR-containing, SH2-binding phosphoprotein /cds=(134,3655) /gb=L49502 /gi=1236238 /ug=Mm.489 /len=4201 /STRA=rev			132.25	115	0.869565	0.527196		0.672968	0.967864
96293_at	312	304	229	390		287	271	400	281	199	173	347	109		UI-M-AQ1-aed-b-08-0-UI.s1 Mus musculus cDNA, 3' end /clone=UI-M-AQ1-aed-b-08-0-UI /clone_end=3' /gb=AI842600 /gi=5476813 /ug=Mm.29898 /len=329 /STRA=for			308.75	268.5	0.869636	0.42859		0.353036	1.12389
97891_at	89	109	55	118		50	50	142	90	102	50	117	50		UI-M-AH1-agt-d-10-0-UI.s1 Mus musculus cDNA, 3' end /clone=UI-M-AH1-agt-d-10-0-UI /clone_end=3' /gb=AI849500 /gi=5493406 /ug=Mm.28413 /len=375 /STRA=for			92.75	80.6667	0.869721	0.601143		0.539084	1.26146
96829_at	433	663	285	327		189	198	532	460	408	442	368	318		UI-M-BH1-alr-f-05-0-UI.s1 Mus musculus cDNA, 3' end /clone=UI-M-BH1-alr-f-05-0-UI /clone_end=3' /gb=AW047083 /gi=5907612 /ug=Mm.29398 /len=311 /STRA=rev			427	371.5	0.870023	0.591401		0.744731	0.861827
93120_f_at	1384	1686	1153	1389		769	1054	1463	1546	1293	1201	928	1050		Mus musculus H-2K gene for MHC class I antigen H-2K (allele b), exons 1 to 3 and joined CDS /cds=(0,1109) /gb=V00746 /gi=51154 /ug=Mm.16771 /len=1110 /STRA=rev			1403	1221	0.870278	0.311565		0.748396	0.66144
95103_at	207	234	133	212		61	129	222	290	137	188	177	134		UI-M-AN0-acq-c-09-0-UI.s1 Mus musculus cDNA, 3' end /clone=UI-M-AN0-acq-c-09-0-UI /clone_end=3' /gb=AI839824 /gi=5474002 /ug=Mm.29348 /len=481 /STRA=for			196.5	171.167	0.871077	0.584004		0.681934	0.900763
99606_at	103	182	118	144		57	50	157	171	141	139	128	146		LIM motif-containing protein kinase 2 /cds=(355,2208) /gb=AB005132 /gi=2804552 /ug=Mm.42927 /len=3688 /STRA=for			136.75	119.167	0.87142	0.573391		1.06764	0.936015
99643_f_at	1212	1368	921	933		571	772	1044	951	1246	1217	684	917		Mouse mRNA for carboxypeptidase H /cds=(39,1472) /gb=X61232 /gi=50312 /ug=Mm.43603 /len=1992 /STRA=for			1108.5	966.833	0.8722	0.398931		0.827244	0.61705
98106_at	235	353	151	375		119	243	300	280	264	252	402	264		Mus musculus translocase of inner mitochondrial membrane (Tim44) mRNA, nuclear gene encoding mitochondrial protein, complete cds /cds=(8,1366) /gb=U69898 /gi=2351409 /ug=Mm.34791 /len=1764 /STRA=for			278.5	243	0.872531	0.520306		0.947935	1.44345
96491_at	109	109	72	95		50	98	101	99	50	106	65	57		ue19f09.x1 Mus musculus cDNA, 3' end /clone=IMAGE-1480841 /clone_end=3' /gb=AI035632 /gi=3259323 /ug=Mm.25185 /len=768 /STRA=for			96.25	84	0.872727	0.442828		0.592208	0.675325
104277_at	178	306	178	230		50	112	274	296	254	182	159	128		UI-M-AM0-ads-a-05-0-UI.s1 Mus musculus cDNA, 3' end /clone=UI-M-AM0-ads-a-05-0-UI /clone_end=3' /gb=AI834815 /gi=5468993 /ug=Mm.22218 /len=168 /STRA=for			223	194.667	0.872945	0.623052		0.573991	0.713004
94063_at	81	424	58	67		50	101	179	153	147	195	72	55		M.musculus mRNA for semaphorin B /cds=(65,2347) /gb=X85991 /gi=854325 /ug=Mm.22061 /len=3046 /STRA=for			157.5	137.5	0.873016	0.797664		0.349206	0.457143
101934_at	261	570	553	250		351	124	326	328	552	459	119	230		UI-M-BH0-ajx-a-08-0-UI.s1 Mus musculus cDNA, 3' end /clone=UI-M-BH0-ajx-a-08-0-UI /clone_end=3' /gb=AI851119 /gi=5495065 /ug=Mm.946 /len=354 /STRA=for			408.5	356.667	0.873113	0.623881		0.563035	0.29131
99188_at	312	439	281	366		168	307	384	284	362	326	299	339		vn96a04.r1 Mus musculus cDNA, 5' end /clone=IMAGE-1039758 /clone_end=5' /gb=AA615161 /gi=2502389 /ug=Mm.41890 /len=495 /STRA=for			349.5	305.167	0.873152	0.379031		0.969957	0.855508
103862_r_at	500	599	352	408		322	333	400	636	408	336	362	503		vc88g07.r1 Mus musculus cDNA, 5' end /clone=IMAGE-790140 /clone_end=5' /gb=AA388099 /gi=2041044 /ug=Mm.21103 /len=564 /STRA=for			464.75	405.833	0.873229	0.449501		1.0823	0.778913
95627_at	174	105	129	163		118	98	109	99	168	156	203	182		UI-M-BH1-akv-b-03-0-UI.s1 Mus musculus cDNA, 3' end /clone=UI-M-BH1-akv-b-03-0-UI /clone_end=3' /gb=AW046038 /gi=5906567 /ug=Mm.28060 /len=433 /STRA=for			142.75	124.667	0.873322	0.387568		1.27496	1.42207
95034_f_at	210	468	159	266		95	146	341	345	283	235	292	151		uo84d09.x1 Mus musculus cDNA, 3' end /clone=IMAGE-2649233 /clone_end=3' /gb=AW212243 /gi=6518272 /ug=Mm.27546 /len=250 /STRA=for			275.75	240.833	0.873376	0.653894		0.547597	1.05893
103082_at	263	238	217	210		143	128	259	278	210	198	269	156		UI-M-AM1-afv-a-08-0-UI.s1 Mus musculus cDNA, 3' end /clone=UI-M-AM1-afv-a-08-0-UI /clone_end=3' /gb=AI847507 /gi=5491413 /ug=Mm.17173 /len=313 /STRA=for			232	202.667	0.873563	0.387316		0.672414	1.15948
101487_f_at	2208	2639	1296	2277		1005	1109	2760	2563	2243	1364	1792	997		Mus musculus thymic shared antigen-1 (TSA-1) gene, complete cds /cds=(106,498) /gb=U47737 /gi=1199649 /ug=Mm.788 /len=1117 /STRA=for			2105	1840.67	0.874426	0.577017		0.473634	0.851306
100475_at	187	299	119	189		56	86	257	299	176	168	114	90		Zinc finger protein 147 /cds=(9,1913) /gb=D63902 /gi=1088466 /ug=Mm.4973 /len=5475 /STRA=rev			198.5	173.667	0.874895	0.670842		0.453401	0.574307
100331_g_at	2029	2255	1511	2128		1189	1482	2143	2046	1956	1583	1862	1744		Mus musculus type II peroxiredoxin protein 2 (PrxII-2) pseudogene, complete sequence /cds=(0,596) /gb=AF032714 /gi=3603231 /ug=Mm.87831 /len=597 /STRA=for			1980.75	1733.17	0.875005	0.313436		0.880475	0.940048
99677_at	128	168	66	126		58	50	111	145	99	178	62	105		UI-M-AH1-agr-b-09-0-UI.s1 Mus musculus cDNA, 3' end /clone=UI-M-AH1-agr-b-09-0-UI /clone_end=3' /gb=AI849559 /gi=5493465 /ug=Mm.44218 /len=371 /STRA=for			122	106.833	0.875683	0.629124		0.860656	0.508197
97237_at	475	737	381	396		183	238	662	597	461	473	324	237		UI-M-AK0-adl-d-01-0-UI.s1 Mus musculus cDNA, 3' end /clone=UI-M-AK0-adl-d-01-0-UI /clone_end=3' /gb=AI837771 /gi=5471989 /ug=Mm.27831 /len=480 /STRA=for			497.25	435.667	0.876152	0.613658		0.476621	0.651584
100609_at	50	79	50	50		50	50	51	50	50	50	50	53		Mus musculus major histocompatibility locus class III region- complement C4 (C4) and cytochrome P450 hydroxylase A (CYP21OH-A) genes, complete cds; slp pseudogene, complete sequence; NG6, SKI, and complement factor B (Bf) genes, comp /STRA=rev			57.25	50.1667	0.876274	0.251864		0.925764	0.873362
104155_f_at	72	74	50	176		64	50	50	50	195	80	50	50		Mus musculus transcription factor LRG-21 mRNA, complete cds /cds=(167,712) /gb=U19118 /gi=633751 /ug=Mm.2706 /len=1897 /STRA=for			93	81.5	0.876344	0.761347		0.537634	0.537634
98589_at	1034	1834	1522	1496		1384	883	1087	891	1608	1885	540	1161		Adipose differentiation related protein /cds=(78,1355) /gb=M93275 /gi=191692 /ug=Mm.381 /len=1680 /STRA=for			1471.5	1289.67	0.87643	0.479851		0.788991	0.366972
98438_f_at	1107	1255	625	833		474	795	989	1056	935	777	537	681		Mouse Q4 class I MHC gene (exon 5) /cds=(0,91) /gb=X16202 /gi=53862 /ug=Mm.34421 /len=116 /STRA=for			955	837.667	0.877138	0.46767		0.713089	0.562304
104089_at	239	375	200	205		87	74	329	329	238	284	296	55		UI-M-BH1-alg-h-10-0-UI.s1 Mus musculus cDNA, 3' end /clone=UI-M-BH1-alg-h-10-0-UI /clone_end=3' /gb=AW045664 /gi=5906193 /ug=Mm.21798 /len=443 /STRA=for			254.75	223.5	0.877331	0.655386		0.215898	1.16192
100308_at	529	373	407	512		382	287	436	359	530	403	261	404		M.musculus col8a1 gene, exon 1 (and joined CDS) /cds=(0,2231) /gb=X66976 /gi=50493 /ug=Mm.86813 /len=2232 /STRA=for			455.25	399.5	0.87754	0.309707		0.887424	0.573311
102398_at	125	136	248	50		142	97	128	189	125	55	135	50		Retinoid X receptor beta /cds=(104,1336) /gb=D21831 /gi=987668 /ug=Mm.1243 /len=2200 /STRA=for			139.75	122.667	0.877758	0.677276		0.357782	0.966011
94853_at	460	527	309	284		279	269	350	333	405	445	288	186		Guanine nucleotide binding protein, beta 1 /cds=(39,1061) /gb=U29055 /gi=868168 /ug=Mm.2344 /len=1410 /STRA=for			395	346.833	0.878059	0.432606		0.470886	0.729114
101960_at	372	892	494	354		151	288	526	614	574	629	420	315		UI-M-AI1-afm-f-10-0-UI.s1 Mus musculus cDNA, 3' end /clone=UI-M-AI1-afm-f-10-0-UI /clone_end=3' /gb=AI842208 /gi=5476421 /ug=Mm.9257 /len=382 /STRA=for			528	463.667	0.878157	0.660809		0.596591	0.795455
104648_at	80	50	69	50		50	50	60	50	68	50	175	50		UI-M-AJ1-ahh-c-06-0-UI.s2 Mus musculus cDNA, 3' end /clone=UI-M-AJ1-ahh-c-06-0-UI /clone_end=3' /gb=AI844597 /gi=5488508 /ug=Mm.31392 /len=304 /STRA=for			62.25	54.6667	0.878179	0.313402		0.803213	2.81124
98848_at	50	102	50	50		50	50	81	51	50	50	56	71		Mus musculus SH3-containing protein SH3P3 mRNA, partial cds /cds=(0,527) /gb=U58889 /gi=1407664 /ug=Mm.5068 /len=780 /STRA=for			63	55.3333	0.878307	0.544598		1.12698	0.888889
98129_at	3575	4575	3558	3446		2912	2248	3242	3489	3936	4146	2707	3221		UI-M-BH0-aiw-g-02-0-UI.s1 Mus musculus cDNA, 3' end /clone=UI-M-BH0-aiw-g-02-0-UI /clone_end=3' /gb=AI852553 /gi=5496459 /ug=Mm.3532 /len=276 /STRA=for			3788.5	3328.83	0.878668	0.296047		0.850205	0.714531
97838_at	1483	2394	1342	1450		866	723	1982	1892	1647	1683	2139	679		vr02b07.r1 Mus musculus cDNA, 5' end /clone=IMAGE-1110613 /clone_end=5' /gb=AA684508 /gi=2670225 /ug=Mm.28239 /len=398 /STRA=for			1667.25	1465.5	0.878992	0.563691		0.407257	1.28295
93327_at	198	196	149	113		133	72	146	135	173	206	75	86		UI-M-AO1-aeo-a-02-0-UI.s1 Mus musculus cDNA, 3' end /clone=UI-M-AO1-aeo-a-02-0-UI /clone_end=3' /gb=AI842665 /gi=5476878 /ug=Mm.186 /len=288 /STRA=for			164	144.167	0.879065	0.499242		0.52439	0.457317
97239_at	67	50	50	62		50	50	50	52	50	50	50	53		UI-M-BG0-ahs-a-04-0-UI.s1 Mus musculus cDNA, 3' end /clone=UI-M-BG0-ahs-a-04-0-UI /clone_end=3' /gb=AI845106 /gi=5489012 /ug=Mm.27839 /len=141 /STRA=for			57.25	50.3333	0.879185	0.078588		0.925764	0.873362
103450_at	50	79	50	50		50	50	50	52	50	50	50	50		mj31b05.r1 Mus musculus cDNA, 5' end /clone=IMAGE-477681 /clone_end=5' /gb=AA061133 /gi=1554949 /ug=Mm.21593 /len=432 /STRA=for			57.25	50.3333	0.879185	0.263156		0.873362	0.873362
100527_at	449	460	262	548		230	304	553	496	414	270	280	253		UI-M-BH2.1-aqa-d-10-0-UI.s1 Mus musculus cDNA, 3' end /clone=UI-M-BH2.1-aqa-d-10-0-UI /clone_end=3' /gb=AW124744 /gi=6100274 /ug=Mm.52 /len=485 /STRA=for			429.75	377.833	0.879193	0.543091		0.588714	0.651542
97242_at	144	253	328	291		73	110	372	163	230	392	294	157		UI-M-AJ1-ahd-g-01-0-UI.s1 Mus musculus cDNA, 3' end /clone=UI-M-AJ1-ahd-g-01-0-UI /clone_end=3' /gb=AI849011 /gi=5492917 /ug=Mm.27841 /len=467 /STRA=for			254	223.333	0.879265	0.694179		0.61811	1.15748
97264_r_at	91	63	50	81		50	74	50	50	102	50	81	50		UI-M-AK1-aez-f-02-0-UI.s1 Mus musculus cDNA, 3' end /clone=UI-M-AK1-aez-f-02-0-UI /clone_end=3' /gb=AI846289 /gi=5490195 /ug=Mm.27899 /len=375 /STRA=for			71.25	62.6667	0.879532	0.532357		0.701754	1.13684
97253_at	109	157	75	88		51	50	99	74	138	154	98	74		UI-M-BG1-aic-c-07-0-UI.s1 Mus musculus cDNA, 3' end /clone=UI-M-BG1-aic-c-07-0-UI /clone_end=3' /gb=AI854343 /gi=5498249 /ug=Mm.27872 /len=305 /STRA=for			107.25	94.3333	0.879565	0.64087		0.689977	0.913753
101973_at	1146	1989	1398	1563		829	826	1404	1548	2009	1434	1411	1066		Mus musculus mRNA for mrg1 protein /cds=(219,1028) /gb=Y15163 /gi=3059126 /ug=Mm.9524 /len=1943 /STRA=for			1524	1341.67	0.880359	0.519371		0.699475	0.925853
96946_at	175	165	99	166		50	84	179	172	145	169	315	76		UI-M-BH2.1-aqb-b-08-0-UI.s1 Mus musculus cDNA, 3' end /clone=UI-M-BH2.1-aqb-b-08-0-UI /clone_end=3' /gb=AW123507 /gi=6099037 /ug=Mm.30198 /len=447 /STRA=for			151.25	133.167	0.880441	0.571798		0.502479	2.08264
93863_f_at	57	54	82	75		50	50	50	50	65	89	77	103		Mus musculus 129 cryptdin-6 (Defcr6) gene /cds=(45,326) /gb=U03003 /gi=2182214 /ug=Mm.87755 /len=336 /STRA=for			67	59	0.880597	0.434817		1.53731	1.14925
94282_at	341	579	314	391		80	203	389	325	573	577	350	392		UI-M-BH2.1-apq-c-02-0-UI.s1 Mus musculus cDNA, 3' end /clone=UI-M-BH2.1-apq-c-02-0-UI /clone_end=3' /gb=AW124297 /gi=6099827 /ug=Mm.22547 /len=237 /STRA=for			406.25	357.833	0.880821	0.676659		0.964923	0.861538
94052_at	487	814	573	440		488	312	605	617	394	642	319	339		Mus musculus mRNA for DPM2, complete cds /cds=(24,278) /gb=AB013360 /gi=3790360 /ug=Mm.22001 /len=279 /STRA=for			578.5	509.667	0.881014	0.490344		0.585998	0.551426
96804_at	579	997	561	688		352	329	927	813	650	666	567	348		UI-M-BH0-aka-g-11-0-UI.s1 Mus musculus cDNA, 3' end /clone=UI-M-BH0-aka-g-11-0-UI /clone_end=3' /gb=AI854811 /gi=5498717 /ug=Mm.29203 /len=366 /STRA=rev			706.25	622.833	0.881888	0.585186		0.492743	0.802832
101498_at	127	280	139	160		78	93	189	210	181	183	179	142		Mus musculus lithium-sensitive myo-inositol monophosphatase A1 (IMPA1) mRNA, complete cds /cds=(66,899) /gb=AF042730 /gi=2801800 /ug=Mm.8089 /len=2167 /STRA=for			176.5	155.667	0.881964	0.613921		0.804533	1.01416
94325_at	907	1057	553	684		116	338	1073	1164	809	735	492	316		UI-M-BH2.1-apu-g-09-0-UI.s1 Mus musculus cDNA, 3' end /clone=UI-M-BH2.1-apu-g-09-0-UI /clone_end=3' /gb=AW124932 /gi=6100462 /ug=Mm.22675 /len=143 /STRA=for			800.25	705.833	0.882016	0.688693		0.394877	0.614808
94276_at	878	1337	871	746		574	459	947	840	1125	1125	550	597		Mus musculus putative steroid dehydrogenase (KIK-I) mRNA, complete cds /cds=(19,957) /gb=AF064635 /gi=3142701 /ug=Mm.22505 /len=978 /STRA=for			958	845	0.882046	0.537961		0.623173	0.574113
97250_at	1379	1377	1282	1293		690	913	1311	1495	1364	1281	1369	1245		UI-M-BH1-amr-f-01-0-UI.s1 Mus musculus cDNA, 3' end /clone=UI-M-BH1-amr-f-01-0-UI /clone_end=3' /gb=AW049326 /gi=5909855 /ug=Mm.27858 /len=234 /STRA=for			1332.75	1175.67	0.882136	0.349557		0.934159	1.0272
96284_at	487	1017	532	653		317	410	757	708	716	652	576	544		UI-M-BH2.2-aon-d-06-0-UI.s1 Mus musculus cDNA, 3' end /clone=UI-M-BH2.2-aon-d-06-0-UI /clone_end=3' /gb=AW121446 /gi=6096779 /ug=Mm.29873 /len=220 /STRA=for			672.25	593.333	0.882608	0.570429		0.809223	0.856824
98437_at	894	1091	707	793		303	489	1171	1092	704	856	831	288		Mus musculus CPP32 apoptotic protease mRNA, partial cds /cds=(0,662) /gb=U63720 /gi=4097524 /ug=Mm.34405 /len=1609 /STRA=for			871.25	769.167	0.882831	0.595627		0.33056	0.953802
98944_at	419	626	280	300		159	127	449	477	501	440	435	156		UI-M-AH1-ago-c-12-0-UI.s1 Mus musculus cDNA, 3' end /clone=UI-M-AH1-ago-c-12-0-UI /clone_end=3' /gb=AI848343 /gi=5492249 /ug=Mm.28704 /len=491 /STRA=for			406.25	358.833	0.883282	0.668298		0.384	1.07077
94929_at	360	329	221	191		152	181	286	331	263	246	303	155		Mouse tyrosine phosphatase (PTP-1), (EC2.7.1.112) mRNA /cds=UNKNOWN /gb=M97590 /gi=200581 /ug=Mm.2668 /len=1664 /STRA=for			275.25	243.167	0.883439	0.513284		0.563124	1.10082
99080_at	234	416	273	221		144	112	291	291	304	374	183	114		UI-M-BH0-aju-g-05-0-UI.s1 Mus musculus cDNA, 3' end /clone=UI-M-BH0-aju-g-05-0-UI /clone_end=3' /gb=AI853930 /gi=5497836 /ug=Mm.3886 /len=442 /STRA=for			286	252.667	0.88345	0.61037		0.398601	0.63986
95477_at	972	922	620	573		400	571	1020	704	749	647	681	494		UI-M-BH2.1-apz-g-10-0-UI.s1 Mus musculus cDNA, 3' end /clone=UI-M-BH2.1-apz-g-10-0-UI /clone_end=3' /gb=AW125185 /gi=6100715 /ug=Mm.24847 /len=215 /STRA=for			771.75	681.833	0.88349	0.516776		0.640104	0.88241
96075_at	752	1664	938	614		779	653	1081	865	844	1037	598	728		UI-M-BH1-amx-g-07-0-UI.s1 Mus musculus cDNA, 3' end /clone=UI-M-BH1-amx-g-07-0-UI /clone_end=3' /gb=AW060876 /gi=6008627 /ug=Mm.2654 /len=472 /STRA=for			992	876.5	0.883569	0.583121		0.733871	0.602823
94304_at	270	436	223	328		234	281	313	293	334	211	278	381		Annexin VI, p68 /cds=(33,2054) /gb=X13460 /gi=53580 /ug=Mm.22619 /len=2402 /STRA=for			314.25	277.667	0.883585	0.42468		1.21241	0.884646
100986_at	588	1131	999	834		588	548	583	1185	992	813	711	680		Mus musculus LIM protein FHL2 (Fhl2) mRNA, complete cds /cds=(11,850) /gb=AF055889 /gi=3025852 /ug=Mm.6799 /len=1300 /STRA=for			888	784.833	0.883821	0.541952		0.765766	0.800676
95023_at	250	575	385	503		388	319	490	366	386	322	248	362		UI-M-BH1-ang-d-12-0-UI.s1 Mus musculus cDNA, 3' end /clone=UI-M-BH1-ang-d-12-0-UI /clone_end=3' /gb=AW050353 /gi=5910882 /ug=Mm.27490 /len=514 /STRA=for			428.25	378.5	0.88383	0.463654		0.845301	0.579101
101905_at	800	1157	898	1045		680	713	889	1178	953	758	917	796		Itchy /cds=(149,2713) /gb=AF037454 /gi=2827197 /ug=Mm.8975 /len=5122 /STRA=for			975	861.833	0.883932	0.349989		0.81641	0.940513
98120_at	635	509	387	502		355	316	558	553	470	444	314	298		UI-M-AH1-agx-b-03-0-UI.s1 Mus musculus cDNA, 3' end /clone=UI-M-AH1-agx-b-03-0-UI /clone_end=3' /gb=AI844807 /gi=5488713 /ug=Mm.34951 /len=517 /STRA=for			508.25	449.333	0.884079	0.389452		0.586326	0.617806
94983_at	53	188	50	58		50	50	104	98	70	91	56	50		UI-M-BH0-ain-b-07-0-UI.s1 Mus musculus cDNA, 3' end /clone=UI-M-BH0-ain-b-07-0-UI /clone_end=3' /gb=AI851614 /gi=5495520 /ug=Mm.27282 /len=425 /STRA=for			87.25	77.1667	0.884432	0.739282		0.573066	0.641834
101569_at	50	50	50	76		50	50	50	50	50	50	50	50		Mus musculus mRNA for type II cytokeratin, complete cds /cds=(51,1625) /gb=AB033744 /gi=6092074 /ug=Mm.89769 /len=2193 /STRA=for			56.5	50	0.884956	0.241504		0.884956	0.884956
94097_at	50	50	76	50		50	50	50	50	50	50	50	50		Mus musculus Gli1 mRNA, complete cds /cds=(171,3506) /gb=AB025922 /gi=6009643 /ug=Mm.10081 /len=3686 /STRA=for			56.5	50	0.884956	0.241504		0.884956	0.884956
96275_f_at	50	76	50	50		50	50	50	50	50	50	50	50		UI-M-AQ1-adz-a-05-0-UI.s1 Mus musculus cDNA, 3' end /clone=UI-M-AQ1-adz-a-05-0-UI /clone_end=3' /gb=AI843327 /gi=5477540 /ug=Mm.2986 /len=339 /STRA=for			56.5	50	0.884956	0.241504		0.884956	0.884956
94972_at	482	463	488	515		312	408	361	350	573	582	427	485		Mus musculus mRNA for MSSP, complete cds /cds=(261,1373) /gb=AB026569 /gi=4730905 /ug=Mm.27230 /len=1650 /STRA=for			487	431	0.88501	0.382442		0.995893	0.876797
104098_at	50	82	50	50		50	50	58	50	50	50	50	50		Mus musculus peroxisome membrane protein (PMP22) gene, complete cds /cds=(0,584) /gb=L28835 /gi=454832 /ug=Mm.21853 /len=585 /STRA=for			58	51.3333	0.885057	0.337895		0.862069	0.862069
96712_at	398	521	713	288		316	543	442	458	459	331	330	308		UI-M-AP1-agf-d-04-0-UI.s2 Mus musculus cDNA, 3' end /clone=UI-M-AP1-agf-d-04-0-UI /clone_end=3' /gb=AI848508 /gi=5492414 /ug=Mm.27643 /len=426 /STRA=for			480	424.833	0.885069	0.53163		0.641667	0.6875
92556_at	50	50	50	85		50	59	50	53	50	50	50	75		Hydroxysteroid 17-beta dehydrogenase 1 /cds=(0,971) /gb=D45850 /gi=1321648 /ug=Mm.10208 /len=1178 /STRA=for			58.75	52	0.885106	0.373513		1.2766	0.851064
96076_at	230	264	177	244		105	122	256	279	219	234	274	199		UI-M-BH2.3-aoc-h-05-0-UI.s1 Mus musculus cDNA, 3' end /clone=UI-M-BH2.3-aoc-h-05-0-UI /clone_end=3' /gb=AW121716 /gi=6097049 /ug=Mm.26558 /len=214 /STRA=for			228.75	202.5	0.885246	0.52612		0.869945	1.19781
101740_at	50	95	61	50		67	50	50	73	50	50	51	147		Mus musculus alpha 1A-adrenergic receptor mRNA, complete cds /cds=(0,1400) /gb=AF031431 /gi=2865383 /ug=Mm.57064 /len=1401 /STRA=for			64	56.6667	0.885417	0.483551		2.29688	0.796875
93559_at	585	670	409	575		315	404	592	626	577	460	467	393		Mouse mRNA for APEX nuclease, complete cds /cds=(66,1019) /gb=D90374 /gi=220336 /ug=Mm.203 /len=1185 /STRA=for			559.75	495.667	0.885514	0.423706		0.702099	0.834301
93761_at	82	111	92	50		50	50	104	50	93	98	113	50		Mus musculus heterogenous nuclear ribonucleoprotein U (hnRNP U) mRNA, complete cds /cds=(156,2552) /gb=AF073992 /gi=3329495 /ug=Mm.2115 /len=2600 /STRA=for			83.75	74.1667	0.885572	0.587357		0.597015	1.34925
92199_at	50	71	50	60		50	50	50	50	50	57	50	50		Signal transducer and activator of transcription 5B /cds=(483,2843) /gb=U21110 /gi=747973 /ug=Mm.34064 /len=2940 /STRA=for			57.75	51.1667	0.886003	0.157193		0.865801	0.865801
93853_at	50	50	81	50		50	50	50	57	50	50	50	50		vv48f08.r1 Mus musculus cDNA, 5' end /clone=IMAGE-1225671 /clone_end=5' /gb=AA763918 /gi=2811440 /ug=Mm.87348 /len=809 /STRA=for			57.75	51.1667	0.886003	0.326441		0.865801	0.865801
96178_at	527	500	329	510		303	274	535	522	432	414	449	301		UI-M-BG1-aik-e-04-0-UI.s1 Mus musculus cDNA, 3' end /clone=UI-M-BG1-aik-e-04-0-UI /clone_end=3' /gb=AI850636 /gi=5494542 /ug=Mm.28426 /len=391 /STRA=for			466.5	413.333	0.886031	0.44507		0.64523	0.962487
102211_r_at	50	66	50	74		56	50	55	58	50	50	50	50		Mus musculus unknown protein mRNA, partial cds /cds=(0,98) /gb=U66835 /gi=2970116 /ug=Mm.10102 /len=323 /STRA=for			60	53.1667	0.886111	0.216028		0.833333	0.833333
97876_at	588	895	572	574		278	358	618	630	622	989	716	485		UI-M-AH0-ada-c-09-0-UI.s1 Mus musculus cDNA, 3' end /clone=UI-M-AH0-ada-c-09-0-UI /clone_end=3' /gb=AI842008 /gi=5476221 /ug=Mm.28356 /len=431 /STRA=for			657.25	582.5	0.886269	0.613696		0.737923	1.08939
98077_at	290	706	481	518		290	272	632	399	470	590	496	266		vp15g02.r1 Mus musculus cDNA, 5' end /clone=IMAGE-1068722 /clone_end=5' /gb=AA796831 /gi=2859786 /ug=Mm.34549 /len=424 /STRA=for			498.75	442.167	0.88655	0.594328		0.533333	0.994486
95489_at	171	292	142	133		105	138	215	180	180	164	116	179		UI-M-BH1-aln-f-07-0-UI.s1 Mus musculus cDNA, 3' end /clone=UI-M-BH1-aln-f-07-0-UI /clone_end=3' /gb=AW047953 /gi=5908482 /ug=Mm.25044 /len=331 /STRA=for			184.5	163.667	0.887082	0.567703		0.97019	0.628726
92314_at	75	50	65	58		58	58	50	64	50	50	50	83		Procollagen, type XII, alpha 1 /cds=(83,9286) /gb=U25652 /gi=953236 /ug=Mm.3819 /len=9704 /STRA=rev			62	55	0.887097	0.21227		1.33871	0.806452
99140_at	424	555	273	332		164	164	541	476	388	376	397	158		UI-M-BH2.1-apu-f-09-0-UI.s1 Mus musculus cDNA, 3' end /clone=UI-M-BH2.1-apu-f-09-0-UI /clone_end=3' /gb=AW124920 /gi=6100450 /ug=Mm.41390 /len=426 /STRA=for			396	351.5	0.887626	0.647899		0.39899	1.00253
96130_at	349	554	367	386		100	189	468	367	532	549	293	253		vw13g10.r1 Mus musculus cDNA, 5' end /clone=IMAGE-1243746 /clone_end=5' /gb=AA822531 /gi=2892399 /ug=Mm.28133 /len=426 /STRA=for			414	367.5	0.887681	0.661052		0.611111	0.707729
100488_at	187	292	129	176		101	124	205	213	208	194	215	338		Acid beta glucosidase /cds=(86,1633) /gb=M24119 /gi=193449 /ug=Mm.5031 /len=1684 /STRA=for			196	174.167	0.888605	0.569745		1.72449	1.09694
104643_at	184	231	346	254		350	146	148	116	286	307	131	166		UI-M-BH0-ajt-b-11-0-UI.s1 Mus musculus cDNA, 3' end /clone=UI-M-BH0-ajt-b-11-0-UI /clone_end=3' /gb=AI850846 /gi=5494752 /ug=Mm.31267 /len=341 /STRA=for			253.75	225.5	0.88867	0.637791		0.654187	0.516256
99198_at	59	50	50	66		50	50	50	50	50	50	50	50		Mus musculus ribosomal protein L32-3A (3A) gene, complete cds /cds=(830,1237) /gb=K02060 /gi=3228365 /ug=Mm.42062 /len=1285 /STRA=for			56.25	50	0.888889	0.0760267		0.888889	0.888889
102360_at	50	75	50	50		50	50	50	50	50	50	50	50		uo45a07.x2 Mus musculus cDNA, 3' end /clone=IMAGE-2645460 /clone_end=3' /gb=AW214225 /gi=6520675 /ug=Mm.11636 /len=443 /STRA=rev			56.25	50	0.888889	0.241504		0.888889	0.888889
99622_at	417	317	256	254		176	201	232	218	372	460	173	185		Gut enriched Kruppel-like factor /cds=(310,1761) /gb=U20344 /gi=912487 /ug=Mm.4325 /len=2756 /STRA=for			311	276.5	0.889068	0.610902		0.594855	0.55627
92306_at	67	126	50	65		50	54	115	90	52	50	92	68		Ovary testis transcribed /cds=(0,421) /gb=X96603 /gi=1236768 /ug=Mm.3782 /len=548 /STRA=for			77	68.5	0.88961	0.671587		0.883117	1.19481
101278_at	87	82	78	52		73	61	51	102	50	62	63	108		Mus musculus neurotrophic factor artemin precursor (Artn) mRNA, complete cds /cds=(0,674) /gb=AF109402 /gi=4071354 /ug=Mm.56897 /len=675 /STRA=for			74.75	66.5	0.889632	0.498188		1.44482	0.842809
100632_at	64	79	50	61		50	50	80	59	50	50	50	50		Mus musculus AMP activated protein kinase mRNA, complete cds /cds=(42,1034) /gb=AF036535 /gi=2766684 /ug=Mm.6670 /len=1623 /STRA=for			63.5	56.5	0.889764	0.393435		0.787402	0.787402
93809_at	957	1219	880	1053		662	746	1187	1025	1023	842	780	886		Ancient ubiquitous protein /cds=(60,1292) /gb=U41736 /gi=1517821 /ug=Mm.2146 /len=1499 /STRA=for			1027.25	914.167	0.889916	0.359357		0.862497	0.759309
92432_at	50	53	82	59		50	57	60	59	50	50	59	53		UI-M-AL1-ahp-a-12-0-UI.s1 Mus musculus cDNA, 3' end /clone=UI-M-AL1-ahp-a-12-0-UI /clone_end=3' /gb=AI844359 /gi=5488265 /ug=Mm.41568 /len=449 /STRA=for			61	54.3333	0.89071	0.316444		0.868852	0.967213
94445_at	617	1489	905	703		376	520	1135	1089	965	878	318	638		UI-M-BH2.1-aps-h-07-0-UI.s1 Mus musculus cDNA, 3' end /clone=UI-M-BH2.1-aps-h-07-0-UI /clone_end=3' /gb=AW125273 /gi=6100803 /ug=Mm.28777 /len=414 /STRA=for			928.5	827.167	0.890863	0.660057		0.68713	0.342488
95944_at	198	207	198	184		165	115	206	191	198	177	356	258		AV299153 Mus musculus cDNA, 3' end /clone=5730466C10 /clone_end=3' /gb=AV299153 /gi=6331610 /ug=Mm.24891 /len=273 /STRA=rev			196.75	175.333	0.891148	0.249832		1.31131	1.8094
99485_at	50	75	50	50		50	50	51	50	50	50	50	50		Mus musculus mRNA for ICAD-S, complete cds /cds=(0,797) /gb=AB009376 /gi=2754587 /ug=Mm.41433 /len=798 /STRA=for			56.25	50.1667	0.891852	0.253607		0.888889	0.888889
104311_at	130	217	50	94		50	89	144	165	64	145	95	65		UI-M-BH2.1-aps-e-11-0-UI.s1 Mus musculus cDNA, 3' end /clone=UI-M-BH2.1-aps-e-11-0-UI /clone_end=3' /gb=AW125241 /gi=6100771 /ug=Mm.22397 /len=320 /STRA=for			122.75	109.5	0.892057	0.731139		0.529532	0.773931
92450_at	320	428	292	340		259	269	288	441	359	231	335	275		Solute carrier family 12, member 4 /cds=(0,3257) /gb=AF047339 /gi=3452286 /ug=Mm.4190 /len=3775 /STRA=for			345	307.833	0.892271	0.443876		0.797101	0.971014
97907_at	347	698	491	440		192	290	522	721	505	415	516	313		UI-M-BH1-anf-g-07-0-UI.s1 Mus musculus cDNA, 3' end /clone=UI-M-BH1-anf-g-07-0-UI /clone_end=3' /gb=AW049564 /gi=5910093 /ug=Mm.28470 /len=426 /STRA=for			494	440.833	0.892375	0.64758		0.633603	1.04453
102319_at	192	207	78	96		64	80	133	98	224	168	50	95		Mus musculus SDP8 mRNA, complete cds /cds=(64,561) /gb=AF062484 /gi=3126980 /ug=Mm.10704 /len=617 /STRA=for			143.25	127.833	0.892379	0.711532		0.663176	0.34904
94400_at	97	105	142	161		118	128	93	83	204	50	150	133		UI-M-AK1-aes-c-08-0-UI.s1 Mus musculus cDNA, 3' end /clone=UI-M-AK1-aes-c-08-0-UI /clone_end=3' /gb=AI843094 /gi=5477307 /ug=Mm.25783 /len=349 /STRA=for			126.25	112.667	0.892409	0.656051		1.05347	1.18812
102273_at	78	117	133	94		58	58	115	121	100	113	50	76		Mouse immune suppressor factor TJ6 mRNA, complete cds /cds=(18,2585) /gb=M31226 /gi=198460 /ug=Mm.1158 /len=2936 /STRA=for			105.5	94.1667	0.892575	0.537248		0.720379	0.473934
103078_at	50	50	50	74		50	50	50	50	50	50	50	78		vx35c08.r1 Mus musculus cDNA, 5' end /clone=IMAGE-1277198 /clone_end=5' /gb=AA881018 /gi=2990001 /ug=Mm.17165 /len=162 /STRA=for			56	50	0.892857	0.241504		1.39286	0.892857
97456_at	342	320	164	326		229	168	297	255	253	341	189	190		UI-M-AP0-abl-g-11-0-UI.s1 Mus musculus cDNA, 3' end /clone=UI-M-AP0-abl-g-11-0-UI /clone_end=3' /gb=AI838021 /gi=5472234 /ug=Mm.30263 /len=392 /STRA=for			288	257.167	0.89294	0.508643		0.659722	0.65625
94011_at	283	375	342	379		233	325	383	391	227	289	248	270		UI-M-BG0-aht-a-11-0-UI.s1 Mus musculus cDNA, 3' end /clone=UI-M-BG0-aht-a-11-0-UI /clone_end=3' /gb=AI845182 /gi=5489088 /ug=Mm.21819 /len=325 /STRA=for			344.75	308	0.893401	0.38902		0.783176	0.719362
103441_at	203	231	96	77		50	50	137	174	251	152	156	50		ui14a03.r1 Mus musculus cDNA, 5' end /clone=IMAGE-1851244 /clone_end=5' /gb=AI194248 /gi=3745455 /ug=Mm.21431 /len=438 /STRA=for			151.75	135.667	0.894014	0.754269		0.329489	1.02801
94530_at	202	202	342	283		151	203	372	223	274	157	110	226		UI-M-AH0-acv-d-02-0-UI.s1 Mus musculus cDNA, 3' end /clone=UI-M-AH0-acv-d-02-0-UI /clone_end=3' /gb=AI840376 /gi=5474589 /ug=Mm.29041 /len=448 /STRA=for			257.25	230	0.894072	0.60209		0.878523	0.4276
100495_at	210	271	262	185		73	249	275	250	348	50	241	253		Dishevelled 2, dsh homolog (Drosophila) /cds=(221,2431) /gb=U24160 /gi=1401050 /ug=Mm.5114 /len=2953 /STRA=for			232	207.5	0.894397	0.706832		1.09052	1.03879
99982_at	61	118	96	82		50	77	111	112	79	50	93	50		Mus musculus IkB-beta mRNA, complete cds /cds=(73,1152) /gb=U19799 /gi=699496 /ug=Mm.4448 /len=1212 /STRA=for			89.25	79.8333	0.894491	0.593751		0.560224	1.04202
93283_at	406	554	448	567		378	416	597	441	409	409	687	597		vq07f04.r1 Mus musculus cDNA, 5' end /clone=IMAGE-1093567 /clone_end=5' /gb=AA869401 /gi=2964846 /ug=Mm.1786 /len=793 /STRA=for			493.75	441.667	0.894515	0.336227		1.20911	1.39139
100032_at	277	100	220	184		233	173	170	167	174	131	380	130		Trans-acting transcription factor 1 /cds=(0,307) /gb=X60136 /gi=54158 /ug=Mm.4618 /len=454 /STRA=for			195.25	174.667	0.89458	0.559023		0.665813	1.94622
97977_at	88	139	50	74		100	141	63	50	62	55	50	111		vs81a07.r1 Mus musculus cDNA, 5' end /clone=IMAGE-1152660 /clone_end=5' /gb=AA645293 /gi=2571722 /ug=Mm.3116 /len=276 /STRA=for			87.75	78.5	0.894587	0.702594		1.26496	0.569801
96158_at	342	512	322	286		155	156	473	344	420	414	433	214		UI-M-BH2.1-apj-g-12-0-UI.s1 Mus musculus cDNA, 3' end /clone=UI-M-BH2.1-apj-g-12-0-UI /clone_end=3' /gb=AW123477 /gi=6099007 /ug=Mm.28332 /len=423 /STRA=for			365.5	327	0.894665	0.648431		0.585499	1.18468
100498_g_at	50	78	50	50		50	50	50	50	50	56	50	50		Mouse mRNA for syntaxin 3D-2, complete cds /cds=(0,260) /gb=D38375 /gi=924275 /ug=Mm.5122 /len=261 /STRA=for			57	51	0.894737	0.321139		0.877193	0.877193
101720_f_at	64	69	50	83		66	59	50	77	50	55	50	97		Mus musculus anti-DNA antibody Ig kappa chain mRNA, V-J region, hybridoma 84.20, partial cds /cds=(0,249) /gb=U30629 /gi=896188 /ug=Mm.57031 /len=250 /STRA=for			66.5	59.5	0.894737	0.383448		1.45865	0.75188
101967_at	189	128	117	191		111	88	217	225	137	61	130	188		Mouse mRNA for SDF2, complete cds /cds=(28,663) /gb=D50646 /gi=1741869 /ug=Mm.935 /len=1012 /STRA=for			156.25	139.833	0.894933	0.676279		1.2032	0.832
104275_g_at	314	500	385	303		208	343	479	451	261	275	245	235		Mus musculus mutant p53 mRNA, complete cds /cds=(100,1272) /gb=AB021961 /gi=5421849 /ug=Mm.222 /len=1429 /STRA=for			375.5	336.167	0.895251	0.568685		0.625832	0.652463
103240_f_at	50	73	71	65		57	59	52	80	50	50	50	72		Mus musculus ribonuclease 3 precursor (mR-3) gene, complete cds /cds=(0,470) /gb=AF017258 /gi=2407237 /ug=Mm.20370 /len=471 /STRA=for			64.75	58	0.895753	0.371197		1.11197	0.772201
104096_at	190	322	206	223		153	137	179	168	351	277	324	186		Mus musculus mRNA for origin recognition complex subunit 4 /cds=(0,1301) /gb=Y16386 /gi=3288543 /ug=Mm.21834 /len=1302 /STRA=for			235.25	210.833	0.89621	0.632221		0.790648	1.37726
98731_at	50	73	50	50		50	50	50	50	50	50	50	50		M.musculus mRNA for rab5b protein /cds=(50,697) /gb=X84239 /gi=871434 /ug=Mm.12815 /len=711 /STRA=for			55.75	50	0.896861	0.241504		0.896861	0.896861
103552_at	99	105	50	50		50	50	97	78	68	66	82	56		UI-M-BH1-akp-h-12-0-UI.s1 Mus musculus cDNA, 3' end /clone=UI-M-BH1-akp-h-12-0-UI /clone_end=3' /gb=AW046470 /gi=5906999 /ug=Mm.23822 /len=449 /STRA=rev			76	68.1667	0.89693	0.615456		0.736842	1.07895
103853_at	127	233	168	140		50	126	250	242	137	94	159	81		UI-M-AQ1-ady-c-07-0-UI.s1 Mus musculus cDNA, 3' end /clone=UI-M-AQ1-ady-c-07-0-UI /clone_end=3' /gb=AI845664 /gi=5489570 /ug=Mm.21070 /len=184 /STRA=for			167	149.833	0.897206	0.713305		0.48503	0.952096
99926_at	155	82	165	127		234	233	50	55	90	50	142	187		Phosphatidylinositol glycan, class R /cds=(0,2315) /gb=AB001489 /gi=2804245 /ug=Mm.4317 /len=3733 /STRA=for			132.25	118.667	0.89729	0.785743		1.41399	1.07372
97738_r_at	98	120	108	145		122	153	100	59	88	112	68	119		UI-M-BH2.3-aoj-e-01-0-UI.s1 Mus musculus cDNA, 3' end /clone=UI-M-BH2.3-aoj-e-01-0-UI /clone_end=3' /gb=AW121931 /gi=6097377 /ug=Mm.3957 /len=367 /STRA=rev			117.75	105.667	0.897381	0.523569		1.01062	0.577495
93693_at	99	152	85	158		59	88	96	136	159	127	142	75		UI-M-AQ0-aah-h-10-0-UI.s1 Mus musculus cDNA, 3' end /clone=UI-M-AQ0-aah-h-10-0-UI /clone_end=3' /gb=AI835373 /gi=5469586 /ug=Mm.844 /len=285 /STRA=for			123.5	110.833	0.897436	0.606624		0.607287	1.1498
104262_at	106	196	163	159		156	163	91	167	103	160	140	122		Parathyroid hormone-like peptide /cds=(25,552) /gb=M60057 /gi=200565 /ug=Mm.28440 /len=1022 /STRA=rev			156	140	0.897436	0.499821		0.782051	0.897436
97404_at	180	356	182	252		123	242	279	271	177	215	223	205		UI-M-BH1-aly-b-04-0-UI.s1 Mus musculus cDNA, 3' end /clone=UI-M-BH1-aly-b-04-0-UI /clone_end=3' /gb=AW048244 /gi=5908773 /ug=Mm.29901 /len=328 /STRA=for			242.5	217.833	0.898282	0.596124		0.845361	0.919588
97367_at	197	183	117	87		126	151	188	164	50	108	98	124		Mus musculus AKAP121 mRNA, complete cds /cds=(197,2770) /gb=U95146 /gi=2072306 /ug=Mm.2969 /len=2858 /STRA=for			146	131.167	0.898402	0.659178		0.849315	0.671233
97387_at	234	236	208	357		277	50	275	208	385	200	168	180		UI-M-AM1-afu-f-12-0-UI.s1 Mus musculus cDNA, 3' end /clone=UI-M-AM1-afu-f-12-0-UI /clone_end=3' /gb=AI847879 /gi=5491785 /ug=Mm.29793 /len=391 /STRA=rev			258.75	232.5	0.898551	0.686251		0.695652	0.649275
100362_f_at	69	170	50	142		107	116	144	61	58	95	97	73		Mouse germline immunoglobulin V(H)II gene H8 /cds=(0,207) /gb=X02463 /gi=52418 /ug=Mm.88809 /len=208 /STRA=for			107.75	96.8333	0.898685	0.709725		0.677494	0.900232
94048_at	467	1027	749	628		593	393	625	611	850	800	508	553		UI-M-BH2.3-anz-c-06-0-UI.s1 Mus musculus cDNA, 3' end /clone=UI-M-BH2.3-anz-c-06-0-UI /clone_end=3' /gb=AW120683 /gi=6095981 /ug=Mm.21981 /len=420 /STRA=for			717.75	645.333	0.899106	0.579148		0.770463	0.707767
101093_at	682	1103	987	631		774	585	571	664	1005	991	421	320		Procollagen, type IV, alpha 1 /cds=(0,689) /gb=M15832 /gi=192282 /ug=Mm.738 /len=690 /STRA=for			850.75	765	0.899207	0.541934		0.376139	0.494857
100499_at	154	333	190	145		75	83	200	286	213	252	140	120		Mouse mRNA for syntaxin 3A, complete cds /cds=(103,972) /gb=D29797 /gi=924267 /ug=Mm.5122 /len=1073 /STRA=for			205.5	184.833	0.899432	0.723411		0.583942	0.681265
92572_at	79	79	86	111		55	85	86	50	100	103	50	58		vx14h07.y1 Mus musculus cDNA, 5' end /clone=IMAGE-1264477 /clone_end=5' /gb=AI509617 /gi=4408522 /ug=Mm.10331 /len=448 /STRA=rev			88.75	79.8333	0.899531	0.509792		0.653521	0.56338
93251_at	187	196	51	123		52	74	201	142	173	110	61	50		Mus musculus mRNA for NIPSNAP1 protein /cds=(3,857) /gb=AJ001260 /gi=2769255 /ug=Mm.16958 /len=1874 /STRA=for			139.25	125.333	0.90006	0.734204		0.359066	0.438061
100512_at	230	281	153	207		127	117	230	217	280	205	224	72		UI-M-AN0-ack-b-11-0-UI.s1 Mus musculus cDNA, 3' end /clone=UI-M-AN0-ack-b-11-0-UI /clone_end=3' /gb=AI838853 /gi=5473066 /ug=Mm.52067 /len=397 /STRA=for			217.75	196	0.900115	0.585892		0.330654	1.0287
104250_at	240	366	232	190		219	145	284	219	212	309	158	202		UI-M-BH2.2-aom-c-12-0-UI.s1 Mus musculus cDNA, 3' end /clone=UI-M-BH2.2-aom-c-12-0-UI /clone_end=3' /gb=AW121353 /gi=6096686 /ug=Mm.28355 /len=562 /STRA=for			257	231.333	0.90013	0.560076		0.785992	0.614786
104402_at	51	117	50	50		50	50	52	85	63	62	50	50		mi23c07.r1 Mus musculus cDNA, 5' end /clone=IMAGE-464364 /clone_end=5' /gb=AA030469 /gi=1497632 /ug=Mm.2869 /len=342 /STRA=for			67	60.3333	0.900498	0.665439		0.746269	0.746269
92824_at	253	246	227	265		214	213	196	200	244	272	132	216		Mus musculus type 6 nucleoside diphosphate kinase NM23-M6 (Nm23-M6) mRNA, complete cds /cds=(121,690) /gb=AF051942 /gi=3228531 /ug=Mm.12951 /len=1025 /STRA=for			247.75	223.167	0.900774	0.167647		0.871847	0.532795
97005_at	231	182	285	330		347	183	311	144	192	212	261	157		Mus musculus or6 gene /cds=(0,947) /gb=AJ133430 /gi=5869926 /ug=Mm.88847 /len=948 /STRA=for			257	231.5	0.900778	0.608824		0.610895	1.01556
96799_at	50	96	63	50		50	50	54	80	66	50	87	66		vw37d11.r1 Mus musculus cDNA, 5' end /clone=IMAGE-1246005 /clone_end=5' /gb=AA822413 /gi=2892281 /ug=Mm.29170 /len=499 /STRA=for			64.75	58.3333	0.900901	0.562853		1.01931	1.34363
94384_at	1573	1471	1238	1475		1127	804	1414	1681	1390	1366	1171	811		M.musculus gly96 mRNA /cds=UNKNOWN /gb=X67644 /gi=287803 /ug=Mm.25613 /len=1938 /STRA=for			1439.25	1297	0.901164	0.406958		0.563488	0.813618
98522_at	481	878	677	678		489	349	802	799	656	574	382	448		UI-M-AO0-ach-f-03-0-UI.s1 Mus musculus cDNA, 3' end /clone=UI-M-AO0-ach-f-03-0-UI /clone_end=3' /gb=AI839158 /gi=5473371 /ug=Mm.35812 /len=419 /STRA=for			678.5	611.5	0.901253	0.563625		0.66028	0.563007
101982_at	485	786	695	561		403	594	734	609	522	557	533	540		M.musculus VASP gene /cds=(0,1130) /gb=X98475 /gi=1617401 /ug=Mm.9684 /len=1131 /STRA=for			631.75	569.833	0.901992	0.444284		0.854769	0.843688
92787_at	414	758	208	458		219	289	576	414	583	406	489	172		UI-M-AK1-aex-b-07-0-UI.s1 Mus musculus cDNA, 3' end /clone=UI-M-AK1-aex-b-07-0-UI /clone_end=3' /gb=AI845902 /gi=5489808 /ug=Mm.12459 /len=358 /STRA=for			459.5	414.5	0.902067	0.710605		0.37432	1.0642
97963_at	103	50	50	66		50	50	81	73	50	60	74	50		Signal-induced proliferation associated gene 1 /cds=(1198,3279) /gb=D11374 /gi=641938 /ug=Mm.3072 /len=3502 /STRA=rev			67.25	60.6667	0.902107	0.599363		0.743494	1.10037
104663_at	280	222	195	189		186	120	207	223	208	255	358	302		Mouse mRNA for phosphatidylinositol 4-phosphate 5-kinase type I-beta, complete cds /cds=(269,1909) /gb=D86177 /gi=1622709 /ug=Mm.3191 /len=2403 /STRA=for			221.5	199.833	0.902182	0.466828		1.36343	1.61625
98318_at	50	133	50	50		50	50	50	133	50	50	67	50		Tumor necrosis factor (ligand) superfamily, member 7 /cds=(0,587) /gb=Y13637 /gi=2664271 /ug=Mm.42228 /len=588 /STRA=for			70.75	63.8333	0.902238	0.77905		0.706714	0.946996
92241_at	448	627	532	541		568	446	414	480	421	579	692	566		UI-M-AH1-agw-e-03-0-UI.s1 Mus musculus cDNA, 3' end /clone=UI-M-AH1-agw-e-03-0-UI /clone_end=3' /gb=AI849075 /gi=5492981 /ug=Mm.34844 /len=355 /STRA=rev			537	484.667	0.902545	0.298138		1.054	1.28864
94242_at	370	670	293	280		264	289	422	425	411	373	283	206		vx11d11.r1 Mus musculus cDNA, 5' end /clone=IMAGE-1264149 /clone_end=5' /gb=AA881309 /gi=2990619 /ug=Mm.22354 /len=461 /STRA=for			403.25	364	0.902666	0.639176		0.510849	0.701798
94025_at	1728	1506	884	1555		789	1307	1833	1782	1191	780	1566	977		UI-M-BH1-ako-a-09-0-UI.s1 Mus musculus cDNA, 3' end /clone=UI-M-BH1-ako-a-09-0-UI /clone_end=3' /gb=AW045339 /gi=5905868 /ug=Mm.21874 /len=430 /STRA=for			1418.25	1280.33	0.902756	0.631053		0.688877	1.10418
93084_at	2871	3839	2347	2797		1890	1975	3347	3346	2965	2530	2475	2259		Adenine nucleotide translocator 1, skeletal muscle /cds=(86,982) /gb=U27315 /gi=902007 /ug=Mm.16228 /len=1273 /STRA=for			2963.5	2675.5	0.902818	0.506676		0.762274	0.835161
94488_at	238	459	322	351		202	155	339	301	444	415	145	206		UI-M-AP1-agj-h-03-0-UI.s1 Mus musculus cDNA, 3' end /clone=UI-M-AP1-agj-h-03-0-UI /clone_end=3' /gb=AI847041 /gi=5490947 /ug=Mm.28899 /len=318 /STRA=for			342.5	309.333	0.903163	0.64211		0.60146	0.423358
99187_f_at	144	180	109	136		50	114	169	154	175	109	118	152		UI-M-AJ0-aau-e-03-0-UI.s1 Mus musculus cDNA, 3' end /clone=UI-M-AJ0-aau-e-03-0-UI /clone_end=3' /gb=AI835662 /gi=5469875 /ug=Mm.41890 /len=268 /STRA=for			142.25	128.5	0.903339	0.621625		1.06854	0.829525
101180_at	107	50	85	76		50	50	92	67	62	110	119	50		Ataxia telangiectasia gene mutated in human beings /cds=(41,9241) /gb=U43678 /gi=1469393 /ug=Mm.5088 /len=9620 /STRA=for			79.5	71.8333	0.903564	0.633909		0.628931	1.49686
94363_at	180	185	118	105		59	72	186	181	189	110	231	50		UI-M-AH0-adb-c-03-0-UI.s1 Mus musculus cDNA, 3' end /clone=UI-M-AH0-adb-c-03-0-UI /clone_end=3' /gb=AI840815 /gi=5475028 /ug=Mm.25269 /len=363 /STRA=for			147	132.833	0.903628	0.693755		0.340136	1.57143
101042_f_at	127	190	123	110		64	99	164	183	111	125	90	74		Peptidase 4 /cds=(54,1535) /gb=U51014 /gi=1236705 /ug=Mm.69751 /len=1876 /STRA=for			137.5	124.333	0.904242	0.630463		0.538182	0.654545
97807_at	101	169	57	57		50	50	131	101	56	133	57	50		UI-M-AO0-aca-a-04-0-UI.s1 Mus musculus cDNA, 3' end /clone=UI-M-AO0-aca-a-04-0-UI /clone_end=3' /gb=AI838630 /gi=5472843 /ug=Mm.2815 /len=430 /STRA=for			96	86.8333	0.904514	0.761411		0.520833	0.59375
95451_at	493	807	489	507		311	263	797	771	453	521	294	245		vw72a04.r1 Mus musculus cDNA, 5' end /clone=IMAGE-1260462 /clone_end=5' /gb=AA855382 /gi=2942920 /ug=Mm.24641 /len=314 /STRA=for			574	519.333	0.904762	0.686098		0.426829	0.512195
100042_at	87	108	107	87		51	53	121	128	118	57	52	50		UI-M-AL0-abq-d-08-0-UI.s1 Mus musculus cDNA, 3' end /clone=UI-M-AL0-abq-d-08-0-UI /clone_end=3' /gb=AI837921 /gi=5472134 /ug=Mm.44240 /len=244 /STRA=for			97.25	88	0.904884	0.653634		0.514139	0.534704
103819_at	50	50	71	50		50	50	50	50	50	50	50	50		Mus musculus shd mRNA, complete cds /cds=(285,1316) /gb=AB018423 /gi=3738264 /ug=Mm.20908 /len=1529 /STRA=for			55.25	50	0.904977	0.241504		0.904977	0.904977
94113_at	50	71	50	50		50	50	50	50	50	50	50	50		mr27d01.r1 Mus musculus cDNA, 5' end /clone=IMAGE-598657 /clone_end=5' /gb=AA163908 /gi=1739853 /ug=Mm.1065 /len=362 /STRA=for			55.25	50	0.904977	0.241504		0.904977	0.904977
93531_at	467	637	348	472		406	288	453	460	498	507	251	352		UI-M-BH0-ajr-e-09-0-UI.s1 Mus musculus cDNA, 3' end /clone=UI-M-BH0-ajr-e-09-0-UI /clone_end=3' /gb=AI853855 /gi=5497761 /ug=Mm.19834 /len=540 /STRA=for			481	435.333	0.905059	0.485414		0.731809	0.52183
102079_at	112	50	129	50		144	119	50	50	50	50	50	50		Mus musculus Aip1 mRNA, complete cds /cds=(229,366) /gb=AF069744 /gi=4139032 /ug=Mm.42086 /len=534 /STRA=for			85.25	77.1667	0.905181	0.774502		0.58651	0.58651
93023_f_at	1220	678	685	645		654	399	817	938	632	943	620	612		Mouse histone H3 (H3.2-221) gene, complete cds /cds=(21,431) /gb=M32459 /gi=193855 /ug=Mm.14775 /len=595 /STRA=for			807	730.5	0.905204	0.630546		0.758364	0.768278
93806_at	408	1192	604	627		256	278	842	909	781	780	310	454		UI-M-AH1-agv-e-02-0-UI.s1 Mus musculus cDNA, 3' end /clone=UI-M-AH1-agv-e-02-0-UI /clone_end=3' /gb=AI848671 /gi=5492577 /ug=Mm.21446 /len=385 /STRA=for			707.75	641	0.905687	0.747898		0.641469	0.438008
98613_at	178	271	188	115		152	153	136	250	134	197	127	217		UI-M-AL1-aho-h-03-0-UI.s1 Mus musculus cDNA, 3' end /clone=UI-M-AL1-aho-h-03-0-UI /clone_end=3' /gb=AI849876 /gi=5493775 /ug=Mm.38521 /len=416 /STRA=for			188	170.333	0.906028	0.619845		1.15426	0.675532
104566_at	73	105	51	52		50	50	65	81	53	83	50	50		UI-M-BG0-ahu-g-01-0-UI.s1 Mus musculus cDNA, 3' end /clone=UI-M-BG0-ahu-g-01-0-UI /clone_end=3' /gb=AI845009 /gi=5488915 /ug=Mm.23869 /len=213 /STRA=for			70.25	63.6667	0.906287	0.617405		0.711744	0.711744
92794_f_at	515	497	201	317		179	184	529	572	323	293	145	125		Mouse tumor metastatic process-associated protein (NM23) gene mRNA, 3' end /cds=(0,500) /gb=M35970 /gi=200066 /ug=Mm.1260 /len=664 /STRA=for			382.5	346.667	0.906318	0.740664		0.326797	0.379085
95733_at	326	206	83	316		105	197	349	305	182	128	180	79		UI-M-AO0-aby-a-05-0-UI.s1 Mus musculus cDNA, 3' end /clone=UI-M-AO0-aby-a-05-0-UI /clone_end=3' /gb=AI838274 /gi=5472487 /ug=Mm.29744 /len=324 /STRA=for			232.75	211	0.906552	0.753266		0.33942	0.773362
98889_at	50	86	50	50		50	50	71	50	50	50	50	70		ub45f11.s1 Mus musculus cDNA, 3' end /clone=IMAGE-1380717 /clone_end=3' /gb=AI060923 /gi=3336346 /ug=Mm.28540 /len=337 /STRA=for			59	53.5	0.90678	0.528722		1.18644	0.847458
96264_at	373	410	164	183		189	184	358	259	343	204	451	286		UI-M-BH1-amj-b-12-0-UI.s2 Mus musculus cDNA, 3' end /clone=UI-M-BH1-amj-b-12-0-UI /clone_end=3' /gb=AW061235 /gi=6008986 /ug=Mm.29834 /len=477 /STRA=for			282.5	256.167	0.906785	0.691731		1.01239	1.59646
102265_at	50	97	50	50		62	50	50	74	50	50	78	71		Myogenic factor 6 /cds=(25,753) /gb=X59060 /gi=53297 /ug=Mm.11 /len=1258 /STRA=for			61.75	56	0.906883	0.60257		1.1498	1.26316
94071_at	135	182	116	147		50	57	218	162	130	172	117	92		UI-M-AI1-afl-a-09-0-UI.s1 Mus musculus cDNA, 3' end /clone=UI-M-AI1-afl-a-09-0-UI /clone_end=3' /gb=AI847904 /gi=5491810 /ug=Mm.22114 /len=350 /STRA=for			145	131.5	0.906897	0.715657		0.634483	0.806897
102107_at	64	169	50	50		50	50	86	112	89	66	50	50		ms38a08.x1 Mus musculus cDNA, 3' end /clone=IMAGE-613814 /clone_end=3' /gb=AI325544 /gi=4059973 /ug=Mm.42542 /len=530 /STRA=rev			83.25	75.5	0.906907	0.772994		0.600601	0.600601
96617_at	621	920	552	634		392	374	728	690	736	790	607	507		UI-M-AL1-ahq-c-11-0-UI.s1 Mus musculus cDNA, 3' end /clone=UI-M-AL1-ahq-c-11-0-UI /clone_end=3' /gb=AI844737 /gi=5488643 /ug=Mm.27128 /len=178 /STRA=for			681.75	618.333	0.90698	0.594278		0.743674	0.890356
100947_at	141	79	130	85		146	66	101	68	84	127	134	50		UI-M-AI1-afl-a-11-0-UI.s1 Mus musculus cDNA, 3' end /clone=UI-M-AI1-afl-a-11-0-UI /clone_end=3' /gb=AI847906 /gi=5491812 /ug=Mm.640 /len=510 /STRA=for			108.75	98.6667	0.90728	0.638941		0.45977	1.23218
104248_at	454	781	512	655		495	325	606	417	742	684	359	433		up12b09.y1 Mus musculus cDNA, 5' end /clone=IMAGE-2654105 /clone_end=5' /gb=AW227650 /gi=6556946 /ug=Mm.28345 /len=440 /STRA=for			600.5	544.833	0.907299	0.594839		0.721066	0.597835
98464_at	245	236	157	162		141	158	240	247	200	103	120	97		UI-M-BH2.1-aph-b-03-0-UI.s1 Mus musculus cDNA, 3' end /clone=UI-M-BH2.1-aph-b-03-0-UI /clone_end=3' /gb=AW124196 /gi=6099726 /ug=Mm.34812 /len=382 /STRA=rev			200	181.5	0.9075	0.607698		0.485	0.6
96285_at	1863	3698	2538	2389		1890	1773	2763	2521	2727	2603	1518	1679		Mus musculus mRNA for myeloid associated differentiation protein /cds=(187,1077) /gb=AJ001616 /gi=2463264 /ug=Mm.29874 /len=2822 /STRA=for			2622	2379.5	0.907513	0.538907		0.640351	0.578947
98379_r_at	50	170	210	170		62	319	55	197	134	50	168	324		UI-M-BH2.2-aox-f-02-0-UI.s1 Mus musculus cDNA, 3' end /clone=UI-M-BH2.2-aox-f-02-0-UI /clone_end=3' /gb=AW122568 /gi=6098093 /ug=Mm.44885 /len=309 /STRA=rev			150	136.167	0.907778	0.825811		2.16	1.12
103556_at	872	1412	928	656		767	486	1052	1132	848	982	176	737		UI-M-AO0-acc-d-08-0-UI.s1 Mus musculus cDNA, 3' end /clone=UI-M-AO0-acc-d-08-0-UI /clone_end=3' /gb=AI840158 /gi=5474371 /ug=Mm.19081 /len=406 /STRA=for			967	877.833	0.90779	0.621139		0.762151	0.182006
104601_at	243	357	218	218		107	140	130	212	511	311	181	296		Thrombomodulin /cds=(158,1891) /gb=X14432 /gi=54781 /ug=Mm.24096 /len=3636 /STRA=for			259	235.167	0.907979	0.78119		1.14286	0.698842
97540_f_at	1237	1002	1015	1025		701	884	1190	1233	992	828	756	864		Histocompatibility 2, D region locus 1 /cds=(8,1042) /gb=M69069 /gi=199795 /ug=Mm.33263 /len=1379 /STRA=rev			1069.75	971.333	0.908	0.41841		0.807665	0.706707
103683_at	92	117	50	50		50	59	65	76	68	103	108	53		Mus musculus dihydroorotate dehydrogenase mRNA, partial cds /cds=(0,1151) /gb=AF029667 /gi=2587055 /ug=Mm.23894 /len=1767 /STRA=for			77.25	70.1667	0.908306	0.671018		0.686084	1.39806
98624_at	148	294	235	213		148	141	236	182	245	261	186	129		M.musculus seb4 mRNA /cds=(235,948) /gb=X75316 /gi=407467 /ug=Mm.3865 /len=1908 /STRA=for			222.5	202.167	0.908614	0.58432		0.579775	0.835955
97297_at	50	50	50	73		54	50	50	50	50	50	50	77		UI-M-AO0-acd-a-03-0-UI.s1 Mus musculus cDNA, 3' end /clone=UI-M-AO0-acd-a-03-0-UI /clone_end=3' /gb=AI841858 /gi=5476071 /ug=Mm.28040 /len=426 /STRA=for			55.75	50.6667	0.908819	0.303358		1.38117	0.896861
95486_at	388	475	211	349		315	142	363	381	234	505	347	205		vr42h04.s1 Mus musculus cDNA, 5' end /clone=IMAGE-1123351 /clone_end=5' /gb=AA794134 /gi=2857089 /ug=Mm.24997 /len=155 /STRA=for			355.75	323.333	0.908878	0.686455		0.576247	0.975404
92774_at	50	70	50	50		50	50	50	50	50	50	50	50		mm56b11.r1 Mus musculus cDNA, 5' end /clone=IMAGE-532413 /clone_end=5' /gb=AA068153 /gi=1566435 /ug=Mm.12267 /len=257 /STRA=for			55	50	0.909091	0.241504		0.909091	0.909091
93964_s_at	143	74	107	124		106	97	107	104	113	84	166	83		Mus musculus putative RNA helicase RCK mRNA, partial cds /cds=(0,1359) /gb=AF038995 /gi=2745893 /ug=Mm.97095 /len=1360 /STRA=for			112	101.833	0.909226	0.445965		0.741071	1.48214
94078_at	1313	1232	1033	1179		625	965	1395	1547	1040	916	1011	1188		UI-M-BH1-ala-b-12-0-UI.s1 Mus musculus cDNA, 3' end /clone=UI-M-BH1-ala-b-12-0-UI /clone_end=3' /gb=AW046239 /gi=5906768 /ug=Mm.22138 /len=363 /STRA=for			1189.25	1081.33	0.909257	0.560942		0.998949	0.850116
94935_at	97	145	55	82		57	54	120	72	132	82	61	50		UI-M-AK1-aer-h-05-0-UI.s1 Mus musculus cDNA, 3' end /clone=UI-M-AK1-aer-h-05-0-UI /clone_end=3' /gb=AI843739 /gi=5477952 /ug=Mm.26802 /len=364 /STRA=rev			94.75	86.1667	0.909411	0.711391		0.527704	0.643799
98245_at	94	118	112	167		96	101	119	105	102	147	179	108		C77789 Mus musculus cDNA, 3' end /clone=J0037F03 /clone_end=3' /gb=C77789 /gi=2518119 /ug=Mm.91361 /len=623 /STRA=rev			122.75	111.667	0.909708	0.499797		0.879837	1.45825
100094_at	316	569	347	415		208	285	498	485	351	422	315	280		Mus musculus chromatin structural protein homolog Supt5hp (Supt5h) mRNA, complete cds /cds=(61,3309) /gb=U88539 /gi=2754751 /ug=Mm.460 /len=3538 /STRA=for			411.75	374.833	0.910342	0.629625		0.680024	0.765027
101007_at	154	277	242	204		113	70	283	259	177	296	172	193		UI-M-AQ1-aeb-b-04-0-UI.s1 Mus musculus cDNA, 3' end /clone=UI-M-AQ1-aeb-b-04-0-UI /clone_end=3' /gb=AI845732 /gi=5489638 /ug=Mm.6797 /len=184 /STRA=for			219.25	199.667	0.91068	0.718842		0.880274	0.784493
93794_at	296	546	298	447		150	224	494	468	442	391	303	253		UI-M-AN1-afa-h-03-0-UI.s1 Mus musculus cDNA, 3' end /clone=UI-M-AN1-afa-h-03-0-UI /clone_end=3' /gb=AI846393 /gi=5490299 /ug=Mm.21396 /len=193 /STRA=for			396.75	361.5	0.911153	0.695244		0.637681	0.763705
97960_at	50	50	52	77		50	50	50	50	50	63	51	50		UI-M-BH2.2-aql-h-05-0-UI.s1 Mus musculus cDNA, 3' end /clone=UI-M-BH2.2-aql-h-05-0-UI /clone_end=3' /gb=AW125800 /gi=6101330 /ug=Mm.30602 /len=326 /STRA=for			57.25	52.1667	0.911208	0.412394		0.873362	0.89083
100147_at	61	87	50	50		50	50	50	65	74	50	67	61		Aconitase 1 /cds=(74,2743) /gb=X61147 /gi=52735 /ug=Mm.4927 /len=3424 /STRA=for			62	56.5	0.91129	0.546017		0.983871	1.08065
101984_at	858	1493	1159	1041		814	1059	1274	1355	922	798	702	1301		Mus musculus copper transport protein Atox1 (ATOX1) mRNA, complete cds /cds=(38,244) /gb=AF004591 /gi=2209342 /ug=Mm.9703 /len=432 /STRA=for			1137.75	1037	0.911448	0.546699		1.14348	0.617007
102128_f_at	265	299	124	159		117	97	261	309	175	199	177	111		C77227 Mus musculus cDNA, 3' end /clone=J0027G02 /clone_end=3' /gb=C77227 /gi=2517557 /ug=Mm.43511 /len=205 /STRA=rev			211.75	193	0.911452	0.733662		0.524203	0.835891
101045_at	239	414	258	279		122	284	358	305	280	278	141	328		Mus musculus amyloid beta-peptide binding protein (ERAB) mRNA, complete cds /cds=(104,898) /gb=U96116 /gi=2078283 /ug=Mm.6994 /len=1029 /STRA=for			297.5	271.167	0.911485	0.620211		1.10252	0.47395
103511_at	50	103	50	50		50	50	96	50	50	50	50	50		UI-M-AO1-aen-e-07-0-UI.s1 Mus musculus cDNA, 3' end /clone=UI-M-AO1-aen-e-07-0-UI /clone_end=3' /gb=AI843580 /gi=5477833 /ug=Mm.22578 /len=338 /STRA=rev			63.25	57.6667	0.911726	0.704397		0.790514	0.790514
100992_at	121	123	114	99		61	129	143	94	76	122	174	108		Early development regulator /cds=(26,3064) /gb=U63386 /gi=1490545 /ug=Mm.6822 /len=3851 /STRA=for			114.25	104.167	0.911743	0.569772		0.945295	1.52298
103562_f_at	122	50	50	50		50	50	97	64	50	61	50	50		Mouse endogenous retrovirus truncated gag protein, complete cds, clone del env-1 3.1 /cds=(0,731) /gb=M26005 /gi=193099 /ug=Mm.19121 /len=732 /STRA=for			68	62	0.911765	0.733279		0.735294	0.735294
97356_at	212	249	215	322		59	310	300	364	197	135	214	323		UI-M-AJ0-aax-h-05-0-UI.s2 Mus musculus cDNA, 3' end /clone=UI-M-AJ0-aax-h-05-0-UI /clone_end=3' /gb=AI839653 /gi=5473866 /ug=Mm.29633 /len=462 /STRA=for			249.5	227.5	0.911824	0.736314		1.29459	0.857715
93305_f_at	87	181	65	72		52	79	124	138	66	95	50	79		Mus musculus endobrevin mRNA, complete cds /cds=(154,459) /gb=AF053724 /gi=2982367 /ug=Mm.1838 /len=597 /STRA=for			101.25	92.3333	0.911934	0.752475		0.780247	0.493827
102363_r_at	68	118	50	82		50	82	50	132	50	71	128	50		Mus musculus transcription factor junB (junB) gene, 5' region and complete cds /cds=(294,1328) /gb=U20735 /gi=965003 /ug=Mm.1167 /len=1786 /STRA=for			79.5	72.5	0.91195	0.734755		0.628931	1.61006
104645_at	73	112	50	53		50	50	50	57	120	67	111	50		UI-M-BH0-ajq-d-05-0-UI.s1 Mus musculus cDNA, 3' end /clone=UI-M-BH0-ajq-d-05-0-UI /clone_end=3' /gb=AI853712 /gi=5497583 /ug=Mm.31321 /len=496 /STRA=rev			72	65.6667	0.912037	0.733844		0.694444	1.54167
98604_at	259	514	243	243		132	201	398	391	299	302	248	205		Mus musculus NNP-1 var (NNP-1) mRNA, complete cds /cds=(43,1527) /gb=U79774 /gi=2258277 /ug=Mm.38344 /len=1946 /STRA=for			314.75	287.167	0.912364	0.722618		0.651311	0.787927
104315_at	184	548	237	200		145	115	308	344	280	408	158	182		UI-M-AO1-ael-f-02-0-UI.s1 Mus musculus cDNA, 3' end /clone=UI-M-AO1-ael-f-02-0-UI /clone_end=3' /gb=AI846773 /gi=5490679 /ug=Mm.22413 /len=322 /STRA=for			292.25	266.667	0.912461	0.782626		0.622754	0.540633
104678_at	70	99	68	80		50	69	88	87	80	60	60	114		Growth arrest specific 7 /cds=(130,1395) /gb=U19860 /gi=1154621 /ug=Mm.3257 /len=2888 /STRA=for			79.25	72.3333	0.912723	0.493463		1.43849	0.757098
93342_at	139	227	86	111		87	85	193	156	131	119	120	50		UI-M-BH0-aji-b-02-0-UI.s1 Mus musculus cDNA, 3' end /clone=UI-M-BH0-aji-b-02-0-UI /clone_end=3' /gb=AI852665 /gi=5496571 /ug=Mm.18739 /len=503 /STRA=for			140.75	128.5	0.912966	0.713831		0.35524	0.852575
102584_at	61	170	182	131		183	60	91	168	61	182	107	105		Mus musculus mRNA for protein kinase Dyrk1B /cds=(248,2017) /gb=Y18280 /gi=5738713 /ug=Mm.57249 /len=2018 /STRA=for			136	124.167	0.91299	0.7598		0.772059	0.786765
96545_s_at	50	107	50	50		50	50	76	62	50	64	57	50		mp69a04.x1 Mus musculus cDNA, 3' end /clone=IMAGE-574446 /clone_end=3' /gb=AI447510 /gi=4304492 /ug=Mm.28 /len=291 /STRA=for			64.25	58.6667	0.9131	0.667067		0.77821	0.88716
98928_at	329	708	235	305		133	260	490	426	380	471	274	490		UI-M-BH2.1-aoz-b-12-0-UI.s1 Mus musculus cDNA, 3' end /clone=UI-M-BH2.1-aoz-b-12-0-UI /clone_end=3' /gb=AW122820 /gi=6098350 /ug=Mm.28652 /len=302 /STRA=for			394.25	360	0.913126	0.763094		1.24287	0.69499
103475_s_at	50	69	50	50		50	50	50	50	50	50	50	50		Mus musculus arginine-tRNA-protein transferase 1-1p (Ate1) mRNA, alternatively spliced product, complete cds /cds=(131,1681) /gb=AF079096 /gi=3806089 /ug=Mm.21907 /len=2099 /STRA=for			54.75	50	0.913242	0.241504		0.913242	0.913242
104216_at	50	69	50	50		50	50	50	50	50	50	50	50		Mus musculus Ras-binding protein SUR-8 mRNA, complete cds /cds=(0,1748) /gb=AF068921 /gi=3252980 /ug=Mm.27860 /len=1749 /STRA=for			54.75	50	0.913242	0.241504		0.913242	0.913242
95670_at	50	69	50	50		50	50	50	50	50	50	50	68		UI-M-AH0-acw-a-05-0-UI.s1 Mus musculus cDNA, 3' end /clone=UI-M-AH0-acw-a-05-0-UI /clone_end=3' /gb=AI839868 /gi=5474081 /ug=Mm.29580 /len=406 /STRA=for			54.75	50	0.913242	0.241504		1.24201	0.913242
98790_s_at	50	69	50	50		50	50	50	50	50	50	50	50		Myeloid ecotropic viral integration site 1 /cds=(448,1620) /gb=U33629 /gi=1002783 /ug=Mm.4734 /len=3158 /STRA=for			54.75	50	0.913242	0.241504		0.913242	0.913242
102327_at	50	70	50	57		59	50	52	50	50	50	50	50		Amine oxidase, copper containing 3 /cds=(0,2297) /gb=AF078705 /gi=3603354 /ug=Mm.10734 /len=2298 /STRA=for			56.75	51.8333	0.913363	0.27073		0.881057	0.881057
100027_s_at	236	374	266	397		269	259	273	272	355	317	253	350		ul56h05.x1 Mus musculus cDNA, 3' end /clone=IMAGE-2123097 /clone_end=3' /gb=AI881987 /gi=5567139 /ug=Mm.4609 /len=512 /STRA=for			318.25	290.833	0.913852	0.475665		1.09976	0.794973
104023_at	50	141	69	139		96	123	109	50	108	61	52	135		UI-M-BH1-anj-f-12-0-UI.s1 Mus musculus cDNA, 3' end /clone=UI-M-BH1-anj-f-12-0-UI /clone_end=3' /gb=AW060457 /gi=6008208 /ug=Mm.2699 /len=529 /STRA=rev			99.75	91.1667	0.913952	0.728059		1.35338	0.521303
92987_at	81	116	50	71		50	50	76	94	95	71	130	93		Solute carrier family 4 (anion exchanger), member 3 /cds=(186,3869) /gb=M28383 /gi=191735 /ug=Mm.5053 /len=4060 /STRA=for			79.5	72.6667	0.914046	0.659074		1.16981	1.63522
101358_at	79	50	50	50		50	50	50	64	50	50	50	50		Phospholipase C, beta 3 /cds=(64,3768) /gb=U43144 /gi=1150879 /ug=Mm.6888 /len=4171 /STRA=for			57.25	52.3333	0.914119	0.466508		0.873362	0.873362
103508_at	89	173	110	91		83	55	111	85	114	187	63	66		vy16e12.r1 Mus musculus cDNA, 5' end /clone=IMAGE-1295662 /clone_end=5' /gb=AA919750 /gi=3066529 /ug=Mm.22546 /len=253 /STRA=for			115.75	105.833	0.914327	0.730713		0.570194	0.544276
93215_at	72	181	76	72		54	75	111	78	116	116	87	72		Tumor necrosis factor induced protein 1 /cds=(0,950) /gb=AF061346 /gi=3114712 /ug=Mm.57088 /len=951 /STRA=for			100.25	91.6667	0.914381	0.741696		0.718204	0.86783
103354_at	222	281	156	221		82	160	286	265	224	190	255	154		M.musculus mRNA for imogen 44 /cds=(45,1199) /gb=Z46966 /gi=1272668 /ug=Mm.1841 /len=1267 /STRA=for			220	201.167	0.914394	0.673556		0.7	1.15909
96026_at	64	84	50	52		50	69	50	50	74	50	51	52		uc80h10.x1 Mus musculus cDNA, 3' end /clone=IMAGE-1432003 /clone_end=3' /gb=AA987153 /gi=3167916 /ug=Mm.2573 /len=824 /STRA=for			62.5	57.1667	0.914667	0.543944		0.832	0.816
93068_r_at	139	158	158	50		50	156	50	118	171	148	165	187		Mus musculus histone H2a.2-615 (H2a-615), and histone H3.2-615 (H3-615) genes, complete cds /cds=(43,435) /gb=U62674 /gi=1458142 /ug=Mm.15686 /len=515 /STRA=for			126.25	115.5	0.914851	0.760795		1.48119	1.30693
92280_at	262	964	1145	457		810	724	771	480	574	523	158	515		vx16e04.r1 Mus musculus cDNA, 5' end /clone=IMAGE-1264638 /clone_end=5' /gb=AA867778 /gi=2963223 /ug=Mm.3678 /len=512 /STRA=for			707	647	0.915134	0.746038		0.72843	0.223479
95987_at	50	89	61	79		85	98	50	50	50	50	50	50		C80377 Mus musculus cDNA, 3' end /clone=J0080G07 /clone_end=3' /gb=C80377 /gi=2520707 /ug=Mm.25046 /len=570 /STRA=rev			69.75	63.8333	0.915173	0.663921		0.716846	0.716846
104624_at	323	487	210	286		103	127	384	416	342	421	174	193		UI-M-BH0-aki-c-09-0-UI.s1 Mus musculus cDNA, 3' end /clone=UI-M-BH0-aki-c-09-0-UI /clone_end=3' /gb=AI851539 /gi=5495445 /ug=Mm.24260 /len=530 /STRA=for			326.5	298.833	0.915263	0.75966		0.591118	0.532925
96840_at	759	1359	708	754		604	448	931	959	942	1031	467	718		UI-M-BH0-akf-b-01-0-UI.s1 Mus musculus cDNA, 3' end /clone=UI-M-BH0-akf-b-01-0-UI /clone_end=3' /gb=AI851243 /gi=5495149 /ug=Mm.30017 /len=430 /STRA=for			895	819.167	0.91527	0.670074		0.802235	0.521788
93681_at	645	478	500	671		716	630	571	333	470	430	527	751		UI-M-BH2.1-api-d-09-0-UI.s1 Mus musculus cDNA, 3' end /clone=UI-M-BH2.1-api-d-09-0-UI /clone_end=3' /gb=AW123618 /gi=6099148 /ug=Mm.82649 /len=416 /STRA=for			573.5	525	0.915432	0.568445		1.3095	0.918919
99446_at	70	63	50	50		50	50	50	54	66	50	69	50		CD20 antigen /cds=(177,1052) /gb=M62541 /gi=309155 /ug=Mm.4046 /len=1388 /STRA=for			58.25	53.3333	0.915594	0.364474		0.858369	1.18455
96117_r_at	227	641	317	254		185	172	378	382	454	406	155	268		UI-M-AK1-aer-g-09-0-UI.s1 Mus musculus cDNA, 3' end /clone=UI-M-AK1-aer-g-09-0-UI /clone_end=3' /gb=AI843732 /gi=5477945 /ug=Mm.26991 /len=369 /STRA=for			359.75	329.5	0.915914	0.763896		0.744962	0.430855
99700_at	50	108	74	94		63	98	64	81	92	50	105	50		Mus musculus tissue-type vomeronasal neurons putative pheromone receptor V2R1 mRNA, complete cds /cds=(0,2567) /gb=AF053985 /gi=2996013 /ug=Mm.23795 /len=2568 /STRA=for			81.5	74.6667	0.916155	0.633514		0.613497	1.28834
97703_at	50	95	50	56		50	50	63	58	50	74	50	50		mj85e04.x1 Mus musculus cDNA, 3' end /clone=IMAGE-482910 /clone_end=3' /gb=AI427631 /gi=4273557 /ug=Mm.38034 /len=290 /STRA=rev			62.75	57.5	0.916335	0.610344		0.796813	0.796813
93938_at	50	52	84	81		64	50	59	50	50	94	83	50		Zinc transporter 1 /cds=(147,1658) /gb=U17132 /gi=577840 /ug=Mm.9024 /len=1720 /STRA=for			66.75	61.1667	0.916355	0.635325		0.749064	1.24345
97557_at	62	131	64	50		50	50	50	68	144	60	62	64		UI-M-AH0-acx-h-06-0-UI.s1 Mus musculus cDNA, 3' end /clone=UI-M-AH0-acx-h-06-0-UI /clone_end=3' /gb=AI841457 /gi=5475670 /ug=Mm.33875 /len=225 /STRA=for			76.75	70.3333	0.916395	0.793754		0.833876	0.807818
96843_at	243	274	184	169		159	158	195	241	248	195	195	184		Mus musculus eIF4E-like protein 4E-LP mRNA, complete cds /cds=(0,737) /gb=AF068116 /gi=3201957 /ug=Mm.3002 /len=804 /STRA=for			217.5	199.333	0.916475	0.531181		0.845977	0.896552
104025_at	50	175	50	93		50	50	171	73	104	58	54	69		UI-M-BH1-amb-a-12-0-UI.s1 Mus musculus cDNA, 3' end /clone=UI-M-BH1-amb-a-12-0-UI /clone_end=3' /gb=AW047185 /gi=5907714 /ug=Mm.26995 /len=416 /STRA=for			92	84.3333	0.916667	0.824516		0.75	0.586957
100576_at	229	470	322	287		229	314	314	350	316	276	246	293		Mus musculus platelet-activating factor acetylhydrolase isoform Ib gamma subunit (PAF-AH gamma) mRNA, complete cds /cds=(129,827) /gb=U57746 /gi=1373360 /ug=Mm.597 /len=872 /STRA=for			327	299.833	0.916922	0.570247		0.896024	0.752294
95506_at	795	1438	1150	946		568	810	1275	1301	1013	988	323	909		Myosin Ic /cds=(11,3097) /gb=U96723 /gi=2232026 /ug=Mm.25194 /len=3111 /STRA=for			1082.25	992.5	0.917071	0.63122		0.839917	0.298452
95555_at	50	68	50	50		50	50	50	50	50	50	50	50		Mus musculus UNC-119 (Unc-119) mRNA, complete cds /cds=(69,791) /gb=AF030169 /gi=4103939 /ug=Mm.27744 /len=1196 /STRA=for			54.5	50	0.917431	0.241504		0.917431	0.917431
98283_at	50	50	50	68		50	50	50	50	50	50	50	61		M.musculus mRNA for 5'-3' exonuclease /cds=(102,5261) /gb=X91617 /gi=1894790 /ug=Mm.42050 /len=5495 /STRA=for			54.5	50	0.917431	0.241504		1.11927	0.917431
98896_at	222	267	140	195		158	301	227	135	162	151	202	212		UI-M-BH2.1-apb-a-09-0-UI.s1 Mus musculus cDNA, 3' end /clone=UI-M-BH2.1-apb-a-09-0-UI /clone_end=3' /gb=AW122980 /gi=6098510 /ug=Mm.28552 /len=423 /STRA=for			206	189	0.917476	0.670677		1.02913	0.980583
104354_at	50	50	50	137		145	50	50	50	50	50	50	64		Colony stimulating factor 1 receptor /cds=(75,3005) /gb=X06368 /gi=50980 /ug=Mm.22574 /len=3665 /STRA=for			71.75	65.8333	0.917538	0.827114		0.891986	0.696864
99908_at	143	189	123	124		128	166	150	129	126	98	329	149		Mus musculus mRNA for Pax4, complete cds /cds=(206,1255) /gb=AB010557 /gi=2809092 /ug=Mm.8026 /len=1295 /STRA=for			144.75	132.833	0.917674	0.503519		1.02936	2.27288
98586_at	277	797	370	351		211	212	684	480	415	469	262	225		um12f03.x1 Mus musculus cDNA, 3' end /clone=IMAGE-2182877 /clone_end=3' /gb=AW107230 /gi=6078030 /ug=Mm.3797 /len=574 /STRA=for			448.75	411.833	0.917734	0.785025		0.501393	0.583844
97979_at	130	136	73	88		50	50	124	110	133	121	144	50		UI-M-AJ1-agy-a-10-0-UI.s1 Mus musculus cDNA, 3' end /clone=UI-M-AJ1-agy-a-10-0-UI /clone_end=3' /gb=AI849126 /gi=5493032 /ug=Mm.3121 /len=489 /STRA=for			106.75	98	0.918033	0.712341		0.468384	1.34895
95732_at	375	890	361	606		414	285	731	724	512	408	369	346		UI-M-BH1-alk-b-11-0-UI.s1 Mus musculus cDNA, 3' end /clone=UI-M-BH1-alk-b-11-0-UI /clone_end=3' /gb=AW047746 /gi=5908275 /ug=Mm.29743 /len=406 /STRA=for			558	512.333	0.91816	0.74378		0.620072	0.66129
96968_at	50	87	78	50		69	50	50	50	50	96	59	50		Mus musculus mRNA for limitin, complete cds /cds=(160,708) /gb=AB024521 /gi=5821277 /ug=Mm.88804 /len=997 /STRA=for			66.25	60.8333	0.918239	0.669451		0.754717	0.890566
95479_at	54	140	50	50		50	55	92	87	71	50	60	50		M.musculus mRNA for C1D protein /cds=(77,502) /gb=X95591 /gi=1185124 /ug=Mm.2485 /len=1050 /STRA=for			73.5	67.5	0.918367	0.771659		0.680272	0.816327
103056_at	530	694	270	495		144	258	643	593	599	503	295	251		UI-M-AL1-ahn-b-07-0-UI.s1 Mus musculus cDNA, 3' end /clone=UI-M-AL1-ahn-b-07-0-UI /clone_end=3' /gb=AI849721 /gi=5493627 /ug=Mm.1654 /len=352 /STRA=for			497.25	456.667	0.918384	0.755468		0.504776	0.593263
97820_at	354	388	197	302		180	278	342	343	274	293	330	182		Mus musculus galK mRNA for galactokinase, complete cds /cds=(0,1175) /gb=AB027012 /gi=5931607 /ug=Mm.2820 /len=1293 /STRA=for			310.25	285	0.918614	0.589358		0.586624	1.06366
98107_at	750	901	561	563		648	454	709	683	719	611	633	366		UI-M-BH2.1-apm-e-08-0-UI.s1 Mus musculus cDNA, 3' end /clone=UI-M-BH2.1-apm-e-08-0-UI /clone_end=3' /gb=AW123801 /gi=6099331 /ug=Mm.34796 /len=367 /STRA=for			693.75	637.333	0.918679	0.510969		0.527568	0.912432
103248_at	50	105	50	83		79	50	103	50	65	50	50	50		Mus musculus FK506-binding protein 12.6 mRNA, complete cds /cds=(104,430) /gb=AF060872 /gi=3777532 /ug=Mm.20453 /len=944 /STRA=for			72	66.1667	0.918981	0.71264		0.694444	0.694444
103222_at	610	643	392	375		209	253	496	572	672	583	400	579		Mouse Eps8 mRNA sequence, complete cds /cds=(245,2710) /gb=L21671 /gi=309216 /ug=Mm.2012 /len=3550 /STRA=rev			505	464.167	0.919142	0.724081		1.14653	0.792079
97383_at	954	960	1349	690		637	740	1084	907	861	1222	556	698		UI-M-AH1-agv-d-05-0-UI.s1 Mus musculus cDNA, 3' end /clone=UI-M-AH1-agv-d-05-0-UI /clone_end=3' /gb=AI848623 /gi=5492569 /ug=Mm.29762 /len=466 /STRA=rev			988.25	908.5	0.919302	0.618253		0.706299	0.562611
93615_at	157	188	94	85		90	50	121	117	123	222	149	93		Mus musculus transcription factor PBX3b (PBX3b) mRNA, complete cds /cds=(118,1173) /gb=AF020200 /gi=2432016 /ug=Mm.7331 /len=2467 /STRA=for			131	120.5	0.919847	0.772346		0.709924	1.1374
97180_f_at	57	50	85	50		65	69	50	50	50	50	50	50		Mouse germ line gene coding for beta-globin (Y2) /cds=(0,443) /gb=V00726 /gi=50176 /ug=Mm.35830 /len=444 /STRA=for			60.5	55.6667	0.92011	0.562086		0.826446	0.826446
95698_at	717	1078	663	910		614	654	989	1042	642	708	676	836		UI-M-BH0-ais-c-02-0-UI.s1 Mus musculus cDNA, 3' end /clone=UI-M-BH0-ais-c-02-0-UI /clone_end=3' /gb=AI851810 /gi=5495716 /ug=Mm.29683 /len=276 /STRA=for			842	774.833	0.92023	0.598256		0.992874	0.80285
94922_i_at	547	1023	523	636		484	355	747	675	654	852	573	294		vk25c02.r1 Mus musculus cDNA, 5' end /clone=IMAGE-947618 /clone_end=5' /gb=AA543502 /gi=2291979 /ug=Mm.26609 /len=598 /STRA=rev			682.25	627.833	0.920239	0.686487		0.430927	0.839868
95725_at	84	215	82	50		50	50	152	102	103	138	50	50		uj35g09.x1 Mus musculus cDNA, 3' end /clone=IMAGE-1921984 /clone_end=3' /gb=AI314227 /gi=4029494 /ug=Mm.29735 /len=510 /STRA=for			107.75	99.1667	0.92034	0.818747		0.464037	0.464037
99176_at	280	562	252	273		187	192	464	460	305	280	321	307		UI-M-AQ1-adz-g-04-0-UI.s1 Mus musculus cDNA, 3' end /clone=UI-M-AQ1-adz-g-04-0-UI /clone_end=3' /gb=AI843393 /gi=5477606 /ug=Mm.41785 /len=394 /STRA=for			341.75	314.667	0.920751	0.760197		0.898317	0.939283
103451_at	50	73	50	50		50	50	51	50	50	57	50	50		UI-M-AQ0-aaf-e-10-0-UI.s1 Mus musculus cDNA, 3' end /clone=UI-M-AQ0-aaf-e-10-0-UI /clone_end=3' /gb=AI835159 /gi=5469372 /ug=Mm.21613 /len=139 /STRA=for			55.75	51.3333	0.920777	0.381167		0.896861	0.896861
101293_at	50	81	110	79		50	82	50	50	108	102	56	127		M.musculus G6pd-2 gene /cds=(0,1541) /gb=Z84471 /gi=1806125 /ug=Mm.56918 /len=1542 /STRA=for			80	73.6667	0.920833	0.718788		1.5875	0.7
104142_at	101	201	92	112		50	50	171	131	118	179	97	84		vs82e02.x1 Mus musculus cDNA, 3' end /clone=IMAGE-1152794 /clone_end=3' /gb=AI626975 /gi=4663775 /ug=Mm.22136 /len=377 /STRA=for			126.5	116.5	0.920949	0.78242		0.664032	0.766798
104154_at	534	774	500	592		310	521	791	660	541	493	456	376		Mus musculus mutant p53 mRNA, complete cds /cds=(100,1272) /gb=AB021961 /gi=5421849 /ug=Mm.222 /len=1429 /STRA=for			600	552.667	0.921111	0.634899		0.626667	0.76
100342_i_at	3105	3336	2341	2895		2013	1722	3331	3108	3580	2388	1583	2080		Tubulin alpha1 /cds=(0,596) /gb=M28729 /gi=202222 /ug=Mm.88110 /len=786 /STRA=for			2919.25	2690.33	0.921584	0.601666		0.712512	0.542263
101326_at	53	50	50	64		50	50	50	50	50	50	50	77		Mus musculus C57BL/6 immunoglobulin heavy chain V region mRNA, clone CB17H-9, partial cds /cds=(0,288) /gb=U23025 /gi=780652 /ug=Mm.56975 /len=289 /STRA=for			54.25	50	0.921659	0.144692		1.41935	0.921659
101174_at	50	50	67	50		50	50	50	50	50	50	68	58		Oncomodulin /cds=(0,25) /gb=Z48238 /gi=1107739 /ug=Mm.5064 /len=295 /STRA=for			54.25	50	0.921659	0.241504		1.06912	1.25346
92205_at	50	50	67	50		50	50	50	50	50	50	59	50		Mus musculus insulin receptor substrate-2 (Irs2) gene, partial cds /cds=(0,2206) /gb=AF090738 /gi=3661524 /ug=Mm.34143 /len=2207 /STRA=for			54.25	50	0.921659	0.241504		0.921659	1.08756
94144_g_at	50	67	50	50		50	50	50	50	50	50	50	59		Glial fibrillary acidic protein /cds=(0,1256) /gb=X02801 /gi=51065 /ug=Mm.1239 /len=1257 /STRA=for			54.25	50	0.921659	0.241504		1.08756	0.921659
97974_at	50	50	67	50		50	50	50	50	50	50	50	145		Mus musculus friend of GATA-1 (FOG) mRNA, complete cds /cds=(346,3333) /gb=AF006492 /gi=2252813 /ug=Mm.3105 /len=3398 /STRA=for			54.25	50	0.921659	0.241504		2.67281	0.921659
98869_g_at	50	67	50	50		50	50	50	50	50	50	50	59		B-cell leukemia/lymphoma 2 /cds=(1197,1796) /gb=L31532 /gi=468337 /ug=Mm.5155 /len=1897 /STRA=for			54.25	50	0.921659	0.241504		1.08756	0.921659
95084_f_at	117	227	207	175		241	144	94	159	158	208	152	129		UI-M-BG0-ahu-e-03-0-UI.s1 Mus musculus cDNA, 3' end /clone=UI-M-BG0-ahu-e-03-0-UI /clone_end=3' /gb=AI844995 /gi=5488901 /ug=Mm.29256 /len=218 /STRA=for			181.5	167.333	0.921947	0.672946		0.710744	0.837466
92414_at	50	90	50	50		53	58	50	50	71	50	50	50		Mouse mRNA for meltrin alpha, complete cds /cds=(220,2931) /gb=D50411 /gi=1054586 /ug=Mm.41158 /len=6915 /STRA=for			60	55.3333	0.922222	0.616804		0.833333	0.833333
99945_at	50	80	57	50		56	50	50	52	50	70	50	50		CD19 antigen /cds=(0,740) /gb=M28240 /gi=192827 /ug=Mm.4360 /len=741 /STRA=rev			59.25	54.6667	0.922644	0.525643		0.843882	0.843882
93616_g_at	124	199	70	86		77	60	161	80	118	167	91	73		Mus musculus transcription factor PBX3b (PBX3b) mRNA, complete cds /cds=(118,1173) /gb=AF020200 /gi=2432016 /ug=Mm.7331 /len=2467 /STRA=for			119.75	110.5	0.922756	0.783345		0.609603	0.759916
93760_at	745	983	736	618		462	472	961	936	747	688	500	432		UI-M-AO0-acf-f-02-0-UI.s1 Mus musculus cDNA, 3' end /clone=UI-M-AO0-acf-f-02-0-UI /clone_end=3' /gb=AI838759 /gi=5472972 /ug=Mm.21149 /len=460 /STRA=for			770.5	711	0.922777	0.649119		0.560675	0.648929
92194_at	50	147	128	107		120	89	93	96	92	108	76	114		Proprotein convertase subtilisin/kexin type 5 /cds=(0,4646) /gb=D17583 /gi=407344 /ug=Mm.3401 /len=5208 /STRA=for			108	99.6667	0.92284	0.649922		1.05556	0.703704
103672_at	379	357	298	254		150	198	434	451	220	332	315	189		UI-M-BH2.2-aox-f-06-0-UI.s1 Mus musculus cDNA, 3' end /clone=UI-M-BH2.2-aox-f-06-0-UI /clone_end=3' /gb=AW122572 /gi=6098097 /ug=Mm.20805 /len=505 /STRA=for			322	297.5	0.923913	0.730744		0.586957	0.978261
96736_at	689	1307	826	625		696	374	813	824	921	1150	561	613		UI-M-BG1-aig-c-02-0-UI.s1 Mus musculus cDNA, 3' end /clone=UI-M-BG1-aig-c-02-0-UI /clone_end=3' /gb=AI850370 /gi=5494276 /ug=Mm.28900 /len=432 /STRA=rev			861.75	796.333	0.924089	0.724315		0.711343	0.651001
104191_at	114	50	50	50		51	69	50	65	81	50	52	85		ma42e03.y1 Mus musculus cDNA, 5' end /clone=IMAGE-313372 /clone_end=5' /gb=AI322972 /gi=4057401 /ug=Mm.27480 /len=587 /STRA=for			66	61	0.924242	0.734585		1.28788	0.787879
93312_at	325	475	316	266		193	181	386	399	341	416	332	185		UI-M-BH2.1-apw-b-04-0-UI.s1 Mus musculus cDNA, 3' end /clone=UI-M-BH2.1-apw-b-04-0-UI /clone_end=3' /gb=AW124623 /gi=6100153 /ug=Mm.18485 /len=422 /STRA=for			345.5	319.333	0.924264	0.695975		0.535456	0.960926
103885_at	163	272	121	171		67	105	294	251	160	131	132	99		UI-M-BH1-amq-d-05-0-UI.s1 Mus musculus cDNA, 3' end /clone=UI-M-BH1-amq-d-05-0-UI /clone_end=3' /gb=AW049156 /gi=5909685 /ug=Mm.21246 /len=351 /STRA=for			181.75	168	0.924347	0.795737		0.544704	0.726272
102151_at	127	284	77	50		50	50	142	112	121	271	50	50		Adrenergic receptor, beta 1 /cds=(0,1400) /gb=L10084 /gi=293278 /ug=Mm.46797 /len=1401 /STRA=for			134.5	124.333	0.924411	0.866532		0.371747	0.371747
96042_at	168	192	119	144		62	106	182	279	87	148	129	99		Mus musculus manganese superoxide dismutase (MnSOD) gene /cds=(70,738) /gb=L35528 /gi=2182263 /ug=Mm.2597 /len=906 /STRA=for			155.75	144	0.924559	0.787324		0.635634	0.82825
92426_at	50	67	50	50		50	50	50	50	51	50	50	52		uc54h09.r1 Mus musculus cDNA, 5' end /clone=IMAGE-1429505 /clone_end=5' /gb=AI877157 /gi=5551206 /ug=Mm.41448 /len=530 /STRA=for			54.25	50.1667	0.924731	0.259737		0.958525	0.921659
97514_at	174	166	129	94		50	121	176	185	125	124	83	105		UI-M-BH1-akp-d-11-0-UI.s1 Mus musculus cDNA, 3' end /clone=UI-M-BH1-akp-d-11-0-UI /clone_end=3' /gb=AW046438 /gi=5906967 /ug=Mm.31946 /len=438 /STRA=rev			140.75	130.167	0.924808	0.72133		0.746004	0.589698
103554_at	93	155	85	93		71	50	104	105	158	103	50	50		vu39b11.r1 Mus musculus cDNA, 5' end /clone=IMAGE-1193757 /clone_end=5' /gb=AA726223 /gi=2743930 /ug=Mm.23840 /len=504 /STRA=for			106.5	98.5	0.924883	0.733971		0.469484	0.469484
96187_at	353	380	325	248		260	202	291	280	368	411	309	183		UI-M-AP0-abj-a-11-0-UI.s2 Mus musculus cDNA, 3' end /clone=UI-M-AP0-abj-a-11-0-UI /clone_end=3' /gb=AI837021 /gi=5471234 /ug=Mm.28486 /len=182 /STRA=for			326.5	302	0.924962	0.598448		0.56049	0.946401
104593_at	56	78	67	70		67	50	80	79	50	50	52	50		UI-M-AJ1-ahc-b-12-0-UI.s1 Mus musculus cDNA, 3' end /clone=UI-M-AJ1-ahc-b-12-0-UI /clone_end=3' /gb=AI849396 /gi=5493302 /ug=Mm.24002 /len=304 /STRA=for			67.75	62.6667	0.924969	0.556278		0.738007	0.767528
96872_at	763	1211	1052	1008		871	784	1094	963	926	960	802	1032		UI-M-AI0-aat-b-06-0-UI.s1 Mus musculus cDNA, 3' end /clone=UI-M-AI0-aat-b-06-0-UI /clone_end=3' /gb=AI835846 /gi=5470059 /ug=Mm.30068 /len=182 /STRA=for			1008.5	933	0.925136	0.427723		1.0233	0.79524
96131_at	50	217	155	132		119	229	50	202	119	50	50	182		UI-M-AL0-abt-h-05-0-UI.s1 Mus musculus cDNA, 3' end /clone=UI-M-AL0-abt-h-05-0-UI /clone_end=3' /gb=AI840116 /gi=5474329 /ug=Mm.28140 /len=348 /STRA=for			138.5	128.167	0.925391	0.831299		1.31408	0.361011
94109_at	102	241	99	112		50	50	206	286	77	100	216	50		UI-M-BG1-aid-a-04-0-UI.s1 Mus musculus cDNA, 3' end /clone=UI-M-BG1-aid-a-04-0-UI /clone_end=3' /gb=AI850113 /gi=5494019 /ug=Mm.1033 /len=287 /STRA=for			138.5	128.167	0.925391	0.858761		0.361011	1.55957
95718_f_at	2590	3719	1911	2584		1533	1476	3272	3129	2771	2819	2371	2101		UI-M-BH1-amu-b-10-0-UI.s1 Mus musculus cDNA, 3' end /clone=UI-M-BH1-amu-b-10-0-UI /clone_end=3' /gb=AW060158 /gi=6007924 /ug=Mm.29722 /len=360 /STRA=for			2701	2500	0.925583	0.699297		0.77786	0.877823
98057_at	125	81	87	93		101	94	91	107	66	77	144	123		UI-M-BH2.3-aoh-g-10-0-UI.s1 Mus musculus cDNA, 3' end /clone=UI-M-BH2.3-aoh-g-10-0-UI /clone_end=3' /gb=AW121162 /gi=6096495 /ug=Mm.34356 /len=429 /STRA=for			96.5	89.3333	0.925734	0.533077		1.27461	1.49223
98726_at	50	55	50	61		50	50	50	50	50	50	53	62		Progesterone receptor /cds=(7,2778) /gb=M68915 /gi=200471 /ug=Mm.12798 /len=2794 /STRA=for			54	50	0.925926	0.0889558		1.14815	0.981481
104635_r_at	66	50	50	50		50	50	50	50	50	50	50	50		Gap junction membrane channel protein alpha 7 /cds=(456,1646) /gb=X63100 /gi=50600 /ug=Mm.3096 /len=2074 /STRA=for			54	50	0.925926	0.241504		0.925926	0.925926
92437_at	50	50	50	66		50	50	50	50	50	50	50	50		UI-M-BH1-all-d-07-0-UI.s1 Mus musculus cDNA, 3' end /clone=UI-M-BH1-all-d-07-0-UI /clone_end=3' /gb=AW047445 /gi=5907974 /ug=Mm.41740 /len=423 /STRA=for			54	50	0.925926	0.241504		0.925926	0.925926
101177_at	55	50	50	107		81	83	50	50	50	50	83	95		M.musculus (NIH Swiss) mRNA for activin type IB receptor /cds=(9,1526) /gb=Z31663 /gi=840812 /ug=Mm.5070 /len=2160 /STRA=for			65.5	60.6667	0.926209	0.736023		1.45038	1.26718
102103_f_at	1103	1415	902	1026		763	657	1161	1270	1163	1166	956	864		vg40d04.x1 Mus musculus cDNA, 3' end /clone=IMAGE-863815 /clone_end=3' /gb=AI482454 /gi=4375680 /ug=Mm.42484 /len=454 /STRA=rev			1111.5	1030	0.926676	0.614588		0.777328	0.860099
98965_at	170	157	106	149		71	86	179	210	176	87	84	114		Mouse chromosome 6 BAC-284H12 (Research Genetics mouse BAC library) complete sequence /cds=(1,1323) /gb=AC002397 /gi=3287367 /ug=Mm.3634 /len=1741 /STRA=rev			145.5	134.833	0.92669	0.751581		0.783505	0.57732
99001_at	65	50	50	58		60	50	50	50	50	50	95	50		Mus musculus Zn-15 transcription factor (Zfp-15) mRNA, complete cds /cds=(17,6595) /gb=AF017806 /gi=4102928 /ug=Mm.38193 /len=6706 /STRA=for			55.75	51.6667	0.926756	0.281521		0.896861	1.70404
101370_at	105	241	119	147		69	74	167	137	191	213	117	107		Mus musculus serine-rich RNA polymerase suppressor protein 1 (SRP1) mRNA, complete sequence /cds=UNKNOWN /gb=U20619 /gi=3046878 /ug=Mm.6952 /len=3882 /STRA=for			153	141.833	0.927015	0.782199		0.699346	0.764706
93859_at	93	154	50	92		70	50	142	136	65	78	57	50		uk50c11.x1 Mus musculus cDNA, 3' end /clone=IMAGE-1972436 /clone_end=3' /gb=AI875598 /gi=5549647 /ug=Mm.87729 /len=513 /STRA=rev			97.25	90.1667	0.927164	0.793025		0.514139	0.586118
93488_at	548	949	461	486		189	299	887	874	603	548	422	213		UI-M-AM0-adp-h-12-0-UI.s1 Mus musculus cDNA, 3' end /clone=UI-M-AM0-adp-h-12-0-UI /clone_end=3' /gb=AI840579 /gi=5474792 /ug=Mm.19015 /len=272 /STRA=for			611	566.667	0.927441	0.803331		0.348609	0.690671
101023_f_at	659	777	658	631		495	520	754	870	619	533	501	580		UI-M-AO1-aeh-h-06-0-UI.s1 Mus musculus cDNA, 3' end /clone=UI-M-AO1-aeh-h-06-0-UI /clone_end=3' /gb=AI843605 /gi=5477783 /ug=Mm.6844 /len=379 /STRA=for			681.25	631.833	0.927462	0.558074		0.851376	0.735413
97271_at	340	236	162	195		119	276	277	344	170	112	85	217		UI-M-AQ1-adx-d-04-0-UI.s1 Mus musculus cDNA, 3' end /clone=UI-M-AQ1-adx-d-04-0-UI /clone_end=3' /gb=AI845593 /gi=5489499 /ug=Mm.27922 /len=390 /STRA=for			233.25	216.333	0.927474	0.776954		0.930332	0.364416
103843_at	147	274	152	163		161	129	237	140	202	155	177	154		Guanine nucleotide binding protein, alpha o /cds=(21,1085) /gb=M36777 /gi=193359 /ug=Mm.20964 /len=1910 /STRA=for			184	170.667	0.927536	0.685397		0.836957	0.961957
101015_s_at	53	74	50	50		50	50	50	50	66	50	104	50		Mus musculus type I interferon receptor soluble isoform precursor (IFNAR2) mRNA, complete cds /cds=(202,948) /gb=AF013486 /gi=2408228 /ug=Mm.6834 /len=1045 /STRA=for			56.75	52.6667	0.928047	0.491526		0.881057	1.8326
104035_at	75	50	56	97		50	50	94	50	85	58	94	84		UI-M-BH2.1-apm-e-02-0-UI.s1 Mus musculus cDNA, 3' end /clone=UI-M-BH2.1-apm-e-02-0-UI /clone_end=3' /gb=AW123795 /gi=6099325 /ug=Mm.27057 /len=404 /STRA=rev			69.5	64.5	0.928058	0.713361		1.20863	1.35252
103371_at	757	975	753	667		491	493	976	933	782	713	587	446		Mus musculus major histocompatibility locus class II region; Fas-binding protein Daxx (DAXX) gene, partial cds; Bing1 (BING1), tapasin (tapasin), RalGDS-like factor (RLF), KE2 (KE2), BING4 (BING4), beta1, 3-galactosyl transferase (be /STRA=rev			788	731.333	0.928088	0.645413		0.56599	0.744924
96621_at	228	389	267	227		141	288	287	447	150	234	182	226		UI-M-BH1-amd-a-08-0-UI.s1 Mus musculus cDNA, 3' end /clone=UI-M-BH1-amd-a-08-0-UI /clone_end=3' /gb=AW048608 /gi=5909137 /ug=Mm.27152 /len=300 /STRA=for			277.75	257.833	0.928293	0.766856		0.813681	0.655266
95513_at	114	142	82	82		50	59	133	116	119	108	138	65		UI-M-BH2.1-apq-d-03-0-UI.s1 Mus musculus cDNA, 3' end /clone=UI-M-BH2.1-apq-d-03-0-UI /clone_end=3' /gb=AW124310 /gi=6099840 /ug=Mm.25298 /len=234 /STRA=for			105	97.5	0.928571	0.729526		0.619048	1.31429
98956_at	252	454	84	286		168	170	364	220	343	234	378	182		UI-M-BG0-ahu-c-07-0-UI.s1 Mus musculus cDNA, 3' end /clone=UI-M-BG0-ahu-c-07-0-UI /clone_end=3' /gb=AI844979 /gi=5488885 /ug=Mm.28765 /len=245 /STRA=for			269	249.833	0.928748	0.801997		0.67658	1.4052
95307_at	50	56	76	57		69	53	61	50	50	50	59	56		UI-M-BH1-alk-a-11-0-UI.s1 Mus musculus cDNA, 3' end /clone=UI-M-BH1-alk-a-11-0-UI /clone_end=3' /gb=AW047736 /gi=5908265 /ug=Mm.20160 /len=462 /STRA=rev			59.75	55.5	0.92887	0.498568		0.937238	0.987448
99639_at	395	438	223	439		267	292	457	385	366	316	317	205		Mouse mRNA for ubiquitin carboxyl-terminal hydrolase (UBP), complete cds /cds=(67,2448) /gb=D84096 /gi=1902990 /ug=Mm.4355 /len=3236 /STRA=for			373.75	347.167	0.928874	0.635345		0.548495	0.848161
98920_g_at	153	194	94	98		78	102	138	117	177	139	93	69		vx16d06.r1 Mus musculus cDNA, 5' end /clone=IMAGE-1264619 /clone_end=5' /gb=AA867773 /gi=2963218 /ug=Mm.28626 /len=385 /STRA=for			134.75	125.167	0.928881	0.719378		0.512059	0.690167
96674_at	487	850	446	599		417	296	647	720	530	709	687	327		UI-M-BH2.1-aqb-f-12-0-UI.s1 Mus musculus cDNA, 3' end /clone=UI-M-BH2.1-aqb-f-12-0-UI /clone_end=3' /gb=AW123553 /gi=6099083 /ug=Mm.27404 /len=400 /STRA=for			595.5	553.167	0.928911	0.717602		0.549118	1.15365
100324_g_at	72	174	89	92		71	70	110	74	121	149	99	50		S-adenosylmethionine decarboxylase 3 /cds=(0,1004) /gb=Z23077 /gi=396140 /ug=Mm.87749 /len=1005 /STRA=for			106.75	99.1667	0.928962	0.76574		0.468384	0.9274
101697_f_at	306	376	223	297		212	206	298	439	235	285	338	241		UI-M-AJ1-ahh-d-12-0-UI.s2 Mus musculus cDNA, 3' end /clone=UI-M-AJ1-ahh-d-12-0-UI /clone_end=3' /gb=AI844607 /gi=5488513 /ug=Mm.39586 /len=121 /STRA=rev			300.5	279.167	0.929007	0.685431		0.801997	1.12479
93686_s_at	50	166	50	59		50	51	181	50	55	66	67	50		Mus musculus rho/rac-interacting citron kinase (Crik) mRNA, complete cds /cds=(771,6938) /gb=AF086824 /gi=3599508 /ug=Mm.8321 /len=6954 /STRA=for			81.25	75.5	0.929231	0.872646		0.615385	0.824615
96774_at	313	762	463	301		384	324	532	453	414	457	291	233		UI-M-BH1-alu-c-08-0-UI.s1 Mus musculus cDNA, 3' end /clone=UI-M-BH1-alu-c-08-0-UI /clone_end=3' /gb=AW047139 /gi=5907668 /ug=Mm.29048 /len=363 /STRA=for			459.75	427.333	0.929491	0.734315		0.506797	0.632953
93466_at	96	121	50	83		92	71	106	94	72	53	99	134		Secretory protein SEC8 (S. cerevisiae) /cds=(29,2944) /gb=AF022962 /gi=2547135 /ug=Mm.6925 /len=3155 /STRA=for			87.5	81.3333	0.929524	0.697652		1.53143	1.13143
101338_f_at	50	50	271	50		54	333	50	50	50	50	65	61		Mus musculus TCR beta locus from bases 250554 to 501917 (section 2 of 3) of the complete sequence /cds=(0,740) /gb=AE000664 /gi=2358084 /ug=Mm.57000 /len=741 /STRA=for			105.25	97.8333	0.929533	0.921838		0.579572	0.617577
94465_g_at	50	50	54	74		63	50	50	50	55	50	68	50		Mus musculus chloride channel protein 3 (CLCN3) mRNA, complete cds /cds=(0,2456) /gb=AF029347 /gi=2599549 /ug=Mm.28842 /len=2457 /STRA=for			57	53	0.929825	0.470723		0.877193	1.19298
99374_at	185	83	218	236		308	284	111	115	84	105	214	262		Mouse erythropoietin gene, complete /cds=(0,578) /gb=M12482 /gi=193082 /ug=Mm.56910 /len=579 /STRA=for			180.5	167.833	0.929825	0.832034		1.45152	1.1856
93067_f_at	546	445	341	392		270	380	557	463	312	423	415	149		Mus musculus histone H2a.2-615 (H2a-615), and histone H3.2-615 (H3-615) genes, complete cds /cds=(43,435) /gb=U62674 /gi=1458142 /ug=Mm.15686 /len=515 /STRA=for			431	400.833	0.930008	0.64704		0.345708	0.962877
93839_at	689	991	541	654		401	350	734	720	833	973	538	643		UI-M-BH0-akb-g-05-0-UI.s1 Mus musculus cDNA, 3' end /clone=UI-M-BH0-akb-g-05-0-UI /clone_end=3' /gb=AI854888 /gi=5498794 /ug=Mm.21606 /len=468 /STRA=for			718.75	668.5	0.930087	0.739963		0.894609	0.748522
100024_at	50	65	50	50		50	50	50	50	50	50	50	50		vq44e08.y1 Mus musculus cDNA, 5' end /clone=IMAGE-1097126 /clone_end=5' /gb=AI641895 /gi=4720370 /ug=Mm.46014 /len=413 /STRA=for			53.75	50	0.930233	0.241504		0.930233	0.930233
102206_at	50	50	65	50		50	50	50	50	50	50	50	50		Mus musculus major histocompatibility locus class III region-butyrophilin-like protein gene, partial cds; Notch4, PBX2, RAGE, lysophatidic acid acyl transferase-alpha, palmitoyl-protein thioesterase 2 (PPT2), CREB-RP, and tenascin X /STRA=for			53.75	50	0.930233	0.241504		0.930233	0.930233
101053_at	650	772	436	527		338	323	649	645	723	650	588	403		UI-M-BH1-alz-h-03-0-UI.s1 Mus musculus cDNA, 3' end /clone=UI-M-BH1-alz-h-03-0-UI /clone_end=3' /gb=AW046847 /gi=5907376 /ug=Mm.7039 /len=242 /STRA=for			596.25	554.667	0.930259	0.707393		0.675891	0.986164
96598_at	50	75	50	50		60	50	50	50	50	54	50	50		mr02b11.r1 Mus musculus cDNA, 5' end /clone=IMAGE-596253 /clone_end=5' /gb=AA122714 /gi=1681720 /ug=Mm.309 /len=506 /STRA=for			56.25	52.3333	0.93037	0.485978		0.888889	0.888889
92244_at	86	84	50	53		50	50	92	69	50	70	82	50		Mus musculus mRNA for exonuclease 1 homologue /cds=(16,2529) /gb=AJ238213 /gi=5689873 /ug=Mm.34988 /len=2715 /STRA=for			68.25	63.5	0.930403	0.691621		0.732601	1.20147
101343_at	56	75	110	353		304	104	97	115	94	115	70	116		Mus musculus EWS/FLI1 activated transcript 2 (EAT-2) mRNA, complete cds /cds=(0,398) /gb=AF020263 /gi=2429353 /ug=Mm.57009 /len=399 /STRA=for			148.5	138.167	0.930415	0.884181		0.781145	0.47138
92626_at	335	496	340	331		217	206	435	359	542	338	177	459		M.musculus npdc-1 mRNA for npdcf-1 protein /cds=(8,1006) /gb=X67209 /gi=452275 /ug=Mm.1131 /len=1348 /STRA=for			375.5	349.5	0.930759	0.730704		1.22237	0.471372
100418_at	50	64	50	53		50	50	50	50	53	50	50	50		UI-M-BH2.1-apm-a-04-0-UI.s1 Mus musculus cDNA, 3' end /clone=UI-M-BH2.1-apm-a-04-0-UI /clone_end=3' /gb=AW123750 /gi=6099280 /ug=Mm.46767 /len=403 /STRA=for			54.25	50.5	0.930876	0.202717		0.921659	0.921659
96896_at	933	1428	962	783		544	634	1287	1104	1172	993	682	653		uo40f07.x1 Mus musculus cDNA, 3' end /clone=IMAGE-2645029 /clone_end=3' /gb=AW214159 /gi=6520601 /ug=Mm.30108 /len=217 /STRA=for			1026.5	955.667	0.930995	0.717657		0.636142	0.664394
96206_at	170	217	205	201		178	206	154	140	237	193	145	167		UI-M-BH0-ajj-b-09-0-UI.s1 Mus musculus cDNA, 3' end /clone=UI-M-BH0-ajj-b-09-0-UI /clone_end=3' /gb=AI854506 /gi=5498412 /ug=Mm.28639 /len=413 /STRA=for			198.25	184.667	0.931484	0.509859		0.842371	0.7314
104755_at	146	153	167	137		87	133	148	209	184	82	98	150		Mus musculus mRNA for ABINl, (A20-binding inhibitor of NF-kappa B activation (large) /cds=(116,2059) /gb=AJ242778 /gi=4995752 /ug=Mm.24782 /len=2812 /STRA=rev			150.75	140.5	0.932007	0.708781		0.995025	0.650083
103793_at	127	207	71	110		56	69	143	158	157	137	123	142		ul26a09.x1 Mus musculus cDNA, 3' end /clone=IMAGE-2099416 /clone_end=3' /gb=AI874858 /gi=5548907 /ug=Mm.24972 /len=364 /STRA=for			128.75	120	0.932039	0.793876		1.10291	0.95534
102952_g_at	50	81	50	50		50	50	50	52	71	50	50	50		Mus musculus mRNA for death adaptor molecule (Raidd/Cradd), clone 6-1 /cds=(118,717) /gb=AJ224738 /gi=3929835 /ug=Mm.17493 /len=1649 /STRA=for			57.75	53.8333	0.932179	0.615274		0.865801	0.865801
95660_at	213	370	244	320		154	166	345	336	345	258	306	213		UI-M-BH0-ais-c-07-0-UI.s1 Mus musculus cDNA, 3' end /clone=UI-M-BH0-ais-c-07-0-UI /clone_end=3' /gb=AI851815 /gi=5495721 /ug=Mm.29553 /len=341 /STRA=for			286.75	267.333	0.932287	0.726833		0.742807	1.06713
96741_at	89	102	50	65		50	50	85	99	50	94	66	50		UI-M-BH2.1-apr-d-08-0-UI.s1 Mus musculus cDNA, 3' end /clone=UI-M-BH2.1-apr-d-08-0-UI /clone_end=3' /gb=AW124129 /gi=6099659 /ug=Mm.28932 /len=192 /STRA=rev			76.5	71.3333	0.932462	0.743679		0.653595	0.862745
97803_at	698	1482	1102	810		561	581	1140	1331	873	1238	180	977		Membrane protein, palmitoylated (55 kDa) /cds=(180,1580) /gb=U38196 /gi=1616986 /ug=Mm.2814 /len=1976 /STRA=for			1023	954	0.932551	0.761343		0.955034	0.175953
96355_at	50	68	50	50		50	50	50	55	50	50	50	50		UI-M-AN0-aco-b-06-0-UI.s1 Mus musculus cDNA, 3' end /clone=UI-M-AN0-aco-b-06-0-UI /clone_end=3' /gb=AI839395 /gi=5473608 /ug=Mm.30008 /len=369 /STRA=for			54.5	50.8333	0.932722	0.351565		0.917431	0.917431
97904_at	1405	2531	1507	1197		1226	1116	1742	1724	1661	1821	1153	1139		UI-M-BH2.3-aqc-d-06-0-UI.s1 Mus musculus cDNA, 3' end /clone=UI-M-BH2.3-aqc-d-06-0-UI /clone_end=3' /gb=AW123953 /gi=6099483 /ug=Mm.28464 /len=362 /STRA=for			1660	1548.33	0.932731	0.70069		0.686145	0.694578
103721_at	50	83	50	50		50	50	50	76	50	50	50	50		vo15b01.r1 Mus musculus cDNA, 5' end /clone=IMAGE-1049929 /clone_end=5' /gb=AA592182 /gi=2405845 /ug=Mm.24198 /len=494 /STRA=for			58.25	54.3333	0.932761	0.656405		0.858369	0.858369
93423_at	71	74	89	79		59	72	85	92	67	63	99	100		UI-M-AL1-ahq-f-11-0-UI.s1 Mus musculus cDNA, 3' end /clone=UI-M-AL1-ahq-f-11-0-UI /clone_end=3' /gb=AI844772 /gi=5488678 /ug=Mm.6471 /len=297 /STRA=rev			78.25	73	0.932907	0.492825		1.27796	1.26518
93118_at	334	365	223	232		170	173	325	416	199	332	308	154		UI-M-AL1-ahj-d-09-0-UI.s1 Mus musculus cDNA, 3' end /clone=UI-M-AL1-ahj-d-09-0-UI /clone_end=3' /gb=AI844131 /gi=5488037 /ug=Mm.16767 /len=425 /STRA=for			288.5	269.167	0.932987	0.753678		0.533795	1.06759
101079_at	251	251	152	156		125	123	218	298	157	213	203	126		Mus musculus tip associating protein (Tap) mRNA, complete cds /cds=(105,1961) /gb=AF093140 /gi=3719434 /ug=Mm.7271 /len=2034 /STRA=for			202.5	189	0.933333	0.750095		0.622222	1.00247
100570_at	143	255	189	142		128	52	221	196	196	228	214	182		Mus musculus BS4 peptide mRNA, complete cds /cds=(247,2280) /gb=U27462 /gi=863013 /ug=Mm.5856 /len=3312 /STRA=for			182.25	170.167	0.933699	0.773073		0.998628	1.17421
95433_at	211	215	148	142		124	91	196	242	213	137	185	147		UI-M-BH1-anm-c-12-0-UI.s1 Mus musculus cDNA, 3' end /clone=UI-M-BH1-anm-c-12-0-UI /clone_end=3' /gb=AW049776 /gi=5910305 /ug=Mm.24495 /len=403 /STRA=for			179	167.167	0.933892	0.734271		0.821229	1.03352
97865_g_at	476	607	340	435		332	309	548	531	421	462	404	447		um74d01.y1 Mus musculus cDNA, 5' end /clone=IMAGE-2300929 /clone_end=5' /gb=AW258842 /gi=6631823 /ug=Mm.28327 /len=321 /STRA=for			464.5	433.833	0.933979	0.659348		0.962325	0.869752
92225_f_at	163	207	193	180		172	192	162	186	196	133	200	212		Mus musculus second largest subunit of RNA polymerase I (RPA2) mRNA, complete cds /cds=(55,3462) /gb=U58280 /gi=1621593 /ug=Mm.34589 /len=3978 /STRA=for			185.75	173.5	0.934051	0.411266		1.14132	1.07672
102161_f_at	330	438	272	229		172	317	402	374	296	217	220	282		Mouse MHC (Qa) Q2-k gene for class I antigen, exons 1-3 /cds=(0,1088) /gb=X58609 /gi=53854 /ug=Mm.46812 /len=1089 /STRA=for			317.25	296.333	0.934069	0.726432		0.888889	0.693459
100581_at	1357	2522	2068	1728		1486	1224	1650	2232	1674	2488	1249	2887		Cystatin B /cds=(0,296) /gb=U59807 /gi=1439569 /ug=Mm.6095 /len=297 /STRA=for			1918.75	1792.33	0.934115	0.695771		1.50463	0.650945
99159_at	208	330	163	181		138	50	301	281	224	242	111	50		UI-M-AO1-aeo-b-01-0-UI.s1 Mus musculus cDNA, 3' end /clone=UI-M-AO1-aeo-b-01-0-UI /clone_end=3' /gb=AI842675 /gi=5476888 /ug=Mm.41656 /len=280 /STRA=for			220.5	206	0.93424	0.805404		0.226757	0.503401
94227_at	50	104	60	50		60	50	50	50	78	82	74	50		Mus musculus ultra high sulfur keratin gene, complete cds /cds=(0,560) /gb=M27685 /gi=341749 /ug=Mm.22266 /len=561 /STRA=rev			66	61.6667	0.934343	0.741198		0.757576	1.12121
103859_at	52	52	50	60		50	50	50	50	50	50	50	50		vx08e01.r1 Mus musculus cDNA, 5' end /clone=IMAGE-1263864 /clone_end=5' /gb=AA863768 /gi=2956247 /ug=Mm.21096 /len=234 /STRA=for			53.5	50	0.934579	0.0809405		0.934579	0.934579
101206_at	50	50	50	64		50	50	50	50	50	50	50	50		EST00525 Mus musculus cDNA, 3' end /clone=A0001E02 /clone_end=3' /gb=T25656 /gi=562977 /ug=Mm.5226 /len=198 /STRA=rev			53.5	50	0.934579	0.241504		0.934579	0.934579
102947_at	50	64	50	50		50	50	50	50	50	50	50	50		Mus musculus musculus mRNA for organic cation transporter 2 /cds=(92,1753) /gb=AJ006036 /gi=3650331 /ug=Mm.17322 /len=2164 /STRA=for			53.5	50	0.934579	0.241504		0.934579	0.934579
103264_at	50	64	50	50		50	50	50	50	50	50	50	50		Mus musculus myotubularin related protein 1 (Mtmr1) mRNA, complete cds /cds=(128,2137) /gb=AF073997 /gi=3883001 /ug=Mm.20838 /len=2730 /STRA=for			53.5	50	0.934579	0.241504		0.934579	0.934579
103316_at	50	64	50	50		50	50	50	50	50	50	60	50		vv97g11.x1 Mus musculus cDNA, 3' end /clone=IMAGE-1230404 /clone_end=3' /gb=AI642561 /gi=4721036 /ug=Mm.21302 /len=294 /STRA=for			53.5	50	0.934579	0.241504		0.934579	1.1215
92934_at	64	50	50	50		50	50	50	50	50	50	54	50		Zinc finger protein 90 /cds=UNKNOWN /gb=X79828 /gi=506501 /ug=Mm.4906 /len=2205 /STRA=for			53.5	50	0.934579	0.241504		0.934579	1.00935
97120_at	50	50	50	64		50	50	50	50	50	50	50	50		C77679 Mus musculus cDNA, 3' end /clone=J0035H12 /clone_end=3' /gb=C77679 /gi=2518009 /ug=Mm.33972 /len=599 /STRA=rev			53.5	50	0.934579	0.241504		0.934579	0.934579
97888_at	50	64	50	50		50	50	50	50	50	50	50	50		UI-M-AL1-ahl-e-06-0-UI.s1 Mus musculus cDNA, 3' end /clone=UI-M-AL1-ahl-e-06-0-UI /clone_end=3' /gb=AI849676 /gi=5493582 /ug=Mm.28397 /len=367 /STRA=for			53.5	50	0.934579	0.241504		0.934579	0.934579
102752_at	375	644	455	426		240	309	617	549	497	453	363	242		Mus musculus SHYC (Shyc) mRNA, complete cds /cds=(33,3794) /gb=AF072697 /gi=3293550 /ug=Mm.12912 /len=4112 /STRA=for			475	444.167	0.935088	0.73195		0.509474	0.764211
100151_at	666	963	529	606		346	337	665	725	946	858	782	507		Mus musculus mRNA, complete cds /cds=(69,1250) /gb=L29441 /gi=459889 /ug=Mm.4962 /len=2029 /STRA=for			691	646.167	0.935118	0.773428		0.733719	1.13169
101415_i_at	69	70	53	66		59	72	81	50	50	50	54	50		Mus musculus Bat-4 gene, complete cds /cds=(40,1158) /gb=L76155 /gi=1196643 /ug=Mm.7405 /len=1400 /STRA=for			64.5	60.3333	0.935401	0.592075		0.775194	0.837209
104112_at	224	419	365	224		194	149	392	407	323	264	182	149		UI-M-BH0-ajm-c-10-0-UI.s1 Mus musculus cDNA, 3' end /clone=UI-M-BH0-ajm-c-10-0-UI /clone_end=3' /gb=AI854033 /gi=5497939 /ug=Mm.21936 /len=468 /STRA=for			308	288.167	0.935606	0.772739		0.483766	0.590909
103824_at	70	171	51	55		50	50	50	131	133	73	50	73		Mus musculus transmembrane protein (Wfs1) mRNA, complete cds /cds=(55,2727) /gb=AF084482 /gi=3777584 /ug=Mm.20916 /len=3512 /STRA=for			86.75	81.1667	0.935639	0.859129		0.841499	0.576369
92593_at	50	120	50	50		50	50	64	50	56	109	50	140		Mus musculus osf-2 mRNA for osteoblast specific factor 2, complete cds /cds=(18,2453) /gb=D13664 /gi=393321 /ug=Mm.10681 /len=3187 /STRA=for			67.5	63.1667	0.935802	0.817624		2.07407	0.740741
99515_at	98	258	175	150		141	172	132	158	199	154	182	156		UI-M-BH1-ale-a-06-0-UI.s1 Mus musculus cDNA, 3' end /clone=UI-M-BH1-ale-a-06-0-UI /clone_end=3' /gb=AW046293 /gi=5906822 /ug=Mm.41920 /len=296 /STRA=for			170.25	159.333	0.935879	0.716819		0.9163	1.06902
103571_at	50	75	63	62		50	74	58	50	69	50	55	50		Mus musculus lymphocyte specific transcript (LST) mRNA, complete cds /cds=(14,319) /gb=U72644 /gi=1754657 /ug=Mm.19379 /len=369 /STRA=for			62.5	58.5	0.936	0.571046		0.8	0.88
94944_at	84	57	92	59		60	98	50	50	69	83	50	105		UI-M-BH2.1-apv-g-09-0-UI.s1 Mus musculus cDNA, 3' end /clone=UI-M-BH2.1-apv-g-09-0-UI /clone_end=3' /gb=AW125016 /gi=6100546 /ug=Mm.27030 /len=264 /STRA=for			73	68.3333	0.936073	0.70783		1.43836	0.684932
101901_at	73	127	69	70		50	50	131	145	50	50	50	50		Mus musculus mRNA for Supl15h, complete cds /cds=(6,749) /gb=AB024713 /gi=5103141 /ug=Mm.89579 /len=1249 /STRA=for			84.75	79.3333	0.936087	0.839153		0.589971	0.589971
104110_at	781	941	729	861		611	731	870	795	814	830	809	552		UI-M-BH1-ann-d-07-0-UI.s1 Mus musculus cDNA, 3' end /clone=UI-M-BH1-ann-d-07-0-UI /clone_end=3' /gb=AW060515 /gi=6008266 /ug=Mm.21919 /len=330 /STRA=for			828	775.167	0.936192	0.40277		0.666667	0.977053
95694_at	689	1034	713	720		458	248	1043	988	714	983	812	371		M.musculus TOP gene for topoisomerase I, exons 19-21 /cds=(0,347) /gb=X70956 /gi=57932 /ug=Mm.29663 /len=348 /STRA=for			789	739	0.936629	0.787077		0.470215	1.02915
97516_at	562	618	365	462		350	298	574	559	452	587	563	273		Mus musculus alpha glucosidase II alpha subunit mRNA, complete cds /cds=(11,2911) /gb=U92793 /gi=2104688 /ug=Mm.3196 /len=3859 /STRA=for			501.75	470	0.936721	0.691329		0.544096	1.12207
92443_i_at	65	104	50	50		50	50	93	81	54	50	84	50		Zinc finger protein 1 /cds=(320,1594) /gb=X16493 /gi=55482 /ug=Mm.4184 /len=1939 /STRA=rev			67.25	63	0.936803	0.769186		0.743494	1.24907
93754_at	180	315	179	229		109	194	273	316	219	158	206	246		Mus musculus peroxisomal/mitochondrial dienoyl-CoA isomerase ECH1p (Ech1) mRNA, complete cds /cds=(23,1006) /gb=AF030343 /gi=2606085 /ug=Mm.2112 /len=1138 /STRA=for			225.75	211.5	0.936877	0.764812		1.0897	0.912514
96008_at	965	1391	1040	1029		1234	801	1133	1022	1103	926	962	920		Mus musculus Defender against Apoptotic Death (Dad1) gene /cds=(25,366) /gb=U81052 /gi=1905978 /ug=Mm.2547 /len=406 /STRA=for			1106.25	1036.5	0.936949	0.543462		0.831638	0.869605
97409_at	54	84	51	60		50	50	50	50	92	58	50	50		Mus musculus G-protein-like LRG-47 mRNA, complete cds /cds=(445,1674) /gb=U19119 /gi=633753 /ug=Mm.29938 /len=2227 /STRA=for			62.25	58.3333	0.937082	0.71674		0.803213	0.803213
104079_at	84	116	68	50		58	50	86	85	75	93	95	50		UI-M-BH2.1-apw-g-03-0-UI.s1 Mus musculus cDNA, 3' end /clone=UI-M-BH2.1-apw-g-03-0-UI /clone_end=3' /gb=AW124678 /gi=6100208 /ug=Mm.21735 /len=406 /STRA=for			79.5	74.5	0.937107	0.731892		0.628931	1.19497
100997_at	50	50	51	80		50	71	50	50	50	54	58	86		Desmin /cds=UNKNOWN /gb=L22550 /gi=348971 /ug=Mm.6712 /len=1497 /STRA=for			57.75	54.1667	0.937951	0.635135		1.48918	1.00433
100133_at	80	176	154	133		98	91	99	57	256	163	60	89		Fyn proto-oncogene /cds=(225,1829) /gb=M27266 /gi=193357 /ug=Mm.4848 /len=2299 /STRA=for			135.75	127.333	0.937999	0.838876		0.655617	0.441989
96745_at	70	94	81	116		52	72	88	97	99	100	50	86		vx22c10.r1 Mus musculus cDNA, 5' end /clone=IMAGE-1265202 /clone_end=5' /gb=AA867881 /gi=2963326 /ug=Mm.28953 /len=1125 /STRA=for			90.25	84.6667	0.938135	0.66717		0.952909	0.554017
99655_at	354	667	366	344		176	254	593	539	446	428	363	232		Mus musculus mRNA for sid2895p, complete cds /cds=(98,637) /gb=AB025405 /gi=5931558 /ug=Mm.43760 /len=1113 /STRA=for			432.75	406	0.938186	0.801865		0.536106	0.838821
99194_at	73	166	108	112		63	66	144	151	119	103	77	78		UI-M-BH2.1-aph-h-11-0-UI.s1 Mus musculus cDNA, 3' end /clone=UI-M-BH2.1-aph-h-11-0-UI /clone_end=3' /gb=AW124271 /gi=6099801 /ug=Mm.41935 /len=363 /STRA=for			114.75	107.667	0.938272	0.779633		0.679739	0.671024
94828_at	516	454	390	601		449	270	496	589	421	535	334	247		Opioid receptor, sigma 1 /cds=(61,732) /gb=AF004927 /gi=3493173 /ug=Mm.22745 /len=1618 /STRA=for			490.25	460	0.938297	0.662547		0.503825	0.681285
98490_at	62	103	50	62		50	50	98	50	54	88	74	70		vw37d10.r1 Mus musculus cDNA, 5' end /clone=IMAGE-1246003 /clone_end=5' /gb=AA822412 /gi=2892280 /ug=Mm.35596 /len=460 /STRA=for			69.25	65	0.938628	0.776686		1.01083	1.06859
97951_s_at	345	370	323	337		149	165	411	523	361	327	212	359		Tuberous sclerosis 2 /cds=(34,5259) /gb=U37775 /gi=1181664 /ug=Mm.30435 /len=5351 /STRA=for			343.75	322.667	0.938667	0.78342		1.04436	0.616727
92891_f_at	50	63	50	50		50	50	50	50	50	50	75	50		Homeo box C9 /cds=(348,1130) /gb=X55318 /gi=57878 /ug=Mm.4765 /len=1434 /STRA=for			53.25	50	0.938967	0.241504		0.938967	1.40845
95049_at	1657	2307	1372	1913		935	1361	2441	2496	1534	1448	1713	1133		UI-M-AP0-abk-d-04-0-UI.s1 Mus musculus cDNA, 3' end /clone=UI-M-AP0-abk-d-04-0-UI /clone_end=3' /gb=AI837853 /gi=5472066 /ug=Mm.29135 /len=429 /STRA=for			1812.25	1702.5	0.93944	0.766358		0.62519	0.945234
97539_at	50	109	50	50		50	50	73	50	50	92	50	50		UI-M-BH0-ait-b-02-0-UI.s1 Mus musculus cDNA, 3' end /clone=UI-M-BH0-ait-b-02-0-UI /clone_end=3' /gb=AI854416 /gi=5498322 /ug=Mm.33202 /len=504 /STRA=for			64.75	60.8333	0.939511	0.797837		0.772201	0.772201
102896_at	277	372	178	216		85	175	372	368	262	208	173	180		Downstream of tyrosine kinase 1 /cds=(6,1454) /gb=U78818 /gi=1815655 /ug=Mm.156 /len=1749 /STRA=for			260.75	245	0.939597	0.818731		0.690316	0.663471
99141_at	77	50	50	50		50	70	50	50	50	50	50	116		Mus musculus GM2 activator protein (Gm2a) mRNA, complete cds /cds=(56,637) /gb=U09816 /gi=540017 /ug=Mm.4140 /len=2003 /STRA=for			56.75	53.3333	0.939794	0.627408		2.04405	0.881057
101743_f_at	50	79	50	50		50	64	50	50	50	59	50	53		M.musculus mRNA (1B5) for IgA V-D-J-heavy chain /cds=(0,453) /gb=X94420 /gi=1181227 /ug=Mm.57071 /len=454 /STRA=for			57.25	53.8333	0.94032	0.615182		0.925764	0.873362
95128_at	348	497	274	289		228	209	352	373	386	438	320	334		UI-M-AH1-agr-g-04-0-UI.s1 Mus musculus cDNA, 3' end /clone=UI-M-AH1-agr-g-04-0-UI /clone_end=3' /gb=AI849611 /gi=5493517 /ug=Mm.29412 /len=309 /STRA=for			352	331	0.940341	0.742646		0.948864	0.909091
97274_at	490	573	502	422		330	227	564	460	603	619	326	315		Mus musculus mRNA for 26S proteasome non-ATPase subunit /cds=(236,1165) /gb=Y13071 /gi=2505939 /ug=Mm.27933 /len=1479 /STRA=for			496.75	467.167	0.940446	0.736956		0.634122	0.656266
104714_at	143	189	89	124		88	86	152	123	159	161	101	124		UI-M-BH2.1-apy-c-05-0-UI.s1 Mus musculus cDNA, 3' end /clone=UI-M-BH2.1-apy-c-05-0-UI /clone_end=3' /gb=AW125299 /gi=6100829 /ug=Mm.24477 /len=374 /STRA=for			136.25	128.167	0.940673	0.746748		0.910092	0.741284
100318_at	67	134	50	92		123	141	50	50	70	50	69	138		ml43f10.y1 Mus musculus cDNA, 5' end /clone=IMAGE-514795 /clone_end=5' /gb=AI892206 /gi=5598108 /ug=Mm.87205 /len=493 /STRA=for			85.75	80.6667	0.940719	0.846231		1.60933	0.804665
98507_at	138	305	226	175		245	168	142	126	298	212	139	129		UI-M-AM1-afw-b-05-0-UI.s1 Mus musculus cDNA, 3' end /clone=UI-M-AM1-afw-b-05-0-UI /clone_end=3' /gb=AI834950 /gi=5469163 /ug=Mm.35822 /len=315 /STRA=rev			211	198.5	0.940758	0.783945		0.611374	0.658768
101945_g_at	50	76	50	50		50	50	50	50	50	69	50	50		Mus musculus lysophospholipase I mRNA, complete cds /cds=(0,692) /gb=U89352 /gi=1864158 /ug=Mm.95696 /len=693 /STRA=for			56.5	53.1667	0.941003	0.62122		0.884956	0.884956
95541_at	705	1058	497	592		212	289	957	1078	832	658	642	331		UI-M-BH2.2-aqm-e-08-0-UI.s1 Mus musculus cDNA, 3' end /clone=UI-M-BH2.2-aqm-e-08-0-UI /clone_end=3' /gb=AW125506 /gi=6101036 /ug=Mm.27673 /len=434 /STRA=rev			713	671	0.941094	0.843133		0.464236	0.900421
104625_at	519	528	476	484		434	344	508	422	581	545	450	521		vw87g02.r1 Mus musculus cDNA, 5' end /clone=IMAGE-1261970 /clone_end=5' /gb=AA874130 /gi=2978819 /ug=Mm.24265 /len=204 /STRA=for			501.75	472.333	0.941372	0.541207		1.03837	0.896861
96027_at	294	420	197	265		97	229	423	381	247	284	294	203		UI-M-BH1-ana-e-02-0-UI.s2 Mus musculus cDNA, 3' end /clone=UI-M-BH1-ana-e-02-0-UI /clone_end=3' /gb=AW120546 /gi=6095879 /ug=Mm.25732 /len=473 /STRA=for			294	276.833	0.94161	0.812281		0.690476	1
104694_at	75	91	104	50		66	66	73	114	63	70	50	50		ud79d01.r1 Mus musculus cDNA, 5' end /clone=IMAGE-1477057 /clone_end=5' /gb=AI152353 /gi=3680822 /ug=Mm.3347 /len=386 /STRA=for			80	75.3333	0.941667	0.737713		0.625	0.625
96780_at	65	125	93	68		76	50	146	71	50	103	88	88		uo64d02.x1 Mus musculus cDNA, 3' end /clone=IMAGE-2647299 /clone_end=3' /gb=AW208818 /gi=6514758 /ug=Mm.29063 /len=428 /STRA=for			87.75	82.6667	0.94207	0.820875		1.00285	1.00285
101472_s_at	50	109	50	50		50	51	50	50	115	50	65	110		ui61d08.x1 Mus musculus cDNA, 3' end /clone=IMAGE-1886895 /clone_end=3' /gb=AI195164 /gi=3747770 /ug=Mm.8359 /len=434 /STRA=for			64.75	61	0.942085	0.838766		1.69884	1.00386
101756_f_at	53	190	215	204		262	121	144	103	93	213	97	108		Small proline-rich protein 2K /cds=(0,206) /gb=AJ005569 /gi=3093376 /ug=Mm.57085 /len=207 /STRA=for			165.5	156	0.942598	0.839972		0.652568	0.586103
96869_at	1635	2329	1560	1364		857	1226	2003	1945	1678	2031	1075	2021		UI-M-BH2.1-apk-f-02-0-UI.s1 Mus musculus cDNA, 3' end /clone=UI-M-BH2.1-apk-f-02-0-UI /clone_end=3' /gb=AW124839 /gi=6100369 /ug=Mm.30064 /len=465 /STRA=for			1722	1623.33	0.942702	0.748178		1.17364	0.624274
96607_at	273	454	309	299		294	256	287	346	362	343	221	292		UI-M-BH2.1-apu-d-12-0-UI.s1 Mus musculus cDNA, 3' end /clone=UI-M-BH2.1-apu-d-12-0-UI /clone_end=3' /gb=AW124902 /gi=6100432 /ug=Mm.27065 /len=281 /STRA=for			333.75	314.667	0.942821	0.634455		0.874906	0.662172
104710_at	568	820	666	657		492	528	886	935	439	554	391	364		Bcl2 homologous antagonist/killer /cds=(254,880) /gb=Y13231 /gi=2113878 /ug=Mm.2443 /len=2005 /STRA=for			677.75	639	0.942826	0.748913		0.537071	0.576909
100568_at	773	1080	499	671		472	514	902	852	632	904	825	422		Mus musculus RNAse L inhibitor (Mu-RLI) mRNA, complete cds /cds=(114,1913) /gb=U90446 /gi=3273416 /ug=Mm.5831 /len=3509 /STRA=for			755.75	712.667	0.942993	0.765534		0.558386	1.09163
98415_at	247	415	256	280		154	171	395	296	378	301	229	185		Mus musculus cytokine receptor related protein 4 (Cytor4) mRNA, complete cds /cds=(54,1382) /gb=AF046060 /gi=4105473 /ug=Mm.33962 /len=2365 /STRA=for			299.5	282.5	0.943239	0.784861		0.617696	0.764608
102725_at	50	60	52	50		50	50	50	50	50	50	50	50		Mus musculus K+ channel beta-1 subunit (KVB1) mRNA, complete cds /cds=(759,1964) /gb=AF033003 /gi=2642343 /ug=Mm.1438 /len=2503 /STRA=for			53	50	0.943396	0.149578		0.943396	0.943396
104420_at	50	62	50	50		50	50	50	50	50	50	50	50		Nitric oxide synthase 2, inducible, macrophage /cds=(71,3505) /gb=U43428 /gi=1155342 /ug=Mm.2893 /len=3721 /STRA=for			53	50	0.943396	0.241504		0.943396	0.943396
93021_at	50	62	50	50		50	50	50	50	50	50	50	50		vt80c03.r1 Mus musculus cDNA, 5' end /clone=IMAGE-1177444 /clone_end=5' /gb=AA790008 /gi=2850128 /ug=Mm.14768 /len=322 /STRA=for			53	50	0.943396	0.241504		0.943396	0.943396
95586_at	50	62	50	50		50	50	50	50	50	50	50	50		Mus musculus ATP receptor P2X4 subunit mRNA, complete cds /cds=(31,1197) /gb=AF089751 /gi=4019303 /ug=Mm.27861 /len=1944 /STRA=for			53	50	0.943396	0.241504		0.943396	0.943396
97832_at	50	62	50	50		50	50	50	50	50	50	50	50		vu55b10.r1 Mus musculus cDNA, 5' end /clone=IMAGE-1195291 /clone_end=5' /gb=AA754887 /gi=2802085 /ug=Mm.28222 /len=490 /STRA=rev			53	50	0.943396	0.241504		0.943396	0.943396
98141_at	62	50	50	50		50	50	50	50	50	50	50	50		vn39a07.r1 Mus musculus cDNA, 5' end /clone=IMAGE-1023540 /clone_end=5' /gb=AA647048 /gi=2573477 /ug=Mm.35618 /len=391 /STRA=for			53	50	0.943396	0.241504		0.943396	0.943396
99608_at	50	50	50	62		50	50	50	50	50	50	50	50		Mus musculus thioredoxin-dependent peroxide reductase (tpx) mRNA, complete cds /cds=(79,675) /gb=U20611 /gi=885931 /ug=Mm.42948 /len=907 /STRA=for			53	50	0.943396	0.241504		0.943396	0.943396
103829_at	61	100	50	54		50	52	84	72	58	59	50	67		Mus musculus rjs (rjs) mRNA, complete cds /cds=(119,14629) /gb=AF061529 /gi=3414808 /ug=Mm.20929 /len=15264 /STRA=for			66.25	62.5	0.943396	0.747563		1.01132	0.754717
95715_at	938	1783	1157	1094		614	1007	1588	1556	1022	1249	986	890		UI-M-BH2.2-aqi-g-05-0-UI.s1 Mus musculus cDNA, 3' end /clone=UI-M-BH2.2-aqi-g-05-0-UI /clone_end=3' /gb=AW125739 /gi=6101234 /ug=Mm.29714 /len=321 /STRA=for			1243	1172.67	0.943416	0.776529		0.71601	0.793242
101929_at	825	993	615	471		340	355	902	1093	750	670	323	385		UI-M-AQ0-aag-a-02-0-UI.s2 Mus musculus cDNA, 3' end /clone=UI-M-AQ0-aag-a-02-0-UI /clone_end=3' /gb=AI836322 /gi=5470530 /ug=Mm.939 /len=211 /STRA=for			726	685	0.943526	0.823044		0.530303	0.444904
98910_at	362	288	230	373		344	248	228	356	334	264	334	323		UI-M-AK1-aew-e-07-0-UI.s1 Mus musculus cDNA, 3' end /clone=UI-M-AK1-aew-e-07-0-UI /clone_end=3' /gb=AI846118 /gi=5489989 /ug=Mm.28594 /len=234 /STRA=for			313.25	295.667	0.943868	0.661969		1.03113	1.06624
100134_at	50	50	50	64		50	50	53	50	50	50	50	50		Endoglin /cds=(363,2324) /gb=X77952 /gi=458473 /ug=Mm.4851 /len=2902 /STRA=for			53.5	50.5	0.943925	0.321139		0.934579	0.934579
101940_at	50	98	50	76		50	50	50	96	92	50	50	84		Mus musculus mRNA for neutral sphingomyelinase /cds=(309,1568) /gb=AJ222800 /gi=3021479 /ug=Mm.953 /len=1627 /STRA=for			68.5	64.6667	0.944039	0.802048		1.22628	0.729927
97691_at	50	71	50	50		59	54	50	50	50	50	65	83		MTA.D02.080.A Mus musculus cDNA, 3' end /clone=MTA.D02.080 /clone_end=3' /gb=W91754 /gi=1407923 /ug=Mm.37755 /len=328 /STRA=rev			55.25	52.1667	0.944193	0.518176		1.50226	1.17647
94823_at	5184	5938	4387	4265		3746	4367	5135	5636	4352	4795	4575	4994		UI-M-AQ0-aah-a-06-0-UI.s1 Mus musculus cDNA, 3' end /clone=UI-M-AQ0-aah-a-06-0-UI /clone_end=3' /gb=AI835315 /gi=5469528 /ug=Mm.22723 /len=275 /STRA=for			4943.5	4671.83	0.945046	0.569514		1.01022	0.925458
96878_at	213	182	130	162		86	103	223	188	202	172	180	95		UI-M-BH1-alx-e-09-0-UI.s1 Mus musculus cDNA, 3' end /clone=UI-M-BH1-alx-e-09-0-UI /clone_end=3' /gb=AW048566 /gi=5909095 /ug=Mm.30073 /len=430 /STRA=for			171.75	162.333	0.945172	0.772296		0.55313	1.04803
98015_at	152	419	376	257		263	296	277	401	225	245	303	326		Mus musculus secretory carrier membrane protein (SCAMP3) mRNA, complete cds /cds=(14,1063) /gb=AF005036 /gi=2232236 /ug=Mm.3230 /len=1391 /STRA=for			301	284.5	0.945183	0.780648		1.08306	1.00664
104234_at	150	196	97	107		81	67	185	161	172	114	111	77		UI-M-BH2.1-apz-a-05-0-UI.s1 Mus musculus cDNA, 3' end /clone=UI-M-BH2.1-apz-a-05-0-UI /clone_end=3' /gb=AW125120 /gi=6100650 /ug=Mm.28086 /len=484 /STRA=for			137.5	130	0.945455	0.815278		0.56	0.807273
94515_at	235	149	179	111		70	117	181	161	195	232	92	164		uo62a08.x1 Mus musculus cDNA, 3' end /clone=IMAGE-2647094 /clone_end=3' /gb=AW208628 /gi=6514568 /ug=Mm.28986 /len=601 /STRA=for			168.5	159.333	0.945598	0.805938		0.973294	0.545994
93364_at	509	813	698	499		396	413	644	666	769	686	420	471		Catenin alpha 1 /cds=(72,2792) /gb=X59990 /gi=49934 /ug=Mm.18962 /len=3713 /STRA=for			629.75	595.667	0.945878	0.739815		0.747916	0.666931
93923_at	255	338	133	241		74	140	287	378	210	283	229	50		up31b08.x1 Mus musculus cDNA, 3' end /clone=IMAGE-2655927 /clone_end=3' /gb=AW259620 /gi=6632601 /ug=Mm.89860 /len=176 /STRA=for			241.75	228.667	0.945881	0.84637		0.206825	0.94726
104525_at	101	145	90	108		100	81	89	56	141	163	76	81		UI-M-BH2.1-apk-b-12-0-UI.s1 Mus musculus cDNA, 3' end /clone=UI-M-BH2.1-apk-b-12-0-UI /clone_end=3' /gb=AW124812 /gi=6100342 /ug=Mm.23018 /len=453 /STRA=for			111	105	0.945946	0.795485		0.72973	0.684685
95037_at	212	409	184	245		231	171	233	250	390	215	198	293		UI-M-BH1-ald-d-10-0-UI.s1 Mus musculus cDNA, 3' end /clone=UI-M-BH1-ald-d-10-0-UI /clone_end=3' /gb=AW046639 /gi=5907168 /ug=Mm.27557 /len=338 /STRA=for			262.5	248.333	0.946032	0.803402		1.11619	0.754286
95696_at	770	1281	646	622		412	356	988	1108	856	990	633	461		UI-M-AM0-adm-b-04-0-UI.s1 Mus musculus cDNA, 3' end /clone=UI-M-AM0-adm-b-04-0-UI /clone_end=3' /gb=AI840882 /gi=5475095 /ug=Mm.29675 /len=400 /STRA=for			829.75	785	0.946068	0.831951		0.555589	0.76288
100065_r_at	163	231	50	164		50	54	172	202	224	161	79	50		Mus musculus connexin 43 (alpha-1 gap junction) mRNA, complete cds /cds=(220,1368) /gb=M63801 /gi=191773 /ug=Mm.4504 /len=1408 /STRA=for			152	143.833	0.946272	0.869773		0.328947	0.519737
95770_s_at	50	83	50	50		81	50	50	50	50	50	50	50		Formyl peptide receptor, related sequence 1 /cds=(0,1043) /gb=AF071179 /gi=3549277 /ug=Mm.87768 /len=1044 /STRA=for			58.25	55.1667	0.947067	0.745571		0.858369	0.858369
96346_at	50	123	50	67		50	50	113	93	56	50	50	50		UI-M-BH0-ajm-b-01-0-UI.s1 Mus musculus cDNA, 3' end /clone=UI-M-BH0-ajm-b-01-0-UI /clone_end=3' /gb=AI854020 /gi=5497926 /ug=Mm.29996 /len=262 /STRA=for			72.5	68.6667	0.947126	0.84962		0.689655	0.689655
92645_at	50	53	75	50		50	50	50	50	50	74	50	50		UI-M-BH2.2-aqm-a-07-0-UI.s1 Mus musculus cDNA, 3' end /clone=UI-M-BH2.2-aqm-a-07-0-UI /clone_end=3' /gb=AW125458 /gi=6100988 /ug=Mm.12110 /len=426 /STRA=for			57	54	0.947368	0.675852		0.877193	0.877193
103055_r_at	480	492	572	464		719	758	380	403	258	336	516	617		RNA polymerase II 1 /cds=(0,5798) /gb=M12130 /gi=200793 /ug=Mm.16533 /len=5799 /STRA=rev			502	475.667	0.947543	0.814799		1.22908	1.02789
104579_r_at	407	785	541	361		400	488	592	570	358	569	211	369		ue72f02.r1 Mus musculus cDNA, 5' end /clone=IMAGE-1496667 /clone_end=5' /gb=AI195392 /gi=3747998 /ug=Mm.23961 /len=262 /STRA=for			523.5	496.167	0.947787	0.770165		0.704871	0.403056
100395_at	50	61	50	50		50	50	50	50	50	50	50	50		M.musculus mRNA for gli2 gene /cds=UNKNOWN /gb=X99104 /gi=1707589 /ug=Mm.89929 /len=5849 /STRA=for			52.75	50	0.947867	0.241504		0.947867	0.947867
100933_at	50	50	61	50		50	50	50	50	50	50	50	104		Mus musculus mRNA for HPC-1/syntaxin, complete cds /cds=(9,875) /gb=D45208 /gi=3237185 /ug=Mm.6225 /len=2014 /STRA=for			52.75	50	0.947867	0.241504		1.97156	0.947867
102648_at	50	61	50	50		50	50	50	50	50	50	50	50		Surfactant associated protein D /cds=(5,1129) /gb=L40156 /gi=1129061 /ug=Mm.1321 /len=1253 /STRA=for			52.75	50	0.947867	0.241504		0.947867	0.947867
103679_at	50	50	61	50		50	50	50	50	50	50	50	50		vz45c07.r1 Mus musculus cDNA, 5' end /clone=IMAGE-1329420 /clone_end=5' /gb=AA940503 /gi=3100047 /ug=Mm.23883 /len=440 /STRA=rev			52.75	50	0.947867	0.241504		0.947867	0.947867
104484_at	50	50	61	50		50	50	50	50	50	50	50	50		Mus musculus (10-1) hydroxysteroid sulfotransferase (mSTa2) mRNA, complete cds /cds=(26,883) /gb=L27121 /gi=496151 /ug=Mm.3009 /len=1027 /STRA=for			52.75	50	0.947867	0.241504		0.947867	0.947867
94379_at	50	61	50	50		50	50	50	50	50	50	50	50		Kinesin heavy chain member 1B /cds=(292,3744) /gb=D17577 /gi=407338 /ug=Mm.25569 /len=4862 /STRA=for			52.75	50	0.947867	0.241504		0.947867	0.947867
95350_at	50	50	61	50		50	50	50	50	50	50	66	50		Transthyretin /cds=(26,469) /gb=D00073 /gi=220561 /ug=Mm.2108 /len=680 /STRA=for			52.75	50	0.947867	0.241504		0.947867	1.25118
97108_at	50	50	50	61		50	50	50	50	50	50	50	50		UI-M-BH1-ami-h-11-0-UI.s1 Mus musculus cDNA, 3' end /clone=UI-M-BH1-ami-h-11-0-UI /clone_end=3' /gb=AW049927 /gi=5910456 /ug=Mm.32869 /len=376 /STRA=for			52.75	50	0.947867	0.241504		0.947867	0.947867
96775_at	165	159	57	100		50	50	198	148	101	137	163	81		Chromobox homolog (Drosophila HP1 beta) /cds=(0,557) /gb=X56690 /gi=53162 /ug=Mm.29055 /len=558 /STRA=for			120.25	114	0.948025	0.866837		0.673597	1.35551
99562_at	149	243	128	167		96	116	182	213	172	198	183	176		Mannosidase 2, alpha B1 /cds=(58,3036) /gb=U87240 /gi=1914842 /ug=Mm.4219 /len=3119 /STRA=for			171.75	162.833	0.948083	0.780616		1.02475	1.0655
94382_at	124	171	145	74		50	95	231	150	70	135	72	60		UI-M-BH0-aix-d-03-0-UI.s1 Mus musculus cDNA, 3' end /clone=UI-M-BH0-aix-d-03-0-UI /clone_end=3' /gb=AI851901 /gi=5495807 /ug=Mm.25608 /len=428 /STRA=for			128.5	121.833	0.948119	0.862099		0.466926	0.560311
101057_at	89	198	106	153		81	108	136	144	163	145	140	72		UI-M-BH2.3-aok-a-08-0-UI.s1 Mus musculus cDNA, 3' end /clone=UI-M-BH2.3-aok-a-08-0-UI /clone_end=3' /gb=AW121180 /gi=6096513 /ug=Mm.7066 /len=437 /STRA=for			136.5	129.5	0.948718	0.783678		0.527473	1.02564
104758_at	84	97	78	60		50	50	103	80	71	100	84	50		vx52h06.r1 Mus musculus cDNA, 5' end /clone=IMAGE-1278875 /clone_end=5' /gb=AA895984 /gi=3032377 /ug=Mm.24794 /len=339 /STRA=for			79.75	75.6667	0.948798	0.766994		0.626959	1.05329
104115_at	317	391	294	295		154	149	426	473	379	265	316	175		vx97a11.r1 Mus musculus cDNA, 5' end /clone=IMAGE-1293884 /clone_end=5' /gb=AA867340 /gi=2962785 /ug=Mm.21963 /len=308 /STRA=for			324.25	307.667	0.948856	0.826816		0.539707	0.974557
94431_at	50	50	50	72		50	66	50	50	50	50	50	70		Sialyltransferase 1 /cds=(303,1514) /gb=D16106 /gi=416228 /ug=Mm.26491 /len=2240 /STRA=for			55.5	52.6667	0.948949	0.619046		1.26126	0.900901
97319_at	50	100	50	81		50	75	79	85	50	61	50	50		Mus musculus Ras-like GTP-binding protein Rad mRNA, complete cds /cds=(6,932) /gb=AF084466 /gi=3462897 /ug=Mm.29467 /len=934 /STRA=for			70.25	66.6667	0.948992	0.780445		0.711744	0.711744
100442_at	190	245	178	225		158	198	253	213	189	182	194	151		vs22a03.r1 Mus musculus cDNA, 5' end /clone=IMAGE-1138924 /clone_end=5' /gb=AA656541 /gi=2592695 /ug=Mm.4810 /len=305 /STRA=for			209.5	198.833	0.949085	0.616647		0.720764	0.926014
95607_at	288	274	226	281		240	262	295	270	255	200	219	230		M.musculus es64 mRNA /cds=(176,1516) /gb=X82457 /gi=951299 /ug=Mm.27983 /len=2054 /STRA=for			267.25	253.667	0.949174	0.510796		0.860617	0.819457
97593_f_at	421	748	340	343		173	302	589	591	464	518	227	387		C79694 Mus musculus cDNA, 3' end /clone=J0070F03 /clone_end=3' /gb=C79694 /gi=2520024 /ug=Mm.89577 /len=439 /STRA=rev			463	439.5	0.949244	0.843364		0.835853	0.490281
101679_at	50	50	50	67		50	50	50	50	59	50	50	50		ub73e09.x1 Mus musculus cDNA, 3' end /clone=IMAGE-1383400 /clone_end=3' /gb=AI462500 /gi=4316530 /ug=Mm.32577 /len=620 /STRA=rev			54.25	51.5	0.949309	0.495109		0.921659	0.921659
104218_s_at	50	50	81	50		50	50	57	66	50	56	50	50		vl53f03.x1 Mus musculus cDNA, 3' end /clone=IMAGE-975965 /clone_end=3' /gb=AI507524 /gi=4405375 /ug=Mm.27913 /len=433 /STRA=for			57.75	54.8333	0.949495	0.684846		0.865801	0.865801
102283_at	109	151	50	119		65	100	164	134	98	50	146	78		T-cell lymphoma invasion and metastasis 1 /cds=(506,5281) /gb=U05245 /gi=497638 /ug=Mm.1211 /len=7292 /STRA=for			107.25	101.833	0.949495	0.847588		0.727273	1.36131
99951_at	54	50	65	50		56	56	50	50	50	50	50	50		RAR-related orphan receptor gamma /cds=(0,1550) /gb=AF019660 /gi=2674082 /ug=Mm.4372 /len=1551 /STRA=for			54.75	52	0.949772	0.41756		0.913242	0.913242
98434_at	139	227	101	157		76	61	181	210	186	175	129	50		Mus musculus p85SPR mRNA, complete cds /cds=(97,2037) /gb=U96634 /gi=2098782 /ug=Mm.3439 /len=4172 /STRA=for			156	148.167	0.949786	0.843189		0.320513	0.826923
95886_g_at	105	197	134	115		50	53	212	155	111	204	162	88		mt07e04.r1 Mus musculus cDNA, 5' end /clone=IMAGE-620382 /clone_end=5' /gb=AA177826 /gi=1759088 /ug=Mm.23990 /len=521 /STRA=for			137.75	130.833	0.949788	0.866809		0.638838	1.17604
102768_i_at	118	59	96	80		121	80	91	78	76	57	105	62		Mus musculus mRNA for sterol-C5-desaturase, complete cds /cds=(170,1069) /gb=AB016248 /gi=3721883 /ug=Mm.13081 /len=1721 /STRA=for			88.25	83.8333	0.949953	0.771028		0.70255	1.1898
95706_at	2281	4036	3603	2882		2051	2790	3178	3880	2861	3484	1612	4034		Mouse mRNA for Mac-2 antigen /cds=(43,837) /gb=X16834 /gi=52986 /ug=Mm.2970 /len=955 /STRA=for			3200.5	3040.67	0.95006	0.728737		1.26043	0.503671
98855_r_at	67	91	87	63		56	51	70	81	91	90	50	64		mh18b05.r1 Mus musculus cDNA, 5' end /clone=IMAGE-442833 /clone_end=5' /gb=AA014745 /gi=1475626 /ug=Mm.5096 /len=189 /STRA=for			77	73.1667	0.950216	0.720338		0.831169	0.649351
96518_at	50	118	98	63		50	50	54	50	80	185	50	50		AU017197 Mus musculus cDNA, 3' end /clone=J0735G03 /clone_end=3' /gb=AU017197 /gi=3372310 /ug=Mm.26030 /len=571 /STRA=rev			82.25	78.1667	0.950355	0.895209		0.607903	0.607903
93550_at	194	186	75	162		52	145	260	155	146	122	108	94		Mouse mRNA for double LIM protein-1, complete cds /cds=(6,587) /gb=D88792 /gi=1695701 /ug=Mm.2020 /len=822 /STRA=for			154.25	146.667	0.950837	0.855959		0.6094	0.700162
97296_at	50	61	50	50		50	50	50	51	50	50	54	50		UI-M-BH2.1-apu-f-07-0-UI.s1 Mus musculus cDNA, 3' end /clone=UI-M-BH2.1-apu-f-07-0-UI /clone_end=3' /gb=AW124918 /gi=6100448 /ug=Mm.28039 /len=187 /STRA=for			52.75	50.1667	0.951027	0.270834		0.947867	1.0237
98097_r_at	50	68	50	50		50	50	50	57	54	50	50	50		UI-M-AI0-aal-g-03-0-UI.s2 Mus musculus cDNA, 3' end /clone=UI-M-AI0-aal-g-03-0-UI /clone_end=3' /gb=AI840219 /gi=5474432 /ug=Mm.34708 /len=371 /STRA=for			54.5	51.8333	0.95107	0.510469		0.917431	0.917431
103619_at	405	599	403	468		287	322	629	614	434	389	509	435		UI-M-BG0-aib-g-03-0-UI.s1 Mus musculus cDNA, 3' end /clone=UI-M-BG0-aib-g-03-0-UI /clone_end=3' /gb=AI850017 /gi=5493923 /ug=Mm.20242 /len=428 /STRA=rev			468.75	445.833	0.951111	0.788569		0.928	1.08587
98020_at	468	841	477	656		380	468	700	730	664	542	508	453		Mouse mRNA for novel GTP-binding protein, complete cds /cds=(76,1179) /gb=D10715 /gi=220506 /ug=Mm.3250 /len=1524 /STRA=for			610.5	580.667	0.951133	0.772632		0.742015	0.832105
96641_at	618	511	342	467		326	299	502	487	620	531	309	258		UI-M-BH1-anl-d-04-0-UI.s1 Mus musculus cDNA, 3' end /clone=UI-M-BH1-anl-d-04-0-UI /clone_end=3' /gb=AW060674 /gi=6008425 /ug=Mm.27285 /len=486 /STRA=for			484.5	460.833	0.951152	0.768671		0.532508	0.637771
103861_s_at	291	304	131	209		129	134	282	277	298	214	186	116		vc88g07.r1 Mus musculus cDNA, 5' end /clone=IMAGE-790140 /clone_end=5' /gb=AA388099 /gi=2041044 /ug=Mm.21103 /len=564 /STRA=for			233.75	222.333	0.951159	0.825543		0.496257	0.795722
101184_at	96	195	174	90		196	221	50	114	141	70	153	230		Mus musculus 17-beta-hydroxysteroid dehydrogenase type 3 mRNA, complete cds /cds=(58,975) /gb=U66827 /gi=1513309 /ug=Mm.5109 /len=1138 /STRA=for			138.75	132	0.951351	0.871985		1.65766	1.1027
101772_r_at	78	109	89	101		64	98	71	96	82	127	58	56		Mus musculus CNR7 mRNA for Cadherin-related neural recepter 7, partial cds /cds=(0,2745) /gb=AB008182 /gi=3253086 /ug=Mm.57104 /len=2746 /STRA=for			94.25	89.6667	0.95137	0.728662		0.594164	0.615385
101421_at	154	324	267	222		50	92	331	375	278	254	116	66		Mus musculus major histocompatibility locus class III region-butyrophilin-like protein gene, partial cds; Notch4, PBX2, RAGE, lysophatidic acid acyl transferase-alpha, palmitoyl-protein thioesterase 2 (PPT2), CREB-RP, and tenascin X /STRA=for			241.75	230	0.951396	0.875345		0.273009	0.479835
98921_at	279	357	205	243		243	237	275	209	272	311	300	321		UI-M-BH2.2-aqj-f-12-0-UI.s1 Mus musculus cDNA, 3' end /clone=UI-M-BH2.2-aqj-f-12-0-UI /clone_end=3' /gb=AW125612 /gi=6101142 /ug=Mm.28626 /len=449 /STRA=for			271	257.833	0.951415	0.686251		1.1845	1.10701
92953_at	50	70	50	50		50	50	50	51	63	50	50	50		Formin /cds=(0,194) /gb=U60969 /gi=1480685 /ug=Mm.4938 /len=195 /STRA=for			55	52.3333	0.951515	0.591628		0.909091	0.909091
96535_at	53	112	110	97		65	82	143	128	50	63	61	77		ve31b02.x1 Mus musculus cDNA, 3' end /clone=IMAGE-819723 /clone_end=3' /gb=AI595382 /gi=4604430 /ug=Mm.27577 /len=395 /STRA=rev			93	88.5	0.951613	0.844919		0.827957	0.655914
100759_at	143	192	112	147		120	112	160	172	130	154	136	145		Mus musculus lectin lambda mRNA, complete cds /cds=(104,4543) /gb=U56734 /gi=1336073 /ug=Mm.9020 /len=4588 /STRA=for			148.5	141.333	0.95174	0.699326		0.976431	0.915825
94807_at	526	752	504	612		301	406	727	629	773	583	439	505		UI-M-AH1-ago-h-07-0-UI.s1 Mus musculus cDNA, 3' end /clone=UI-M-AH1-ago-h-07-0-UI /clone_end=3' /gb=AI848354 /gi=5492300 /ug=Mm.22679 /len=221 /STRA=for			598.5	569.833	0.952102	0.78933		0.843776	0.7335
94486_at	2121	2078	1216	1753		1078	1317	2249	2070	1849	1676	980	878		UI-M-BH2.1-apz-g-02-0-UI.s1 Mus musculus cDNA, 3' end /clone=UI-M-BH2.1-apz-g-02-0-UI /clone_end=3' /gb=AW125178 /gi=6100708 /ug=Mm.28892 /len=249 /STRA=for			1792	1706.5	0.952288	0.76881		0.489955	0.546875
93234_at	50	52	58	50		50	50	50	50	50	50	50	50		Mus musculus musculin mRNA, complete cds /cds=(218,823) /gb=AF087035 /gi=3599518 /ug=Mm.5820 /len=1718 /STRA=rev			52.5	50	0.952381	0.13336		0.952381	0.952381
102009_at	50	60	50	50		50	50	50	50	50	50	50	50		UI-M-AQ0-aab-c-12-0-UI.s1 Mus musculus cDNA, 3' end /clone=UI-M-AQ0-aab-c-12-0-UI /clone_end=3' /gb=AI835274 /gi=5469487 /ug=Mm.100115 /len=460 /STRA=rev			52.5	50	0.952381	0.241504		0.952381	0.952381
102170_at	50	50	50	60		50	50	50	50	50	50	50	50		Mus musculus genomic DNA sequence from clone 573K1 on chromosome 17. Contains the gene for gamma-aminobutyric acid (GABA) B receptor 1, five 7 transmembrane receptor (rhodopsin family, olfactory receptor like) protein genes and one p /STRA=for			52.5	50	0.952381	0.241504		0.952381	0.952381
104037_at	50	60	50	50		50	50	50	50	50	50	50	50		UI-M-AN1-afe-d-04-0-UI.s1 Mus musculus cDNA, 3' end /clone=UI-M-AN1-afe-d-04-0-UI /clone_end=3' /gb=AI834891 /gi=5469104 /ug=Mm.21441 /len=466 /STRA=for			52.5	50	0.952381	0.241504		0.952381	0.952381
92412_s_at	50	60	50	50		50	50	50	50	50	50	50	50		M.musculus mRNA for s17 protein /cds=(0,1726) /gb=X81633 /gi=563530 /ug=Mm.4111 /len=2402 /STRA=for			52.5	50	0.952381	0.241504		0.952381	0.952381
93214_at	60	50	50	50		50	50	50	50	50	50	50	50		Mus musculus calcium/calmodulin-dependent protein kinase II delta mRNA, partial cds /cds=(0,523) /gb=AF059029 /gi=3088550 /ug=Mm.57082 /len=524 /STRA=for			52.5	50	0.952381	0.241504		0.952381	0.952381
95858_at	50	50	50	60		50	50	50	50	50	50	50	50		C76988 Mus musculus cDNA, 3' end /clone=J0023H02 /clone_end=3' /gb=C76988 /gi=2517318 /ug=Mm.24929 /len=594 /STRA=rev			52.5	50	0.952381	0.241504		0.952381	0.952381
98338_at	50	60	50	50		50	50	50	50	50	50	50	50		Engrailed 2 /cds=(0,374) /gb=Y00203 /gi=49588 /ug=Mm.4298 /len=375 /STRA=for			52.5	50	0.952381	0.241504		0.952381	0.952381
94168_at	50	58	50	59		50	60	50	50	50	50	50	50		Interleukin 13 /cds=(69,464) /gb=M23504 /gi=533246 /ug=Mm.1284 /len=1207 /STRA=for			54.25	51.6667	0.952381	0.39138		0.921659	0.921659
95501_at	77	106	77	50		50	50	97	52	93	101	75	50		UI-M-BH2.1-aoz-h-06-0-UI.s2 Mus musculus cDNA, 3' end /clone=UI-M-BH2.1-aoz-h-06-0-UI /clone_end=3' /gb=AW122970 /gi=6098500 /ug=Mm.25157 /len=435 /STRA=for			77.5	73.8333	0.952688	0.822868		0.645161	0.967742
95447_at	87	176	146	120		50	105	161	181	138	121	95	103		vr04e08.r1 Mus musculus cDNA, 5' end /clone=IMAGE-1110854 /clone_end=5' /gb=AA683761 /gi=2670347 /ug=Mm.24601 /len=335 /STRA=for			132.25	126	0.952741	0.828312		0.778828	0.718336
92507_at	50	62	50	50		50	50	50	50	53	50	50	50		Utrophin /cds=(0,10289) /gb=Y12229 /gi=1934962 /ug=Mm.42222 /len=11096 /STRA=for			53	50.5	0.95283	0.337895		0.943396	0.943396
101971_at	434	530	217	276		188	160	460	445	350	480	257	218		UI-M-BH1-amj-e-08-0-UI.s2 Mus musculus cDNA, 3' end /clone=UI-M-BH1-amj-e-08-0-UI /clone_end=3' /gb=AW061255 /gi=6009006 /ug=Mm.9495 /len=495 /STRA=for			364.25	347.167	0.9531	0.857146		0.59849	0.705559
104256_at	69	50	50	52		53	50	60	53	50	50	50	50		ub73a05.r1 Mus musculus cDNA, 5' end /clone=IMAGE-1383344 /clone_end=5' /gb=AI120844 /gi=3521168 /ug=Mm.28391 /len=462 /STRA=for			55.25	52.6667	0.953243	0.550599		0.904977	0.904977
103485_at	50	102	50	58		50	50	60	87	50	75	50	63		vv06f02.r1 Mus musculus cDNA, 5' end /clone=IMAGE-1210875 /clone_end=5' /gb=AA795415 /gi=2858370 /ug=Mm.22139 /len=298 /STRA=for			65	62	0.953846	0.819232		0.969231	0.769231
98036_at	509	720	550	396		614	558	538	490	501	411	470	575		vq22g06.r1 Mus musculus cDNA, 5' end /clone=IMAGE-1095034 /clone_end=5' /gb=AA870525 /gi=2965970 /ug=Mm.33890 /len=608 /STRA=for			543.75	518.667	0.95387	0.703979		1.05747	0.864368
96344_at	351	279	437	314		341	276	342	240	393	384	136	215		M.musculus gene for beta-enolase /cds=(66,1370) /gb=X61600 /gi=50848 /ug=Mm.29994 /len=1450 /STRA=for			345.25	329.333	0.953898	0.706716		0.622737	0.393917
104148_at	361	506	375	378		295	365	448	416	379	415	335	436		vz51d08.r1 Mus musculus cDNA, 5' end /clone=IMAGE-1329999 /clone_end=5' /gb=AA939571 /gi=3100348 /ug=Mm.22183 /len=420 /STRA=for			405	386.333	0.953909	0.638811		1.07654	0.82716
96663_at	65	81	50	50		50	50	81	67	54	50	50	50		Surfeit gene 6 /cds=(9,1076) /gb=X92842 /gi=2632078 /ug=Mm.27364 /len=2570 /STRA=for			61.5	58.6667	0.95393	0.754573		0.813008	0.813008
95480_at	173	169	120	148		56	131	215	204	120	147	116	106		UI-M-AO1-aep-d-12-0-UI.s1 Mus musculus cDNA, 3' end /clone=UI-M-AO1-aep-d-12-0-UI /clone_end=3' /gb=AI847163 /gi=5491069 /ug=Mm.24855 /len=148 /STRA=for			152.5	145.5	0.954098	0.829017		0.695082	0.760656
95621_at	50	68	50	50		50	60	50	50	50	52	50	87		vo47h02.r1 Mus musculus cDNA, 5' end /clone=IMAGE-1053075 /clone_end=5' /gb=AA606367 /gi=2454825 /ug=Mm.28042 /len=254 /STRA=for			54.5	52	0.954128	0.559088		1.59633	0.917431
104706_at	50	70	50	50		50	50	65	50	50	50	50	50		Mus musculus peroxisomal PTS2 receptor mRNA, complete cds /cds=(92,1048) /gb=U69171 /gi=1890656 /ug=Mm.2440 /len=1468 /STRA=for			55	52.5	0.954545	0.633139		0.909091	0.909091
101030_at	379	1156	636	570		445	467	530	457	1129	897	652	412		M.musculus rhoB gene /cds=(0,590) /gb=X99963 /gi=1491740 /ug=Mm.687 /len=591 /STRA=for			685.25	654.167	0.954639	0.878817		0.60124	0.951478
92783_at	601	520	335	469		288	266	594	727	386	496	503	303		Growth hormone /cds=(61,711) /gb=X02891 /gi=51067 /ug=Mm.1240 /len=777 /STRA=for			481.25	459.5	0.954805	0.836822		0.62961	1.04519
93447_at	129	72	133	50		50	50	66	117	193	74	139	139		mv63g05.r1 Mus musculus cDNA, 5' end /clone=IMAGE-659768 /clone_end=5' /gb=AA220047 /gi=1834130 /ug=Mm.66913 /len=344 /STRA=for			96	91.6667	0.954861	0.89778		1.44792	1.44792
97154_f_at	50	94	109	59		50	50	73	50	116	108	129	70		ve94b06.r1 Mus musculus cDNA, 5' end /clone=IMAGE-833843 /clone_end=5' /gb=AA413015 /gi=2071560 /ug=Mm.35121 /len=535 /STRA=for			78	74.5	0.955128	0.859215		0.897436	1.65385
99988_at	90	128	104	50		87	50	103	89	89	115	72	50		UI-M-BH2.2-aor-b-02-0-UI.s1 Mus musculus cDNA, 3' end /clone=UI-M-BH2.2-aor-b-02-0-UI /clone_end=3' /gb=AW122115 /gi=6097532 /ug=Mm.4471 /len=403 /STRA=for			93	88.8333	0.955197	0.813404		0.537634	0.774194
94854_g_at	233	706	304	275		245	270	403	309	445	504	173	200		Guanine nucleotide binding protein, beta 1 /cds=(39,1061) /gb=U29055 /gi=868168 /ug=Mm.2344 /len=1410 /STRA=for			379.5	362.667	0.955643	0.872576		0.527009	0.455863
101492_at	59	120	50	110		50	55	77	100	80	124	59	50		UI-M-BH1-alr-a-08-0-UI.s1 Mus musculus cDNA, 3' end /clone=UI-M-BH1-alr-a-08-0-UI /clone_end=3' /gb=AW047032 /gi=5907561 /ug=Mm.7906 /len=338 /STRA=for			84.75	81	0.955752	0.855329		0.589971	0.696165
97013_f_at	146	268	108	126		95	99	196	229	233	77	149	211		UI-M-BH1-alf-e-03-0-UI.s1 Mus musculus cDNA, 3' end /clone=UI-M-BH1-alf-e-03-0-UI /clone_end=3' /gb=AW046124 /gi=5906653 /ug=Mm.88950 /len=249 /STRA=rev			162	154.833	0.955761	0.881683		1.30247	0.919753
102793_at	50	50	50	62		52	50	50	50	50	52	58	50		Mus musculus mRNA for HGT keratin, partial cds /cds=(0,163) /gb=D86423 /gi=1944398 /ug=Mm.13979 /len=508 /STRA=for			53	50.6667	0.955975	0.364982		0.943396	1.09434
98428_at	76	88	62	78		50	50	89	99	55	93	50	50		Mus musculus mRNA for spastin protein orthologue (Spast gene) /cds=(0,1516) /gb=AJ246002 /gi=6273571 /ug=Mm.34234 /len=1689 /STRA=for			76	72.6667	0.95614	0.798338		0.657895	0.657895
94020_at	50	135	50	62		50	50	99	96	50	81	50	53		Mus musculus mRNA for A6 related protein /cds=(17,1066) /gb=Y17808 /gi=4468631 /ug=Mm.21852 /len=1435 /STRA=for			74.25	71	0.956229	0.87628		0.713805	0.673401
102829_s_at	59	85	50	50		50	50	62	88	50	50	50	50		M.musculus mRNA for MAP Kinase Kinase /cds=(146,1150) /gb=X97052 /gi=1495701 /ug=Mm.14487 /len=1152 /STRA=for			61	58.3333	0.956284	0.800153		0.819672	0.819672
101457_at	50	94	50	50		50	50	51	63	86	50	50	50		Janus kinase 2 /cds=(93,3482) /gb=L16956 /gi=309463 /ug=Mm.809 /len=3629 /STRA=for			61	58.3333	0.956284	0.821138		0.819672	0.819672
98851_at	50	50	50	64		50	50	50	57	50	50	50	50		Mouse musashi-1 gene for RNA-binding protein, complete cds /cds=(63,1151) /gb=D49654 /gi=1434856 /ug=Mm.5077 /len=1551 /STRA=for			53.5	51.1667	0.956386	0.477011		0.934579	0.934579
102012_at	389	580	213	334		50	215	517	469	521	403	332	155		Mus musculus mRNA for RA70, complete cds /cds=(65,1141) /gb=AB014485 /gi=4730810 /ug=Mm.10019 /len=1554 /STRA=for			379	362.5	0.956464	0.888928		0.408971	0.875989
104036_at	195	386	258	157		110	93	293	380	220	333	129	309		UI-M-AO1-aej-f-01-0-UI.s1 Mus musculus cDNA, 3' end /clone=UI-M-AO1-aej-f-01-0-UI /clone_end=3' /gb=AI845447 /gi=5489353 /ug=Mm.21440 /len=343 /STRA=for			249	238.167	0.956493	0.884494		1.24096	0.518072
95511_at	50	93	76	50		50	68	50	77	89	52	50	50		Integrin alpha 6 /cds=(181,3402) /gb=X69902 /gi=408127 /ug=Mm.25232 /len=3756 /STRA=for			67.25	64.3333	0.956629	0.811228		0.743494	0.743494
96302_at	346	271	446	359		299	346	371	354	308	363	414	237		vu26g06.r1 Mus musculus cDNA, 5' end /clone=IMAGE-1181818 /clone_end=5' /gb=AA711516 /gi=2721434 /ug=Mm.29915 /len=260 /STRA=rev			355.5	340.167	0.956868	0.646284		0.666667	1.16456
103075_at	50	59	50	50		50	50	50	50	50	50	50	50		POU domain, class 5, transcription factor 1 /cds=(49,1182) /gb=M34381 /gi=200117 /ug=Mm.17031 /len=1324 /STRA=for			52.25	50	0.956938	0.241504		0.956938	0.956938
104316_at	59	50	50	50		50	50	50	50	50	50	60	50		vw54h09.x1 Mus musculus cDNA, 3' end /clone=IMAGE-1247681 /clone_end=3' /gb=AI646098 /gi=4724573 /ug=Mm.22414 /len=501 /STRA=rev			52.25	50	0.956938	0.241504		0.956938	1.14833
94977_at	59	50	50	50		50	50	50	50	50	50	50	62		Inositol 1,4,5-triphosphate receptor 1 /cds=(328,8577) /gb=X15373 /gi=53568 /ug=Mm.2726 /len=9841 /STRA=for			52.25	50	0.956938	0.241504		1.1866	0.956938
97139_at	50	59	50	50		50	50	50	50	50	50	50	50		C77614 Mus musculus cDNA, 3' end /clone=J0034E10 /clone_end=3' /gb=C77614 /gi=2517944 /ug=Mm.34934 /len=628 /STRA=rev			52.25	50	0.956938	0.241504		0.956938	0.956938
97720_at	50	50	50	59		50	50	50	50	50	50	50	50		Mus musculus clone WS2a43 mutated immunoglobulin heavy chain (S107V1) gene, partial cds /cds=(0,257) /gb=AF000913 /gi=2232095 /ug=Mm.3902 /len=258 /STRA=for			52.25	50	0.956938	0.241504		0.956938	0.956938
103260_at	144	247	203	166		114	110	245	217	187	218	105	84		UI-M-AL0-abp-d-10-0-UI.s1 Mus musculus cDNA, 3' end /clone=UI-M-AL0-abp-d-10-0-UI /clone_end=3' /gb=AI838553 /gi=5472731 /ug=Mm.208 /len=491 /STRA=rev			190	181.833	0.957018	0.817174		0.442105	0.552632
99363_at	67	50	50	51		50	55	50	50	52	56	50	50		C77554 Mus musculus cDNA, 3' end /clone=J0033E08 /clone_end=3' /gb=C77554 /gi=2517884 /ug=Mm.5621 /len=640 /STRA=rev			54.5	52.1667	0.957187	0.532627		0.917431	0.917431
92310_at	840	1569	1194	1159		641	901	1181	1177	1688	1250	1093	1156		Mus musculus (clone 2) serum inducible kinase (SNK) mRNA, mRNA sequence /cds=UNKNOWN /gb=M96163 /gi=200999 /ug=Mm.380 /len=2772 /STRA=for			1190.5	1139.67	0.957301	0.819154		0.971021	0.918102
95490_at	841	1219	1173	1248		737	710	1317	1417	1231	1023	808	951		UI-M-BH2.3-aob-b-02-0-UI.s1 Mus musculus cDNA, 3' end /clone=UI-M-BH2.3-aob-b-02-0-UI /clone_end=3' /gb=AW120891 /gi=6096224 /ug=Mm.25045 /len=178 /STRA=for			1120.25	1072.5	0.957376	0.786293		0.848918	0.721268
103427_at	50	83	50	60		50	50	64	77	58	50	53	53		UI-M-BH2.1-apg-e-07-0-UI.s1 Mus musculus cDNA, 3' end /clone=UI-M-BH2.1-apg-e-07-0-UI /clone_end=3' /gb=AW123223 /gi=6098793 /ug=Mm.18968 /len=410 /STRA=for			60.75	58.1667	0.957476	0.762956		0.872428	0.872428
99119_at	4159	6766	4713	5072		4985	4337	5349	4747	5232	5098	4079	4333		Cofilin 1, non-muscle /cds=(94,594) /gb=D00472 /gi=220383 /ug=Mm.4024 /len=1134 /STRA=for			5177.5	4958	0.957605	0.661121		0.83689	0.787832
98951_at	162	197	93	130		143	134	103	106	178	172	192	144		UI-M-AO1-aei-b-08-0-UI.s1 Mus musculus cDNA, 3' end /clone=UI-M-AO1-aei-b-08-0-UI /clone_end=3' /gb=AI843258 /gi=5477471 /ug=Mm.2875 /len=308 /STRA=for			145.5	139.333	0.957617	0.80281		0.989691	1.31959
103205_at	50	138	50	53		50	50	58	100	81	79	50	50		uc55f07.r1 Mus musculus cDNA, 5' end /clone=IMAGE-1429573 /clone_end=5' /gb=AI286861 /gi=3926614 /ug=Mm.19185 /len=253 /STRA=for			72.75	69.6667	0.957617	0.881663		0.687285	0.687285
96256_at	458	659	264	541		149	307	611	558	662	474	550	455		Anti-oxidant protein 1 /cds=(47,820) /gb=M28723 /gi=309435 /ug=Mm.29821 /len=1382 /STRA=for			480.5	460.167	0.957683	0.869643		0.94693	1.14464
100073_at	115	159	111	80		50	88	144	165	112	109	83	66		UI-M-BH1-aku-h-09-0-UI.s1 Mus musculus cDNA, 3' end /clone=UI-M-BH1-aku-h-09-0-UI /clone_end=3' /gb=AW045965 /gi=5906494 /ug=Mm.45225 /len=554 /STRA=for			116.25	111.333	0.957706	0.845329		0.567742	0.713978
95031_at	50	63	50	50		50	50	50	50	50	56	50	50		UI-M-BH1-amu-f-06-0-UI.s1 Mus musculus cDNA, 3' end /clone=UI-M-BH1-amu-f-06-0-UI /clone_end=3' /gb=AW060212 /gi=6007963 /ug=Mm.27520 /len=378 /STRA=for			53.25	51	0.957746	0.453708		0.938967	0.938967
94397_at	50	122	50	50		54	50	67	68	59	93	107	51		vr79a09.s1 Mus musculus cDNA, 5' end /clone=IMAGE-1134904 /clone_end=5' /gb=AA690091 /gi=2691027 /ug=Mm.25776 /len=347 /STRA=for			68	65.1667	0.958333	0.865874		0.75	1.57353
97536_at	116	181	90	143		91	107	133	118	143	170	76	124		UI-M-BH1-ald-e-10-0-UI.s1 Mus musculus cDNA, 3' end /clone=UI-M-BH1-ald-e-10-0-UI /clone_end=3' /gb=AW046650 /gi=5907179 /ug=Mm.3308 /len=336 /STRA=for			132.5	127	0.958491	0.799918		0.935849	0.573585
95692_at	629	723	409	630		391	531	712	732	561	511	684	526		UI-M-BH0-aiw-c-06-0-UI.s1 Mus musculus cDNA, 3' end /clone=UI-M-BH0-aiw-c-06-0-UI /clone_end=3' /gb=AI852514 /gi=5496420 /ug=Mm.29655 /len=298 /STRA=for			597.75	573	0.958595	0.776829		0.879967	1.14429
103363_at	67	60	65	50		50	50	73	75	50	50	52	50		uo45c03.x2 Mus musculus cDNA, 3' end /clone=IMAGE-2645476 /clone_end=3' /gb=AW214244 /gi=6520698 /ug=Mm.18513 /len=455 /STRA=for			60.5	58	0.958678	0.730523		0.826446	0.859504
103091_at	50	92	50	50		50	50	73	75	50	50	50	50		Avian reticuloendotheliosis viral (v-rel) oncogene related B /cds=(33,1709) /gb=M83380 /gi=200683 /ug=Mm.1741 /len=2055 /STRA=for			60.5	58	0.958678	0.816781		0.826446	0.826446
103288_at	67	53	50	67		73	50	59	50	58	51	61	50		Mus musculus receptor interacting protein 140 mRNA, complete cds /cds=(371,3856) /gb=AF053062 /gi=3820493 /ug=Mm.20895 /len=4307 /STRA=for			59.25	56.8333	0.959212	0.68644		0.843882	1.02954
97813_at	975	1151	878	1018		1025	872	1049	1025	838	980	1009	886		Avian reticuloendotheliosis viral (v-rel) oncogene homolog A /cds=(60,1709) /gb=M61909 /gi=200025 /ug=Mm.28170 /len=2424 /STRA=for			1005.5	964.833	0.959556	0.540703		0.881154	1.00348
101867_at	133	184	50	79		50	50	185	177	128	52	161	50		Mus musculus glycerol-3-phosphate acyltransferase gene, nuclear gene encoding mitochondrial protein, 5' region and partial cds /cds=(411,425) /gb=U11680 /gi=786006 /ug=Mm.87773 /len=426 /STRA=rev			111.5	107	0.959641	0.914282		0.44843	1.44395
103926_at	134	219	154	130		141	118	172	133	147	206	128	89		AV380793 Mus musculus cDNA, 3' end /clone=9230102C24 /clone_end=3' /gb=AV380793 /gi=6429870 /ug=Mm.25082 /len=255 /STRA=rev			159.25	152.833	0.959707	0.786398		0.55887	0.803768
93997_at	79	198	125	71		50	63	159	180	117	112	129	54		UI-M-BH0-ajy-h-08-0-UI.s1 Mus musculus cDNA, 3' end /clone=UI-M-BH0-ajy-h-08-0-UI /clone_end=3' /gb=AI853475 /gi=5497381 /ug=Mm.21761 /len=472 /STRA=for			118.25	113.5	0.959831	0.89484		0.45666	1.09091
95543_at	300	1132	305	330		164	215	717	520	612	748	293	205		UI-M-AK1-aeq-g-04-0-UI.s1 Mus musculus cDNA, 3' end /clone=UI-M-AK1-aeq-g-04-0-UI /clone_end=3' /gb=AI843046 /gi=5477259 /ug=Mm.27685 /len=432 /STRA=rev			516.75	496	0.959845	0.922529		0.39671	0.567005
103326_at	50	50	50	59		50	50	51	50	50	50	50	50		UI-M-BH0-aji-a-12-0-UI.s1 Mus musculus cDNA, 3' end /clone=UI-M-BH0-aji-a-12-0-UI /clone_end=3' /gb=AI852663 /gi=5496569 /ug=Mm.1795 /len=357 /STRA=rev			52.25	50.1667	0.960128	0.278243		0.956938	0.956938
93366_r_at	386	578	352	424		145	358	492	484	569	458	467	317		UI-M-AL0-abw-e-03-0-UI.s1 Mus musculus cDNA, 3' end /clone=UI-M-AL0-abw-e-03-0-UI /clone_end=3' /gb=AI838149 /gi=5472362 /ug=Mm.18972 /len=402 /STRA=for			435	417.667	0.960153	0.845416		0.728736	1.07356
97407_at	83	125	98	96		53	50	93	105	136	142	51	65		UI-M-AH1-agp-e-07-0-UI.s1 Mus musculus cDNA, 3' end /clone=UI-M-AH1-agp-e-07-0-UI /clone_end=3' /gb=AI848025 /gi=5491931 /ug=Mm.29926 /len=435 /STRA=for			100.5	96.5	0.960199	0.855646		0.646766	0.507463
100040_at	246	295	185	232		139	159	289	255	296	242	201	134		UI-M-AK1-aes-b-06-0-UI.s1 Mus musculus cDNA, 3' end /clone=UI-M-AK1-aes-b-06-0-UI /clone_end=3' /gb=AI843081 /gi=5477294 /ug=Mm.44225 /len=232 /STRA=for			239.5	230	0.960334	0.810062		0.559499	0.839248
92339_at	61	50	50	50		50	50	54	50	50	50	65	50		M.musculus mRNA for TAFI48 /cds=(108,1469) /gb=Y09972 /gi=1842203 /ug=Mm.39081 /len=2398 /STRA=for			52.75	50.6667	0.960506	0.397024		0.947867	1.23223
93795_at	142	180	120	82		99	105	167	141	130	113	99	59		UI-M-BH2.1-apw-b-07-0-UI.s1 Mus musculus cDNA, 3' end /clone=UI-M-BH2.1-apw-b-07-0-UI /clone_end=3' /gb=AW124626 /gi=6100156 /ug=Mm.21399 /len=416 /STRA=for			131	125.833	0.96056	0.810064		0.450382	0.755725
99656_at	177	307	163	166		107	158	233	256	188	230	232	165		UI-M-AJ1-ahd-h-10-0-UI.s1 Mus musculus cDNA, 3' end /clone=UI-M-AJ1-ahd-h-10-0-UI /clone_end=3' /gb=AI849027 /gi=5492933 /ug=Mm.43765 /len=419 /STRA=for			203.25	195.333	0.96105	0.846292		0.811808	1.14145
93016_at	250	464	416	325		269	231	527	356	335	380	321	180		Mus musculus testis 14-3-3 protein theta-subtype mRNA, complete cds /cds=(20,757) /gb=U56243 /gi=1777958 /ug=Mm.14722 /len=761 /STRA=for			363.75	349.667	0.961283	0.833195		0.494845	0.882474
102994_at	50	58	50	50		50	50	50	50	50	50	50	50		Signal transducer and activator of transcription 4 /cds=(33,2282) /gb=U06923 /gi=458707 /ug=Mm.1550 /len=2533 /STRA=for			52	50	0.961538	0.241504		0.961538	0.961538
104695_at	50	50	58	50		50	50	50	50	50	50	50	50		vx72d06.x1 Mus musculus cDNA, 3' end /clone=IMAGE-1280747 /clone_end=3' /gb=AI639864 /gi=4702973 /ug=Mm.33622 /len=347 /STRA=for			52	50	0.961538	0.241504		0.961538	0.961538
97733_at	50	58	50	50		50	50	50	50	50	50	50	50		Mus musculus Balb/C clone R13 adenosine receptor subtype mRNA, complete cds /cds=(33,1031) /gb=U05673 /gi=498337 /ug=Mm.3938 /len=1076 /STRA=for			52	50	0.961538	0.241504		0.961538	0.961538
98340_at	50	58	50	50		50	50	50	50	50	50	50	50		EST00652 Mus musculus cDNA, 5' end /clone=C0001A09 /clone_end=5' /gb=AA407332 /gi=2065567 /ug=Mm.43174 /len=365 /STRA=rev			52	50	0.961538	0.241504		0.961538	0.961538
98958_at	50	58	50	50		50	50	50	50	50	50	50	50		vt81g11.r1 Mus musculus cDNA, 5' end /clone=IMAGE-1177604 /clone_end=5' /gb=AA759910 /gi=2807704 /ug=Mm.28772 /len=254 /STRA=for			52	50	0.961538	0.241504		0.961538	0.961538
93509_at	122	303	140	165		65	117	281	259	156	175	124	157		Ubiquitin-conjugating enzyme E2B (RAD6 homology) /cds=(43,501) /gb=U57690 /gi=1373352 /ug=Mm.1920 /len=923 /STRA=for			182.5	175.5	0.961644	0.898629		0.860274	0.679452
102850_at	717	730	766	781		740	405	752	641	874	907	140	286		Mus musculus non-receptor protein tyrosine kinase Ack mRNA, complete cds /cds=(267,3434) /gb=AF037260 /gi=2921446 /ug=Mm.1483 /len=4214 /STRA=for			748.5	719.833	0.961701	0.767261		0.382098	0.187041
97460_at	936	1278	874	912		821	552	1064	1031	1185	1118	769	710		UI-M-BH2.1-aoz-c-09-0-UI.s1 Mus musculus cDNA, 3' end /clone=UI-M-BH2.1-aoz-c-09-0-UI /clone_end=3' /gb=AW122823 /gi=6098353 /ug=Mm.30272 /len=219 /STRA=for			1000	961.833	0.961833	0.793616		0.71	0.769
103762_at	331	544	305	291		167	196	533	631	312	284	221	278		UI-M-BH0-air-b-06-0-UI.s1 Mus musculus cDNA, 3' end /clone=UI-M-BH0-air-b-06-0-UI /clone_end=3' /gb=AI853340 /gi=5497246 /ug=Mm.24632 /len=461 /STRA=for			367.75	353.833	0.962157	0.899223		0.755948	0.600952
94412_at	62	99	60	83		50	50	78	80	131	50	86	104		Mus musculus CDK2 gene intron V containing the alternatively spliced exon Ve /cds=(0,123) /gb=AJ223733 /gi=2842420 /ug=Mm.260 /len=124 /STRA=for			76	73.1667	0.962719	0.87719		1.36842	1.13158
98575_at	761	803	770	724		584	523	1113	960	655	583	593	486		Fatty acid synthase /cds=(0,2516) /gb=X13135 /gi=50947 /ug=Mm.3760 /len=3295 /STRA=for			764.5	736.333	0.963157	0.825625		0.63571	0.77567
100877_at	641	643	462	504		441	381	599	687	408	735	532	568		ui14c07.r1 Mus musculus cDNA, 5' end /clone=IMAGE-1851276 /clone_end=5' /gb=AI194274 /gi=3745481 /ug=Mm.53 /len=480 /STRA=for			562.5	541.833	0.963259	0.815983		1.00978	0.945778
103242_at	280	439	159	310		303	230	320	345	236	283	243	176		UI-M-BH2.1-apm-h-06-0-UI.s1 Mus musculus cDNA, 3' end /clone=UI-M-BH2.1-apm-h-06-0-UI /clone_end=3' /gb=AW123834 /gi=6099364 /ug=Mm.20417 /len=403 /STRA=for			297	286.167	0.963524	0.837568		0.592593	0.818182
100043_f_at	132	143	59	50		56	50	131	156	79	83	74	61		ui43c05.x1 Mus musculus cDNA, 3' end /clone=IMAGE-1885160 /clone_end=3' /gb=AI173973 /gi=3720115 /ug=Mm.44242 /len=459 /STRA=for			96	92.5	0.963542	0.906242		0.635417	0.770833
99543_s_at	166	244	157	241		136	175	270	157	211	219	190	186		Mus musculus mRNA for deoxyguanosine kinase 1 /cds=(5,838) /gb=AJ133749 /gi=4877286 /ug=Mm.42234 /len=1040 /STRA=for			202	194.667	0.963696	0.818636		0.920792	0.940594
92540_f_at	552	988	589	732		485	519	797	758	808	769	486	365		M.musculus spermidine synthase gene /cds=(75,983) /gb=Z67748 /gi=1061191 /ug=Mm.10 /len=1261 /STRA=for			715.25	689.333	0.963766	0.816715		0.510311	0.679483
100530_at	345	342	353	372		223	222	373	394	450	380	314	184		Mus musculus guanine nucleotide dissociation stimulator for a ras-related GTPase mRNA, complete cds /cds=(212,2770) /gb=L07924 /gi=193572 /ug=Mm.5236 /len=3573 /STRA=for			353	340.333	0.964117	0.80205		0.521246	0.889518
96687_f_at	219	249	200	208		125	175	222	297	203	245	189	245		UI-M-BH0-ajr-f-08-0-UI.s1 Mus musculus cDNA, 3' end /clone=UI-M-BH0-ajr-f-08-0-UI /clone_end=3' /gb=AI853864 /gi=5497770 /ug=Mm.27477 /len=461 /STRA=for			219	211.167	0.964231	0.808693		1.11872	0.863014
92586_at	194	467	270	177		63	209	399	369	277	286	178	132		Glutamate dehydrogenase /cds=(76,1752) /gb=X57024 /gi=51081 /ug=Mm.10600 /len=2942 /STRA=for			277	267.167	0.964501	0.906493		0.476534	0.642599
95153_at	76	224	139	116		50	148	174	124	144	163	55	112		UI-M-AP1-agl-d-01-0-UI.s1 Mus musculus cDNA, 3' end /clone=UI-M-AP1-agl-d-01-0-UI /clone_end=3' /gb=AI845988 /gi=5489894 /ug=Mm.29476 /len=435 /STRA=for			138.75	133.833	0.964565	0.887125		0.807207	0.396396
96730_at	50	76	50	50		50	50	59	68	50	50	50	50		Tripeptidyl peptidase II /cds=(83,3871) /gb=X81323 /gi=575954 /ug=Mm.28867 /len=4650 /STRA=for			56.5	54.5	0.964602	0.763241		0.884956	0.884956
92444_f_at	79	114	52	66		50	50	105	114	70	61	77	50		Zinc finger protein 1 /cds=(320,1594) /gb=X16493 /gi=55482 /ug=Mm.4184 /len=1939 /STRA=rev			77.75	75	0.96463	0.880317		0.643087	0.990354
101580_at	886	1207	1046	1161		745	717	1085	1242	1205	1228	649	1171		UI-M-BH0-ajx-g-09-0-UI.s1 Mus musculus cDNA, 3' end /clone=UI-M-BH0-ajx-g-09-0-UI /clone_end=3' /gb=AI851220 /gi=5495126 /ug=Mm.90007 /len=344 /STRA=for			1075	1037	0.964651	0.787873		1.0893	0.603721
98006_at	128	278	147	221		101	204	301	259	103	152	147	139		Mus musculus mRNA for DNA polymerase alpha associated subunit, complete cds /cds=(235,2037) /gb=D13546 /gi=303658 /ug=Mm.320 /len=2352 /STRA=for			193.5	186.667	0.964686	0.895206		0.718346	0.75969
95968_at	50	58	50	50		50	50	50	50	51	50	50	50		C77691 Mus musculus cDNA, 3' end /clone=J0036B07 /clone_end=3' /gb=C77691 /gi=2518021 /ug=Mm.24964 /len=247 /STRA=rev			52	50.1667	0.964744	0.283527		0.961538	0.961538
94098_at	69	137	74	51		66	71	50	50	192	50	57	83		Hypocretin /cds=(91,483) /gb=AF019566 /gi=2895195 /ug=Mm.10096 /len=585 /STRA=for			82.75	79.8333	0.964753	0.929754		1.00302	0.688822
95335_at	59	101	91	71		118	129	50	50	69	50	66	109		Mus musculus chemokine receptor CX3CR1 gene, complete cds /cds=(0,1064) /gb=AF074912 /gi=4165066 /ug=Mm.20468 /len=1065 /STRA=for			80.5	77.6667	0.964803	0.891101		1.35404	0.819876
99326_at	50	50	53	77		50	50	68	50	65	50	68	106		Phospholipase A2, group IIC /cds=(178,630) /gb=U18119 /gi=1049007 /ug=Mm.5189 /len=1445 /STRA=for			57.5	55.5	0.965217	0.775257		1.84348	1.18261
102647_g_at	383	528	475	475		251	216	582	591	541	514	378	346		UI-M-BH2.2-aos-b-02-0-UI.s1 Mus musculus cDNA, 3' end /clone=UI-M-BH2.2-aos-b-02-0-UI /clone_end=3' /gb=AW122284 /gi=6097765 /ug=Mm.13148 /len=336 /STRA=for			465.25	449.167	0.965431	0.862354		0.743686	0.812466
93102_f_at	2307	2323	2133	2059		2710	2504	2050	1780	1571	2163	1953	2369		Actin, gamma 2, smooth muscle, enteric /cds=(36,1217) /gb=U20365 /gi=950001 /ug=Mm.16562 /len=1232 /STRA=for			2205.5	2129.67	0.965616	0.744455		1.07413	0.885513
102778_at	50	84	50	50		50	50	57	53	56	73	50	51		Murine B lymphocyte lineage restricted mb-1 mRNA /cds=(9,671) /gb=X13450 /gi=53015 /ug=Mm.1355 /len=985 /STRA=for			58.5	56.5	0.965812	0.80947		0.871795	0.854701
93574_at	1189	959	626	804		268	977	997	875	992	1075	726	649		Mus musculus pigment epithelium-derived factor (PEDF) mRNA, complete cds /cds=(33,1286) /gb=AF036164 /gi=3808220 /ug=Mm.2044 /len=1648 /STRA=for			894.5	864	0.965903	0.869215		0.725545	0.811627
100336_s_at	55	70	50	50		50	50	76	50	50	50	50	50		Bone gamma carboxyglutamate protein 1 /cds=(48,335) /gb=L24431 /gi=455456 /ug=Mm.87858 /len=457 /STRA=for			56.25	54.3333	0.965926	0.778344		0.888889	0.888889
102701_at	50	50	50	66		50	50	54	54	55	50	50	50		Cytochrome P450, 2b10, phenobarbitol inducible, type b /cds=UNKNOWN /gb=M21856 /gi=201968 /ug=Mm.14177 /len=1822 /STRA=for			54	52.1667	0.966049	0.603518		0.925926	0.925926
103719_at	50	57	50	50		50	50	50	50	50	50	50	50		Mus musculus major histocompatibility locus class III regions Hsc70t gene, partial cds; smRNP, G7A, NG23, MutS homolog, CLCP, NG24, NG25, and NG26 genes, complete cds; and unknown genes /cds=(0,2501) /gb=AF109905 /gi=3986751 /ug=Mm.2 /STRA=for			51.75	50	0.966184	0.241504		0.966184	0.966184
92654_at	50	57	50	50		50	50	50	50	50	50	50	50		UI-M-AJ0-abc-h-06-0-UI.s1 Mus musculus cDNA, 3' end /clone=UI-M-AJ0-abc-h-06-0-UI /clone_end=3' /gb=AI836802 /gi=5471015 /ug=Mm.44100 /len=172 /STRA=for			51.75	50	0.966184	0.241504		0.966184	0.966184
99557_at	50	57	50	50		50	50	50	50	50	50	50	50		UI-M-AH1-agr-c-03-0-UI.s1 Mus musculus cDNA, 3' end /clone=UI-M-AH1-agr-c-03-0-UI /clone_end=3' /gb=AI849565 /gi=5493471 /ug=Mm.42956 /len=253 /STRA=for			51.75	50	0.966184	0.241504		0.966184	0.966184
97953_g_at	149	164	98	103		50	68	195	239	65	128	61	110		Tuberous sclerosis 2 /cds=(90,5534) /gb=U39818 /gi=1236401 /ug=Mm.30435 /len=5637 /STRA=for			128.5	124.167	0.966278	0.92009		0.856031	0.474708
99039_g_at	445	546	386	445		308	395	490	416	526	506	354	263		Mus musculus adenylosuccinate synthetase mRNA, complete cds /cds=(82,1452) /gb=L24554 /gi=404056 /ug=Mm.39061 /len=1559 /STRA=for			455.5	440.167	0.966337	0.765789		0.577387	0.777168
104396_at	50	68	50	50		50	50	50	50	66	50	50	50		ub19g08.r1 Mus musculus cDNA, 5' end /clone=IMAGE-1378238 /clone_end=5' /gb=AI019327 /gi=3233663 /ug=Mm.28617 /len=265 /STRA=for			54.5	52.6667	0.966361	0.716653		0.917431	0.917431
93235_at	269	332	279	243		176	235	349	290	279	299	212	252		ub24c02.r1 Mus musculus cDNA, 5' end /clone=IMAGE-1378658 /clone_end=5' /gb=AI020029 /gi=3234365 /ug=Mm.5833 /len=468 /STRA=for			280.75	271.333	0.966459	0.78701		0.897596	0.75512
104473_at	87	157	155	161		126	74	210	96	138	168	135	193		vr62d03.s1 Mus musculus cDNA, 5' end /clone=IMAGE-1125221 /clone_end=5' /gb=AA693180 /gi=2694118 /ug=Mm.29887 /len=414 /STRA=for			140	135.333	0.966667	0.874843		1.37857	0.964286
104609_at	250	341	182	218		211	113	301	264	242	306	249	161		vs82f12.r1 Mus musculus cDNA, 5' end /clone=IMAGE-1152815 /clone_end=5' /gb=AA644817 /gi=2571246 /ug=Mm.24148 /len=382 /STRA=for			247.75	239.5	0.9667	0.860254		0.649849	1.00505
104602_at	123	287	107	136		57	65	177	173	264	211	132	53		UI-M-BH2.3-aoj-a-09-0-UI.s1 Mus musculus cDNA, 3' end /clone=UI-M-BH2.3-aoj-a-09-0-UI /clone_end=3' /gb=AW121972 /gi=6097329 /ug=Mm.24110 /len=474 /STRA=for			163.25	157.833	0.96682	0.921394		0.324655	0.808576
93789_s_at	592	685	422	662		375	575	676	669	578	551	762	622		Mus musculus transcriptional repressor SIN3B (Sin3B) mRNA, short form, complete cds /cds=(20,901) /gb=AF038848 /gi=2921546 /ug=Mm.2137 /len=1056 /STRA=for			590.25	570.667	0.966822	0.794921		1.05379	1.29098
104535_at	50	63	50	50		50	50	56	53	50	50	50	50		Mus musculus ATP-dependent metalloprotease FtsH1 mRNA, complete cds /cds=(172,2319) /gb=AF090430 /gi=3600099 /ug=Mm.23335 /len=2654 /STRA=for			53.25	51.5	0.967136	0.559063		0.938967	0.938967
95135_at	262	299	364	380		152	242	389	293	430	388	157	241		UI-M-AL1-ahp-e-05-0-UI.s1 Mus musculus cDNA, 3' end /clone=UI-M-AL1-ahp-e-05-0-UI /clone_end=3' /gb=AI844396 /gi=5488302 /ug=Mm.29429 /len=432 /STRA=for			326.25	315.667	0.967561	0.860818		0.738697	0.481226
93080_at	117	175	164	142		142	129	78	210	169	140	128	113		G protein gamma 3 linked gene /cds=(305,1537) /gb=AF069954 /gi=3885499 /ug=Mm.15985 /len=1654 /STRA=for			149.5	144.667	0.96767	0.848707		0.755853	0.856187
104065_at	64	50	50	53		50	50	50	50	50	65	50	50		uo68g01.x1 Mus musculus cDNA, 3' end /clone=IMAGE-2647728 /clone_end=3' /gb=AW212878 /gi=6519026 /ug=Mm.21596 /len=280 /STRA=for			54.25	52.5	0.967742	0.679596		0.921659	0.921659
94458_at	50	60	50	50		50	50	50	55	50	50	50	50		M.musculus mRNA for caspase-6 /cds=(24,854) /gb=Y13087 /gi=2094811 /ug=Mm.28814 /len=1229 /STRA=for			52.5	50.8333	0.968254	0.477011		0.952381	0.952381
93711_at	50	99	50	64		50	50	50	50	75	107	50	50		Secretory protein SEC23 related gene (S. cerevisiae) /cds=(0,1721) /gb=D12713 /gi=220493 /ug=Mm.86530 /len=1722 /STRA=for			65.75	63.6667	0.968314	0.893436		0.760456	0.760456
102657_at	65	50	50	109		50	50	100	50	97	51	50	50		H2.0-like homeo box gene /cds=(468,1898) /gb=X58250 /gi=51330 /ug=Mm.1347 /len=2265 /STRA=for			68.5	66.3333	0.96837	0.900814		0.729927	0.729927
104301_at	112	195	131	132		134	108	228	166	142	50	121	131		UI-M-BH0-aip-e-01-0-UI.s1 Mus musculus cDNA, 3' end /clone=UI-M-BH0-aip-e-01-0-UI /clone_end=3' /gb=AI852414 /gi=5496360 /ug=Mm.22351 /len=425 /STRA=for			142.5	138	0.968421	0.896322		0.919298	0.849123
95637_at	755	1699	862	793		743	574	1116	997	1240	1301	538	648		UI-M-AO0-abz-e-02-0-UI.s1 Mus musculus cDNA, 3' end /clone=UI-M-AO0-abz-e-02-0-UI /clone_end=3' /gb=AI838592 /gi=5472805 /ug=Mm.28095 /len=321 /STRA=for			1027.25	995.167	0.968768	0.892557		0.63081	0.523728
103033_at	73	67	110	94		140	81	75	52	50	102	58	111		Mouse mRNA for sex-limited protein Slp(w7) alpha-gamma chain /cds=(0,1784) /gb=X06454 /gi=54105 /ug=Mm.16106 /len=1893 /STRA=for			86	83.3333	0.968992	0.891589		1.2907	0.674419
94522_at	364	569	405	377		390	347	446	462	404	444	386	443		Mus musculus dynactin light chain (P24) mRNA, complete cds /cds=(12,572) /gb=AF098508 /gi=4323147 /ug=Mm.29025 /len=819 /STRA=for			428.75	415.5	0.969096	0.768915		1.03324	0.900292
97347_at	82	135	141	107		100	129	148	70	111	118	120	60		vw78c04.r1 Mus musculus cDNA, 5' end /clone=IMAGE-1261062 /clone_end=5' /gb=AA838868 /gi=2914963 /ug=Mm.29618 /len=493 /STRA=rev			116.25	112.667	0.969176	0.841135		0.516129	1.03226
96195_at	91	89	54	116		89	71	105	99	76	69	84	101		Mus musculus p130Cas-related protein Sin mRNA, complete cds /cds=(57,1739) /gb=U57686 /gi=1373343 /ug=Mm.28543 /len=2211 /STRA=for			87.5	84.8333	0.969524	0.838862		1.15429	0.96
98626_at	357	571	286	417		224	279	471	456	476	466	358	652		UI-M-BH1-ama-b-05-0-UI.s1 Mus musculus cDNA, 3' end /clone=UI-M-BH1-ama-b-05-0-UI /clone_end=3' /gb=AW047503 /gi=5908032 /ug=Mm.38746 /len=264 /STRA=for			407.75	395.333	0.969548	0.872573		1.59902	0.877989
93481_at	50	136	50	50		71	82	96	50	50	67	50	81		UI-M-AN1-afi-h-09-0-UI.s1 Mus musculus cDNA, 3' end /clone=UI-M-AN1-afi-h-09-0-UI /clone_end=3' /gb=AI846720 /gi=5490626 /ug=Mm.7124 /len=161 /STRA=for			71.5	69.3333	0.969697	0.913516		1.13287	0.699301
103614_at	120	161	84	136		104	91	214	131	106	83	139	138		UI-M-BH1-aln-a-06-0-UI.s1 Mus musculus cDNA, 3' end /clone=UI-M-BH1-aln-a-06-0-UI /clone_end=3' /gb=AW047899 /gi=5908428 /ug=Mm.20225 /len=403 /STRA=rev			125.25	121.5	0.97006	0.895643		1.1018	1.10978
93030_at	3874	6007	3638	4268		2725	3594	5087	5297	4672	4511	3385	4044		UI-M-AJ1-ahe-c-02-0-UI.s1 Mus musculus cDNA, 3' end /clone=UI-M-AJ1-ahe-c-02-0-UI /clone_end=3' /gb=AI844457 /gi=5488363 /ug=Mm.14833 /len=347 /STRA=for			4446.75	4314.33	0.970222	0.844699		0.909428	0.76123
97414_at	278	384	227	248		59	169	453	452	269	253	341	134		UI-M-BH0-aiq-g-11-0-UI.s1 Mus musculus cDNA, 3' end /clone=UI-M-BH0-aiq-g-11-0-UI /clone_end=3' /gb=AI852022 /gi=5495928 /ug=Mm.29960 /len=383 /STRA=for			284.25	275.833	0.97039	0.922802		0.471416	1.19965
98989_at	63	85	50	50		50	50	78	82	50	51	67	50		7-dehydrocholesterol reductase /cds=(39,1454) /gb=AF057368 /gi=3283173 /ug=Mm.3747 /len=2377 /STRA=rev			62	60.1667	0.97043	0.862143		0.806452	1.08065
93994_at	58	102	89	78		50	50	71	68	145	92	50	50		uo82g04.x1 Mus musculus cDNA, 3' end /clone=IMAGE-2649078 /clone_end=3' /gb=AW212131 /gi=6518137 /ug=Mm.21754 /len=566 /STRA=for			81.75	79.3333	0.970438	0.90527		0.611621	0.611621
92191_at	50	76	50	50		50	50	59	50	50	70	50	50		ui85f10.x1 Mus musculus cDNA, 3' end /clone=IMAGE-1889227 /clone_end=3' /gb=AI255450 /gi=3862975 /ug=Mm.34009 /len=509 /STRA=for			56.5	54.8333	0.970501	0.808283		0.884956	0.884956
93365_s_at	506	668	335	401		247	294	517	580	609	534	453	335		UI-M-AL0-abw-e-03-0-UI.s1 Mus musculus cDNA, 3' end /clone=UI-M-AL0-abw-e-03-0-UI /clone_end=3' /gb=AI838149 /gi=5472362 /ug=Mm.18972 /len=402 /STRA=for			477.5	463.5	0.970681	0.889049		0.701571	0.948691
101821_at	50	56	50	50		50	50	50	50	50	50	50	50		Cholinergic receptor, muscarinic 4 /cds=(0,1439) /gb=X63473 /gi=296913 /ug=Mm.57181 /len=1440 /STRA=for			51.5	50	0.970874	0.241504		0.970874	0.970874
103812_at	50	56	50	50		50	50	50	50	50	50	50	50		Mus musculus calcium-sensitive chloride conductance protein-1 (mCLCA1) mRNA, complete cds /cds=(17,2725) /gb=AF047838 /gi=3925280 /ug=Mm.20897 /len=3022 /STRA=rev			51.5	50	0.970874	0.241504		0.970874	0.970874
94491_at	50	56	50	50		50	50	50	50	50	50	50	50		UI-M-BH2.1-apg-c-01-0-UI.s1 Mus musculus cDNA, 3' end /clone=UI-M-BH2.1-apg-c-01-0-UI /clone_end=3' /gb=AW123194 /gi=6098764 /ug=Mm.28912 /len=509 /STRA=for			51.5	50	0.970874	0.241504		0.970874	0.970874
96583_s_at	50	56	50	50		50	50	50	50	50	50	50	50		Mus musculus kinesin heavy chain mRNA, partial cds /cds=(0,492) /gb=AF053473 /gi=2981493 /ug=Mm.30355 /len=493 /STRA=for			51.5	50	0.970874	0.241504		0.970874	0.970874
101382_at	50	73	50	103		50	53	101	98	50	50	63	64		Mus musculus transcription factor PBX2 (PBX2) mRNA, complete cds /cds=(85,1377) /gb=AF020198 /gi=2432012 /ug=Mm.7103 /len=2805 /STRA=for			69	67	0.971014	0.905119		0.927536	0.913043
96930_at	50	91	50	52		59	50	66	50	50	79	50	67		UI-M-AL1-ahj-d-06-0-UI.s1 Mus musculus cDNA, 3' end /clone=UI-M-AL1-ahj-d-06-0-UI /clone_end=3' /gb=AI844128 /gi=5488034 /ug=Mm.30169 /len=328 /STRA=for			60.75	59	0.971193	0.865245		1.10288	0.823045
101036_at	533	637	397	568		299	523	392	660	730	507	525	424		UI-M-BH1-alr-c-02-0-UI.s1 Mus musculus cDNA, 3' end /clone=UI-M-BH1-alr-c-02-0-UI /clone_end=3' /gb=AW047047 /gi=5907576 /ug=Mm.6932 /len=334 /STRA=for			533.75	518.5	0.971429	0.871322		0.794379	0.983607
92633_at	279	251	140	137		138	89	132	213	286	318	224	238		Mus musculus mRNA for cathepsin Z precursor (ctsZ gene) /cds=(104,1024) /gb=AJ242663 /gi=5019547 /ug=Mm.115 /len=1291 /STRA=for			201.75	196	0.971499	0.919654		1.17968	1.11029
95090_at	533	576	558	530		590	579	523	573	503	434	549	744		vu18f09.r1 Mus musculus cDNA, 5' end /clone=IMAGE-1181033 /clone_end=5' /gb=AA688600 /gi=2678029 /ug=Mm.29269 /len=362 /STRA=rev			549.25	533.667	0.971628	0.635316		1.35457	0.999545
95978_at	300	228	172	230		126	131	266	210	303	320	131	143		vc49a08.r1 Mus musculus cDNA, 3' end /clone=IMAGE-777878 /clone_end=3' /gb=AA414964 /gi=2075091 /ug=Mm.25017 /len=230 /STRA=rev			232.5	226	0.972043	0.895218		0.615054	0.563441
101362_at	50	84	51	66		50	56	76	52	80	52	52	71		Mus musculus mRNA for JNK2, complete cds /cds=(47,1192) /gb=AB005664 /gi=6141552 /ug=Mm.68933 /len=1220 /STRA=for			62.75	61	0.972112	0.855261		1.13147	0.828685
104063_at	50	81	50	72		50	50	50	60	68	91	76	73		UI-M-AO0-acc-a-09-0-UI.s1 Mus musculus cDNA, 3' end /clone=UI-M-AO0-acc-a-09-0-UI /clone_end=3' /gb=AI840130 /gi=5474343 /ug=Mm.21586 /len=421 /STRA=for			63.25	61.5	0.972332	0.869851		1.15415	1.20158
92665_f_at	264	201	182	112		108	132	208	208	239	212	152	139		Mouse mRNA for pM1 protein, member of XLR family expressed in lymphoid cells /cds=(66,692) /gb=X07967 /gi=55447 /ug=Mm.4455 /len=945 /STRA=for			189.75	184.5	0.972332	0.888329		0.732543	0.801054
96375_at	94	83	109	113		137	91	71	98	55	130	137	112		C80249 Mus musculus cDNA, 3' end /clone=J0078F09 /clone_end=3' /gb=C80249 /gi=2520579 /ug=Mm.25065 /len=609 /STRA=rev			99.75	97	0.972431	0.877581		1.12281	1.37343
96352_at	435	526	267	346		321	326	365	365	411	508	324	356		UI-M-AJ1-ahb-d-02-0-UI.s1 Mus musculus cDNA, 3' end /clone=UI-M-AJ1-ahb-d-02-0-UI /clone_end=3' /gb=AI848845 /gi=5492751 /ug=Mm.30003 /len=402 /STRA=for			393.5	382.667	0.972469	0.853189		0.904701	0.82338
94430_at	63	50	50	68		57	59	68	50	50	53	75	64		UI-M-BH0-ajv-a-07-0-UI.s1 Mus musculus cDNA, 3' end /clone=UI-M-BH0-ajv-a-07-0-UI /clone_end=3' /gb=AI850991 /gi=5494897 /ug=Mm.26484 /len=364 /STRA=for			57.75	56.1667	0.972583	0.761411		1.10823	1.2987
100529_at	73	50	60	50		50	50	50	50	90	50	50	78		Ubiquitin-conjugating enzyme E2H /cds=(164,715) /gb=U19854 /gi=897846 /ug=Mm.5203 /len=2655 /STRA=for			58.25	56.6667	0.972818	0.870174		1.33906	0.858369
102984_g_at	497	646	344	529		356	288	527	516	571	685	502	302		MAD homolog 1 (Drosophila) /cds=(70,1467) /gb=U58992 /gi=1518644 /ug=Mm.15185 /len=1639 /STRA=for			504	490.5	0.973214	0.883093		0.599206	0.996032
96602_g_at	50	117	50	57		64	69	88	50	50	79	65	71		UI-M-BH1-akt-a-08-0-UI.s1 Mus musculus cDNA, 3' end /clone=UI-M-BH1-akt-a-08-0-UI /clone_end=3' /gb=AW045751 /gi=5906280 /ug=Mm.27035 /len=260 /STRA=for			68.5	66.6667	0.973236	0.906		1.0365	0.948905
94281_at	224	405	265	332		219	171	338	352	385	325	333	139		UI-M-BH2.1-apz-c-01-0-UI.s1 Mus musculus cDNA, 3' end /clone=UI-M-BH2.1-apz-c-01-0-UI /clone_end=3' /gb=AW125138 /gi=6100668 /ug=Mm.22533 /len=352 /STRA=for			306.5	298.333	0.973355	0.8815		0.453507	1.08646
103282_at	50	50	63	50		53	58	50	50	50	50	50	50		Mus musculus calcium- and diacylglycerol-regulated guanine nucleotide exchange factor I (CalDAG-GEFI) mRNA, complete cds /cds=(165,1991) /gb=U78171 /gi=4225849 /ug=Mm.20884 /len=2250 /STRA=for			53.25	51.8333	0.973396	0.655549		0.938967	0.938967
99961_s_at	50	103	50	73		50	50	101	86	57	59	52	50		Mus musculus cyclin-dependent kinase homologue (p130PITSL) mRNA, complete cds /cds=(661,3012) /gb=L37092 /gi=561745 /ug=Mm.4414 /len=3161 /STRA=for			69	67.1667	0.97343	0.90387		0.724638	0.753623
99513_at	572	1063	620	549		387	343	714	621	1136	894	391	489		Mouse calcium-dependent phospholipid binding protein (PLA2) mRNA, complete cds /cds=(108,2354) /gb=M72394 /gi=200390 /ug=Mm.4186 /len=2787 /STRA=for			701	682.5	0.973609	0.921483		0.697575	0.557775
104410_at	130	507	359	365		242	212	408	376	390	360	194	279		UI-M-BH2.1-aqa-h-06-0-UI.s1 Mus musculus cDNA, 3' end /clone=UI-M-BH2.1-aqa-h-06-0-UI /clone_end=3' /gb=AW124785 /gi=6100315 /ug=Mm.2883 /len=417 /STRA=for			340.25	331.333	0.973794	0.908011		0.819985	0.570169
93913_at	50	87	100	60		60	51	74	75	66	108	50	50		uc86e07.x1 Mus musculus cDNA, 3' end /clone=IMAGE-1432548 /clone_end=3' /gb=AI043090 /gi=3286350 /ug=Mm.89587 /len=507 /STRA=for			74.25	72.3333	0.974186	0.89133		0.673401	0.673401
97986_at	231	254	50	50		116	365	50	50	224	50	50	50		CD39 antigen-like 1 /cds=(66,464) /gb=U91511 /gi=2522325 /ug=Mm.31308 /len=1790 /STRA=for			146.25	142.5	0.974359	0.963306		0.34188	0.34188
102827_at	814	1381	721	888		646	594	1137	1003	1124	1056	642	592		UI-M-BH2.1-apw-c-02-0-UI.s1 Mus musculus cDNA, 3' end /clone=UI-M-BH2.1-apw-c-02-0-UI /clone_end=3' /gb=AW124633 /gi=6100163 /ug=Mm.14478 /len=421 /STRA=for			951	926.667	0.974413	0.889803		0.622503	0.675079
100631_r_at	50	123	156	50		165	105	68	50	106	60	50	50		mw26g09.r1 Mus musculus cDNA, 5' end /clone=IMAGE-671872 /clone_end=5' /gb=AA241764 /gi=1872796 /ug=Mm.667 /len=240 /STRA=for			94.75	92.3333	0.974494	0.938362		0.527704	0.527704
101678_r_at	121	585	314	223		411	211	219	168	236	572	229	193		mu60b12.x1 Mus musculus cDNA, 3' end /clone=IMAGE-643775 /clone_end=3' /gb=AI451701 /gi=4305839 /ug=Mm.32520 /len=256 /STRA=rev			310.75	302.833	0.974524	0.945423		0.621078	0.736927
92564_at	114	168	111	79		76	68	117	130	132	167	58	70		ul59a06.x1 Mus musculus cDNA, 3' end /clone=IMAGE-2123314 /clone_end=3' /gb=AI891475 /gi=5597377 /ug=Mm.10272 /len=493 /STRA=for			118	115	0.974576	0.903516		0.59322	0.491525
98418_at	269	415	259	379		271	248	275	308	407	424	273	257		Dishevelled, dsh homolog (Drosophila) /cds=(262,2349) /gb=U10115 /gi=497689 /ug=Mm.3400 /len=3286 /STRA=for			330.5	322.167	0.974786	0.869735		0.77761	0.826021
93749_at	326	493	460	335		202	254	357	426	546	575	131	744		UI-M-AH1-agp-g-05-0-UI.s1 Mus musculus cDNA, 3' end /clone=UI-M-AH1-agp-g-05-0-UI /clone_end=3' /gb=AI848045 /gi=5491951 /ug=Mm.21108 /len=224 /STRA=for			403.5	393.333	0.974804	0.907041		1.84387	0.324659
102991_s_at	129	128	59	56		50	90	111	118	95	80	100	50		Mus musculus major histocompatibility locus class II region; Fas-binding protein Daxx (DAXX) gene, partial cds; Bing1 (BING1), tapasin (tapasin), RalGDS-like factor (RLF), KE2 (KE2), BING4 (BING4), beta1, 3-galactosyl transferase (be /STRA=for			93	90.6667	0.97491	0.911773		0.537634	1.07527
102770_at	192	254	177	201		239	150	202	248	246	120	122	233		Glycophorin A /cds=UNKNOWN /gb=M26385 /gi=193557 /ug=Mm.13123 /len=2031 /STRA=for			206	200.833	0.974919	0.870919		1.13107	0.592233
101617_s_at	50	79	50	50		50	50	50	85	50	50	75	50		Mus musculus p53-variant (p53) mRNA, partial cds /cds=(0,161) /gb=U59758 /gi=1399879 /ug=Mm.6186 /len=846 /STRA=for			57.25	55.8333	0.975255	0.882381		0.873362	1.31004
94375_at	203	455	312	311		309	123	200	273	360	609	252	240		M.musculus gene encoding hexokinase II, exon 1 (and joined CDS) /cds=(479,3232) /gb=Y11666 /gi=1907082 /ug=Mm.2549 /len=5496 /STRA=for			320.25	312.333	0.97528	0.935464		0.749415	0.786885
92234_at	173	116	210	138		112	113	117	98	352	140	169	198		M.musculus mRNA for retinoid X receptor-alpha (mRXR-alpha) /cds=(177,1580) /gb=X66223 /gi=54021 /ug=Mm.3470 /len=2088 /STRA=for			159.25	155.333	0.975406	0.942092		1.24333	1.06122
101662_at	50	50	50	55		50	50	50	50	50	50	50	50		vj86g06.r1 Mus musculus cDNA, 3' end /clone=IMAGE-944026 /clone_end=3' /gb=AA536986 /gi=2282979 /ug=Mm.6902 /len=498 /STRA=rev			51.25	50	0.97561	0.241504		0.97561	0.97561
104184_at	50	55	50	50		50	50	50	50	50	50	50	50		Natriuretic peptide precursor type B /cds=(78,443) /gb=D16497 /gi=493659 /ug=Mm.2740 /len=668 /STRA=for			51.25	50	0.97561	0.241504		0.97561	0.97561
93464_at	50	50	55	50		50	50	50	50	50	50	50	50		vw82e12.x1 Mus musculus cDNA, 3' end /clone=IMAGE-1261486 /clone_end=3' /gb=AI561567 /gi=4512912 /ug=Mm.6910 /len=256 /STRA=for			51.25	50	0.97561	0.241504		0.97561	0.97561
94116_at	50	55	50	50		50	50	50	50	50	50	50	50		Bombesin-like receptor 3 /cds=(0,1199) /gb=AB010280 /gi=2789471 /ug=Mm.10687 /len=1200 /STRA=for			51.25	50	0.97561	0.241504		0.97561	0.97561
94235_at	50	55	50	50		50	50	50	50	50	50	50	50		UI-M-BH1-amm-b-10-0-UI.s1 Mus musculus cDNA, 3' end /clone=UI-M-BH1-amm-b-10-0-UI /clone_end=3' /gb=AW050034 /gi=5910563 /ug=Mm.22327 /len=531 /STRA=for			51.25	50	0.97561	0.241504		0.97561	0.97561
96136_at	50	55	50	50		50	50	50	50	50	50	50	50		vw55f10.x1 Mus musculus cDNA, 3' end /clone=IMAGE-1247755 /clone_end=3' /gb=AI553452 /gi=4485815 /ug=Mm.28159 /len=394 /STRA=for			51.25	50	0.97561	0.241504		0.97561	0.97561
98029_at	55	50	50	50		50	50	50	50	50	50	50	50		UI-M-BH1-anj-g-03-0-UI.s1 Mus musculus cDNA, 3' end /clone=UI-M-BH1-anj-g-03-0-UI /clone_end=3' /gb=AW060459 /gi=6008210 /ug=Mm.3285 /len=438 /STRA=for			51.25	50	0.97561	0.241504		0.97561	0.97561
95068_at	71	186	133	134		125	99	193	139	86	125	97	119		vv44b12.r1 Mus musculus cDNA, 5' end /clone=IMAGE-1225247 /clone_end=5' /gb=AA763945 /gi=2811467 /ug=Mm.29186 /len=437 /STRA=for			131	127.833	0.975827	0.908246		0.908397	0.740458
103449_at	405	376	287	256		236	165	359	306	422	450	454	204		vu05f10.r1 Mus musculus cDNA, 5' end /clone=IMAGE-1179787 /clone_end=5' /gb=AA795923 /gi=2858878 /ug=Mm.21577 /len=558 /STRA=for			331	323	0.975831	0.90138		0.616314	1.3716
94419_at	50	87	50	50		50	50	85	50	62	50	84	50		Solute carrier family 19 (sodium/hydrogen exchanger), member 1 /cds=(41,1579) /gb=L23755 /gi=454830 /ug=Mm.2620 /len=1969 /STRA=for			59.25	57.8333	0.97609	0.89376		0.843882	1.41772
97308_at	74	153	110	96		62	67	131	142	135	97	105	89		UI-M-AQ0-aaj-d-08-0-UI.s1 Mus musculus cDNA, 3' end /clone=UI-M-AQ0-aaj-d-08-0-UI /clone_end=3' /gb=AI835409 /gi=5469622 /ug=Mm.28063 /len=314 /STRA=for			108.25	105.667	0.976135	0.911002		0.822171	0.969977
93340_f_at	402	601	274	198		135	134	582	414	422	473	362	183		Mus musculus beta prime coatomer protein mRNA, partial cds /cds=(0,1352) /gb=AF043120 /gi=2809536 /ug=Mm.18729 /len=1615 /STRA=for			368.75	360	0.976271	0.942316		0.496271	0.981695
92744_at	64	96	102	50		50	50	80	113	114	50	50	50		UI-M-BH0-aka-d-01-0-UI.s1 Mus musculus cDNA, 3' end /clone=UI-M-BH0-aka-d-01-0-UI /clone_end=3' /gb=AI854774 /gi=5498680 /ug=Mm.4692 /len=272 /STRA=rev			78	76.1667	0.976496	0.924441		0.641026	0.641026
94301_at	591	651	489	511		346	350	726	710	507	645	282	565		UI-M-AO1-aei-c-08-0-UI.s1 Mus musculus cDNA, 3' end /clone=UI-M-AO1-aei-c-08-0-UI /clone_end=3' /gb=AI843269 /gi=5477482 /ug=Mm.22602 /len=310 /STRA=for			560.5	547.333	0.976509	0.890799		1.00803	0.503122
96884_at	472	649	345	509		499	308	419	442	705	520	325	302		UI-M-AP1-agg-e-12-0-UI.s1 Mus musculus cDNA, 3' end /clone=UI-M-AP1-agg-e-12-0-UI /clone_end=3' /gb=AI847631 /gi=5491537 /ug=Mm.30081 /len=334 /STRA=for			493.75	482.167	0.97654	0.893246		0.611646	0.658228
101416_f_at	314	420	336	300		350	356	399	364	338	200	313	274		Mus musculus Bat-4 gene, complete cds /cds=(40,1158) /gb=L76155 /gi=1196643 /ug=Mm.7405 /len=1400 /STRA=for			342.5	334.5	0.976642	0.850679		0.8	0.913869
100323_at	345	1122	570	420		287	329	780	562	615	1027	459	251		S-adenosylmethionine decarboxylase 3 /cds=(0,1004) /gb=Z23077 /gi=396140 /ug=Mm.87749 /len=1005 /STRA=for			614.25	600	0.976801	0.944579		0.408628	0.747253
94920_at	110	138	131	139		159	131	102	150	118	99	135	96		UI-M-BH0-ajm-c-01-0-UI.s1 Mus musculus cDNA, 3' end /clone=UI-M-BH0-ajm-c-01-0-UI /clone_end=3' /gb=AI854028 /gi=5497934 /ug=Mm.24187 /len=439 /STRA=for			129.5	126.5	0.976834	0.832124		0.741313	1.04247
95600_at	61	84	50	50		50	50	50	63	50	96	50	50		Mus musculus mRNA for Ariadne-2 protein /cds=(164,1642) /gb=AJ130975 /gi=3925716 /ug=Mm.27934 /len=2054 /STRA=for			61.25	59.8333	0.976871	0.903791		0.816327	0.816327
95707_at	779	674	700	647		435	481	892	989	659	647	512	643		vo94f04.r1 Mus musculus cDNA, 5' end /clone=IMAGE-1066783 /clone_end=5' /gb=AA615853 /gi=2503081 /ug=Mm.29700 /len=534 /STRA=for			700	683.833	0.976905	0.891101		0.918571	0.731429
99459_f_at	50	67	50	50		50	50	57	61	50	50	50	50		ELKL motif kinase /cds=(93,2417) /gb=X70764 /gi=57919 /ug=Mm.4082 /len=2763 /STRA=for			54.25	53	0.976959	0.771631		0.921659	0.921659
95520_at	89	143	68	50		65	61	75	89	136	87	63	50		UI-M-AK1-aeu-a-10-0-UI.s1 Mus musculus cDNA, 3' end /clone=UI-M-AK1-aeu-a-10-0-UI /clone_end=3' /gb=AI843845 /gi=5478058 /ug=Mm.25320 /len=404 /STRA=for			87.5	85.5	0.977143	0.926886		0.571429	0.72
96717_at	193	246	138	202		99	124	268	244	215	192	229	145		UI-M-BH2.2-aol-d-12-0-UI.s1 Mus musculus cDNA, 3' end /clone=UI-M-BH2.2-aol-d-12-0-UI /clone_end=3' /gb=AW122643 /gi=6098172 /ug=Mm.27649 /len=315 /STRA=for			194.75	190.333	0.977321	0.911041		0.744544	1.17587
93391_at	50	56	50	50		50	50	52	50	50	50	50	103		Crystallin, gamma S /cds=(51,587) /gb=AF032995 /gi=2642336 /ug=Mm.6253 /len=702 /STRA=for			51.5	50.3333	0.977346	0.380461		2	0.970874
99000_at	50	58	50	50		50	50	55	50	50	50	50	50		Mus musculus mRNA for ERK5, complete cds /cds=(213,2633) /gb=AB019373 /gi=5360520 /ug=Mm.38172 /len=2945 /STRA=for			52	50.8333	0.977564	0.554908		0.961538	0.961538
102678_at	50	92	50	50		50	50	68	78	50	59	50	50		Mus musculus Ro protein mRNA, complete cds /cds=(140,1552) /gb=L27990 /gi=625145 /ug=Mm.1384 /len=1840 /STRA=for			60.5	59.1667	0.977961	0.899481		0.826446	0.826446
92755_f_at	601	615	615	561		669	560	580	459	845	396	476	821		M.musculus mRNA for secretin /cds=(8,409) /gb=X73580 /gi=313710 /ug=Mm.4723 /len=490 /STRA=for			598	584.833	0.977982	0.876298		1.37291	0.795987
99618_at	309	539	544	483		318	372	530	665	451	415	518	601		UI-M-BH0-ajd-e-03-0-UI.s1 Mus musculus cDNA, 3' end /clone=UI-M-BH0-ajd-e-03-0-UI /clone_end=3' /gb=AI853523 /gi=5497429 /ug=Mm.43162 /len=425 /STRA=for			468.75	458.5	0.978133	0.897123		1.28213	1.10507
94290_at	153	388	321	231		151	279	340	404	235	195	155	236		UI-M-BH2.1-apq-g-05-0-UI.s1 Mus musculus cDNA, 3' end /clone=UI-M-BH2.1-apq-g-05-0-UI /clone_end=3' /gb=AW124346 /gi=6099876 /ug=Mm.22577 /len=235 /STRA=for			273.25	267.333	0.978347	0.927197		0.863678	0.567246
93066_at	406	454	241	289		105	175	408	453	397	502	276	587		Granulin /cds=(0,1769) /gb=D16195 /gi=286067 /ug=Mm.1568 /len=1770 /STRA=for			347.5	340	0.978417	0.936313		1.68921	0.794245
94323_at	1637	2529	1204	1899		1293	1580	1901	1995	2032	1868	1840	1238		UI-M-BH1-alq-f-07-0-UI.s1 Mus musculus cDNA, 3' end /clone=UI-M-BH1-alq-f-07-0-UI /clone_end=3' /gb=AW048132 /gi=5908661 /ug=Mm.22667 /len=271 /STRA=for			1817.25	1778.17	0.978493	0.885673		0.681249	1.01252
94117_f_at	68	82	106	54		90	123	70	64	58	50	85	105		Putative neuronal cell adhesion molecule /cds=(226,2607) /gb=AF026465 /gi=3068591 /ug=Mm.10689 /len=3146 /STRA=for			77.5	75.8333	0.978495	0.920754		1.35484	1.09677
103236_at	50	50	50	57		50	50	50	54	50	50	50	50		Mus musculus mRNA for transcription repressor Ring1A /cds=(6,1139) /gb=Y12881 /gi=2239143 /ug=Mm.20343 /len=1312 /STRA=rev			51.75	50.6667	0.979066	0.521265		0.966184	0.966184
99185_at	151	208	128	150		124	61	164	223	200	164	111	127		UI-M-BH1-alr-a-02-0-UI.s1 Mus musculus cDNA, 3' end /clone=UI-M-BH1-alr-a-02-0-UI /clone_end=3' /gb=AW047026 /gi=5907555 /ug=Mm.41874 /len=257 /STRA=for			159.25	156	0.979592	0.922478		0.797488	0.697017
95109_at	980	1692	1089	844		494	514	1315	1555	1456	1433	959	535		UI-M-BH2.2-aon-d-07-0-UI.s1 Mus musculus cDNA, 3' end /clone=UI-M-BH2.2-aon-d-07-0-UI /clone_end=3' /gb=AW121447 /gi=6096780 /ug=Mm.29363 /len=278 /STRA=for			1151.25	1127.83	0.97966	0.937668		0.464712	0.833008
92771_at	836	963	675	724		509	503	1014	1055	850	770	569	442		Mus musculus mRNA for 49 kDa zinc finger protein, complete cds /cds=(110,1492) /gb=AB013357 /gi=4153885 /ug=Mm.12236 /len=2082 /STRA=for			799.5	783.5	0.979987	0.90654		0.552846	0.711695
101600_at	50	65	50	52		50	54	50	50	50	65	50	51		C79015 Mus musculus cDNA, 3' end /clone=J0059B03 /clone_end=3' /gb=C79015 /gi=2519345 /ug=Mm.5780 /len=610 /STRA=rev			54.25	53.1667	0.980031	0.802653		0.940092	0.921659
96626_at	424	556	266	379		234	304	546	565	390	350	336	270		UI-M-AQ1-adz-h-01-0-UI.s1 Mus musculus cDNA, 3' end /clone=UI-M-AQ1-adz-h-01-0-UI /clone_end=3' /gb=AI843401 /gi=5477614 /ug=Mm.27182 /len=336 /STRA=for			406.25	398.167	0.980103	0.924464		0.664615	0.827077
103908_at	61	183	106	71		50	50	97	81	146	195	101	50		UI-M-BH2.3-aoi-b-10-0-UI.s1 Mus musculus cDNA, 3' end /clone=UI-M-BH2.3-aoi-b-10-0-UI /clone_end=3' /gb=AW121857 /gi=6097231 /ug=Mm.21406 /len=324 /STRA=for			105.25	103.167	0.980206	0.955925		0.475059	0.95962
103012_at	50	54	50	50		50	50	50	50	50	50	50	50		Mus musculus beta chemokine TCA4 gene, complete cds /cds=(0,401) /gb=AF035684 /gi=3947923 /ug=Mm.15780 /len=402 /STRA=for			51	50	0.980392	0.241504		0.980392	0.980392
104342_i_at	50	54	50	50		50	50	50	50	50	50	50	50		UI-M-AQ1-aeb-h-07-0-UI.s1 Mus musculus cDNA, 3' end /clone=UI-M-AQ1-aeb-h-07-0-UI /clone_end=3' /gb=AI845798 /gi=5489704 /ug=Mm.22526 /len=184 /STRA=for			51	50	0.980392	0.241504		0.980392	0.980392
100417_at	92	82	50	50		50	60	97	72	74	50	55	50		vu61f01.x1 Mus musculus cDNA, 3' end /clone=IMAGE-1195897 /clone_end=3' /gb=AI643885 /gi=4722360 /ug=Mm.46749 /len=498 /STRA=for			68.5	67.1667	0.980535	0.917949		0.729927	0.80292
100353_g_at	570	837	364	450		278	285	724	724	690	566	386	280		vy50h03.r1 Mus musculus cDNA, 5' end /clone=IMAGE-1298933 /clone_end=5' /gb=AA919208 /gi=3065987 /ug=Mm.88724 /len=501 /STRA=for			555.25	544.5	0.980639	0.938642		0.504277	0.695182
98024_at	211	373	228	226		159	62	346	330	326	304	139	72		Nuclear transcription factor-Y beta /cds=(209,832) /gb=X55316 /gi=53362 /ug=Mm.3259 /len=1234 /STRA=for			259.5	254.5	0.980732	0.941998		0.277457	0.535645
101022_at	50	50	50	58		50	50	50	50	50	56	50	50		ua02f08.r1 Mus musculus cDNA, 5' end /clone=IMAGE-1345575 /clone_end=5' /gb=AI154281 /gi=3682750 /ug=Mm.6840 /len=301 /STRA=for			52	51	0.980769	0.633139		0.961538	0.961538
92597_s_at	83	150	68	98		55	100	102	134	93	103	79	97		Mus musculus vacuolar adenosine triphosphatase subunit B gene, complete cds /cds=(0,1535) /gb=U13838 /gi=1184660 /ug=Mm.10727 /len=1536 /STRA=for			99.75	97.8333	0.980785	0.922686		0.972431	0.79198
94699_at	58	60	50	76		50	50	50	50	74	85	79	50		IAP promoted placental gene /cds=(142,750) /gb=X58523 /gi=52733 /ug=Mm.1350 /len=1068 /STRA=for			61	59.8333	0.980874	0.900743		0.819672	1.29508
104392_at	231	311	242	194		179	298	230	222	253	257	250	328		ud15c04.r1 Mus musculus cDNA, 5' end /clone=IMAGE-1445958 /clone_end=5' /gb=AI122121 /gi=3522445 /ug=Mm.22727 /len=498 /STRA=for			244.5	239.833	0.980913	0.872083		1.34151	1.02249
95654_at	1474	1999	1394	1250		1084	1203	1803	1685	1581	1646	845	963		Mus musculus major histocompatibility locus class III regions Hsc70t gene, partial cds; smRNP, G7A, NG23, MutS homolog, CLCP, NG24, NG25, and NG26 genes, complete cds; and unknown genes /cds=(0,725) /gb=AF109905 /gi=3986751 /ug=Mm.29 /STRA=for			1529.25	1500.33	0.981091	0.886176		0.62972	0.552558
100473_at	50	50	58	54		50	50	50	53	59	50	52	50		UI-M-BH0-aim-c-02-0-UI.s1 Mus musculus cDNA, 3' end /clone=UI-M-BH0-aim-c-02-0-UI /clone_end=3' /gb=AI851750 /gi=5495656 /ug=Mm.495 /len=254 /STRA=for			53	52	0.981132	0.687091		0.943396	0.981132
98456_at	50	50	83	65		52	56	50	107	50	50	50	65		Mus musculus major histocompatibility locus class III region- complement C4 (C4) and cytochrome P450 hydroxylase A (CYP21OH-A) genes, complete cds; slp pseudogene, complete sequence; NG6, SKI, and complement factor B (Bf) genes, comp /STRA=for			62	60.8333	0.981183	0.931513		1.04839	0.806452
92554_at	256	297	165	187		109	131	308	232	305	247	231	84		Mus musculus C-terminal binding protein 2 CtBP2 mRNA, complete cds /cds=(0,1337) /gb=AF059735 /gi=3513570 /ug=Mm.10172 /len=1338 /STRA=rev			226.25	222	0.981215	0.933827		0.371271	1.02099
102028_at	67	124	73	75		67	60	81	102	91	98	78	100		Mus musculus putative ras effector Nore1 mRNA, complete cds /cds=(30,1271) /gb=AF053959 /gi=2997697 /ug=Mm.10133 /len=3018 /STRA=for			84.75	83.1667	0.981318	0.909889		1.17994	0.920354
100424_at	109	220	219	204		151	258	85	124	225	264	50	150		Excision repair 1 /cds=(98,994) /gb=X07414 /gi=50854 /ug=Mm.4700 /len=1053 /STRA=for			188	184.5	0.981383	0.938015		0.797872	0.265957
101894_s_at	50	106	50	65		50	50	50	68	100	81	50	50		Fused toes /cds=(213,1091) /gb=X71978 /gi=311631 /ug=Mm.88777 /len=1793 /STRA=for			67.75	66.5	0.98155	0.935125		0.738007	0.738007
104253_at	228	192	195	185		132	202	188	207	243	206	217	204		vt07h02.r1 Mus musculus cDNA, 5' end /clone=IMAGE-1162419 /clone_end=5' /gb=AA692074 /gi=2693012 /ug=Mm.28364 /len=448 /STRA=for			200	196.333	0.981667	0.859489		1.02	1.085
99981_at	50	68	50	58		50	60	57	53	52	61	50	50		Guanine nucleotide binding protein, alpha q polypeptide /cds=(36,1115) /gb=M55412 /gi=193501 /ug=Mm.4446 /len=1460 /STRA=for			56.5	55.5	0.982301	0.812805		0.884956	0.884956
96207_at	572	1014	712	466		443	258	788	703	959	922	548	427		UI-M-BH1-akp-e-11-0-UI.s1 Mus musculus cDNA, 3' end /clone=UI-M-BH1-akp-e-11-0-UI /clone_end=3' /gb=AW046449 /gi=5906978 /ug=Mm.28645 /len=373 /STRA=for			691	678.833	0.982393	0.944578		0.617945	0.793054
104403_at	282	345	227	263		218	127	338	290	259	414	214	191		UI-M-BH0-ajw-d-12-0-UI.s1 Mus musculus cDNA, 3' end /clone=UI-M-BH0-ajw-d-12-0-UI /clone_end=3' /gb=AI854118 /gi=5498024 /ug=Mm.28691 /len=504 /STRA=rev			279.25	274.333	0.982393	0.929853		0.683975	0.766338
98432_at	50	59	50	50		50	58	50	50	50	50	50	50		M.musculus mRNA for paladin gene /cds=(46,2625) /gb=X99384 /gi=1545958 /ug=Mm.3437 /len=4055 /STRA=for			52.25	51.3333	0.982456	0.716653		0.956938	0.956938
95042_at	547	761	525	512		427	335	780	650	572	692	291	414		UI-M-AN0-acq-f-01-0-UI.s1 Mus musculus cDNA, 3' end /clone=UI-M-AN0-acq-f-01-0-UI /clone_end=3' /gb=AI839770 /gi=5474023 /ug=Mm.29118 /len=148 /STRA=for			586.25	576	0.982516	0.918789		0.706183	0.496375
93843_at	414	405	398	501		319	380	479	497	476	381	522	550		UI-M-AQ1-adx-c-01-0-UI.s1 Mus musculus cDNA, 3' end /clone=UI-M-AQ1-adx-c-01-0-UI /clone_end=3' /gb=AI845580 /gi=5489486 /ug=Mm.21623 /len=245 /STRA=for			429.5	422	0.982538	0.860499		1.28056	1.21537
96978_at	56	76	50	50		50	62	50	74	50	56	72	78		Mus musculus mRNA for granuphilin-a, complete cds /cds=(185,2206) /gb=AB025258 /gi=5926735 /ug=Mm.88816 /len=3741 /STRA=for			58	57	0.982759	0.888588		1.34483	1.24138
94469_at	510	491	297	359		209	293	571	617	379	374	328	209		UI-M-BH2.3-aod-b-02-0-UI.s1 Mus musculus cDNA, 3' end /clone=UI-M-BH2.3-aod-b-02-0-UI /clone_end=3' /gb=AW120950 /gi=6096283 /ug=Mm.28848 /len=336 /STRA=for			414.25	407.167	0.982901	0.939474		0.504526	0.791792
92603_at	385	608	213	324		219	261	406	427	371	572	280	605		Mus musculus vacuolar adenosine triphosphatase subunit D mRNA, complete cds /cds=(17,1072) /gb=U13840 /gi=3955099 /ug=Mm.1081 /len=1509 /STRA=for			382.5	376	0.983007	0.945462		1.5817	0.732026
104151_at	341	363	399	370		329	420	312	387	387	337	379	394		vw55f08.x1 Mus musculus cDNA, 3' end /clone=IMAGE-1247751 /clone_end=3' /gb=AI553451 /gi=4485814 /ug=Mm.22189 /len=316 /STRA=for			368.25	362	0.983028	0.796469		1.06993	1.02919
104413_at	220	291	270	163		198	115	280	233	241	325	122	113		UI-M-AM1-afw-d-12-0-UI.s1 Mus musculus cDNA, 3' end /clone=UI-M-AM1-afw-d-12-0-UI /clone_end=3' /gb=AI834976 /gi=5469189 /ug=Mm.28885 /len=434 /STRA=for			236	232	0.983051	0.928318		0.478814	0.516949
101875_at	414	400	388	401		277	348	543	470	372	354	328	372		M.musculus tex271 mRNA /cds=(55,477) /gb=X81059 /gi=531529 /ug=Mm.88062 /len=959 /STRA=for			400.75	394	0.983157	0.893959		0.92826	0.818465
100876_at	528	460	361	435		247	321	420	339	818	486	205	279		UI-M-AH0-acz-a-07-0-UI.s1 Mus musculus cDNA, 3' end /clone=UI-M-AH0-acz-a-07-0-UI /clone_end=3' /gb=AI841076 /gi=5475289 /ug=Mm.5264 /len=424 /STRA=for			446	438.5	0.983184	0.946016		0.625561	0.459641
94238_at	387	616	456	464		386	242	458	342	750	658	116	304		up21f09.y1 Mus musculus cDNA, 5' end /clone=IMAGE-2655017 /clone_end=5' /gb=AW228316 /gi=6557612 /ug=Mm.22345 /len=193 /STRA=for			480.75	472.667	0.983186	0.941292		0.632345	0.24129
103459_at	340	422	282	247		255	169	386	352	313	429	284	126		UI-M-BH2.1-apo-h-11-0-UI.s1 Mus musculus cDNA, 3' end /clone=UI-M-BH2.1-apo-h-11-0-UI /clone_end=3' /gb=AW124544 /gi=6100074 /ug=Mm.21688 /len=256 /STRA=for			322.75	317.333	0.983217	0.92631		0.390395	0.879938
101579_at	50	96	84	50		50	71	85	92	65	50	50	50		M. musculus (SRP9) signal recognition particle subunit mRNA, 689bp /cds=(93,353) /gb=X78304 /gi=872130 /ug=Mm.89927 /len=689 /STRA=for			70	68.8333	0.983333	0.930202		0.714286	0.714286
93038_f_at	2319	3917	2290	2135		1753	1593	3202	2837	3103	3237	1795	1920		Lipocortin 1 /cds=(14,1054) /gb=M69260 /gi=198844 /ug=Mm.14860 /len=1340 /STRA=for			2665.25	2620.83	0.983335	0.932203		0.720383	0.673483
94002_at	454	652	350	308		212	272	479	501	568	570	379	246		UI-M-AL1-aho-d-08-0-UI.s1 Mus musculus cDNA, 3' end /clone=UI-M-AL1-aho-d-08-0-UI /clone_end=3' /gb=AI849838 /gi=5493737 /ug=Mm.21771 /len=417 /STRA=for			441	433.667	0.983371	0.942917		0.557823	0.85941
101150_at	50	50	71	50		50	50	50	50	76	50	50	50		Mus musculus ets-related protein 71 (ER71) mRNA, complete cds /cds=(22,1029) /gb=L10427 /gi=193197 /ug=Mm.4829 /len=1046 /STRA=for			55.25	54.3333	0.983409	0.89646		0.904977	0.904977
96874_g_at	1188	1574	950	1000		621	500	1494	1535	1460	1346	1129	746		UI-M-AO1-aei-e-06-0-UI.s1 Mus musculus cDNA, 3' end /clone=UI-M-AO1-aei-e-06-0-UI /clone_end=3' /gb=AI843287 /gi=5477500 /ug=Mm.30069 /len=425 /STRA=for			1178	1159.33	0.984154	0.945474		0.633277	0.958404
102335_at	75	199	135	141		119	86	104	156	221	126	102	174		Potassium channel, subfamily K, member 1 /cds=(290,1300) /gb=AF033017 /gi=3150442 /ug=Mm.10800 /len=2240 /STRA=for			137.5	135.333	0.984242	0.947115		1.26545	0.741818
94812_at	111	524	156	166		114	50	322	444	165	318	72	71		vm68b10.s1 Mus musculus cDNA, 5' end /clone=IMAGE-1003387 /clone_end=5' /gb=AA684175 /gi=2670761 /ug=Mm.22700 /len=513 /STRA=for			239.25	235.5	0.984326	0.973018		0.296761	0.30094
100039_at	167	240	157	166		50	59	282	251	223	213	107	154		UI-M-BH2.2-aqk-g-03-0-UI.s1 Mus musculus cDNA, 3' end /clone=UI-M-BH2.2-aqk-g-03-0-UI /clone_end=3' /gb=AW125880 /gi=6101410 /ug=Mm.44220 /len=490 /STRA=for			182.5	179.667	0.984475	0.958852		0.843836	0.586301
102859_at	50	66	50	50		50	50	50	50	69	50	50	50		UI-M-BH2.3-aog-g-02-0-UI.s1 Mus musculus cDNA, 3' end /clone=UI-M-BH2.3-aog-g-02-0-UI /clone_end=3' /gb=AW121304 /gi=6096637 /ug=Mm.14992 /len=261 /STRA=for			54	53.1667	0.984568	0.873431		0.925926	0.925926
95629_at	297	560	264	348		202	214	534	508	408	304	269	341		UI-M-AK1-aer-c-01-0-UI.s1 Mus musculus cDNA, 3' end /clone=UI-M-AK1-aer-c-01-0-UI /clone_end=3' /gb=AI843679 /gi=5477892 /ug=Mm.28073 /len=184 /STRA=for			367.25	361.667	0.984797	0.952282		0.928523	0.732471
97210_at	296	610	508	627		576	473	509	469	457	531	378	373		UI-M-BH1-alw-g-12-0-UI.s1 Mus musculus cDNA, 3' end /clone=UI-M-BH1-alw-g-12-0-UI /clone_end=3' /gb=AW048446 /gi=5908975 /ug=Mm.27711 /len=369 /STRA=for			510.25	502.5	0.984811	0.907284		0.731014	0.740813
94966_at	502	658	372	515		159	322	541	742	736	524	224	315		Glucose-6-phosphate dehydrogenase X-linked /cds=(52,1599) /gb=Z11911 /gi=51113 /ug=Mm.27210 /len=2322 /STRA=for			511.75	504	0.984856	0.95251		0.615535	0.437714
96854_at	548	632	384	576		307	520	571	438	652	674	529	592		Mus musculus copa gene, partial /cds=(0,94) /gb=AJ010391 /gi=5763780 /ug=Mm.30041 /len=95 /STRA=for			535	527	0.985047	0.924826		1.10654	0.988785
102759_at	117	156	134	106		156	174	132	90	106	100	286	140		Mus musculus mRNA phosphatidylinositol 3-kinase p85 beta subunit /cds=(450,2618) /gb=Y13569 /gi=2181944 /ug=Mm.12945 /len=3157 /STRA=for			128.25	126.333	0.985055	0.922711		1.09162	2.23002
101914_at	145	146	100	122		98	70	151	146	151	142	96	81		UI-M-AN1-aff-a-11-0-UI.s1 Mus musculus cDNA, 3' end /clone=UI-M-AN1-aff-a-11-0-UI /clone_end=3' /gb=AI846484 /gi=5490390 /ug=Mm.90698 /len=393 /STRA=for			128.25	126.333	0.985055	0.923898		0.631579	0.748538
98452_at	50	50	50	53		50	50	50	50	50	50	50	50		Mus musculus mRNA for flt-1, complete cds /cds=(251,4252) /gb=D88689 /gi=2809068 /ug=Mm.3464 /len=6275 /STRA=for			50.75	50	0.985222	0.241504		0.985222	0.985222
99444_at	53	50	50	50		50	50	50	50	50	50	54	50		Mus musculus mRNA for receptor activity modifying protein 2 (Ramp2 gene) /cds=(30,599) /gb=AJ250490 /gi=6119626 /ug=Mm.40358 /len=808 /STRA=for			50.75	50	0.985222	0.241504		0.985222	1.06404
97962_at	50	95	50	54		50	50	79	86	50	53	56	50		Synaptojanin 2 /cds=(0,3402) /gb=AF041859 /gi=3241988 /ug=Mm.30717 /len=3848 /STRA=for			62.25	61.3333	0.985274	0.941524		0.803213	0.899598
96899_at	413	610	424	345		281	315	480	501	561	511	377	389		UI-M-BH2.1-apm-e-09-0-UI.s1 Mus musculus cDNA, 3' end /clone=UI-M-BH2.1-apm-e-09-0-UI /clone_end=3' /gb=AW123802 /gi=6099332 /ug=Mm.30113 /len=371 /STRA=for			448	441.5	0.985491	0.931974		0.868304	0.841518
98930_at	270	388	227	252		141	249	319	304	245	423	300	206		UI-M-AL1-ahr-h-03-0-UI.s1 Mus musculus cDNA, 3' end /clone=UI-M-AL1-ahr-h-03-0-UI /clone_end=3' /gb=AI844701 /gi=5488607 /ug=Mm.28668 /len=487 /STRA=for			284.25	280.167	0.985635	0.94325		0.724714	1.05541
99777_s_at	107	129	91	114		71	56	133	111	139	142	114	89		C76650 Mus musculus cDNA, 3' end /clone=J0015G08 /clone_end=3' /gb=C76650 /gi=2516980 /ug=Mm.97081 /len=611 /STRA=rev			110.25	108.667	0.985639	0.938395		0.807256	1.03401
101959_r_at	1174	1495	760	985		704	712	1319	1364	1117	1310	1265	626		Transcription factor Dp 1 /cds=(54,1286) /gb=X72310 /gi=395280 /ug=Mm.925 /len=1700 /STRA=for			1103.5	1087.67	0.985652	0.938475		0.567286	1.14635
94440_at	73	50	50	50		65	65	50	50	50	50	50	50		ud67g09.x1 Mus musculus cDNA, 3' end /clone=IMAGE-1451008 /clone_end=3' /gb=AI173533 /gi=3719675 /ug=Mm.26574 /len=496 /STRA=rev			55.75	55	0.986547	0.90399		0.896861	0.896861
94805_f_at	5869	5109	5069	4867		5307	5098	6585	4835	4124	5006	6189	3205		Mouse histone H2A.1 gene, complete cds /cds=(45,437) /gb=M33988 /gi=193730 /ug=Mm.22676 /len=506 /STRA=for			5228.5	5159.17	0.986739	0.880625		0.612987	1.1837
104174_at	50	79	50	50		50	50	60	79	50	50	50	50		Phosphodiesterase I/nucleotide pyrophosphatase 1 /cds=(111,2828) /gb=J02700 /gi=200236 /ug=Mm.27254 /len=3224 /STRA=rev			57.25	56.5	0.9869	0.930104		0.873362	0.873362
103374_at	50	54	50	50		52	50	50	50	50	50	50	50		ud67f04.x1 Mus musculus cDNA, 3' end /clone=IMAGE-1450975 /clone_end=3' /gb=AI173521 /gi=3719663 /ug=Mm.18589 /len=543 /STRA=for			51	50.3333	0.986928	0.477011		0.980392	0.980392
99804_at	50	54	50	50		52	50	50	50	50	50	50	50		Mouse alpha-2 adrenergic receptor gene, complete cds /cds=(0,1376) /gb=M97516 /gi=191728 /ug=Mm.57205 /len=1377 /STRA=for			51	50.3333	0.986928	0.477011		0.980392	0.980392
95147_at	689	1210	997	1308		783	1165	1400	1043	841	992	878	1393		UI-M-AN1-afc-e-05-0-UI.s1 Mus musculus cDNA, 3' end /clone=UI-M-AN1-afc-e-05-0-UI /clone_end=3' /gb=AI843795 /gi=5478008 /ug=Mm.29456 /len=462 /STRA=for			1051	1037.33	0.986997	0.933136		1.3254	0.835395
93812_at	538	694	388	567		362	334	687	644	641	570	527	337		Mus musculus chloride ion current inducer protein (CLCI) mRNA, partial cds /cds=(0,710) /gb=U53455 /gi=1399647 /ug=Mm.21482 /len=711 /STRA=for			546.75	539.667	0.987045	0.940973		0.616369	0.963877
95964_at	50	58	50	50		58	50	50	50	50	50	50	50		C77404 Mus musculus cDNA, 3' end /clone=J0030E06 /clone_end=3' /gb=C77404 /gi=2517734 /ug=Mm.24954 /len=508 /STRA=rev			52	51.3333	0.987179	0.77905		0.961538	0.961538
98026_g_at	58	50	50	50		50	50	50	50	50	58	50	50		Ecotropic viral integration site 2 /cds=(191,862) /gb=M34896 /gi=193202 /ug=Mm.3266 /len=1217 /STRA=for			52	51.3333	0.987179	0.77905		0.961538	0.961538
101031_at	109	122	50	64		50	50	99	98	122	92	60	70		Mouse surfeit locus surfeit 3 protein gene /cds=(0,923) /gb=M14689 /gi=201081 /ug=Mm.6874 /len=924 /STRA=for			86.25	85.1667	0.98744	0.958553		0.811594	0.695652
93246_at	151	186	123	157		121	74	200	157	181	181	206	108		um80e10.x1 Mus musculus cDNA, 3' end /clone=IMAGE-2317674 /clone_end=3' /gb=AW260482 /gi=6633463 /ug=Mm.6043 /len=635 /STRA=rev			154.25	152.333	0.987574	0.943217		0.700162	1.33549
96526_at	68	178	104	53		99	50	85	57	152	154	81	50		up22f10.x1 Mus musculus cDNA, 3' end /clone=IMAGE-2655115 /clone_end=3' /gb=AW228840 /gi=6558136 /ug=Mm.2670 /len=133 /STRA=for			100.75	99.5	0.987593	0.969692		0.496278	0.80397
97426_at	4193	5885	4285	4129		4182	2936	5031	4650	5137	5459	2718	2957		Epithelial membrane protein 1 /cds=(0,482) /gb=X98471 /gi=1580765 /ug=Mm.30024 /len=483 /STRA=for			4623	4565.83	0.987634	0.92288		0.639628	0.58793
93010_at	59	84	52	50		50	50	50	113	50	50	50	50		Mus musculus mRNA for poly-glutamine tract-binding protein (PQBP-1 gene) /cds=(0,791) /gb=AJ250406 /gi=6103004 /ug=Mm.14616 /len=821 /STRA=for			61.25	60.5	0.987755	0.960044		0.816327	0.816327
95529_at	392	626	340	361		193	301	531	591	340	592	366	266		Mus musculus SH3-containing protein SH3P7 mRNA, complete cds. similar to Human Drebrin /cds=(30,1331) /gb=U58884 /gi=1407654 /ug=Mm.27622 /len=2291 /STRA=rev			429.75	424.667	0.988171	0.96109		0.618965	0.851658
92384_at	82	78	85	66		55	50	66	91	116	83	51	50		Xeroderma pigmentosum, complementation group A /cds=(91,909) /gb=X74351 /gi=440564 /ug=Mm.4049 /len=938 /STRA=for			77.75	76.8333	0.98821	0.945937		0.643087	0.655949
94044_at	193	290	194	197		153	127	230	322	222	242	246	160		vr54d07.s1 Mus musculus cDNA, 5' end /clone=IMAGE-1124461 /clone_end=5' /gb=AA692708 /gi=2693646 /ug=Mm.21964 /len=170 /STRA=for			218.5	216	0.988558	0.951807		0.732265	1.12586
98051_at	254	322	266	292		269	292	213	226	370	312	279	258		UI-M-BH0-aiy-g-09-0-UI.s1 Mus musculus cDNA, 3' end /clone=UI-M-BH0-aiy-g-09-0-UI /clone_end=3' /gb=AI852808 /gi=5496714 /ug=Mm.34315 /len=359 /STRA=for			283.5	280.333	0.98883	0.923341		0.910053	0.984127
104157_at	67	104	50	50		50	50	85	68	66	83	51	50		UI-M-BH2.2-aqi-a-09-0-UI.s1 Mus musculus cDNA, 3' end /clone=UI-M-BH2.2-aqi-a-09-0-UI /clone_end=3' /gb=AW125643 /gi=6101173 /ug=Mm.27090 /len=462 /STRA=rev			67.75	67	0.98893	0.954415		0.738007	0.752768
101214_f_at	6984	11292	8937	6223		6460	7175	8470	8527	8855	10113	7877	5453		Glyceraldehyde-3-phosphate dehydrogenase /cds=(46,1047) /gb=M32599 /gi=193423 /ug=Mm.5289 /len=1228 /STRA=for			8359	8266.67	0.988954	0.935822		0.652351	0.942338
92753_at	83	61	50	50		50	82	50	80	50	50	50	50		Myeloid ecotropic viral integration site-related gene 2 /cds=(126,1262) /gb=U57344 /gi=1724055 /ug=Mm.4710 /len=1783 /STRA=for			61	60.3333	0.989071	0.949639		0.819672	0.819672
101451_at	177	50	50	70		86	50	129	98	91	61	304	117		Mus musculus zinc finger protein (Peg3) mRNA, complete cds /cds=(13,4728) /gb=AF038939 /gi=2791677 /ug=Mm.7952 /len=5560 /STRA=for			86.75	85.8333	0.989433	0.974696		1.3487	3.50432
99578_at	583	806	380	408		200	243	803	948	551	487	585	167		Topoisomerase (DNA) II alpha /cds=(0,829) /gb=U01915 /gi=404643 /ug=Mm.4237 /len=1331 /STRA=for			544.25	538.667	0.989741	0.974674		0.306844	1.07487
103099_f_at	638	1006	593	705		661	671	739	828	704	765	820	611		ui16h11.r1 Mus musculus cDNA, 5' end /clone=IMAGE-1851525 /clone_end=5' /gb=AI663971 /gi=4767554 /ug=Mm.17537 /len=400 /STRA=for			735.5	728	0.989803	0.927858		0.830727	1.11489
100978_at	148	239	103	106		74	97	162	215	149	188	184	90		FSHD region gene 1 /cds=(116,892) /gb=U62105 /gi=1762524 /ug=Mm.67 /len=1022 /STRA=for			149	147.5	0.989933	0.96874		0.604027	1.2349
103389_at	50	92	50	74		50	52	54	71	70	98	50	50		Mus musculus mRNA encoding lysine-ketoglutarate reductase/saccharopine dehydrogenase /cds=(12,2792) /gb=AJ224761 /gi=4107273 /ug=Mm.18651 /len=3300 /STRA=for			66.5	65.8333	0.989975	0.958155		0.75188	0.75188
96104_at	321	446	212	256		202	179	454	347	295	357	183	115		uh58b11.r1 Mus musculus cDNA, 5' end /clone=IMAGE-1749597 /clone_end=5' /gb=AI047107 /gi=3295394 /ug=Mm.26879 /len=403 /STRA=for			308.75	305.667	0.990013	0.964044		0.37247	0.592713
92596_at	560	840	394	552		319	279	880	689	647	670	742	266		Mus musculus calcyclin binding protein (CACYBP) mRNA, partial cds /cds=(0,744) /gb=U97327 /gi=3138917 /ug=Mm.10702 /len=1404 /STRA=for			586.5	580.667	0.990054	0.967789		0.453538	1.26513
103631_at	50	52	50	50		50	50	50	50	50	50	50	50		ua66g12.r1 Mus musculus cDNA, 5' end /clone=IMAGE-1362502 /clone_end=5' /gb=AA985795 /gi=3167184 /ug=Mm.20301 /len=461 /STRA=for			50.5	50	0.990099	0.241504		0.990099	0.990099
104541_at	50	50	50	52		50	50	50	50	50	50	50	50		Proteinase 3 /cds=(0,761) /gb=U43525 /gi=1165220 /ug=Mm.2364 /len=971 /STRA=for			50.5	50	0.990099	0.241504		0.990099	0.990099
92190_at	50	52	50	50		50	50	50	50	50	50	50	50		Orphan receptor, TR2-11 /cds=(0,1772) /gb=U28280 /gi=1173532 /ug=Mm.3398 /len=1773 /STRA=for			50.5	50	0.990099	0.241504		0.990099	0.990099
92690_at	50	50	50	52		50	50	50	50	50	50	50	50		Gastric intrinsic factor /cds=(0,1253) /gb=L24191 /gi=435091 /ug=Mm.456 /len=1443 /STRA=for			50.5	50	0.990099	0.241504		0.990099	0.990099
95303_at	50	52	50	50		50	50	50	50	50	50	50	50		mr16c09.r1 Mus musculus cDNA, 5' end /clone=IMAGE-597616 /clone_end=5' /gb=AA144469 /gi=1713847 /ug=Mm.19963 /len=151 /STRA=for			50.5	50	0.990099	0.241504		0.990099	0.990099
96538_at	52	50	50	50		50	50	50	50	50	50	50	50		vb31d02.r1 Mus musculus cDNA, 5' end /clone=IMAGE-750531 /clone_end=5' /gb=AA472923 /gi=2201150 /ug=Mm.27644 /len=286 /STRA=for			50.5	50	0.990099	0.241504		0.990099	0.990099
97141_s_at	50	52	50	50		50	50	50	50	50	50	50	50		C79038 Mus musculus cDNA, 3' end /clone=J0059D11 /clone_end=3' /gb=C79038 /gi=2519368 /ug=Mm.34940 /len=608 /STRA=rev			50.5	50	0.990099	0.241504		0.990099	0.990099
104325_at	50	50	56	50		56	50	50	50	50	50	50	50		uc42e08.x1 Mus musculus cDNA, 3' end /clone=IMAGE-1400678 /clone_end=3' /gb=AI461631 /gi=4315661 /ug=Mm.22455 /len=420 /STRA=for			51.5	51	0.990291	0.77905		0.970874	0.970874
100120_at	226	279	158	202		123	117	332	310	172	231	101	95		Nidogen /cds=(0,751) /gb=L17324 /gi=439608 /ug=Mm.4691 /len=752 /STRA=for			216.25	214.167	0.990366	0.968596		0.439306	0.467052
96849_at	314	454	285	306		149	223	412	384	374	477	191	171		vs24h12.r1 Mus musculus cDNA, 5' end /clone=IMAGE-1139207 /clone_end=5' /gb=AA655369 /gi=2591523 /ug=Mm.30034 /len=545 /STRA=for			339.75	336.5	0.990434	0.96428		0.503311	0.562178
92541_at	50	62	50	50		50	50	50	50	50	65	57	57		Murine MLC1F/MLC3F gene for myosin alkali light chain (exon 1) (fast skeletal muscle isoform) /cds=(125,238) /gb=X12973 /gi=53140 /ug=Mm.1000 /len=250 /STRA=for			53	52.5	0.990566	0.901729		1.07547	1.07547
96185_at	644	960	565	731		519	477	756	903	729	925	510	846		Adaptor-related protein complex AP-3, delta subunit /cds=(220,3819) /gb=AB004305 /gi=2828340 /ug=Mm.28463 /len=4730 /STRA=rev			725	718.167	0.990575	0.954937		1.1669	0.703448
96627_at	149	243	116	130		85	82	255	227	139	160	55	108		Phenylalkylamine Ca2+ antagonist (emopamil) binding protein /cds=(135,827) /gb=X97755 /gi=1545956 /ug=Mm.27183 /len=1106 /STRA=for			159.5	158	0.990596	0.973021		0.677116	0.344828
100516_at	109	213	127	160		68	87	154	132	197	267	55	97		Mus musculus Chetk-alpha gene for choline/ethanolamine kinase-alpha, exon 9, 10, 11 and complete cds /cds=(0,1307) /gb=AB030621 /gi=6539494 /ug=Mm.5262 /len=1308 /STRA=for			152.25	150.833	0.990695	0.973652		0.63711	0.361248
93966_at	160	350	147	153		92	100	284	237	234	257	166	117		UI-M-AL1-ahl-h-11-0-UI.s1 Mus musculus cDNA, 3' end /clone=UI-M-AL1-ahl-h-11-0-UI /clone_end=3' /gb=AI849706 /gi=5493612 /ug=Mm.21634 /len=217 /STRA=for			202.5	200.667	0.990947	0.975366		0.577778	0.819753
94541_at	50	64	50	62		64	64	50	50	50	58	64	85		UI-M-AN0-acn-h-08-0-UI.s1 Mus musculus cDNA, 3' end /clone=UI-M-AN0-acn-h-08-0-UI /clone_end=3' /gb=AI839549 /gi=5473762 /ug=Mm.29065 /len=162 /STRA=for			56.5	56	0.99115	0.916603		1.50442	1.13274
97261_at	269	679	282	284		164	50	637	566	359	475	170	233		Heat shock protein, DNAJ-like 2 /cds=(91,1284) /gb=AF055664 /gi=3025863 /ug=Mm.27897 /len=2242 /STRA=for			378.5	375.167	0.991193	0.981821		0.615588	0.449141
93252_at	466	880	474	556		321	145	831	826	667	745	75	158		M.musculus BAP31 mRNA /cds=(2,739) /gb=X81816 /gi=1487985 /ug=Mm.17 /len=1132 /STRA=for			594	589.167	0.991863	0.977465		0.265993	0.126263
102063_at	50	55	50	50		50	50	50	53	50	52	50	50		Mus musculus 3-phosphoinositide dependent protein kinase-1 mRNA, complete cds /cds=(91,1770) /gb=AF079535 /gi=4028126 /ug=Mm.10504 /len=1923 /STRA=for			51.25	50.8333	0.99187	0.737088		0.97561	0.97561
97594_r_at	918	1439	879	1001		886	848	1207	1384	961	1018	580	803		C79694 Mus musculus cDNA, 3' end /clone=J0070F03 /clone_end=3' /gb=C79694 /gi=2520024 /ug=Mm.89577 /len=439 /STRA=rev			1059.25	1050.67	0.991897	0.954761		0.758084	0.547557
98431_at	100	198	114	82		90	93	179	179	50	144	57	66		UI-M-BH1-anb-d-08-0-UI.s1 Mus musculus cDNA, 3' end /clone=UI-M-BH1-anb-d-08-0-UI /clone_end=3' /gb=AW049275 /gi=5909769 /ug=Mm.34365 /len=557 /STRA=for			123.5	122.5	0.991903	0.977127		0.534413	0.461538
103894_at	1862	2769	1621	2027		1144	2086	2462	2218	2239	2170	2174	2171		UI-M-BH1-amx-f-12-0-UI.s1 Mus musculus cDNA, 3' end /clone=UI-M-BH1-amx-f-12-0-UI /clone_end=3' /gb=AW060871 /gi=6008622 /ug=Mm.21297 /len=463 /STRA=for			2069.75	2053.17	0.991988	0.958199		1.04892	1.05037
94850_at	411	651	551	563		449	386	563	552	699	589	198	388		Mus musculus mRNA for mitochondrial acyl-CoA thioesterase, clone 2 /cds=(97,1416) /gb=AJ238894 /gi=5102775 /ug=Mm.23368 /len=1557 /STRA=for			544	539.667	0.992034	0.951059		0.713235	0.363971
96009_s_at	71	86	100	50		141	70	50	51	50	95	85	55		Pancreatitis-associated protein /cds=(31,558) /gb=D63359 /gi=1911090 /ug=Mm.2553 /len=759 /STRA=for			76.75	76.1667	0.9924	0.977865		0.716612	1.10749
99458_i_at	639	835	604	627		486	411	778	893	646	813	688	559		ELKL motif kinase /cds=(93,2417) /gb=X70764 /gi=57919 /ug=Mm.4082 /len=2763 /STRA=for			676.25	671.167	0.992483	0.963085		0.826617	1.01738
98433_at	81	169	66	50		50	50	132	114	125	74	50	68		BH3 interacting domain death agonist /cds=(18,605) /gb=U75506 /gi=1669513 /ug=Mm.34384 /len=791 /STRA=for			91.5	90.8333	0.992714	0.981859		0.743169	0.546448
97419_at	205	298	209	216		187	200	251	239	262	243	187	229		UI-M-BH1-anv-g-02-0-UI.s1 Mus musculus cDNA, 3' end /clone=UI-M-BH1-anv-g-02-0-UI /clone_end=3' /gb=AW060956 /gi=6008707 /ug=Mm.29985 /len=493 /STRA=for			232	230.333	0.992816	0.944491		0.987069	0.806034
92563_at	87	90	68	84		50	54	50	61	149	126	80	50		Mus musculus FLI-LRR associated protein-1 mRNA, complete cds /cds=(151,2037) /gb=AF045573 /gi=3025717 /ug=Mm.10272 /len=2763 /STRA=for			82.25	81.6667	0.992908	0.98022		0.607903	0.972644
93621_at	136	150	106	86		80	114	165	93	165	95	166	50		vy94b01.r1 Mus musculus cDNA, 5' end /clone=IMAGE-1313833 /clone_end=5' /gb=AA914350 /gi=3053742 /ug=Mm.7398 /len=435 /STRA=for			119.5	118.667	0.993026	0.971089		0.41841	1.38912
100603_at	74	139	74	50		50	50	66	108	123	105	73	63		Dynein, cytoplasmic, intermediate chain 2 /cds=(77,1915) /gb=AF063231 /gi=3493590 /ug=Mm.6441 /len=2458 /STRA=for			84.25	83.6667	0.993076	0.979778		0.747774	0.866469
93290_at	447	587	354	371		210	251	655	656	451	398	285	312		Mus musculus purine nucleoside phosphorylase (Np-b) mRNA, complete cds /cds=(0,869) /gb=U35374 /gi=1144566 /ug=Mm.17932 /len=870 /STRA=for			439.75	436.833	0.993367	0.978792		0.709494	0.648096
102207_at	50	52	50	50		50	51	50	50	50	50	52	50		UI-M-BH2.1-apg-a-04-0-UI.s1 Mus musculus cDNA, 3' end /clone=UI-M-BH2.1-apg-a-04-0-UI /clone_end=3' /gb=AW123249 /gi=6098744 /ug=Mm.100253 /len=347 /STRA=rev			50.5	50.1667	0.993399	0.477011		0.990099	1.0297
97450_s_at	382	379	178	293		200	172	347	431	362	324	428	330		uc74b03.y1 Mus musculus cDNA, 5' end /clone=IMAGE-1431341 /clone_end=5' /gb=AA986258 /gi=3167582 /ug=Mm.30250 /len=552 /STRA=for			308	306	0.993506	0.975674		1.07143	1.38961
95998_at	50	50	56	50		50	50	50	57	50	50	50	50		C79930 Mus musculus cDNA, 3' end /clone=J0073H08 /clone_end=3' /gb=C79930 /gi=2520260 /ug=Mm.25070 /len=597 /STRA=rev			51.5	51.1667	0.993528	0.863649		0.970874	0.970874
96861_at	73	119	50	76		50	50	110	74	85	105	74	74		UI-M-BH0-ajo-e-04-0-UI.s1 Mus musculus cDNA, 3' end /clone=UI-M-BH0-ajo-e-04-0-UI /clone_end=3' /gb=AI852376 /gi=5496282 /ug=Mm.30052 /len=348 /STRA=for			79.5	79	0.993711	0.977878		0.930818	0.930818
103076_at	283	393	190	215		93	86	355	345	404	329	284	199		UI-M-BH1-alf-a-06-0-UI.s1 Mus musculus cDNA, 3' end /clone=UI-M-BH1-alf-a-06-0-UI /clone_end=3' /gb=AW046093 /gi=5906622 /ug=Mm.17087 /len=258 /STRA=for			270.25	268.667	0.994141	0.984775		0.736355	1.05088
93071_at	1936	2970	2417	2597		1779	2018	3570	3238	1978	2211	2044	1482		M.musculus mRNA for TIF1 beta protein /cds=(168,2672) /gb=X99644 /gi=1480113 /ug=Mm.15701 /len=2858 /STRA=for			2480	2465.67	0.99422	0.973445		0.597581	0.824194
96113_at	676	861	653	683		540	441	833	859	802	810	762	523		UI-M-AN1-aff-e-06-0-UI.s1 Mus musculus cDNA, 3' end /clone=UI-M-AN1-aff-e-06-0-UI /clone_end=3' /gb=AI846519 /gi=5490425 /ug=Mm.26956 /len=234 /STRA=for			718.25	714.167	0.994315	0.967804		0.728159	1.06091
99073_at	338	604	410	355		347	286	587	566	399	361	292	247		Cyclin F /cds=(39,2369) /gb=Z47766 /gi=633246 /ug=Mm.4008 /len=2815 /STRA=for			426.75	424.333	0.994337	0.976462		0.578793	0.684241
97205_at	581	1076	681	506		376	362	880	813	912	899	550	382		UI-M-AH1-agp-h-08-0-UI.s1 Mus musculus cDNA, 3' end /clone=UI-M-AH1-agp-h-08-0-UI /clone_end=3' /gb=AI848056 /gi=5491962 /ug=Mm.27695 /len=369 /STRA=for			711	707	0.994374	0.981584		0.537271	0.773558
103799_at	85	97	58	57		50	50	69	97	76	101	66	50		Mus musculus myotubularin homologous protein 3 mRNA, partial cds /cds=(0,365) /gb=AF073881 /gi=3916225 /ug=Mm.20844 /len=940 /STRA=for			74.25	73.8333	0.994388	0.976579		0.673401	0.888889
103097_at	279	265	128	162		122	148	253	236	202	283	181	133		UI-M-AJ1-ahe-e-12-0-UI.s1 Mus musculus cDNA, 3' end /clone=UI-M-AJ1-ahe-e-12-0-UI /clone_end=3' /gb=AI844487 /gi=5488393 /ug=Mm.17523 /len=363 /STRA=for			208.5	207.333	0.994404	0.979242		0.63789	0.868106
101653_f_at	50	98	50	50		50	99	61	50	50	60	50	57		Histocompatibility 2, D region locus 4 /cds=(94,522) /gb=X52914 /gi=57863 /ug=Mm.30377 /len=613 /STRA=for			62	61.6667	0.994624	0.980998		0.919355	0.806452
99843_at	50	106	50	50		50	50	50	67	115	50	50	50		Paired-like homeodomain transcription factor 3 /cds=(133,1041) /gb=AF005772 /gi=2645426 /ug=Mm.6255 /len=1392 /STRA=for			64	63.6667	0.994792	0.985098		0.78125	0.78125
101444_at	147	253	146	161		104	58	230	177	239	247	123	119		Gene trap ROSA 26 antisense /cds=(90,1607) /gb=U83176 /gi=1778860 /ug=Mm.781 /len=1974 /STRA=for			176.75	175.833	0.994814	0.984256		0.673267	0.695898
103620_s_at	262	329	216	231		171	211	339	347	250	231	267	142		Survival motor neuron /cds=(0,866) /gb=U77714 /gi=1946332 /ug=Mm.2025 /len=1250 /STRA=for			259.5	258.167	0.994862	0.974977		0.547206	1.0289
94073_at	989	1702	759	1085		648	661	1627	1449	1108	1275	1142	846		UI-M-AQ0-aaj-h-11-0-UI.s2 Mus musculus cDNA, 3' end /clone=UI-M-AQ0-aaj-h-11-0-UI /clone_end=3' /gb=AI836182 /gi=5470395 /ug=Mm.22117 /len=542 /STRA=for			1133.75	1128	0.994928	0.982971		0.746196	1.00728
95536_at	185	196	233	184		200	181	171	212	197	230	214	262		Mus musculus mRNA for elongin A, complete cds /cds=(8,2329) /gb=AB025015 /gi=6009623 /ug=Mm.27663 /len=2537 /STRA=for			199.5	198.5	0.994987	0.945268		1.31328	1.07268
92972_at	106	50	50	60		53	50	50	84	50	110	100	116		Mouse V(preB)1 gene 4.6 kb upstream of lambda5 locus /cds=(0,428) /gb=X05557 /gi=55413 /ug=Mm.5008 /len=609 /STRA=for			66.5	66.1667	0.994987	0.984548		1.74436	1.50376
100768_at	50	51	50	50		50	50	50	50	50	50	50	50		C77307 Mus musculus cDNA, 3' end /clone=J0028H03 /clone_end=3' /gb=C77307 /gi=2517637 /ug=Mm.97082 /len=579 /STRA=rev			50.25	50	0.995025	0.241504		0.995025	0.995025
103299_at	50	51	50	50		50	50	50	50	50	50	50	50		UI-M-BH2.1-apm-c-03-0-UI.s1 Mus musculus cDNA, 3' end /clone=UI-M-BH2.1-apm-c-03-0-UI /clone_end=3' /gb=AW123773 /gi=6099303 /ug=Mm.21067 /len=402 /STRA=rev			50.25	50	0.995025	0.241504		0.995025	0.995025
103491_at	50	51	50	50		50	50	50	50	50	50	50	50		uh11h01.r1 Mus musculus cDNA, 5' end /clone=IMAGE-1617649 /clone_end=5' /gb=AA968123 /gi=3142016 /ug=Mm.22202 /len=415 /STRA=for			50.25	50	0.995025	0.241504		0.995025	0.995025
103869_at	50	51	50	50		50	50	50	50	50	50	50	50		Mus musculus thrombospondin 3 (Thbs3) gene, partial cds and mucin 1 (Muc1) gene, complete cds /cds=(0,371) /gb=U16175 /gi=608488 /ug=Mm.2114 /len=615 /STRA=for			50.25	50	0.995025	0.241504		0.995025	0.995025
92238_at	51	50	50	50		50	50	50	50	50	50	50	50		UI-M-BH2.2-aov-b-04-0-UI.s1 Mus musculus cDNA, 3' end /clone=UI-M-BH2.2-aov-b-04-0-UI /clone_end=3' /gb=AW122193 /gi=6097648 /ug=Mm.34769 /len=302 /STRA=rev			50.25	50	0.995025	0.241504		0.995025	0.995025
92329_at	50	51	50	50		50	50	50	50	50	50	50	50		RAB17, member RAS oncogene family /cds=(0,644) /gb=X70804 /gi=297156 /ug=Mm.38889 /len=645 /STRA=for			50.25	50	0.995025	0.241504		0.995025	0.995025
92746_at	50	51	50	50		50	50	50	50	50	50	50	50		Mus musculus arylamine N-acetyltransferase stable form (NAT2) gene, complete cds /cds=(0,872) /gb=U37249 /gi=1049296 /ug=Mm.4695 /len=873 /STRA=rev			50.25	50	0.995025	0.241504		0.995025	0.995025
92812_f_at	51	50	50	50		50	50	50	50	50	50	50	50		Defensin related cryptdin peptide /cds=(45,326) /gb=U02995 /gi=2182210 /ug=Mm.12833 /len=336 /STRA=for			50.25	50	0.995025	0.241504		0.995025	0.995025
94394_at	50	51	50	50		50	50	50	50	50	50	50	50		Harvey rat sarcoma oncogene, subgroup R /cds=(11,667) /gb=M21019 /gi=200676 /ug=Mm.257 /len=949 /STRA=rev			50.25	50	0.995025	0.241504		0.995025	0.995025
94793_at	50	51	50	50		50	50	50	50	50	50	50	50		vp31b10.r1 Mus musculus cDNA, 5' end /clone=IMAGE-1078267 /clone_end=5' /gb=AA796791 /gi=2859746 /ug=Mm.177 /len=365 /STRA=for			50.25	50	0.995025	0.241504		0.995025	0.995025
95997_at	51	50	50	50		50	50	50	50	50	50	50	54		C79758 Mus musculus cDNA, 3' end /clone=J0071E01 /clone_end=3' /gb=C79758 /gi=2520088 /ug=Mm.25069 /len=601 /STRA=rev			50.25	50	0.995025	0.241504		1.07463	0.995025
98809_s_at	50	50	51	50		50	50	50	50	50	50	61	50		Neurofibromatosis 1 /cds=(0,741) /gb=D30730 /gi=577637 /ug=Mm.4820 /len=1187 /STRA=for			50.25	50	0.995025	0.241504		0.995025	1.21393
95673_s_at	2199	1955	2568	2059		3330	1395	1695	1408	2660	2620	1181	1532		UI-M-BH2.1-apr-b-09-0-UI.s1 Mus musculus cDNA, 3' end /clone=UI-M-BH2.1-apr-b-09-0-UI /clone_end=3' /gb=AW124113 /gi=6099643 /ug=Mm.29586 /len=265 /STRA=for			2195.25	2184.67	0.995179	0.980577		0.69787	0.53798
94468_at	103	93	99	54		72	88	50	115	144	52	91	78		UI-M-AN1-afg-e-11-0-UI.s1 Mus musculus cDNA, 3' end /clone=UI-M-AN1-afg-e-11-0-UI /clone_end=3' /gb=AI842102 /gi=5476315 /ug=Mm.28848 /len=355 /STRA=for			87.25	86.8333	0.995224	0.984574		0.893983	1.04298
92269_r_at	50	50	50	63		50	50	68	50	50	50	50	79		UI-M-AP0-abf-g-08-0-UI.s1 Mus musculus cDNA, 3' end /clone=UI-M-AP0-abf-g-08-0-UI /clone_end=3' /gb=AI836610 /gi=5470823 /ug=Mm.3590 /len=130 /STRA=for			53.25	53	0.995305	0.95749		1.48357	0.938967
92504_at	65	50	50	50		50	50	71	50	50	50	50	50		Mus musculus Hus1-like protein (Hus1) mRNA, complete cds /cds=(18,863) /gb=AF076845 /gi=4019218 /ug=Mm.42201 /len=1084 /STRA=rev			53.75	53.5	0.995349	0.96343		0.930233	0.930233
104132_at	306	399	176	278		171	246	422	416	204	272	254	224		UI-M-BH1-amh-c-02-0-UI.s1 Mus musculus cDNA, 3' end /clone=UI-M-BH1-amh-c-02-0-UI /clone_end=3' /gb=AW047276 /gi=5907805 /ug=Mm.22072 /len=602 /STRA=for			289.75	288.5	0.995686	0.985242		0.77308	0.876618
104759_at	104	136	106	57		79	50	125	110	134	104	50	56		UI-M-BH0-akj-c-04-0-UI.s1 Mus musculus cDNA, 3' end /clone=UI-M-BH0-akj-c-04-0-UI /clone_end=3' /gb=AI851421 /gi=5495327 /ug=Mm.24797 /len=337 /STRA=for			100.75	100.333	0.995864	0.984246		0.555831	0.496278
96810_at	50	84	59	50		70	50	50	77	50	66	50	66		ud58a11.r1 Mus musculus cDNA, 5' end /clone=IMAGE-1450076 /clone_end=5' /gb=AI154017 /gi=3682486 /ug=Mm.29266 /len=156 /STRA=for			60.75	60.5	0.995885	0.978116		1.08642	0.823045
93317_at	50	121	73	86		62	90	102	88	81	70	65	50		mc13a10.r1 Mus musculus cDNA, 5' end /clone=IMAGE-348378 /clone_end=5' /gb=W35700 /gi=1317579 /ug=Mm.18502 /len=918 /STRA=for			82.5	82.1667	0.99596	0.981396		0.606061	0.787879
104285_at	140	146	112	116		50	79	182	196	143	118	105	50		3-hydroxy-3-methylglutaryl-coenzyme A reductase /cds=(0,674) /gb=M62766 /gi=193881 /ug=Mm.2226 /len=1045 /STRA=for			128.5	128	0.996109	0.987087		0.389105	0.817121
95533_at	137	180	132	79		78	83	114	164	180	170	118	107		UI-M-BH1-alv-c-01-0-UI.s1 Mus musculus cDNA, 3' end /clone=UI-M-BH1-alv-c-01-0-UI /clone_end=3' /gb=AW048037 /gi=5908531 /ug=Mm.27653 /len=396 /STRA=for			132	131.5	0.996212	0.986412		0.810606	0.893939
101090_at	197	258	50	112		72	60	207	145	188	250	187	81		Fibrillin 1 /cds=(2379,10994) /gb=L29454 /gi=575509 /ug=Mm.735 /len=11953 /STRA=for			154.25	153.667	0.996218	0.991498		0.525122	1.21232
104433_at	118	197	149	163		236	177	145	118	149	112	62	201		UI-M-AL1-ahl-f-01-0-UI.s1 Mus musculus cDNA, 3' end /clone=UI-M-AL1-ahl-f-01-0-UI /clone_end=3' /gb=AI849682 /gi=5493588 /ug=Mm.29228 /len=245 /STRA=rev			156.75	156.167	0.996279	0.983058		1.2823	0.395534
101004_f_at	424	647	490	395		284	391	579	702	451	517	459	229		Splicing factor, arginine/serine-rich 3 (SRp20) /cds=(116,490) /gb=X91656 /gi=2125862 /ug=Mm.6787 /len=1895 /STRA=for			489	487.333	0.996592	0.985186		0.468303	0.93865
99619_at	404	448	271	291		108	192	452	432	492	438	407	172		UI-M-AI1-afs-g-03-0-UI.s1 Mus musculus cDNA, 3' end /clone=UI-M-AI1-afs-g-03-0-UI /clone_end=3' /gb=AI847483 /gi=5491389 /ug=Mm.43212 /len=471 /STRA=for			353.5	352.333	0.9967	0.989817		0.486563	1.15134
102722_g_at	50	52	50	50		50	52	50	50	50	50	50	50		Immunoglobulin heavy chain 8 (heavy chain of IgG3) /cds=UNKNOWN /gb=D14625 /gi=286089 /ug=Mm.14318 /len=1544 /STRA=for			50.5	50.3333	0.9967	0.77905		0.990099	0.990099
93372_at	50	60	50	50		50	50	50	50	50	64	59	50		Acidic nuclear phosphoprotein 32 /cds=(25,768) /gb=U73478 /gi=1763274 /ug=Mm.613 /len=980 /STRA=for			52.5	52.3333	0.996825	0.96343		0.952381	1.12381
96672_at	165	158	172	155		139	182	123	189	161	178	122	173		UI-M-BH2.1-aqb-h-01-0-UI.s1 Mus musculus cDNA, 3' end /clone=UI-M-BH2.1-aqb-h-01-0-UI /clone_end=3' /gb=AW123564 /gi=6099094 /ug=Mm.27401 /len=365 /STRA=for			162.5	162	0.996923	0.971802		1.06462	0.750769
99351_at	50	63	53	54		65	53	60	50	50	51	50	52		C76132 Mus musculus cDNA, 3' end /clone=J0004B07 /clone_end=3' /gb=C76132 /gi=2516462 /ug=Mm.5457 /len=616 /STRA=rev			55	54.8333	0.99697	0.966778		0.945455	0.909091
103476_at	50	50	50	78		50	50	50	50	69	72	50	57		vm74g09.s1 Mus musculus cDNA, 5' end /clone=IMAGE-1004032 /clone_end=5' /gb=AA674794 /gi=2652031 /ug=Mm.21926 /len=175 /STRA=for			57	56.8333	0.997076	0.983367		1	0.877193
94340_at	218	610	502	406		222	286	497	414	579	599	259	271		UI-M-BH2.1-aph-d-08-0-UI.s1 Mus musculus cDNA, 3' end /clone=UI-M-BH2.1-aph-d-08-0-UI /clone_end=3' /gb=AW124224 /gi=6099754 /ug=Mm.25042 /len=383 /STRA=for			434	432.833	0.997312	0.991214		0.624424	0.596774
100983_at	297	470	343	380		288	297	376	331	476	461	344	293		Mus musculus gene for prolyl oligopeptidase /cds=(377,2509) /gb=AB022053 /gi=5689034 /ug=Mm.6735 /len=2981 /STRA=for			372.5	371.5	0.997315	0.98473		0.786577	0.92349
104532_at	241	432	407	343		304	404	350	344	358	369	276	338		UI-M-BH0-ajb-c-07-0-UI.s1 Mus musculus cDNA, 3' end /clone=UI-M-BH0-ajb-c-07-0-UI /clone_end=3' /gb=AI852126 /gi=5496032 /ug=Mm.23173 /len=372 /STRA=for			355.75	354.833	0.997423	0.98114		0.950105	0.775826
103487_at	73	100	149	79		184	50	89	86	86	105	108	166		UI-M-BG0-aib-d-11-0-UI.s1 Mus musculus cDNA, 3' end /clone=UI-M-BG0-aib-d-11-0-UI /clone_end=3' /gb=AI849993 /gi=5493899 /ug=Mm.22154 /len=408 /STRA=rev			100.25	100	0.997506	0.992753		1.65586	1.07731
104720_at	195	214	196	243		148	91	175	285	276	294	101	50		UI-M-BH0-aka-e-07-0-UI.s1 Mus musculus cDNA, 3' end /clone=UI-M-BH0-aka-e-07-0-UI /clone_end=3' /gb=AI854789 /gi=5498695 /ug=Mm.24517 /len=399 /STRA=for			212	211.5	0.997642	0.991281		0.235849	0.476415
101992_at	775	952	697	766		355	740	1139	1156	824	560	666	536		Mus musculus delta proteasome subunit mRNA, complete cds /cds=(69,677) /gb=U13393 /gi=984937 /ug=Mm.98 /len=721 /STRA=for			797.5	795.667	0.997701	0.99152		0.6721	0.83511
101464_at	2434	2379	1296	1702		2563	1431	2259	2133	1573	1731	884	1095		Interferon beta, fibroblast /cds=(0,118) /gb=V00755 /gi=51554 /ug=Mm.8245 /len=222 /STRA=for			1952.75	1948.33	0.997738	0.98906		0.560748	0.452695
92730_at	132	95	237	146		328	159	103	82	116	125	138	119		Heparin binding epidermal growth factor-like growth factor /cds=(225,851) /gb=L07264 /gi=192999 /ug=Mm.4661 /len=1000 /STRA=for			152.5	152.167	0.997814	0.995011		0.780328	0.904918
93852_at	69	107	121	89		65	69	98	134	104	108	82	66		UI-M-BH1-akr-f-12-0-UI.s1 Mus musculus cDNA, 3' end /clone=UI-M-BH1-akr-f-12-0-UI /clone_end=3' /gb=AW045443 /gi=5906012 /ug=Mm.87279 /len=292 /STRA=for			96.5	96.3333	0.998273	0.991905		0.683938	0.849741
103960_at	50	53	50	50		50	50	50	51	53	50	52	97		Mus musculus Rap2 interacting protein 8 (RPIP8) mRNA, complete cds /cds=(0,1340) /gb=U73941 /gi=1916017 /ug=Mm.2560 /len=1809 /STRA=for			50.75	50.6667	0.998358	0.924881		1.91133	1.02463
96934_at	836	653	447	335		370	501	717	753	523	537	795	574		UI-M-BH1-amt-d-01-0-UI.s1 Mus musculus cDNA, 3' end /clone=UI-M-BH1-amt-d-01-0-UI /clone_end=3' /gb=AW049074 /gi=5909603 /ug=Mm.30179 /len=285 /STRA=for			567.75	566.833	0.998385	0.9938		1.01101	1.40026
98794_at	50	50	50	57		50	50	50	50	60	50	50	50		Src-related kinase lacking C-terminal regulatory tyrosine and N-terminal myristylation sites /cds=(278,1768) /gb=D26186 /gi=529072 /ug=Mm.4752 /len=2393 /STRA=for			51.75	51.6667	0.99839	0.974234		0.966184	0.966184
101886_f_at	1063	1298	1121	1100		833	1110	1364	1289	1271	995	739	971		Synthetic D(b) mRNA for D(b) glycoprotein (alpha chain) and beta(2) microglobulin /cds=(9,1097) /gb=X52490 /gi=50671 /ug=Mm.88493 /len=1102 /STRA=rev			1145.5	1143.67	0.9984	0.987275		0.847665	0.645133
96234_at	110	167	93	50		50	81	172	164	73	89	153	72		UI-M-AJ1-aha-c-04-0-UI.s1 Mus musculus cDNA, 3' end /clone=UI-M-AJ1-aha-c-04-0-UI /clone_end=3' /gb=AI849311 /gi=5493217 /ug=Mm.28790 /len=471 /STRA=for			105	104.833	0.998413	0.995995		0.685714	1.45714
100351_f_at	85	50	50	50		50	91	50	50	61	50	50	76		Mus musculus 129 cryptdin-2 (Defcr2) gene /cds=(45,326) /gb=U02997 /gi=2182211 /ug=Mm.88723 /len=336 /STRA=for			58.75	58.6667	0.998582	0.994073		1.29362	0.851064
93393_at	57	77	53	50		50	50	50	91	55	59	72	50		Tabby /cds=(175,1350) /gb=AF016628 /gi=2739470 /ug=Mm.6258 /len=5004 /STRA=for			59.25	59.1667	0.998594	0.993206		0.843882	1.21519
98495_at	211	294	231	260		163	173	305	307	273	271	279	220		UI-M-AK1-aey-b-11-0-UI.s1 Mus musculus cDNA, 3' end /clone=UI-M-AK1-aey-b-11-0-UI /clone_end=3' /gb=AI846906 /gi=5490812 /ug=Mm.3561 /len=336 /STRA=for			249	248.667	0.998661	0.992805		0.883534	1.12048
92714_at	50	105	50	50		72	50	50	50	110	50	50	50		Telencephalin /cds=(40,2793) /gb=U06483 /gi=494941 /ug=Mm.4629 /len=2931 /STRA=rev			63.75	63.6667	0.998693	0.996096		0.784314	0.784314
94024_at	954	1077	897	1080		733	1025	1104	1143	971	1029	1032	936		vn81g12.r1 Mus musculus cDNA, 5' end /clone=IMAGE-1038406 /clone_end=5' /gb=AA671429 /gi=2643508 /ug=Mm.21873 /len=464 /STRA=for			1002	1000.83	0.998836	0.98903		0.934132	1.02994
103005_s_at	76	92	74	65		88	83	52	50	85	102	50	60		CD44 antigen /cds=(9,1976) /gb=X66084 /gi=53679 /ug=Mm.15643 /len=1997 /STRA=for			76.75	76.6667	0.998914	0.994438		0.781759	0.651466
93594_r_at	349	532	600	471		662	601	435	416	470	341	351	624		Epithelial membrane protein 3 /cds=(201,692) /gb=U87948 /gi=2358253 /ug=Mm.20829 /len=695 /STRA=for			488	487.5	0.998975	0.994821		1.27869	0.719262
104545_at	141	125	50	69		50	50	65	70	181	161	122	50		Mus musculus casein kinase II alpha subunit mRNA, complete cds /cds=(203,1378) /gb=U51866 /gi=1262299 /ug=Mm.23692 /len=1552 /STRA=for			96.25	96.1667	0.999134	0.998139		0.519481	1.26753
96824_at	94	85	105	105		108	65	113	139	106	52	76	64		Mus musculus genes for Supl15h and Sox15, partial cds /cds=(0,168) /gb=AB025354 /gi=5103143 /ug=Mm.29387 /len=169 /STRA=for			97.25	97.1667	0.999143	0.99621		0.658098	0.781491
94482_at	456	732	471	512		393	419	615	579	645	603	541	415		Casein kinase II, alpha 2, polypeptide /cds=(98,1150) /gb=AF012251 /gi=2738574 /ug=Mm.28881 /len=1630 /STRA=for			542.75	542.333	0.999232	0.995699		0.764625	0.996776
97330_at	819	958	708	845		601	557	1152	1108	926	650	730	524		UI-M-AN0-aci-g-08-0-UI.s1 Mus musculus cDNA, 3' end /clone=UI-M-AN0-aci-g-08-0-UI /clone_end=3' /gb=AI840499 /gi=5474712 /ug=Mm.29543 /len=426 /STRA=for			832.5	832.333	0.9998	0.999085		0.629429	0.876877
100023_at	188	172	248	144		263	169	167	160	145	224	205	192		Myeloblastosis oncogene-like 2 /cds=(142,2256) /gb=X70472 /gi=312825 /ug=Mm.4594 /len=2632 /STRA=for			188	188	1	1		1.02128	1.09043
103364_f_at	477	431	389	355		444	259	448	450	525	352	327	333		UI-M-BH1-akn-a-02-0-UI.s1 Mus musculus cDNA, 3' end /clone=UI-M-BH1-akn-a-02-0-UI /clone_end=3' /gb=AW045256 /gi=5905785 /ug=Mm.18520 /len=324 /STRA=for			413	413	1	1		0.806295	0.791768
96529_at	50	52	50	50		50	50	53	50	50	50	50	50		UI-M-BH2.2-aoo-d-12-0-UI.s1 Mus musculus cDNA, 3' end /clone=UI-M-BH2.2-aoo-d-12-0-UI /clone_end=3' /gb=AW122059 /gi=6097466 /ug=Mm.27084 /len=303 /STRA=rev			50.5	50.5	1	1		0.990099	0.990099
98039_at	368	427	305	254		171	295	440	471	333	321	242	384		UI-M-BH0-ajr-a-08-0-UI.s1 Mus musculus cDNA, 3' end /clone=UI-M-BH0-ajr-a-08-0-UI /clone_end=3' /gb=AI853819 /gi=5497725 /ug=Mm.34002 /len=369 /STRA=for			338.5	338.5	1	1		1.13442	0.714919
98810_at	50	50	56	50		59	50	50	50	50	50	50	50		5-hydroxytryptamine (serotonin) receptor 5B /cds=(297,1409) /gb=X69867 /gi=288735 /ug=Mm.4833 /len=2041 /STRA=for			51.5	51.5	1	1		0.970874	0.970874
100001_at	50	50	50	50		50	50	50	50	50	50	50	50		CD3 antigen, gamma polypeptide /cds=(104,652) /gb=M18228 /gi=192497 /ug=Mm.4513 /len=670 /STRA=for			50	50	1	#DIV/0!		1	1
100002_at	50	50	50	50		50	50	50	50	50	50	50	50		Inter-alpha trypsin inhibitor, heavy chain 3 /cds=(4,2664) /gb=X70393 /gi=695635 /ug=Mm.4517 /len=2775 /STRA=for			50	50	1	#DIV/0!		1	1
100003_at	50	50	50	50		50	50	50	50	50	50	50	50		Mouse RyR1 mRNA for skeletal muscle ryanodine receptor, partial cds /cds=(0,371) /gb=D38216 /gi=1030707 /ug=Mm.4519 /len=486 /STRA=for			50	50	1	#DIV/0!		1	1
100009_r_at	50	50	50	50		50	50	50	50	50	50	50	50		SRY-box containing gene 2 /cds=(0,959) /gb=X94127 /gi=1209429 /ug=Mm.4541 /len=960 /STRA=for			50	50	1	#DIV/0!		1	1
100013_at	50	50	50	50		50	50	50	50	50	50	50	50		UI-M-BH2.3-aoe-b-05-0-UI.s1 Mus musculus cDNA, 3' end /clone=UI-M-BH2.3-aoe-b-05-0-UI /clone_end=3' /gb=AW121732 /gi=6097065 /ug=Mm.45558 /len=377 /STRA=rev			50	50	1	#DIV/0!		1	1
100017_at	50	50	50	50		50	50	50	50	50	50	50	50		Mus musculus myosin binding protein H (MyBP-H) mRNA, complete cds /cds=(50,1501) /gb=U68267 /gi=1546812 /ug=Mm.4562 /len=1850 /STRA=for			50	50	1	#DIV/0!		1	1
100021_at	50	50	50	50		50	50	50	50	50	50	50	50		Mus musculus acetylcholine receptor alpha-subunit mRNA, complete cds /cds=(104,1477) /gb=M17640 /gi=2073542 /ug=Mm.4583 /len=1860 /STRA=for			50	50	1	#DIV/0!		1	1
100030_at	50	50	50	50		50	50	50	50	50	50	50	50		Mouse mRNA for uridine phosphorylase, complete cds /cds=(278,1213) /gb=D44464 /gi=1526557 /ug=Mm.4610 /len=1278 /STRA=for			50	50	1	#DIV/0!		1	1
100034_at	50	50	50	50		50	50	50	50	50	50	50	50		Mus musculus tumor supressor maspin mRNA, complete cds /cds=(189,1316) /gb=U54705 /gi=1490512 /ug=Mm.4622 /len=1432 /STRA=for			50	50	1	#DIV/0!		1	1
100035_at	50	50	50	50		50	50	50	50	50	50	50	50		Mus musculus natriuretic peptide receptor A (NprA) mRNA, complete cds /cds=(11,3184) /gb=L31932 /gi=473633 /ug=Mm.4627 /len=3209 /STRA=for			50	50	1	#DIV/0!		1	1
100044_at	50	50	50	50		50	50	50	50	50	50	50	50		Oligodendrocyte specific protein /cds=(159,782) /gb=U19582 /gi=633766 /ug=Mm.4425 /len=1801 /STRA=for			50	50	1	#DIV/0!		1	1
100047_at	50	50	50	50		50	50	50	50	50	50	50	50		Synaptosomal-associated protein, 25 kDa /cds=(163,783) /gb=M22012 /gi=200997 /ug=Mm.4435 /len=2037 /STRA=for			50	50	1	#DIV/0!		1	1
100048_at	50	50	50	50		50	50	50	50	50	50	50	50		UI-M-BH1-ani-c-01-0-UI.s1 Mus musculus cDNA, 3' end /clone=UI-M-BH1-ani-c-01-0-UI /clone_end=3' /gb=AW049685 /gi=5910214 /ug=Mm.4436 /len=515 /STRA=for			50	50	1	#DIV/0!		1	1
100049_at	50	50	50	50		50	50	50	50	50	50	50	50		Mouse chromatin nonhistone high mobility group protein (HGM-I(Y), complete cds /cds=(201,491) /gb=J04179 /gi=193883 /ug=Mm.4438 /len=1657 /STRA=for			50	50	1	#DIV/0!		1	1
100052_at	50	50	50	50		50	50	50	50	50	50	50	50		Erythrocyte protein band 7.2 /cds=(90,944) /gb=X91043 /gi=975688 /ug=Mm.4441 /len=1360 /STRA=for			50	50	1	#DIV/0!		1	1
100058_at	50	50	50	50		50	50	50	50	50	50	50	50		UI-M-BH1-alk-e-07-0-UI.s1 Mus musculus cDNA, 3' end /clone=UI-M-BH1-alk-e-07-0-UI /clone_end=3' /gb=AW047776 /gi=5908305 /ug=Mm.44711 /len=361 /STRA=for			50	50	1	#DIV/0!		1	1
100060_i_at	50	50	50	50		50	50	50	50	50	50	50	50		Mouse potential kallikrein gene /cds=(0,785) /gb=M13500 /gi=4263012 /ug=Mm.4486 /len=786 /STRA=for			50	50	1	#DIV/0!		1	1
100061_f_at	50	50	50	50		50	50	50	50	50	50	50	50		Mouse potential kallikrein gene /cds=(0,785) /gb=M13500 /gi=4263012 /ug=Mm.4486 /len=786 /STRA=for			50	50	1	#DIV/0!		1	1
100067_at	50	50	50	50		50	50	50	50	50	50	50	50		Aldehyde reductase 1 /cds=(25,975) /gb=D32250 /gi=1384073 /ug=Mm.451 /len=1337 /STRA=for			50	50	1	#DIV/0!		1	1
100078_at	50	50	50	50		50	50	50	50	50	50	50	50		Mouse apolipoprotein A-IV (apoa-A) mRNA, complete cds /cds=(92,1267) /gb=M64248 /gi=191884 /ug=Mm.4533 /len=1427 /STRA=rev			50	50	1	#DIV/0!		1	1
100080_at	50	50	50	50		50	50	50	50	50	50	50	50		Parotid secretory protein /cds=(0,707) /gb=X01697 /gi=53810 /ug=Mm.4539 /len=867 /STRA=for			50	50	1	#DIV/0!		1	1
100085_at	50	50	50	50		50	50	50	50	50	50	50	50		Mus musculus gamma-glutamyl transpeptidase (GGT) mRNA, complete cds /cds=(160,1866) /gb=U30509 /gi=1263191 /ug=Mm.4559 /len=2022 /STRA=for			50	50	1	#DIV/0!		1	1
100100_at	50	50	50	50		50	50	50	50	50	50	50	50		vv47h06.r1 Mus musculus cDNA, 5' end /clone=IMAGE-1225595 /clone_end=5' /gb=AA762212 /gi=2811959 /ug=Mm.46316 /len=509 /STRA=for			50	50	1	#DIV/0!		1	1
100109_s_at	50	50	50	50		50	50	50	50	50	50	50	50		Keratin complex 1, acidic, gene 13 /cds=(0,938) /gb=X03492 /gi=52782 /ug=Mm.4646 /len=1204 /STRA=for			50	50	1	#DIV/0!		1	1
100117_at	50	50	50	50		50	50	50	50	50	50	50	50		UI-M-BH2.2-aoo-f-02-0-UI.s1 Mus musculus cDNA, 3' end /clone=UI-M-BH2.2-aoo-f-02-0-UI /clone_end=3' /gb=AW122073 /gi=6097480 /ug=Mm.46716 /len=315 /STRA=for			50	50	1	#DIV/0!		1	1
100127_at	50	50	50	50		50	50	50	50	50	50	50	50		Cellular retinoic acid binding protein II /cds=(115,531) /gb=M35523 /gi=192705 /ug=Mm.4757 /len=868 /STRA=for			50	50	1	#DIV/0!		1	1
100131_at	50	50	50	50		50	50	50	50	50	50	50	50		Secretory granule neuroendocrine protein 1, 7B2 protein /cds=(78,716) /gb=X15830 /gi=49774 /ug=Mm.4836 /len=1155 /STRA=for			50	50	1	#DIV/0!		1	1
100139_at	50	50	50	50		50	50	50	50	50	50	50	50		UI-M-AL0-abo-f-12-0-UI.s1 Mus musculus cDNA, 3' end /clone=UI-M-AL0-abo-f-12-0-UI /clone_end=3' /gb=AI841733 /gi=5475946 /ug=Mm.4881 /len=285 /STRA=for			50	50	1	#DIV/0!		1	1
100143_at	50	50	50	50		50	50	50	50	50	50	50	50		M.musculus mRNA for zyxin /cds=(12,1706) /gb=Y07711 /gi=1524171 /ug=Mm.4895 /len=2166 /STRA=for			50	50	1	#DIV/0!		1	1
100149_at	50	50	50	50		50	50	50	50	50	50	50	50		Mouse mRNA for mMIS5, complete cds /cds=(91,2556) /gb=D86726 /gi=1498165 /ug=Mm.4933 /len=2901 /STRA=for			50	50	1	#DIV/0!		1	1
100150_f_at	50	50	50	50		50	50	50	50	50	50	50	50		Insulin II /cds=(17,349) /gb=X04724 /gi=52714 /ug=Mm.4946 /len=389 /STRA=for			50	50	1	#DIV/0!		1	1
100152_at	50	50	50	50		50	50	50	50	50	50	50	50		Neural cell adhesion molecule /cds=(0,76) /gb=X15050 /gi=53346 /ug=Mm.4974 /len=3054 /STRA=for			50	50	1	#DIV/0!		1	1
100272_at	50	50	50	50		50	50	50	50	50	50	50	50		Selected mouse cDNA on the Y /cds=(0,1694) /gb=Z29652 /gi=984671 /ug=Mm.1064 /len=1821 /STRA=for			50	50	1	#DIV/0!		1	1
100278_at	50	50	50	50		50	50	50	50	50	50	50	50		Mus musculus cyclin-dependent kinase inhibitor p27kip1 mRNA, complete cds /cds=(0,593) /gb=U09968 /gi=516545 /ug=Mm.8046 /len=594 /STRA=for			50	50	1	#DIV/0!		1	1
100279_at	50	50	50	50		50	50	50	50	50	50	50	50		M.musculus mRNA for gal beta 1,3 galNAc alpha 2,3-sialyltransferase /cds=(101,1153) /gb=X76989 /gi=475203 /ug=Mm.8047 /len=1189 /STRA=for			50	50	1	#DIV/0!		1	1
100284_at	50	50	50	50		50	50	50	50	50	50	50	50		Zinc finger protein of the cerebellum 4 /cds=(502,1563) /gb=D78174 /gi=1480004 /ug=Mm.8062 /len=1596 /STRA=for			50	50	1	#DIV/0!		1	1
100285_at	50	50	50	50		50	50	50	50	50	50	50	50		M.musculus (Balb/c) mRNA for collagen IV alpha 3 chain /cds=(0,740) /gb=Z35166 /gi=1359954 /ug=Mm.8069 /len=771 /STRA=for			50	50	1	#DIV/0!		1	1
100286_at	50	50	50	50		50	50	50	50	50	50	50	50		Mouse hepatocyte growth factor-like protein gene, complete cds /cds=(94,2244) /gb=M74180 /gi=193831 /ug=Mm.8369 /len=2310 /STRA=for			50	50	1	#DIV/0!		1	1
100287_at	50	50	50	50		50	50	50	50	50	50	50	50		Mus musculus mRNA for alpha4-b protein /cds=(0,1031) /gb=AJ010637 /gi=6273568 /ug=Mm.84043 /len=1374 /STRA=for			50	50	1	#DIV/0!		1	1
100294_at	50	50	50	50		50	50	50	50	50	50	50	50		Mus musculus mRNA for CAD, complete cds /cds=(0,1034) /gb=AB009377 /gi=3493350 /ug=Mm.86386 /len=1038 /STRA=for			50	50	1	#DIV/0!		1	1
100298_at	50	50	50	50		50	50	50	50	50	50	50	50		Mus musculus persephin mRNA, complete cds /cds=(0,470) /gb=AF040960 /gi=2935705 /ug=Mm.86487 /len=471 /STRA=rev			50	50	1	#DIV/0!		1	1
100299_f_at	50	50	50	50		50	50	50	50	50	50	50	50		Mus musculus anti-DNA immunoglobulin light chain IgM mRNA, antibody 363p.168, partial cds /cds=(0,297) /gb=U55576 /gi=1870267 /ug=Mm.86499 /len=298 /STRA=for			50	50	1	#DIV/0!		1	1
100301_at	50	50	50	50		50	50	50	50	50	50	50	50		M.musculus mRNA for estrogen receptor-related protein /cds=(42,1343) /gb=X89594 /gi=914855 /ug=Mm.86606 /len=1344 /STRA=for			50	50	1	#DIV/0!		1	1
100303_at	50	50	50	50		50	50	50	50	50	50	50	50		Histocompatibility 2, M region locus 10.1 /cds=(0,995) /gb=AF016309 /gi=2353321 /ug=Mm.86686 /len=996 /STRA=for			50	50	1	#DIV/0!		1	1
100305_g_at	50	50	50	50		50	50	50	50	50	50	50	50		mr82e08.x1 Mus musculus cDNA, 3' end /clone=IMAGE-603974 /clone_end=3' /gb=AI449957 /gi=4293637 /ug=Mm.86686 /len=437 /STRA=for			50	50	1	#DIV/0!		1	1
100309_at	50	50	50	50		50	50	50	50	50	50	50	50		Met proto-oncogene /cds=(0,4139) /gb=Y00671 /gi=53058 /ug=Mm.86844 /len=4140 /STRA=for			50	50	1	#DIV/0!		1	1
100311_f_at	50	50	50	50		50	50	50	50	50	50	50	50		Mus musculus eosinophil secondary granule ribonuclease-1 (mEAR-1) mRNA, complete cds /cds=(0,467) /gb=U72032 /gi=1695898 /ug=Mm.86948 /len=468 /STRA=for			50	50	1	#DIV/0!		1	1
100313_at	50	50	50	50		50	50	50	50	50	50	50	50		Mus musculus integrin alpha8 mRNA, partial cds /cds=(0,3038) /gb=AF041409 /gi=3098479 /ug=Mm.86983 /len=3039 /STRA=rev			50	50	1	#DIV/0!		1	1
100314_f_at	50	50	50	50		50	50	50	50	50	50	50	50		UI-M-AL0-abv-a-08-0-UI.s1 Mus musculus cDNA, 3' end /clone=UI-M-AL0-abv-a-08-0-UI /clone_end=3' /gb=AI838036 /gi=5472249 /ug=Mm.86983 /len=369 /STRA=rev			50	50	1	#DIV/0!		1	1
100315_at	50	50	50	50		50	50	50	50	50	50	50	50		Mus musculus chromaffin granule ATPase II homolog mRNA, complete cds /cds=(0,3449) /gb=U75321 /gi=1663647 /ug=Mm.87029 /len=3450 /STRA=for			50	50	1	#DIV/0!		1	1
100317_at	50	50	50	50		50	50	50	50	50	50	50	50		Mus musculus protein phosphatase with EF-hands-2 (PPEF-2) mRNA, complete cds /cds=(0,2273) /gb=AF023458 /gi=2586416 /ug=Mm.87155 /len=2274 /STRA=for			50	50	1	#DIV/0!		1	1
100321_f_at	50	50	50	50		50	50	50	50	50	50	50	50		EST02104 Mus musculus cDNA, 5' end /clone=C0017F03 /clone_end=5' /gb=AA407120 /gi=2067019 /ug=Mm.87656 /len=359 /STRA=for			50	50	1	#DIV/0!		1	1
100325_at	50	50	50	50		50	50	50	50	50	50	50	50		Glycoprotein 49 A /cds=(41,952) /gb=M65027 /gi=192796 /ug=Mm.87772 /len=1305 /STRA=for			50	50	1	#DIV/0!		1	1
100330_at	50	50	50	50		50	50	50	50	50	50	50	50		Mus musculus type II peroxiredoxin protein 2 (PrxII-2) pseudogene, complete sequence /cds=(0,596) /gb=AF032714 /gi=3603231 /ug=Mm.87831 /len=597 /STRA=for			50	50	1	#DIV/0!		1	1
100334_f_at	50	50	50	50		50	50	50	50	50	50	50	50		Epidermal growth factor binding protein type B /cds=(0,785) /gb=X58628 /gi=53771 /ug=Mm.87852 /len=786 /STRA=for			50	50	1	#DIV/0!		1	1
100337_at	50	50	50	50		50	50	50	50	50	50	50	50		Calcium channel, voltage-dependent, L type, alpha 1D subunit /cds=(602,7420) /gb=L29346 /gi=522330 /ug=Mm.87861 /len=9864 /STRA=for			50	50	1	#DIV/0!		1	1
100338_s_at	50	50	50	50		50	50	50	50	50	50	50	50		Mus musculus domesticus alpha1E calcium channel (Cchra1) gene, partial cds /cds=(839,1105) /gb=AF042066 /gi=3399772 /ug=Mm.87861 /len=1106 /STRA=for			50	50	1	#DIV/0!		1	1
100340_at	50	50	50	50		50	50	50	50	50	50	50	50		Mus musculus Na/taurocholate cotransporting polypeptide 2 (Ntcp) mRNA, alternatively spliced, complete cds /cds=(40,993) /gb=U95132 /gi=2522349 /ug=Mm.87938 /len=1411 /STRA=for			50	50	1	#DIV/0!		1	1
100341_g_at	50	50	50	50		50	50	50	50	50	50	50	50		Mus musculus Na/taurocholate cotransporting polypeptide 2 (Ntcp) mRNA, alternatively spliced, complete cds /cds=(40,993) /gb=U95132 /gi=2522349 /ug=Mm.87938 /len=1411 /STRA=for			50	50	1	#DIV/0!		1	1
100346_at	50	50	50	50		50	50	50	50	50	50	50	50		Fibroblast growth factor 9 /cds=(138,764) /gb=U33535 /gi=1161346 /ug=Mm.8846 /len=837 /STRA=for			50	50	1	#DIV/0!		1	1
100347_at	50	50	50	50		50	50	50	50	50	50	50	50		ms17a10.r1 Mus musculus cDNA, 5' end /clone=IMAGE-607194 /clone_end=5' /gb=AA154606 /gi=1726235 /ug=Mm.885 /len=270 /STRA=rev			50	50	1	#DIV/0!		1	1
100350_at	50	50	50	50		50	50	50	50	50	50	50	50		C80925 Mus musculus cDNA, 3' end /clone=J0090G05 /clone_end=3' /gb=C80925 /gi=2521255 /ug=Mm.88716 /len=653 /STRA=rev			50	50	1	#DIV/0!		1	1
100354_at	50	50	50	50		50	50	50	50	50	50	50	50		Mus musculus putative transcriptional regulator (MmTbx14) mRNA, partial cds /cds=(473,2152) /gb=AF013282 /gi=3128381 /ug=Mm.88761 /len=2480 /STRA=rev			50	50	1	#DIV/0!		1	1
100356_at	50	50	50	50		50	50	50	50	50	50	50	50		UI-M-BH2.3-aof-d-02-0-UI.s1 Mus musculus cDNA, 3' end /clone=UI-M-BH2.3-aof-d-02-0-UI /clone_end=3' /gb=AW121051 /gi=6096384 /ug=Mm.88761 /len=365 /STRA=for			50	50	1	#DIV/0!		1	1
100359_at	50	50	50	50		50	50	50	50	50	50	50	50		T-complex protein-10 complex /cds=(0,119) /gb=M22602 /gi=201739 /ug=Mm.88781 /len=752 /STRA=for			50	50	1	#DIV/0!		1	1
100361_f_at	50	50	50	50		50	50	50	50	50	50	50	50		Mouse Ig rearranged truncated mu-chain mRNA D-J3 region, 5' end /cds=(23,134) /gb=M30207 /gi=195769 /ug=Mm.88801 /len=135 /STRA=for			50	50	1	#DIV/0!		1	1
100363_at	50	50	50	50		50	50	50	50	50	50	50	50		Mus musculus mRNA for synaptotagmin V, complete cds /cds=(12,1487) /gb=AB026802 /gi=6136781 /ug=Mm.88817 /len=1488 /STRA=for			50	50	1	#DIV/0!		1	1
100364_at	50	50	50	50		50	50	50	50	50	50	50	50		Mus musculus mRNA for synaptotagmin VI, complete cds /cds=(0,1535) /gb=AB026803 /gi=6136783 /ug=Mm.88818 /len=1544 /STRA=for			50	50	1	#DIV/0!		1	1
100368_at	50	50	50	50		50	50	50	50	50	50	50	50		Mus musculus mRNA for caspase9S, complete cds /cds=(0,1181) /gb=AB019601 /gi=6440947 /ug=Mm.88829 /len=1255 /STRA=for			50	50	1	#DIV/0!		1	1
100369_at	50	50	50	50		50	50	50	50	50	50	50	50		Mus musculus ST6GalNAc VI mRNA for N-acetylgalactosaminide alpha2,6-sialyltransferase, partial cds /cds=(0,887) /gb=AB035174 /gi=6468230 /ug=Mm.88831 /len=888 /STRA=for			50	50	1	#DIV/0!		1	1
100372_at	50	50	50	50		50	50	50	50	50	50	50	50		Mouse mRNA for GABA(A) receptor gamma-1 subunit /cds=UNKNOWN /gb=X55272 /gi=5804938 /ug=Mm.88838 /len=1995 /STRA=for			50	50	1	#DIV/0!		1	1
100374_at	50	50	50	50		50	50	50	50	50	50	50	50		Mus musculus Doublesex related transcript (Dmrt1) /cds=(151,1275) /gb=AL133300 /gi=6522828 /ug=Mm.88852 /len=2247 /STRA=for			50	50	1	#DIV/0!		1	1
100375_i_at	50	50	50	50		50	50	50	50	50	50	50	50		Mus musculus clone BHS2.19 immunoglobulin heavy chain variable region precursor gene, partial cds /cds=(48,356) /gb=AF025445 /gi=2653851 /ug=Mm.88853 /len=357 /STRA=for			50	50	1	#DIV/0!		1	1
100377_f_at	50	50	50	50		50	50	50	50	50	50	50	50		Mus musculus clone BPS3.24 germline Ig variable region heavy chain precursor gene, partial cds /cds=(0,308) /gb=L33952 /gi=2702227 /ug=Mm.88856 /len=309 /STRA=for			50	50	1	#DIV/0!		1	1
100378_at	50	50	50	50		50	50	50	50	50	50	50	50		vd58e01.x1 Mus musculus cDNA, 3' end /clone=IMAGE-804792 /clone_end=3' /gb=AI467488 /gi=4320825 /ug=Mm.88881 /len=426 /STRA=rev			50	50	1	#DIV/0!		1	1
100382_at	50	50	50	50		50	50	50	50	50	50	50	50		M.musculus mRNA for GalNAc alpha-2,6-sialyltransferase I /cds=(105,1685) /gb=Y11274 /gi=6491774 /ug=Mm.89194 /len=2400 /STRA=for			50	50	1	#DIV/0!		1	1
100383_at	50	50	50	50		50	50	50	50	50	50	50	50		Zinc finger protein 179 /cds=(33,977) /gb=AB013097 /gi=3834363 /ug=Mm.89201 /len=1928 /STRA=for			50	50	1	#DIV/0!		1	1
100384_at	50	50	50	50		50	50	50	50	50	50	50	50		Mus musculus mRNA for transcription factor HSF4b isoform, complete cds /cds=(5,1483) /gb=AB029349 /gi=5921136 /ug=Mm.89204 /len=1686 /STRA=rev			50	50	1	#DIV/0!		1	1
100388_at	50	50	50	50		50	50	50	50	50	50	66	50		Mus musculus GTP-binding protein alpha-o subunit gene, 5' end /cds=(753,757) /gb=L34216 /gi=1220406 /ug=Mm.89472 /len=758 /STRA=for			50	50	1	#DIV/0!		1	1.32
100390_s_at	50	50	50	50		50	50	50	50	50	50	50	50		Beaded filament structural protein in lens-CP94 /cds=(12,2021) /gb=AB003147 /gi=2754579 /ug=Mm.8971 /len=2159 /STRA=for			50	50	1	#DIV/0!		1	1
100391_at	50	50	50	50		50	50	50	50	50	50	50	50		Mus musculus mRNA for JNK1, complete cds /cds=(24,1178) /gb=AB005663 /gi=6141550 /ug=Mm.89839 /len=1197 /STRA=rev			50	50	1	#DIV/0!		1	1
100394_at	50	50	50	50		50	50	50	50	50	50	50	70		Mus musculus mRNA for podocalyxin-like protein 1, complete cds /cds=(170,1681) /gb=AB028048 /gi=6448470 /ug=Mm.89918 /len=2131 /STRA=for			50	50	1	#DIV/0!		1.4	1
100396_i_at	50	50	50	50		50	50	50	50	50	50	50	50		Mouse thymidylate synthase pseudogene mRNA, complete cds /cds=UNKNOWN /gb=M30774 /gi=200561 /ug=Mm.89931 /len=1349 /STRA=for			50	50	1	#DIV/0!		1	1
100397_at	50	50	50	50		50	50	50	50	50	50	50	50		TYRO protein tyrosine kinase binding protein /cds=(0,344) /gb=AF024637 /gi=2906001 /ug=Mm.46301 /len=345 /STRA=for			50	50	1	#DIV/0!		1	1
100398_at	50	50	50	50		50	50	50	50	50	50	50	50		Kinesin family member 3a /cds=(133,2238) /gb=D12645 /gi=220469 /ug=Mm.4635 /len=2282 /STRA=for			50	50	1	#DIV/0!		1	1
100402_f_at	50	50	50	50		50	50	50	50	50	50	50	50		Mus musculus sperm fertilization protein sp56 precursor (SP56) mRNA, complete cds /cds=(79,1818) /gb=U17108 /gi=897562 /ug=Mm.4644 /len=2026 /STRA=for			50	50	1	#DIV/0!		1	1
100403_at	50	50	50	50		50	50	50	50	50	50	50	50		vw65f04.r1 Mus musculus cDNA, 5' end /clone=IMAGE-1259839 /clone_end=5' /gb=AA839903 /gi=2916497 /ug=Mm.46514 /len=250 /STRA=for			50	50	1	#DIV/0!		1	1
100406_at	50	50	50	50		50	50	50	50	50	50	50	50		Protein tyrosine phosphatase, non-receptor type 5 /cds=(492,2117) /gb=U28217 /gi=915381 /ug=Mm.4654 /len=3141 /STRA=for			50	50	1	#DIV/0!		1	1
100411_at	50	50	50	50		50	50	50	50	50	50	50	50		Mus musculus aortic carboxypeptidase-like protein ACLP mRNA, complete cds /cds=(202,3588) /gb=AF053943 /gi=3288913 /ug=Mm.4665 /len=3790 /STRA=for			50	50	1	#DIV/0!		1	1
100414_s_at	50	50	50	50		50	50	50	50	50	50	50	50		Myeloperoxidase /cds=(504,2660) /gb=X15313 /gi=53203 /ug=Mm.4668 /len=2740 /STRA=for			50	50	1	#DIV/0!		1	1
100416_at	50	50	50	50		50	50	50	50	50	50	50	50		Maternal embryonic leucine zipper kinase /cds=(125,2056) /gb=L76158 /gi=1479987 /ug=Mm.4674 /len=2060 /STRA=for			50	50	1	#DIV/0!		1	1
100420_at	50	50	50	50		50	50	50	50	50	50	50	50		Filaggrin /cds=(0,1010) /gb=J03458 /gi=193307 /ug=Mm.4685 /len=1488 /STRA=for			50	50	1	#DIV/0!		1	1
100426_s_at	50	50	50	50		50	50	50	50	50	50	50	50		Spleen tyrosine kinase /cds=(219,2108) /gb=U36776 /gi=1041782 /ug=Mm.4708 /len=2290 /STRA=for			50	50	1	#DIV/0!		1	1
100427_at	50	50	50	50		50	50	50	50	50	50	50	50		Protein tyrosine phosphatase, receptor type, O /cds=(380,1597) /gb=U37465 /gi=1063639 /ug=Mm.4715 /len=2760 /STRA=rev			50	50	1	#DIV/0!		1	1
100430_at	50	50	50	50		50	50	50	50	50	50	50	50		Mus musculus mRNA for leptin receptor B, New Zealand Obese strain /cds=(8,3496) /gb=Y10298 /gi=4038611 /ug=Mm.4756 /len=3499 /STRA=for			50	50	1	#DIV/0!		1	1
100431_at	50	50	50	50		50	50	50	50	50	50	50	50		Leptin receptor /cds=(60,2744) /gb=U42467 /gi=1139592 /ug=Mm.4756 /len=4560 /STRA=for			50	50	1	#DIV/0!		1	1
100434_s_at	50	50	50	50		50	50	50	50	50	50	50	50		MyoD family inhibitor /cds=(210,701) /gb=U57822 /gi=1545987 /ug=Mm.4763 /len=1089 /STRA=for			50	50	1	#DIV/0!		1	1
100436_at	50	50	50	50		50	50	50	50	50	50	50	50		Orosomucoid 1 /cds=(32,655) /gb=M27008 /gi=531206 /ug=Mm.4777 /len=768 /STRA=for			50	50	1	#DIV/0!		1	1
100437_g_at	50	50	50	50		50	50	50	50	50	50	50	50		Orosomucoid 1 /cds=(32,655) /gb=M27008 /gi=531206 /ug=Mm.4777 /len=768 /STRA=for			50	50	1	#DIV/0!		1	1
100441_s_at	50	50	50	50		50	50	50	50	50	50	50	50		Ankyrin 1, erythroid /cds=(0,731) /gb=X69064 /gi=311818 /ug=Mm.4789 /len=1704 /STRA=for			50	50	1	#DIV/0!		1	1
100445_f_at	50	50	50	50		50	50	50	50	50	50	50	50		M.musculus mRNA for SPRR1b protein /cds=(45,506) /gb=X91825 /gi=1213026 /ug=Mm.4826 /len=688 /STRA=for			50	50	1	#DIV/0!		1	1
100454_at	50	50	50	50		50	50	50	50	50	50	50	50		Mus musculus mRNA for Ftp-1, complete cds /cds=(113,4423) /gb=D88187 /gi=2627026 /ug=Mm.4860 /len=5464 /STRA=for			50	50	1	#DIV/0!		1	1
100455_at	50	50	50	50		50	50	50	50	50	50	50	50		Mouse phosphoprotein (F1-20) mRNA, complete cds /cds=(144,2849) /gb=M83985 /gi=193208 /ug=Mm.4870 /len=4260 /STRA=for			50	50	1	#DIV/0!		1	1
100463_at	50	50	50	50		50	50	50	50	50	50	50	50		Casein gamma /cds=(56,610) /gb=D10215 /gi=220404 /ug=Mm.4908 /len=920 /STRA=rev			50	50	1	#DIV/0!		1	1
100467_at	50	50	50	50		50	50	50	50	50	50	50	50		M.musculus LYL gene (clone L6) /cds=(465,1301) /gb=X57687 /gi=52965 /ug=Mm.4925 /len=1686 /STRA=for			50	50	1	#DIV/0!		1	1
100468_g_at	50	50	50	50		50	50	50	50	50	50	50	50		M.musculus LYL gene (clone L6) /cds=(465,1301) /gb=X57687 /gi=52965 /ug=Mm.4925 /len=1686 /STRA=for			50	50	1	#DIV/0!		1	1
100474_at	50	50	50	50		50	50	50	50	50	50	50	50		M.musculus gene encoding polysialic acid synthase, exon 1 and joined CDS /cds=(0,1127) /gb=X99646 /gi=2275038 /ug=Mm.4954 /len=1128 /STRA=for			50	50	1	#DIV/0!		1	1
100476_at	50	50	50	50		50	50	50	50	50	50	50	50		Integrin binding sialoprotein /cds=(63,1037) /gb=L20232 /gi=309321 /ug=Mm.4987 /len=1059 /STRA=for			50	50	1	#DIV/0!		1	1
100479_at	50	50	50	50		50	50	50	50	50	50	50	50		vv58e04.r1 Mus musculus cDNA, 5' end /clone=IMAGE-1226622 /clone_end=5' /gb=AA756653 /gi=2803851 /ug=Mm.5001 /len=393 /STRA=for			50	50	1	#DIV/0!		1	1
100481_at	50	50	50	50		50	50	50	50	50	50	50	50		Procollagen, type XI, alpha 1 /cds=(175,5589) /gb=D38162 /gi=1212743 /ug=Mm.5017 /len=7057 /STRA=for			50	50	1	#DIV/0!		1	1
100484_at	50	50	50	50		50	50	50	50	50	50	50	50		Matrix metalloproteinase 1 /cds=(10,1428) /gb=X66473 /gi=53603 /ug=Mm.5022 /len=2660 /STRA=for			50	50	1	#DIV/0!		1	1
100491_at	50	50	50	50		50	50	50	50	50	50	50	50		Solute carrier family 16 (monocarboxylic acid transporters), member 2 /cds=(174,1871) /gb=AF045692 /gi=2944355 /ug=Mm.5045 /len=4247 /STRA=for			50	50	1	#DIV/0!		1	1
100493_at	50	50	50	50		50	50	50	50	50	50	50	50		M.musculus DNA for hsd11b2 gene exons 2 to 5 /cds=(0,925) /gb=X90647 /gi=949903 /ug=Mm.5079 /len=1414 /STRA=for			50	50	1	#DIV/0!		1	1
100494_at	50	50	50	50		50	50	50	50	50	50	50	50		Fibroblast growth factor 1 /cds=(0,467) /gb=M30641 /gi=193284 /ug=Mm.5087 /len=468 /STRA=for			50	50	1	#DIV/0!		1	1
100497_at	50	50	50	50		50	50	50	50	50	50	50	50		Mouse mRNA for syntaxin 3D-2, complete cds /cds=(0,260) /gb=D38375 /gi=924275 /ug=Mm.5122 /len=261 /STRA=for			50	50	1	#DIV/0!		1	1
100501_at	50	50	50	50		50	50	50	50	50	50	50	50		ATPase, H+/K+ transporting, beta polypeptide, gastric specific /cds=(25,909) /gb=M80251 /gi=192087 /ug=Mm.5144 /len=1327 /STRA=for			50	50	1	#DIV/0!		1	1
100502_at	50	50	50	50		50	50	50	50	50	50	50	50		Mus musculus calmodulin-dependent cyclic nucleotide phosphodiesterase (pde1c) mRNA, complete cds /cds=(10,1974) /gb=L76947 /gi=1228030 /ug=Mm.5145 /len=2087 /STRA=for			50	50	1	#DIV/0!		1	1
100505_at	50	50	50	50		50	50	50	50	50	50	50	50		Mus musculus rin mRNA, complete cds /cds=(143,796) /gb=U71202 /gi=1655998 /ug=Mm.5163 /len=1762 /STRA=for			50	50	1	#DIV/0!		1	1
100507_at	50	50	50	50		50	50	50	50	50	50	50	50		M.musculus mRNA for NOV protein /cds=(32,1096) /gb=Y09257 /gi=1666472 /ug=Mm.5167 /len=2364 /STRA=for			50	50	1	#DIV/0!		1	1
100511_at	50	50	50	50		50	50	50	50	50	50	50	50		ud30f12.r1 Mus musculus cDNA, 5' end /clone=IMAGE-1447439 /clone_end=5' /gb=AI154249 /gi=3682718 /ug=Mm.5202 /len=359 /STRA=for			50	50	1	#DIV/0!		1	1
100518_at	50	50	50	50		50	50	50	50	50	50	50	50		Mus musculus mRNA for ARF2, complete cds /cds=(75,620) /gb=D87899 /gi=1565208 /ug=Mm.5061 /len=1155 /STRA=for			50	50	1	#DIV/0!		1	1
100526_f_at	50	50	50	50		50	50	50	50	50	50	50	55		Cyritestin 1 /cds=(72,2540) /gb=X64227 /gi=1666650 /ug=Mm.5168 /len=2722 /STRA=for			50	50	1	#DIV/0!		1.1	1
100536_at	50	50	50	50		50	50	50	50	50	50	50	50		UI-M-AN0-acp-b-01-0-UI.s1 Mus musculus cDNA, 3' end /clone=UI-M-AN0-acp-b-01-0-UI /clone_end=3' /gb=AI839662 /gi=5473875 /ug=Mm.5259 /len=154 /STRA=for			50	50	1	#DIV/0!		1	1
100537_at	50	50	50	50		50	50	50	50	50	50	50	50		UI-M-AI0-aak-d-09-0-UI.s1 Mus musculus cDNA, 3' end /clone=UI-M-AI0-aak-d-09-0-UI /clone_end=3' /gb=AI836443 /gi=5470656 /ug=Mm.5265 /len=240 /STRA=for			50	50	1	#DIV/0!		1	1
100542_at	50	50	50	50		50	50	50	50	50	50	50	50		Mus musculus meprin A alpha subunit (Mep1a) gene, partial cds /cds=(0,591) /gb=U62765 /gi=2108049 /ug=Mm.5346 /len=592 /STRA=for			50	50	1	#DIV/0!		1	1
100546_at	50	50	50	50		50	50	50	50	50	50	50	50		Mus musculus Mlark mRNA, complete cds /cds=(69,1172) /gb=U89506 /gi=2078530 /ug=Mm.542 /len=1617 /STRA=for			50	50	1	#DIV/0!		1	1
100548_at	50	50	50	50		50	50	50	50	50	50	50	50		Mus musculus (clone- pMAT1) mRNA, complete cds /cds=(961,1146) /gb=L31958 /gi=473909 /ug=Mm.544 /len=1770 /STRA=for			50	50	1	#DIV/0!		1	1
100551_r_at	50	50	50	50		50	50	50	50	50	50	50	50		UI-M-BH1-anj-c-07-0-UI.s1 Mus musculus cDNA, 3' end /clone=UI-M-BH1-anj-c-07-0-UI /clone_end=3' /gb=AW060422 /gi=6008173 /ug=Mm.548 /len=373 /STRA=for			50	50	1	#DIV/0!		1	1
100556_at	50	50	50	50		50	50	50	50	50	50	50	50		UI-M-BH2.3-aoj-d-12-0-UI.s1 Mus musculus cDNA, 3' end /clone=UI-M-BH2.3-aoj-d-12-0-UI /clone_end=3' /gb=AW121930 /gi=6097374 /ug=Mm.5612 /len=467 /STRA=for			50	50	1	#DIV/0!		1	1
100558_at	50	50	50	50		50	50	50	50	50	50	50	50		UI-M-BH1-amv-a-02-0-UI.s1 Mus musculus cDNA, 3' end /clone=UI-M-BH1-amv-a-02-0-UI /clone_end=3' /gb=AW060241 /gi=6007992 /ug=Mm.5612 /len=516 /STRA=for			50	50	1	#DIV/0!		1	1
100566_at	50	50	50	50		50	50	50	50	50	50	50	50		Insulin-like growth factor binding protein 5 /cds=(387,1202) /gb=L12447 /gi=425405 /ug=Mm.578 /len=5561 /STRA=for			50	50	1	#DIV/0!		1	1
100585_at	50	50	50	50		50	50	50	50	50	50	50	50		Mus musculus chromatin structural protein homolog (Supt4h) gene, complete cds /cds=(35,388) /gb=U96809 /gi=3779193 /ug=Mm.622 /len=693 /STRA=for			50	50	1	#DIV/0!		1	1
100596_at	50	50	50	50		50	50	50	50	50	50	50	50		Selenium binding protein 1 /cds=(59,1477) /gb=M32032 /gi=200951 /ug=Mm.636 /len=1622 /STRA=for			50	50	1	#DIV/0!		1	1
100602_at	50	50	50	50		50	50	50	50	50	50	50	50		Mouse insulinoma (rig) mRNA, complete cds /cds=(30,467) /gb=M33330 /gi=200750 /ug=Mm.643 /len=500 /STRA=for			50	50	1	#DIV/0!		1	1
100611_at	50	50	50	50		50	50	50	50	50	50	50	50		Mouse lysozyme M gene /cds=(30,476) /gb=M21050 /gi=198950 /ug=Mm.654 /len=1264 /STRA=for			50	50	1	#DIV/0!		1	1
100614_at	50	50	50	50		50	50	50	50	50	50	50	50		Myoglobin /cds=(0,464) /gb=X04405 /gi=53305 /ug=Mm.657 /len=902 /STRA=for			50	50	1	#DIV/0!		1	1
100615_at	50	50	50	50		50	50	50	50	50	50	50	50		Myoglobin /cds=(0,299) /gb=X04405 /gi=53305 /ug=Mm.657 /len=300 /STRA=for			50	50	1	#DIV/0!		1	1
100620_at	50	50	50	50		50	50	50	50	50	50	50	50		Mouse mRNA for 4-hydroxyphenylpyruvate dioxygenase, complete cds /cds=(48,1229) /gb=D29987 /gi=849052 /ug=Mm.6584 /len=1399 /STRA=rev			50	50	1	#DIV/0!		1	1
100623_at	50	50	50	50		50	50	50	50	50	50	50	50		Mus musculus gob-5 mRNA, complete cds /cds=(14,2755) /gb=AB017156 /gi=3721911 /ug=Mm.6594 /len=2937 /STRA=for			50	50	1	#DIV/0!		1	1
100626_at	50	50	50	50		50	50	50	50	50	50	50	50		Mus musculus outer dense fiber 2 (Odf2) mRNA, complete cds /cds=(317,2233) /gb=AF034105 /gi=2645883 /ug=Mm.663 /len=2354 /STRA=for			50	50	1	#DIV/0!		1	1
100634_at	50	50	50	50		50	50	50	50	50	50	50	50		Mus musculus short-chain dehydrogenase CRAD2 mRNA, complete cds /cds=(97,1047) /gb=AF056194 /gi=3294554 /ug=Mm.6696 /len=1612 /STRA=for			50	50	1	#DIV/0!		1	1
100669_at	50	50	50	50		50	50	50	50	50	50	50	50		Interleukin 17 /cds=(11,463) /gb=L13839 /gi=293329 /ug=Mm.14088 /len=1080 /STRA=for			50	50	1	#DIV/0!		1	1
100670_at	50	50	50	50		50	50	50	50	50	50	50	50		Mus musculus sodium channel 25 mRNA, complete cds /cds=(21,950) /gb=L42338 /gi=825472 /ug=Mm.14100 /len=1362 /STRA=for			50	50	1	#DIV/0!		1	1
100671_at	50	50	50	50		50	50	50	50	50	50	50	50		Interferon alpha family, gene 11 /cds=(66,638) /gb=M68944 /gi=194094 /ug=Mm.14102 /len=1482 /STRA=for			50	50	1	#DIV/0!		1	1
100672_at	50	50	50	50		50	50	50	50	50	50	50	50		Mouse dilute lethal-20J (d-l20J) deletion breakpoint fusion fragment /cds=(0,153) /gb=M33467 /gi=200977 /ug=Mm.14108 /len=203 /STRA=for			50	50	1	#DIV/0!		1	1
100673_f_at	50	50	50	50		50	50	50	50	50	50	50	50		Killer cell lectin-like receptor, subfamily A, member 5 /cds=(108,908) /gb=U10091 /gi=533489 /ug=Mm.14111 /len=1157 /STRA=for			50	50	1	#DIV/0!		1	1
100674_f_at	50	50	50	50		50	50	50	50	50	50	50	50		Killer cell lectin-like receptor, subfamily A, member 6 /cds=(80,880) /gb=U10092 /gi=533491 /ug=Mm.14112 /len=1117 /STRA=for			50	50	1	#DIV/0!		1	1
100675_at	50	50	50	50		50	50	50	50	50	50	50	50		Gamma-aminobutyric acid (GABA-A) receptor, subunit rho 1 /cds=(116,1540) /gb=AF024620 /gi=2565312 /ug=Mm.14116 /len=2286 /STRA=for			50	50	1	#DIV/0!		1	1
100676_at	50	50	50	50		50	50	50	50	50	50	50	50		Synaptojanin 2 /cds=(0,3621) /gb=AF026123 /gi=3478620 /ug=Mm.14117 /len=4884 /STRA=for			50	50	1	#DIV/0!		1	1
100677_f_at	50	50	50	50		50	50	50	50	50	50	50	50		Mus musculus putative pheromone receptor (VR9) mRNA, complete cds /cds=(79,1389) /gb=AF011419 /gi=2367467 /ug=Mm.14118 /len=2734 /STRA=for			50	50	1	#DIV/0!		1	1
100678_s_at	50	50	50	50		50	50	50	50	50	50	50	50		Mus musculus putative pheromone receptor (VR3) mRNA, partial cds /cds=(0,2411) /gb=AF011413 /gi=2367455 /ug=Mm.14119 /len=2907 /STRA=for			50	50	1	#DIV/0!		1	1
100679_at	50	50	50	50		50	50	50	50	50	50	50	50		Mus musculus putative pheromone receptor (VR16) mRNA, complete cds /cds=(35,265) /gb=AF011426 /gi=2367481 /ug=Mm.14121 /len=3896 /STRA=for			50	50	1	#DIV/0!		1	1
100682_f_at	50	50	50	50		50	50	50	50	50	50	54	50		Mus musculus immunoglobulin heavy and light chain variable region mRNA, complete cds /cds=(0,719) /gb=U62386 /gi=1480721 /ug=Mm.14141 /len=720 /STRA=for			50	50	1	#DIV/0!		1	1.08
100689_at	50	50	50	50		50	50	50	50	50	50	50	50		Seminal vesicle protein 2 /cds=(0,328) /gb=M35732 /gi=201101 /ug=Mm.1286 /len=541 /STRA=for			50	50	1	#DIV/0!		1	1
100691_at	50	50	50	50		50	50	50	50	50	50	50	50		Mus musculus sodium channel 21 mRNA, complete cds /cds=(910,1779) /gb=L42337 /gi=825470 /ug=Mm.1309 /len=3494 /STRA=for			50	50	1	#DIV/0!		1	1
100692_at	50	50	50	50		50	50	50	50	50	50	50	50		M.musculus RNA for 18.8 family from nasopharyngeal carcinoma tumour /cds=UNKNOWN /gb=X16301 /gi=50759 /ug=Mm.1340 /len=1419 /STRA=for			50	50	1	#DIV/0!		1	1
100695_at	50	50	50	50		50	50	50	50	50	50	50	50		Mouse mRNA for vasoactive intestinal contractor /cds=(77,559) /gb=X59556 /gi=55288 /ug=Mm.1366 /len=1234 /STRA=for			50	50	1	#DIV/0!		1	1
100697_at	50	50	50	50		50	50	50	50	50	50	54	50		Paired box gene 3 /cds=(297,1736) /gb=X59358 /gi=53591 /ug=Mm.1371 /len=2347 /STRA=for			50	50	1	#DIV/0!		1	1.08
100698_at	50	50	50	50		50	50	50	50	50	50	50	50		Paired like homeodomain factor 1 /cds=(228,899) /gb=U77946 /gi=1737207 /ug=Mm.1386 /len=1000 /STRA=for			50	50	1	#DIV/0!		1	1
100699_at	50	50	50	50		50	50	50	50	50	50	50	50		Mus musculus nuclear protein NIP45 mRNA, complete cds /cds=(12,1250) /gb=U76759 /gi=1747518 /ug=Mm.1389 /len=1946 /STRA=for			50	50	1	#DIV/0!		1	1
100701_r_at	50	50	50	50		50	50	50	50	50	50	50	50		Mouse mRNA for ELP3, complete cds /cds=(245,1636) /gb=AB000490 /gi=1805352 /ug=Mm.1416 /len=2981 /STRA=for			50	50	1	#DIV/0!		1	1
100703_at	50	50	50	50		50	50	50	50	50	50	50	50		Neuropeptide Y receptor Y2 /cds=(276,1433) /gb=D86238 /gi=1827495 /ug=Mm.1433 /len=3379 /STRA=for			50	50	1	#DIV/0!		1	1
100704_at	50	50	50	50		50	50	50	50	50	50	50	50		MUSGS00767 Mus musculus cDNA, 3' end /clone=mb1508 /clone_end=3' /gb=D19397 /gi=1089228 /ug=Mm.1505 /len=178 /STRA=rev			50	50	1	#DIV/0!		1	1
100705_at	50	50	50	50		50	50	50	50	50	50	50	50		Mouse luteinizing hormone receptor mRNA /cds=(5,2107) /gb=M81310 /gi=198811 /ug=Mm.1644 /len=2569 /STRA=for			50	50	1	#DIV/0!		1	1
100709_at	50	50	50	50		50	50	50	50	50	50	50	50		Trophoblast specific protein /cds=(75,449) /gb=X17071 /gi=55031 /ug=Mm.2372 /len=707 /STRA=for			50	50	1	#DIV/0!		1	1
100712_at	50	50	50	50		50	50	50	50	50	50	50	50		Neuronal PAS domain protein 1 /cds=(60,1844) /gb=U77967 /gi=1840053 /ug=Mm.2525 /len=1965 /STRA=for			50	50	1	#DIV/0!		1	1
100713_at	50	50	50	50		50	50	50	50	50	50	50	50		Mus musculus mRNA for Zinc finger protein s11-6, complete cds /cds=(106,1869) /gb=AB020542 /gi=3953592 /ug=Mm.28510 /len=2363 /STRA=for			50	50	1	#DIV/0!		1	1
100714_at	50	50	50	50		50	50	50	50	50	50	50	50		Bagpipe homeobox gene 1 homolog (Drosophila) /cds=(276,1277) /gb=U87957 /gi=1843591 /ug=Mm.2530 /len=1725 /STRA=for			50	50	1	#DIV/0!		1	1
100715_at	50	50	50	50		50	50	50	50	50	50	50	50		Mus musculus prostate secretory protein (PSP94) mRNA, complete cds /cds=(17,358) /gb=U89840 /gi=1888546 /ug=Mm.2540 /len=490 /STRA=for			50	50	1	#DIV/0!		1	1
100719_f_at	50	50	50	50		50	50	50	50	50	50	50	50		Mouse gamma-renin mRNA, complete cds /cds=(553,1338) /gb=J03877 /gi=200699 /ug=Mm.19214 /len=1382 /STRA=for			50	50	1	#DIV/0!		1	1
100722_r_at	50	50	50	50		50	50	50	50	50	50	50	50		Mus musculus recombinant antineuraminidase single chain Ig VH and VL domains mRNA, complete cds /cds=(0,821) /gb=U10410 /gi=501093 /ug=Mm.19353 /len=831 /STRA=for			50	50	1	#DIV/0!		1	1
100725_at	50	50	50	50		50	50	50	50	50	50	50	50		Mouse NAD(P)H menadione oxidoreductase mRNA, complete cds /cds=(74,898) /gb=M36660 /gi=200083 /ug=Mm.2881 /len=1501 /STRA=for			50	50	1	#DIV/0!		1	1
100726_at	50	50	50	50		50	50	50	50	50	50	50	50		Glutamate receptor, ionotropic, NMDA2A (epsilon 1) /cds=(0,4394) /gb=D10217 /gi=220410 /ug=Mm.2953 /len=4512 /STRA=for			50	50	1	#DIV/0!		1	1
100730_at	50	50	50	50		50	50	50	50	50	50	50	50		Lymphocyte antigen 78 /cds=(112,2097) /gb=D37797 /gi=761711 /ug=Mm.3300 /len=2620 /STRA=for			50	50	1	#DIV/0!		1	1
100731_at	50	50	50	50		50	50	50	50	50	50	50	50		Mouse 15-kDa proline-rich salivary protein mRNA, complete cds of clone pMP1 /cds=(30,473) /gb=M11900 /gi=200538 /ug=Mm.3320 /len=587 /STRA=for			50	50	1	#DIV/0!		1	1
100735_at	50	50	50	50		50	50	50	50	50	50	50	50		Mus musculus mRNA for high-glycine tyrosine keratin type II.3, partial cds /cds=(0,165) /gb=D89901 /gi=1944456 /ug=Mm.3504 /len=444 /STRA=for			50	50	1	#DIV/0!		1	1
100736_at	50	50	50	50		50	50	50	50	50	50	50	50		Mus Musculus Barx2 mRNA, complete cds /cds=(67,753) /gb=L77900 /gi=2055363 /ug=Mm.3508 /len=1274 /STRA=for			50	50	1	#DIV/0!		1	1
100737_at	50	50	50	50		50	50	50	50	50	50	50	50		Hepatic nuclear factor 6 /cds=(169,1566) /gb=U95945 /gi=2072997 /ug=Mm.3512 /len=1628 /STRA=for			50	50	1	#DIV/0!		1	1
100739_at	50	50	50	50		50	50	50	50	50	50	50	50		Mus musculus serine proteinase inhibitor mBM17 mRNA, partial cds /cds=(0,440) /gb=U96702 /gi=2104738 /ug=Mm.3518 /len=594 /STRA=for			50	50	1	#DIV/0!		1	1
100740_at	50	50	50	50		50	50	50	50	50	50	50	50		M.musculus platelet glycoprotein V gene /cds=(2,1705) /gb=Z69595 /gi=2104844 /ug=Mm.3519 /len=2179 /STRA=for			50	50	1	#DIV/0!		1	1
100741_at	50	50	50	50		50	50	50	50	50	50	50	50		Mus musculus lipoxin A4 receptor mRNA, complete cds /cds=(59,1114) /gb=U78299 /gi=2114401 /ug=Mm.3522 /len=1268 /STRA=for			50	50	1	#DIV/0!		1	1
100744_at	50	50	50	50		50	50	50	50	50	50	50	50		EST01965 Mus musculus cDNA, 3' end /clone=C0016B06 /clone_end=3' /gb=AA410078 /gi=2066880 /ug=Mm.3657 /len=506 /STRA=rev			50	50	1	#DIV/0!		1	1
100745_r_at	50	50	50	50		50	50	50	50	50	50	50	50		EST02637 Mus musculus cDNA, 3' end /clone=C0024C01 /clone_end=3' /gb=AA408156 /gi=2067552 /ug=Mm.3682 /len=360 /STRA=rev			50	50	1	#DIV/0!		1	1
100747_at	50	50	50	50		50	50	50	50	50	50	50	50		EST03446 Mus musculus cDNA, 3' end /clone=C0035D09 /clone_end=3' /gb=AA408954 /gi=2068361 /ug=Mm.3737 /len=353 /STRA=rev			50	50	1	#DIV/0!		1	1
100748_at	50	50	50	50		50	50	50	50	50	50	50	50		EST03490 Mus musculus cDNA, 3' end /clone=C0035H05 /clone_end=3' /gb=AA409010 /gi=2068405 /ug=Mm.3739 /len=508 /STRA=rev			50	50	1	#DIV/0!		1	1
100752_at	50	50	50	50		50	50	50	50	50	50	50	50		Retinal pigment epithelium derived rhodopsin homolog /cds=(27,1040) /gb=AF012271 /gi=2307011 /ug=Mm.3917 /len=1171 /STRA=for			50	50	1	#DIV/0!		1	1
100754_at	50	50	50	50		50	50	50	50	50	50	50	50		Mus musculus Evi-1 mRNA /cds=(267,3422) /gb=X54989 /gi=50873 /ug=Mm.4104 /len=3570 /STRA=for			50	50	1	#DIV/0!		1	1
100761_at	50	50	50	50		50	50	50	50	50	50	50	50		Mus musculus mRNA for striatin /cds=(0,2342) /gb=AJ223777 /gi=2828300 /ug=Mm.9093 /len=2603 /STRA=for			50	50	1	#DIV/0!		1	1
100762_at	50	50	50	50		50	50	50	50	50	50	50	50		Mus musculus semaphorin VIa mRNA, complete cds /cds=(73,2739) /gb=AF030430 /gi=2623161 /ug=Mm.9212 /len=2770 /STRA=rev			50	50	1	#DIV/0!		1	1
100766_at	50	50	50	50		50	50	50	50	50	50	50	50		Endothelin 3 /cds=(349,993) /gb=U32330 /gi=1041724 /ug=Mm.9478 /len=1068 /STRA=for			50	50	1	#DIV/0!		1	1
100767_at	50	50	50	50		50	50	50	50	50	50	50	50		C80936 Mus musculus cDNA, 3' end /clone=J0090H12 /clone_end=3' /gb=C80936 /gi=2521266 /ug=Mm.95638 /len=616 /STRA=rev			50	50	1	#DIV/0!		1	1
100769_at	50	50	50	50		50	50	50	50	50	50	50	50		AU045946 Mus musculus cDNA, 3' end /clone=J0944C07 /clone_end=3' /gb=AU045946 /gi=3982129 /ug=Mm.97094 /len=552 /STRA=rev			50	50	1	#DIV/0!		1	1
100771_at	50	50	50	50		50	50	50	50	50	50	50	50		Mus musculus B cell linker protein BLNK mRNA, complete cds /cds=(132,1505) /gb=AF068182 /gi=3406752 /ug=Mm.9749 /len=1719 /STRA=for			50	50	1	#DIV/0!		1	1
100772_g_at	50	50	50	50		50	50	50	50	50	50	50	50		Mus musculus B cell linker protein BLNK mRNA, complete cds /cds=(132,1505) /gb=AF068182 /gi=3406752 /ug=Mm.9749 /len=1719 /STRA=for			50	50	1	#DIV/0!		1	1
100773_at	50	50	50	50		50	50	50	50	50	50	50	50		Interleukin 12a /cds=(126,773) /gb=M86672 /gi=198336 /ug=Mm.979 /len=1265 /STRA=for			50	50	1	#DIV/0!		1	1
100776_at	50	50	50	50		50	50	50	50	50	50	50	50		ub88c08.r1 Mus musculus cDNA, 5' end /clone=IMAGE-1395566 /clone_end=5' /gb=AI117463 /gi=3517787 /ug=Mm.98654 /len=463 /STRA=for			50	50	1	#DIV/0!		1	1
100779_at	50	50	50	50		50	50	50	50	50	50	50	50		Interleukin 12b /cds=(34,1041) /gb=M86671 /gi=293663 /ug=Mm.997 /len=1840 /STRA=for			50	50	1	#DIV/0!		1	1
100839_at	50	50	50	50		50	50	50	50	50	50	50	50		mg45a03.x1 Mus musculus cDNA, 3' end /clone=IMAGE-426700 /clone_end=3' /gb=AI327166 /gi=4061595 /ug=Mm.20132 /len=699 /STRA=rev			50	50	1	#DIV/0!		1	1
100879_at	50	50	50	50		50	50	50	50	50	50	50	50		Mus musculus alpha-actinin 3 (Actn3) mRNA, complete cds /cds=(30,2732) /gb=AF093775 /gi=3694989 /ug=Mm.5316 /len=2855 /STRA=for			50	50	1	#DIV/0!		1	1
100882_at	50	50	50	50		50	50	50	50	50	50	50	50		Defensin beta 1 /cds=(42,251) /gb=AF003525 /gi=2197074 /ug=Mm.5341 /len=398 /STRA=for			50	50	1	#DIV/0!		1	1
100883_at	50	50	50	50		50	50	50	50	50	50	50	50		ud10d12.r1 Mus musculus cDNA, 5' end /clone=IMAGE-1434743 /clone_end=5' /gb=AI877468 /gi=5551517 /ug=Mm.5376 /len=488 /STRA=for			50	50	1	#DIV/0!		1	1
100888_at	50	50	50	50		50	50	50	50	50	50	50	50		Mus musculus mRNA for LR11, complete cds /cds=(0,6647) /gb=AB015790 /gi=3273351 /ug=Mm.5396 /len=6648 /STRA=for			50	50	1	#DIV/0!		1	1
100896_at	50	50	50	50		50	50	50	50	50	50	50	50		Mus musculus mRNA for skeletal muscle calcium channel, gamma-subunit /cds=(131,802) /gb=AJ006306 /gi=3157401 /ug=Mm.57093 /len=803 /STRA=for			50	50	1	#DIV/0!		1	1
100898_r_at	50	50	50	50		50	50	50	50	50	50	50	50		Mus musculus major histocompatibility locus class II region; Fas-binding protein Daxx (DAXX) gene, partial cds; Bing1 (BING1), tapasin (tapasin), RalGDS-like factor (RLF), KE2 (KE2), BING4 (BING4), beta1, 3-galactosyl transferase (be /STRA=for			50	50	1	#DIV/0!		1	1
100901_at	50	50	50	50		50	50	50	50	50	50	50	50		Mus musculus C1 transcription factor gene, complete cds /cds=(0,6137) /gb=U80821 /gi=4098677 /ug=Mm.57203 /len=6138 /STRA=for			50	50	1	#DIV/0!		1	1
100907_at	50	50	50	50		50	50	50	50	50	50	50	50		Mus musculus mRNA for minK-like protein /cds=(173,604) /gb=AJ131398 /gi=6066551 /ug=Mm.58507 /len=1446 /STRA=for			50	50	1	#DIV/0!		1	1
100909_at	50	50	50	50		50	50	50	50	50	50	50	50		vv76b01.r1 Mus musculus cDNA, 5' end /clone=IMAGE-1228297 /clone_end=5' /gb=AA760364 /gi=2808158 /ug=Mm.5875 /len=280 /STRA=for			50	50	1	#DIV/0!		1	1
100913_at	50	50	50	50		50	50	50	50	50	50	50	50		UI-M-AI1-afr-h-01-0-UI.s1 Mus musculus cDNA, 3' end /clone=UI-M-AI1-afr-h-01-0-UI /clone_end=3' /gb=AI847418 /gi=5491324 /ug=Mm.5918 /len=348 /STRA=for			50	50	1	#DIV/0!		1	1
100921_at	50	50	50	50		50	50	50	50	50	50	50	50		Mus musculus CD-1 cardiac troponin I mRNA, complete cds /cds=(0,635) /gb=U09181 /gi=484093 /ug=Mm.604 /len=636 /STRA=for			50	50	1	#DIV/0!		1	1
100924_at	50	50	50	50		50	50	50	50	50	50	50	50		GATA-binding protein 3 /cds=(207,1538) /gb=X55123 /gi=51052 /ug=Mm.606 /len=2056 /STRA=for			50	50	1	#DIV/0!		1	1
100926_at	50	50	50	50		50	50	50	50	50	50	50	50		UI-M-AK0-adf-d-09-0-UI.s1 Mus musculus cDNA, 3' end /clone=UI-M-AK0-adf-d-09-0-UI /clone_end=3' /gb=AI837334 /gi=5471547 /ug=Mm.608 /len=373 /STRA=rev			50	50	1	#DIV/0!		1	1
100932_at	50	50	50	50		50	50	50	50	50	50	50	50		Mus musculus calpain I large subunit (Capn1) mRNA, complete cds /cds=(9,2150) /gb=AF084459 /gi=3462901 /ug=Mm.6221 /len=2320 /STRA=for			50	50	1	#DIV/0!		1	1
100939_at	50	50	50	50		50	50	50	50	50	50	50	50		UI-M-BH2.1-apj-h-02-0-UI.s1 Mus musculus cDNA, 3' end /clone=UI-M-BH2.1-apj-h-02-0-UI /clone_end=3' /gb=AW123479 /gi=6099009 /ug=Mm.6352 /len=444 /STRA=for			50	50	1	#DIV/0!		1	1
100944_at	50	50	50	50		50	50	50	50	50	50	50	50		ua19f08.r1 Mus musculus cDNA, 5' end /clone=IMAGE-1347207 /clone_end=5' /gb=AA958903 /gi=3125133 /ug=Mm.6381 /len=384 /STRA=for			50	50	1	#DIV/0!		1	1
100956_at	50	50	50	50		50	50	50	50	50	50	50	50		Mus musculus klotho mRNA, complete cds /cds=(18,3062) /gb=AB005141 /gi=2618593 /ug=Mm.6500 /len=5032 /STRA=for			50	50	1	#DIV/0!		1	1
100958_at	50	50	50	50		50	50	50	50	50	50	50	50		ub68e09.x1 Mus musculus cDNA, 3' end /clone=IMAGE-1382920 /clone_end=3' /gb=AI647003 /gi=4725478 /ug=Mm.6519 /len=467 /STRA=for			50	50	1	#DIV/0!		1	1
100967_at	50	50	50	50		50	50	50	50	50	50	50	50		Mus musculus fatty acid transport protein 2 mRNA, complete cds /cds=(0,1871) /gb=AF072757 /gi=3335564 /ug=Mm.6611 /len=1872 /STRA=for			50	50	1	#DIV/0!		1	1
100971_at	50	50	50	50		50	50	50	50	50	50	50	50		Mus musculus TEF-5 gene, exon 1 to exon 13 /cds=(50,1432) /gb=AJ131526 /gi=4468625 /ug=Mm.6655 /len=3331 /STRA=for			50	50	1	#DIV/0!		1	1
100972_s_at	50	50	50	50		50	50	50	50	50	50	50	50		UI-M-BH2.1-apv-c-08-0-UI.s1 Mus musculus cDNA, 3' end /clone=UI-M-BH2.1-apv-c-08-0-UI /clone_end=3' /gb=AW124975 /gi=6100505 /ug=Mm.6660 /len=304 /STRA=for			50	50	1	#DIV/0!		1	1
100973_i_at	50	50	50	50		50	50	50	50	50	50	50	50		vo59c05.r1 Mus musculus cDNA, 5' end /clone=IMAGE-1054184 /clone_end=5' /gb=AA672499 /gi=2644716 /ug=Mm.6660 /len=391 /STRA=for			50	50	1	#DIV/0!		1	1
100975_f_at	50	50	50	50		50	50	50	50	50	50	50	50		UI-M-BH0-akb-f-08-0-UI.s1 Mus musculus cDNA, 3' end /clone=UI-M-BH0-akb-f-08-0-UI /clone_end=3' /gb=AI854882 /gi=5498788 /ug=Mm.6667 /len=300 /STRA=for			50	50	1	#DIV/0!		1	1
100981_at	50	50	50	50		50	50	50	50	50	50	50	50		Interferon-induced protein with tetratricopeptide repeats 1 /cds=(69,1460) /gb=U43084 /gi=1401059 /ug=Mm.6718 /len=2101 /STRA=for			50	50	1	#DIV/0!		1	1
100996_at	50	50	50	50		50	50	50	50	50	50	50	50		Mus musculus putative lysophosphatidic acid acyltransferase mRNA, complete cds /cds=(9,893) /gb=AF015811 /gi=2317724 /ug=Mm.671 /len=1047 /STRA=for			50	50	1	#DIV/0!		1	1
100998_at	50	50	50	50		50	50	50	50	50	50	50	50		Mouse MHC class II H2-I-A-beta gene (k haplotype), 3' end /cds=(0,697) /gb=M21932 /gi=199495 /ug=Mm.6716 /len=740 /STRA=for			50	50	1	#DIV/0!		1	1
101010_at	50	50	50	50		50	50	50	50	50	50	50	50		Mus musculus p160 myb-binding protein (P160) mRNA, complete cds /cds=(15,4049) /gb=U63648 /gi=2645204 /ug=Mm.6805 /len=4126 /STRA=for			50	50	1	#DIV/0!		1	1
101019_at	50	50	50	50		50	50	50	50	50	50	50	50		Cathepsin C /cds=(67,1455) /gb=U74683 /gi=2145015 /ug=Mm.684 /len=1767 /STRA=for			50	50	1	#DIV/0!		1	1
101020_at	50	50	50	50		50	50	50	50	50	50	50	50		UI-M-AO1-aeo-a-04-0-UI.s1 Mus musculus cDNA, 3' end /clone=UI-M-AO1-aeo-a-04-0-UI /clone_end=3' /gb=AI842667 /gi=5476880 /ug=Mm.684 /len=284 /STRA=for			50	50	1	#DIV/0!		1	1
101024_i_at	50	50	50	50		50	50	50	50	50	50	50	50		Small proline-rich protein 2A /cds=(0,251) /gb=AJ005559 /gi=3093357 /ug=Mm.6853 /len=252 /STRA=for			50	50	1	#DIV/0!		1	1
101026_at	50	50	50	50		50	50	50	50	50	50	50	50		Mus musculus pituitary tumor transforming gene (Pttg) mRNA, complete cds /cds=(311,877) /gb=AF071209 /gi=3978251 /ug=Mm.6856 /len=1683 /STRA=for			50	50	1	#DIV/0!		1	1
101028_i_at	50	50	50	50		50	50	50	50	50	50	50	50		Actin, alpha, cardiac /cds=(0,1127) /gb=M15501 /gi=191653 /ug=Mm.686 /len=1226 /STRA=for			50	50	1	#DIV/0!		1	1
101041_at	50	50	50	50		50	50	50	50	50	50	50	50		Mouse keratin (epidermal) type I mRNA, clone pkScc-52, 3' end /cds=(0,1079) /gb=M13806 /gi=198628 /ug=Mm.6974 /len=1224 /STRA=for			50	50	1	#DIV/0!		1	1
101043_f_at	50	50	50	50		50	50	50	50	50	50	50	50		Mus musculus TCR beta locus from bases 250554 to 501917 (section 2 of 3) of the complete sequence /cds=(0,740) /gb=AE000664 /gi=2358084 /ug=Mm.6977 /len=741 /STRA=for			50	50	1	#DIV/0!		1	1
101048_at	50	50	50	50		50	50	50	50	50	50	50	50		Protein tyrosine phosphatase, receptor type, C /cds=UNKNOWN /gb=M14343 /gi=198918 /ug=Mm.70 /len=5186 /STRA=for			50	50	1	#DIV/0!		1	1
101052_g_at	50	50	50	50		50	50	50	50	50	50	50	50		Mus musculus S100A3 calcium binding protein mRNA, complete cds /cds=(59,364) /gb=AF004941 /gi=3916049 /ug=Mm.703 /len=712 /STRA=for			50	50	1	#DIV/0!		1	1
101058_at	50	50	50	50		50	50	50	50	50	50	50	50		mouse alpha-amylase-1 mrna without leader /cds=(48,1583) /gb=J00356 /gi=191906 /ug=Mm.7074 /len=1615 /STRA=for			50	50	1	#DIV/0!		1	1
101063_at	50	50	50	50		50	50	50	50	50	50	50	50		M.musculus slow/cardiac troponin C (cTnC) mRNA, complete cds /cds=(43,528) /gb=M29793 /gi=192839 /ug=Mm.712 /len=703 /STRA=for			50	50	1	#DIV/0!		1	1
101071_at	50	50	50	50		50	50	50	50	50	50	50	50		Myosin heavy chain, cardiac muscle, adult /cds=(0,5816) /gb=M76599 /gi=191619 /ug=Mm.7215 /len=5817 /STRA=for			50	50	1	#DIV/0!		1	1
101075_f_at	50	50	50	50		50	50	50	50	50	50	50	50		Mus musculus mRNA for GOB-4, complete cds /cds=(51,578) /gb=AB016592 /gi=3395165 /ug=Mm.7244 /len=758 /STRA=for			50	50	1	#DIV/0!		1	1
101076_r_at	50	50	50	50		50	50	50	50	50	50	50	50		Mus musculus mRNA for GOB-4, complete cds /cds=(51,578) /gb=AB016592 /gi=3395165 /ug=Mm.7244 /len=758 /STRA=for			50	50	1	#DIV/0!		1	1
101087_r_at	50	50	50	50		50	50	50	50	50	50	50	50		Mus musculus mRNA for cellular nucleic acid binding protein /cds=(104,616) /gb=X63866 /gi=50470 /ug=Mm.7335 /len=1492 /STRA=for			50	50	1	#DIV/0!		1	1
101089_at	50	50	50	50		50	50	50	50	50	50	50	50		Mus musculus alpha-actinin-2 associated LIM protein mRNA, alternatively spliced product, complete cds /cds=(119,1069) /gb=AF002283 /gi=3138925 /ug=Mm.7342 /len=1485 /STRA=for			50	50	1	#DIV/0!		1	1
101095_at	50	50	50	50		50	50	50	50	50	50	50	50		Microfibril-associated glycoprotein /cds=(80,631) /gb=L23769 /gi=440831 /ug=Mm.7386 /len=1020 /STRA=for			50	50	1	#DIV/0!		1	1
101114_at	50	50	50	50		50	50	50	50	50	50	50	50		Mus musculus signal recognition particle receptor beta subunit mRNA, complete cds /cds=(20,829) /gb=U17343 /gi=600885 /ug=Mm.7588 /len=850 /STRA=for			50	50	1	#DIV/0!		1	1
101116_at	50	50	50	50		50	50	50	50	50	50	50	50		vh78a04.r1 Mus musculus cDNA, 3' end /clone=IMAGE-893070 /clone_end=3' /gb=AA511245 /gi=2249099 /ug=Mm.4193 /len=497 /STRA=rev			50	50	1	#DIV/0!		1	1
101117_at	50	50	50	50		50	50	50	50	50	50	50	50		vh78d01.r1 Mus musculus cDNA, 3' end /clone=IMAGE-893089 /clone_end=3' /gb=AA511261 /gi=2249115 /ug=Mm.4196 /len=342 /STRA=rev			50	50	1	#DIV/0!		1	1
101118_at	50	50	50	50		50	50	50	50	50	50	50	50		vh78d08.r1 Mus musculus cDNA, 3' end /clone=IMAGE-893103 /clone_end=3' /gb=AA511266 /gi=2249120 /ug=Mm.4197 /len=181 /STRA=rev			50	50	1	#DIV/0!		1	1
101120_at	50	50	50	50		50	50	50	50	50	50	50	50		vh79g11.r1 Mus musculus cDNA, 3' end /clone=IMAGE-893252 /clone_end=3' /gb=AA517731 /gi=2257255 /ug=Mm.4241 /len=372 /STRA=rev			50	50	1	#DIV/0!		1	1
101121_at	50	50	50	50		50	50	50	50	50	50	50	50		vh80h04.r1 Mus musculus cDNA, 3' end /clone=IMAGE-893335 /clone_end=3' /gb=AA517747 /gi=2257271 /ug=Mm.4242 /len=257 /STRA=rev			50	50	1	#DIV/0!		1	1
101124_at	50	50	50	50		50	50	50	50	50	50	50	50		vh78a12.r1 Mus musculus cDNA, 3' end /clone=IMAGE-893086 /clone_end=3' /gb=AA522008 /gi=2262753 /ug=Mm.4287 /len=647 /STRA=rev			50	50	1	#DIV/0!		1	1
101125_at	50	50	50	50		50	50	50	50	50	50	50	50		vj86c09.r1 Mus musculus cDNA, 3' end /clone=IMAGE-943984 /clone_end=3' /gb=AA536953 /gi=2282946 /ug=Mm.4334 /len=313 /STRA=rev			50	50	1	#DIV/0!		1	1
101127_at	50	50	50	50		50	50	50	50	50	50	50	50		C. elegans ceh-10 homeo domain containing homolog /cds=(0,1085) /gb=L34808 /gi=623165 /ug=Mm.4405 /len=3089 /STRA=for			50	50	1	#DIV/0!		1	1
101128_at	50	50	50	50		50	50	50	50	50	50	50	50		Mus musculus dihydropyridine sensitive skeletal muscle calcium channel mRNA, complete cds /cds=(116,4171) /gb=L06234 /gi=192323 /ug=Mm.4418 /len=6010 /STRA=for			50	50	1	#DIV/0!		1	1
101131_at	50	50	50	50		50	50	50	50	50	50	50	50		Acetylcholine receptor alpha 7 neural /cds=(50,1558) /gb=L37663 /gi=790853 /ug=Mm.4611 /len=1848 /STRA=for			50	50	1	#DIV/0!		1	1
101132_at	50	50	50	50		50	50	50	50	50	50	50	50		Mouse voltage-gated sodium channel mRNA /cds=(251,5296) /gb=L36179 /gi=609544 /ug=Mm.4623 /len=5482 /STRA=for			50	50	1	#DIV/0!		1	1
101133_at	50	50	50	50		50	50	50	50	50	50	50	50		Mouse mRNA for VNSP I(vomeronasal secretory protein I) /cds=(4,567) /gb=D38580 /gi=2160455 /ug=Mm.4632 /len=684 /STRA=for			50	50	1	#DIV/0!		1	1
101134_at	50	50	50	50		50	50	50	50	50	50	50	50		Granule cell antiserum positive 8 /cds=(0,258) /gb=L10908 /gi=192556 /ug=Mm.4638 /len=1116 /STRA=for			50	50	1	#DIV/0!		1	1
101135_at	50	50	50	50		50	50	50	50	50	50	50	50		Calcitonin receptor /cds=(507,2054) /gb=U18542 /gi=604510 /ug=Mm.4642 /len=3731 /STRA=for			50	50	1	#DIV/0!		1	1
101136_at	50	50	50	50		50	50	50	50	50	50	50	50		Tumor necrosis factor (ligand) superfamily, member 8 /cds=(112,831) /gb=L09754 /gi=349288 /ug=Mm.4664 /len=1783 /STRA=for			50	50	1	#DIV/0!		1	1
101139_r_at	50	50	50	50		50	50	50	50	50	50	50	50		Mus musculus mucin apoprotein mRNA, complete cds /cds=(101,922) /gb=U37531 /gi=1051252 /ug=Mm.4713 /len=1042 /STRA=for			50	50	1	#DIV/0!		1	1
101142_at	50	50	50	50		50	50	50	50	50	50	50	50		Frizzled homolog 6, (Drosophila) /cds=(145,2274) /gb=U43319 /gi=1151255 /ug=Mm.4769 /len=2492 /STRA=for			50	50	1	#DIV/0!		1	1
101143_at	50	50	50	50		50	50	50	50	50	50	50	50		Frizzled homolog 7, (Drosophila) /cds=(361,2079) /gb=U43320 /gi=1151257 /ug=Mm.4770 /len=2260 /STRA=for			50	50	1	#DIV/0!		1	1
101144_at	50	50	50	50		50	50	50	50	50	50	50	50		Mus musculus putative transmembrane receptor IL-1Rrp mRNA, complete cds /cds=(380,1993) /gb=U43673 /gi=1206010 /ug=Mm.4773 /len=2830 /STRA=for			50	50	1	#DIV/0!		1	1
101145_at	50	50	50	50		50	50	50	50	50	50	50	50		Mus musculus intranuclear protein mRNA, complete cds /cds=(310,1650) /gb=U33198 /gi=1244449 /ug=Mm.4786 /len=2278 /STRA=for			50	50	1	#DIV/0!		1	1
101146_at	50	50	50	50		50	50	50	50	50	50	50	50		Genomic screened homeo box 1 /cds=(194,979) /gb=U21224 /gi=836957 /ug=Mm.4797 /len=1786 /STRA=for			50	50	1	#DIV/0!		1	1
101149_at	50	50	50	50		50	50	50	50	50	50	50	50		Mus musculus ShcC mRNA, complete cds /cds=(3,1427) /gb=U46854 /gi=1276941 /ug=Mm.4803 /len=1535 /STRA=for			50	50	1	#DIV/0!		1	1
101151_at	50	50	50	50		50	50	50	50	50	50	50	50		Recoverin /cds=(99,707) /gb=X66196 /gi=311931 /ug=Mm.4830 /len=1062 /STRA=for			50	50	1	#DIV/0!		1	1
101153_at	50	50	50	50		50	50	50	50	50	50	50	50		Mus musculus oncofetal antigen mRNA, partial cds /cds=(0,1637) /gb=U06662 /gi=463842 /ug=Mm.4849 /len=1794 /STRA=for			50	50	1	#DIV/0!		1	1
101154_at	50	50	50	50		50	50	50	50	50	50	50	50		vh85f06.r1 Mus musculus cDNA, 3' end /clone=IMAGE-893795 /clone_end=3' /gb=AA517023 /gi=2256612 /ug=Mm.4902 /len=456 /STRA=rev			50	50	1	#DIV/0!		1	1
101155_at	50	50	50	50		50	50	50	50	50	50	50	50		M.musculus mRNA for heat shock transcripton factor 2 /cds=(158,1711) /gb=X61754 /gi=51447 /ug=Mm.4934 /len=1972 /STRA=for			50	50	1	#DIV/0!		1	1
101156_at	50	50	50	50		50	50	50	50	50	50	50	50		M.musculus (Balb/C) HTx02 mRNA /cds=(0,78) /gb=Z31359 /gi=467572 /ug=Mm.4935 /len=247 /STRA=for			50	50	1	#DIV/0!		1	1
101157_at	50	50	50	50		50	50	50	50	50	50	50	50		Part of messenger RNA for mouse delta-immunoglobulin (codes for part of exon 8 - one of two alternate C-termini) /cds=(0,82) /gb=V00790 /gi=51778 /ug=Mm.4939 /len=206 /STRA=for			50	50	1	#DIV/0!		1	1
101158_at	50	50	50	50		50	50	50	50	50	50	50	50		Zinc finger protein 2 /cds=(432,1475) /gb=Y00850 /gi=52810 /ug=Mm.4958 /len=2615 /STRA=for			50	50	1	#DIV/0!		1	1
101159_at	50	50	50	50		50	50	50	50	50	50	50	50		Microphthalmia-associated transcription factor /cds=(129,1388) /gb=Z23066 /gi=396739 /ug=Mm.4978 /len=1922 /STRA=for			50	50	1	#DIV/0!		1	1
101160_at	50	50	50	50		50	50	50	50	50	50	50	50		Macrophage inflammatory protein 2 /cds=(46,348) /gb=X53798 /gi=53128 /ug=Mm.4979 /len=1083 /STRA=for			50	50	1	#DIV/0!		1	1
101162_at	50	50	50	50		50	50	50	50	50	50	50	50		Myogenic factor 5 /cds=(0,767) /gb=X56182 /gi=53295 /ug=Mm.4984 /len=1898 /STRA=for			50	50	1	#DIV/0!		1	1
101163_at	50	50	50	50		50	50	50	50	50	50	50	50		Recombination activating gene 2 /cds=(155,1738) /gb=M64796 /gi=2576245 /ug=Mm.4988 /len=2062 /STRA=for			50	50	1	#DIV/0!		1	1
101164_at	50	50	50	50		50	50	50	50	50	50	50	50		Tax-transcriptionally activated glycoprotein 1 ligand /cds=(147,743) /gb=U12763 /gi=551080 /ug=Mm.4994 /len=1633 /STRA=for			50	50	1	#DIV/0!		1	1
101166_at	50	50	50	50		50	50	50	50	50	50	50	50		Zinc finger protein 29 /cds=(103,1947) /gb=X55126 /gi=55470 /ug=Mm.5010 /len=2094 /STRA=for			50	50	1	#DIV/0!		1	1
101167_at	50	50	50	50		50	50	50	50	50	50	50	50		Mouse Sp6 mRNA containing period repeat /cds=(975,1265) /gb=X12807 /gi=53650 /ug=Mm.5026 /len=2203 /STRA=for			50	50	1	#DIV/0!		1	1
101168_at	50	50	50	50		50	50	50	50	50	50	50	54		M.musculus (Balb/C) P/L01 mRNA /cds=(0,139) /gb=Z31360 /gi=467579 /ug=Mm.5029 /len=421 /STRA=for			50	50	1	#DIV/0!		1.08	1
101169_at	50	50	50	50		50	50	50	50	50	50	50	50		Peripherin 2 /cds=(212,1252) /gb=X14770 /gi=53917 /ug=Mm.5032 /len=2632 /STRA=for			50	50	1	#DIV/0!		1	1
101170_at	50	50	50	50		50	50	50	50	50	50	50	50		M.musculus mRNA for 5HT1E beta serotonin receptor /cds=(309,1409) /gb=Z14224 /gi=54189 /ug=Mm.5040 /len=1539 /STRA=for			50	50	1	#DIV/0!		1	1
101173_at	50	50	50	50		50	50	50	50	50	50	50	50		Phosphatidylcholine transfer protein /cds=(0,525) /gb=Z50024 /gi=897785 /ug=Mm.5062 /len=669 /STRA=for			50	50	1	#DIV/0!		1	1
101175_at	50	50	50	50		50	50	50	50	50	50	50	50		Mus musculus MEK kinase 2, mRNA, partial cds /cds=(426,2285) /gb=U43186 /gi=1223899 /ug=Mm.5067 /len=2465 /STRA=for			50	50	1	#DIV/0!		1	1
101176_at	50	50	50	50		50	50	50	50	50	50	50	50		Mouse mRNA for VNSP II (vomeronasal secretory protein II) /cds=(15,572) /gb=D38581 /gi=1408323 /ug=Mm.5069 /len=774 /STRA=for			50	50	1	#DIV/0!		1	1
101178_at	50	50	50	50		50	50	50	50	50	50	50	50		M.musculus mRNA for semaphorin E /cds=(140,2395) /gb=X85994 /gi=854331 /ug=Mm.5071 /len=2477 /STRA=for			50	50	1	#DIV/0!		1	1
101181_at	50	50	50	50		50	50	50	50	50	50	50	50		Mus musculus cyclic nucleotide-gated olfactory channel protein gene, complete cds /cds=(26,2020) /gb=U49391 /gi=1480470 /ug=Mm.5097 /len=2741 /STRA=for			50	50	1	#DIV/0!		1	1
101183_at	50	50	50	50		50	50	50	50	50	50	50	50		Synaptotagmin 2 /cds=(15,1283) /gb=D37793 /gi=688411 /ug=Mm.5102 /len=1876 /STRA=for			50	50	1	#DIV/0!		1	1
101187_at	50	50	50	50		50	50	50	50	50	50	50	50		Mus musculus plasminogen activator inhibitor 3 (mPCI) gene, promoter region, partial sequence /cds=(124,1341) /gb=U67878 /gi=1527208 /ug=Mm.5123 /len=2125 /STRA=for			50	50	1	#DIV/0!		1	1
101188_at	50	50	50	50		50	50	50	50	50	50	50	50		Mouse GIRK1 mRNA for G protein coupled inward rectifying potassium channel 1, complete cds /cds=(45,1550) /gb=D45022 /gi=808871 /ug=Mm.5127 /len=1679 /STRA=for			50	50	1	#DIV/0!		1	1
[truncated: 8,261 more rows]

## Sheet: fold 1,5 and ttest 0,02
		Negative or undetectable				positive						positive	low					Average	Average
[truncated: 195 more rows]
